# Supplementary material
Source: bioRxiv or medRxiv preprint supplement (https://www.biorxiv.org/highwire/filestream/27180/field_highwire_adjunct_files/1/096271-2.pdf)
Supplement: Supplementary file [file 096271-2.pdf]

**Table S1: Signature of 998 differentially expressed genes between various**

| PrimSeqName | AccessNum       | GeneID    | SeqCode      | change (mean) |
|-------------|-----------------|-----------|--------------|---------------|
| ABCA1       | NM_005502       | 19        | A_24_P235429 | -6,60         |
| ABCB1       | NM_000927       | 5243      | A_23_P82523  | 11,31         |
| ABCG1       | NM_207627       | 9619      | A_23_P166297 | 12,39         |
| ABHD1       | NM_032604       | 84696     | A_23_P17242  | 2,32          |
| ABLIM2      | NM_032432       | 84448     | A_23_P255672 | 5,36          |
| ABLIM3      | NM_014945       | 22885     | A_24_P123408 | 2,92          |
| ABR         | NM_021962       | 29        | A_23_P503182 | 2,08          |
| ACADS       | NM_000017       | 35        | A_23_P65022  | -4,73         |
| ACBD4       | NM_024722       | 79777     | A_23_P107166 | -3,77         |
| ACCN3       | NM_020322       | 9311      | A_23_P93658  | 3,61          |
| ACOT2       | NM_006821       | 10965     | A_24_P301195 | -3,05         |
| ACP5        | NM_001611       | 54        | A_23_P142075 | -5,18         |
| ACPP        | NM_001099       | 55        | A_24_P46130  | 6,21          |
| ACR         | NM_001097       | 49        | A_23_P40734  | 3,91          |
| ACSF2       | NM_025149       | 80221     | A_23_P4190   | 2,34          |
| ADAM22      | AL133090; NM_02 | 53616     | A_24_P355006 | 5,56          |
| ADAMTS1     | NM_006988       | 9510      | A_23_P211039 | 8,50          |
| ADAMTS14    | NM_139155       | 140766    | A_24_P275073 | -3,92         |
| ADAMTS15    | NM_139055       | 170689    | A_23_P52749  | 2,40          |
| ADAMTS18    | NM_199355       | 170692    | A_32_P34844  | 6,12          |
| ADAMTS5     | NM_007038       | 11096     | A_23_P40415  | 9,32          |
| ADAMTSL4    | NM_019032       | 54507     | A_23_P115011 | -2,87         |
| ADCK1       | NM_020421       | 57143     | A_23_P25945  | -3,27         |
| ADH4        | NM_000670       | 127       | A_23_P30098  | 3,39          |
| ADRB2       | NM_000024       | 154       | A_23_P145024 | -4,32         |
| AGBL5       | NM_021831       | 60509     | A_24_P45767  | 2,05          |
| AGK         | BX640861        | 55750     | A_32_P24059  | 3,68          |
| AHNAK       | NM_024060       | 79026     | A_23_P21363  | -1,61         |
| AHR         | NM_001621       | 196       | A_23_P215566 | 6,83          |
| AK123483    | AK123483        | 100506211 | A_24_P886966 | -2,86         |
| AK7         | NM_152327       | 122481    | A_23_P105963 | 3,74          |
| AKAP12      | NM_005100; NM_1 | 9590      | A_32_P152437 | -4,60         |
| AKT2        | NM_001626       | 208       | A_23_P373475 | -2,77         |
| ALCAM       | NM_001627       | 214       | A_23_P41227  | -3,99         |
| ALK         | NM_004304       | 238       | A_23_P324304 | -7,27         |
| ALS2CR4     | NM_001044385    | 65062     | A_24_P941831 | 4,05          |
| ALX1        | NM_006982       | 8092      | A_23_P83798  | 8,06          |
| AMN         | NM_030943       | 81693     | A_23_P48455  | -2,91         |
| AMOT        | NM_133265       | 154796    | A_24_P344961 | 7,30          |
| AMY1C       | NM_001008219    | 278       | A_23_P23611  | 8,35          |
| ANGEL2      | NM_144567       | 90806     | A_24_P28622  | 2,73          |
| ANGPTL2     | NM_012098       | 23452     | A_23_P20864  | -10,77        |
| ANKRD18A    | BC131497        | 253650    | A_24_P172293 | 2,71          |
| ANKRD5      | NM_022096       | 63926     | A_23_P256047 | 6,98          |
| ANKRD50     | NM_020337       | 57182     | A_23_P81017  | 3,75          |
| ANKRD9      | NM_152326       | 122416    | A_23_P307525 | -2,76         |
| ANKS6       | NM_173551       | 203286    | A_23_P362183 | 3,69          |
| ANO1        | NM_018043       | 55107     | A_24_P87036  | 4,04          |
| ANO2        | NM_020373       | 57101     | A_32_P141238 | 2,09          |
| ANO4        | NM_178826       | 121601    | A_23_P409093 | -1,17         |
| ANTXR1      | NM_032208       | 84168     | A_24_P131522 | 6,70          |

|           |                 |           |              |       |
|-----------|-----------------|-----------|--------------|-------|
| ANXA1     | NM_000700       | 301       | A_23_P94501  | 6,74  |
| ANXA2     | NM_001002857    | 302       | A_23_P146644 | -2,05 |
| AOC3      | NM_003734       | 8639      | A_23_P426305 | 2,89  |
| APAF1     | NM_181861       | 317       | A_23_P36611  | -2,07 |
| APC2      | NM_005883       | 10297     | A_23_P101905 | 5,02  |
| ARAP2     | NM_015230       | 116984    | A_32_P83784  | -6,07 |
| AREG      | NM_001657       | 374       | A_23_P259071 | 4,93  |
| ARHGAP10  | NM_024605       | 79658     | A_23_P21548  | -2,77 |
| ARHGDIG   | NM_001176       | 398       | A_24_P215882 | -3,77 |
| ARHGEF6   | NM_004840       | 9459      | A_23_P85024  | 6,43  |
| ARID5B    | NM_032199       | 84159     | A_23_P97871  | -2,59 |
| ARRB1     | NM_004041       | 408       | A_24_P386622 | -4,20 |
| ARRDC4    | NM_183376       | 91947     | A_23_P339818 | 2,20  |
| ARSG      | NM_014960       | 22901     | A_24_P339416 | 2,18  |
| ASMTL     | NM_004192       | 8623      | A_23_P159539 | -3,33 |
| ASPHD1    | NM_181718       | 253982    | A_23_P170667 | 2,71  |
| ATP8A1    | NM_006095       | 10396     | A_23_P30075  | -3,79 |
| ATP8B1    | NM_005603       | 5205      | A_23_P107597 | -2,39 |
| ATXN1     | NM_000332       | 6310      | A_24_P294842 | -4,95 |
| AUTS2     | NM_001127232; N | 26053     | A_32_P809435 | 10,44 |
| AVIL      | NM_006576       | 10677     | A_23_P390157 | 6,76  |
| B3GALT4   | NM_003782       | 8705      | A_23_P111171 | -9,77 |
| B4GALT4   | NM_212543       | 8702      | A_32_P103945 | -4,64 |
| BAG2      | NM_004282       | 9532      | A_23_P356554 | -3,07 |
| BAI2      | NM_001703       | 576       | A_23_P149019 | 2,52  |
| BC004962  | BC004962        | 100506451 | A_32_P144018 | 3,28  |
| BCAN      | BC005081        | 63827     | A_32_P2730   | 2,88  |
| BCO2      | NM_031938       | 83875     | A_23_P116187 | 4,51  |
| BEAN      | NM_001136106    | 146227    | A_32_P153195 | 5,26  |
| BET1      | NM_005868       | 10282     | A_23_P59700  | 3,01  |
| BHLHE41   | NM_030762       | 79365     | A_23_P139500 | 9,72  |
| BIRC3     | NM_001165       | 330       | A_23_P98350  | 26,85 |
| BLZF1     | CR591083        | 8548      | A_23_P23266  | 4,21  |
| BMI1      | NM_005180       | 648       | A_23_P314115 | 3,11  |
| BMP7      | NM_001719       | 655       | A_23_P68487  | 3,38  |
| BMS1P1    | NR_026566       | 728053    | A_32_P142128 | 6,01  |
| BRCA2     | NM_000059       | 675       | A_23_P99452  | -6,38 |
| BRIP1     | NM_032043       | 83990     | A_23_P15844  | -4,14 |
| BX114764  | BX114764        | 100505576 | A_32_P226678 | 3,90  |
| C10orf107 | NM_173554       | 219621    | A_32_P8156   | 8,24  |
| C10orf110 | NR_027709       | 55853     | A_23_P24275  | 3,39  |
| C10orf79  | NM_025145       | 80217     | A_23_P333038 | 15,27 |
| C11orf52  | NM_080659       | 91894     | A_23_P1722   | -2,88 |
| C11orf61  | NM_024631       | 79684     | A_23_P52885  | 2,80  |
| C11orf66  | NM_145017       | 220004    | A_23_P98571  | 3,77  |
| C11orf9   | NM_013279       | 745       | A_23_P75790  | 2,37  |
| C12orf47  | NR_015404       | 51275     | A_24_P256539 | 2,06  |
| C14orf145 | NM_152446       | 145508    | A_23_P320829 | -2,49 |
| C14orf21  | NM_174913       | 161424    | A_23_P326844 | -3,12 |
| C16orf48  | NM_032140       | 84080     | A_23_P14975  | 2,15  |
| C16orf93  | NM_001014979    | 90835     | A_24_P842002 | 2,58  |
| C18orf23  | AK091537        | 147341    | A_23_P371276 | 2,42  |
| C19orf18  | NM_152474       | 147685    | A_23_P303803 | 3,91  |
| C19ORF25  | BF436529        | 148223    | A_24_P878992 | -2,81 |
| C1orf118  | XR_041258       | 374987    | A_24_P110780 | 5,77  |
| C1orf156  | NM_033418       | 92342     | A_23_P85726  | 3,49  |

|           |                 |        |              |        |
|-----------|-----------------|--------|--------------|--------|
| C1orf192  | NM_001013625    | 257177 | A_32_P331139 | 9,26   |
| C1orf194  | NM_001122961    | 127003 | A_32_P15512  | 15,64  |
| C1orf88   | NM_181643       | 128344 | A_32_P215700 | 6,32   |
| C1orf97   | NR_026761       | 84791  | A_23_P1014   | 4,70   |
| C1QL1     | NM_006688       | 10882  | A_23_P77993  | -9,66  |
| C21orf56  | NM_032261       | 84221  | A_23_P371765 | -3,28  |
| C21orf88  | NR_026543       | 114041 | A_32_P34826  | 3,85   |
| C21orf90  | NR_026547       | 114043 | A_24_P339858 | 2,18   |
| C22orf23  | NM_032561       | 84645  | A_23_P132308 | 2,29   |
| C2CD2L    | NM_014807       | 9854   | A_23_P353056 | 2,15   |
| C2orf27A  | NM_013310       | 29798  | A_24_P8888   | 2,06   |
| C2orf55   | NM_207362       | 343990 | A_24_P272313 | 7,86   |
| C2orf88   | NM_001042519    | 84281  | A_23_P17130  | -12,29 |
| C3AR1     | NM_004054       | 719    | A_23_P2431   | -2,79  |
| C4orf12   | NR_015359       | 404201 | A_32_P116271 | 3,18   |
| C5        | NM_001735       | 727    | A_23_P71855  | 6,78   |
| C5orf37   | NM_152408       | 134359 | A_23_P413803 | 3,38   |
| C5orf53   | NM_001007189    | 492311 | A_24_P110558 | 5,15   |
| C5orf54   | NM_022090       | 63920  | A_23_P259103 | 5,96   |
| C5orf56   | AK025221        | 441108 | A_24_P829156 | 2,30   |
| C5orf62   | NM_032947       | 85027  | A_23_P414273 | 8,00   |
| C6orf132  | NM_001164446    | 647024 | A_32_P218355 | -8,65  |
| C6orf150  | NM_138441       | 115004 | A_32_P1173   | -3,86  |
| C6orf165  | AK098840; NM_00 | 154313 | A_23_P385980 | 3,27   |
| C6orf182  | NM_173830       | 285753 | A_24_P189112 | -2,64  |
| C6orf204  | BC045657        | 387119 | A_32_P90709  | -3,93  |
| C6orf223  | NM_153246       | 221416 | A_23_P348183 | -7,12  |
| C6orf35   | NM_018452       | 729515 | A_24_P144620 | -2,52  |
| C6orf97   | NM_025059       | 80129  | A_23_P93514  | 3,97   |
| C7orf38   | NM_145111       | 221786 | A_23_P168810 | 3,06   |
| C7orf53   | NM_182597       | 286006 | A_24_P380679 | 4,83   |
| C7orf57   | NM_001100159    | 136288 | A_32_P3955   | 15,64  |
| C8orf4    | NM_020130       | 56892  | A_23_P253350 | -1,80  |
| C9orf117  | NM_001012502    | 286207 | A_24_P229638 | 13,10  |
| C9orf150  | NM_203403       | 286343 | A_23_P83007  | 5,06   |
| C9orf66   | NM_152569       | 157983 | A_32_P115220 | -6,33  |
| CACNA1H   | NM_021098       | 8912   | A_23_P3483   | 3,30   |
| CACNG6    | NM_145814       | 59285  | A_23_P501933 | 5,88   |
| CADM3     | NM_021189       | 57863  | A_23_P201156 | -2,61  |
| CALCA     | NM_001033953    | 796    | A_24_P198178 | 5,04   |
| CALCRL    | NM_005795       | 10203  | A_23_P39898  | -17,44 |
| CALD1     | NM_033138       | 800    | A_23_P42575  | -3,98  |
| CAMK1D    | NM_020397       | 57118  | A_23_P124252 | 11,11  |
| CAMK2N1   | NM_018584       | 55450  | A_23_P11800  | 6,67   |
| CAMP      | NM_004345       | 820    | A_23_P253791 | 7,55   |
| CAMSAP1L1 | NM_203459       | 23271  | A_23_P406702 | 3,61   |
| CAPG      | NM_001747       | 822    | A_23_P165636 | -2,66  |
| CARD16    | NM_001017534    | 114769 | A_23_P64173  | 7,92   |
| CASC5     | NM_170589       | 57082  | A_24_P378331 | -4,63  |
| CAV1      | NM_001753       | 857    | A_24_P12626  | 2,95   |
| CAV3      | NM_001234       | 859    | A_24_P251599 | 2,84   |
| CBX7      | NM_175709       | 23492  | A_23_P250735 | 2,74   |
| CCDC132   | NM_017667; NM_C | 55610  | A_24_P409219 | 5,23   |
| CCDC135   | NM_032269       | 84229  | A_23_P129367 | 9,16   |
| CCDC148   | NM_138803       | 130940 | A_23_P411825 | 4,41   |
| CCDC19    | NM_012337       | 25790  | A_23_P62642  | 4,32   |

|          |                 |           |              |        |
|----------|-----------------|-----------|--------------|--------|
| CCDC30   | NM_001080850    | 728621    | A_24_P349196 | 7,13   |
| CCDC42B  | NM_001144872    | 387885    | A_24_P84099  | 3,42   |
| CCNA2    | NM_001237       | 890       | A_23_P58321  | -5,12  |
| CCNB3    | NM_033031       | 85417     | A_23_P171107 | 3,13   |
| CCNL2    | NM_001039577    | 81669     | A_24_P376339 | 2,49   |
| CCPG1    | AF011794; NM_02 | 9236      | A_23_P48897  | 4,76   |
| CCRK     | NM_001039803    | 23552     | A_23_P20752  | 2,40   |
| CCT6P1   | AK092180        | 643253    | A_24_P491087 | 3,38   |
| CD109    | NM_133493       | 135228    | A_23_P331928 | -6,52  |
| CD2AP    | NM_012120       | 23607     | A_24_P329152 | -2,78  |
| CD36     | NM_001001547    | 948       | A_23_P111583 | 5,99   |
| CD44     | NM_000610       | 960       | A_23_P24870  | -5,98  |
| CD55     | NM_000574       | 1604      | A_23_P374862 | 3,25   |
| CD70     | NM_001252       | 970       | A_23_P119202 | 6,81   |
| CDC5L    | NM_001253       | 988       | A_23_P156471 | -2,59  |
| CDGAP    | NA              | 57514     | A_32_P226620 | -14,39 |
| CDH16    | NM_004062       | 1014      | A_23_P100240 | 16,85  |
| CDH23    | NM_022124       | 64072     | A_23_P364437 | 6,97   |
| CDKAL1   | CR623381; NM_01 | 54901     | A_23_P44781  | -2,41  |
| CDKL2    | NM_003948       | 8999      | A_23_P259270 | 4,16   |
| CEACAM1  | NM_001024912; N | 634       | A_23_P434118 | -3,18  |
| CELA3B   | NM_007352       | 23436     | A_23_P200579 | -11,19 |
| CEP120   | NM_153223       | 153241    | A_24_P137602 | 3,64   |
| CES2     | NM_003869; NM_1 | 8824      | A_24_P13790  | 3,76   |
| CFI      | NM_000204       | 3426      | A_23_P7212   | 16,36  |
| CGNL1    | NM_032866       | 84952     | A_23_P163306 | -4,37  |
| CGREF1   | NM_006569       | 10669     | A_23_P403445 | 2,76   |
| CHORDC1  | NM_012124       | 26973     | A_23_P138805 | -2,86  |
| CHRNE    | NM_000080       | 1145      | A_23_P304279 | -2,82  |
| CITED4   | NM_133467       | 163732    | A_23_P306804 | -3,75  |
| CKAP2    | NM_018204       | 26586     | A_24_P99090  | -2,27  |
| CKAP2L   | NM_152515       | 150468    | A_23_P388812 | -2,89  |
| CLDN12   | NM_012129       | 9069      | A_23_P412515 | 2,63   |
| CLDN3    | NM_001306       | 1365      | A_23_P71017  | 2,08   |
| CLEC3B   | NM_003278       | 7123      | A_23_P69497  | 2,99   |
| CLGN     | NM_004362       | 1047      | A_23_P18684  | 7,30   |
| CLK4     | NM_020666       | 57396     | A_24_P123521 | 4,06   |
| CLPB     | NM_030813       | 81570     | A_23_P75978  | -3,21  |
| CLSPN    | NM_022111       | 63967     | A_23_P126212 | -3,28  |
| CMKLR1   | NM_001142343    | 1240      | A_24_P766716 | 10,80  |
| CMTM1    | NM_052999       | 113540    | A_23_P106663 | 2,59   |
| CNTFR    | NM_147164       | 1271      | A_23_P9402   | -2,68  |
| CNTNAP3  | NM_033655       | 79937     | A_23_P9135   | 8,14   |
| COL12A1  | NM_004370       | 1303      | A_23_P214168 | -6,52  |
| COL17A1  | NM_000494       | 1308      | A_23_P52323  | -2,41  |
| COL18A1  | NM_030582       | 80781     | A_23_P211212 | -2,30  |
| COL20A1  | NM_020882       | 57642     | A_32_P185637 | 4,32   |
| COL24A1  | NM_152890       | 255631    | A_23_P74701  | 11,58  |
| COL25A1  | BC036669        | 84570     | A_32_P405010 | -6,44  |
| COL5A1   | NM_000093       | 1289      | A_23_P158593 | 6,30   |
| COQ3     | NM_017421       | 51805     | A_23_P111228 | -2,85  |
| COX6B2   | NM_144613       | 125965    | A_24_P267523 | -3,47  |
| CR624517 | CR624517        | 100505938 | A_32_P162709 | 5,61   |
| CREB3L4  | NM_130898       | 148327    | A_23_P63232  | 2,10   |
| CRIP1    | NM_001311       | 1396      | A_23_P44674  | 2,75   |
| CRLF1    | NM_004750       | 9244      | A_23_P56197  | 4,81   |

|               |              |        |              |        |
|---------------|--------------|--------|--------------|--------|
| CROT          | NM_021151    | 54677  | A_23_P168669 | 4,46   |
| CRYM          | NM_001888    | 1428   | A_23_P77731  | 2,03   |
| CSF1R         | NM_005211    | 1436   | A_23_P110791 | -3,14  |
| CSH1          | NM_022640    | 1442   | A_23_P381347 | -2,62  |
| CST6          | NM_001323    | 1474   | A_23_P146946 | -3,85  |
| CSTA          | NM_005213    | 1475   | A_23_P170233 | -5,17  |
| CTAG1A        | NM_139250    | 246100 | A_23_P148541 | 4,65   |
| CUZD1         | NM_022034    | 50624  | A_23_P47058  | 3,69   |
| CXCL14        | NM_004887    | 9547   | A_23_P213745 | -4,26  |
| CXCL2         | NM_002089    | 2920   | A_23_P315364 | 23,24  |
| CXCL3         | NM_002090    | 2921   | A_24_P183150 | 2,14   |
| CXCR4         | NM_001008540 | 7852   | A_23_P102000 | -19,09 |
| CYHR1         | NM_032687    | 50626  | A_23_P123555 | 2,57   |
| CYP4F2        | NM_001082    | 8529   | A_24_P168494 | -2,86  |
| DBF4          | NM_006716    | 10926  | A_24_P943358 | 4,77   |
| DBNDD2        | NM_001048226 | 55861  | A_23_P28772  | 2,98   |
| DCAKD         | NM_024819    | 79877  | A_24_P58331  | -3,12  |
| DCDC2         | NM_016356    | 51473  | A_23_P134162 | -5,24  |
| DCLK1         | NM_004734    | 9201   | A_23_P369994 | -4,85  |
| DCX           | NM_000555    | 1641   | A_23_P500328 | 3,64   |
| DDC           | NM_000790    | 1644   | A_23_P145644 | 3,09   |
| DDX60         | NM_017631    | 55601  | A_23_P41470  | 6,24   |
| DDX60L        | NM_001012967 | 91351  | A_23_P30069  | 5,91   |
| DEAF1         | NM_021008    | 10522  | A_32_P35375  | -2,85  |
| DEFB1         | NM_005218    | 1672   | A_23_P71480  | -3,43  |
| DENND5B       | NM_144973    | 160518 | A_23_P379746 | -2,66  |
| DEPDC1        | NM_017779    | 55635  | A_23_P200310 | -3,43  |
| DES           | NM_001927    | 1674   | A_23_P90710  | -3,23  |
| DGKG          | NM_001346    | 1608   | A_23_P40926  | -6,98  |
| DHRS1         | NM_138452    | 115817 | A_23_P48747  | -4,01  |
| DHX29         | NM_019030    | 54505  | A_23_P81463  | 3,51   |
| DIAPH2        | Y15909       | 1730   | A_32_P50834  | -4,23  |
| DKFZP434I0714 | XM_001715987 | 54553  | A_23_P413303 | 4,69   |
| DKFZP586I1420 | NR_002186    | 222161 | A_23_P403398 | 6,17   |
| DLC1          | NM_182643    | 10395  | A_23_P252721 | -8,34  |
| DLG2          | NM_001364    | 1740   | A_23_P124514 | -6,13  |
| DLG4          | NM_001365    | 1742   | A_23_P411102 | 2,53   |
| DLGAP5        | NM_014750    | 9787   | A_23_P88331  | -3,60  |
| DLL1          | NM_005618    | 28514  | A_23_P167920 | 3,24   |
| DLX3          | NM_005220    | 1747   | A_24_P296587 | 4,55   |
| DMRT3         | NM_021240    | 58524  | A_23_P157895 | -6,86  |
| DMTF1         | NM_021145    | 9988   | A_23_P8664   | 3,81   |
| DNAH7         | NM_018897    | 56171  | A_24_P410776 | 4,57   |
| DNAJC15       | NM_013238    | 29103  | A_23_P117190 | -3,40  |
| DNAJC6        | NM_014787    | 9829   | A_23_P95359  | -5,22  |
| DNALI1        | NM_003462    | 7802   | A_23_P160377 | 3,66   |
| DNM3          | NM_015569    | 26052  | A_23_P371266 | 3,69   |
| DOCK2         | NM_004946    | 1794   | A_24_P408704 | -4,33  |
| DOCK8         | NM_203447    | 81704  | A_32_P181077 | -11,06 |
| DPPA2         | NM_138815    | 151871 | A_23_P405885 | -7,37  |
| DPY19L2       | NM_173812    | 283417 | A_23_P374250 | 8,31   |
| DPY19L2P2     | NR_003561    | 349152 | A_24_P186608 | 4,37   |
| DPY19L2P4     | AK098759     | 442523 | A_24_P409483 | 5,08   |
| DSE           | NM_013352    | 29940  | A_23_P19226  | 5,32   |
| DUSP10        | NM_007207    | 11221  | A_23_P51856  | 2,95   |
| DUSP13        | NM_001007271 | 51207  | A_23_P104471 | -6,05  |

|                |                 |           |              |        |
|----------------|-----------------|-----------|--------------|--------|
| DUSP23         | NM_017823       | 54935     | A_23_P103232 | 3,28   |
| E2F8           | NM_024680       | 79733     | A_23_P35871  | -3,09  |
| EFCAB7         | NM_032437       | 84455     | A_32_P137266 | 3,58   |
| EGF            | NM_001963       | 1950      | A_23_P155979 | 4,05   |
| EID3           | NM_001008394    | 493861    | A_23_P65068  | 3,86   |
| EIF2S2         | CR595813        | 8894      | A_32_P11723  | 3,27   |
| ELK4           | AL117645        | 2005      | A_24_P902091 | 4,13   |
| ENST0000036739 | AJ277914        | 56956     | A_24_P910952 | -3,61  |
| ENST0000037121 | NA              | 221391    | A_23_P58934  | 1,91   |
| EPB41L2        | NM_001431       | 2037      | A_23_P134109 | -4,33  |
| EPB41L4B       | NM_019114       | 54566     | A_23_P387656 | 6,27   |
| EPHA8          | NM_001006943    | 2046      | A_24_P419239 | -6,69  |
| EPHX4          | NM_173567       | 253152    | A_23_P43898  | -4,26  |
| EPM2AIP1       | NM_014805       | 9852      | A_24_P627984 | 4,38   |
| EPS8           | NM_004447       | 2059      | A_23_P136347 | -6,61  |
| ERAP2          | NM_022350       | 64167     | A_23_P30243  | 3,50   |
| ERC1           | NM_178040       | 23085     | A_24_P162293 | -2,45  |
| ERCC6L         | NM_017669       | 54821     | A_23_P96325  | -4,61  |
| ERN2           | NM_033266       | 10595     | A_23_P49310  | -3,06  |
| ERP27          | NM_152321       | 121506    | A_23_P139687 | 8,33   |
| ERP44          | NM_015051       | 23071     | A_23_P373927 | 4,55   |
| EVL            | NM_016337       | 51466     | A_23_P129038 | -2,95  |
| EXD3           | NM_017820       | 54932     | A_24_P49183  | 5,25   |
| EXPH5          | NM_015065       | 23086     | A_24_P937691 | 3,74   |
| EY892390       | EY892390        | 147372    | A_32_P171043 | 2,91   |
| F2RL2          | NM_004101       | 2151      | A_32_P60065  | 8,24   |
| F5             | NM_000130       | 2153      | A_23_P148768 | 35,02  |
| FADS2          | NM_004265       | 9415      | A_24_P150160 | -3,49  |
| FAM101A        | NM_181709       | 144347    | A_32_P200697 | 4,72   |
| FAM107B        | NM_031453       | 83641     | A_23_P149975 | 3,70   |
| FAM110C        | CR601458        | 642273    | A_32_P47643  | 32,65  |
| FAM111A        | BU684362; NM_02 | 63901     | A_23_P203332 | 9,31   |
| FAM124A        | NM_145019       | 220108    | A_23_P344568 | 3,25   |
| FAM167A        | NM_053279       | 83648     | A_23_P334955 | 12,01  |
| FAM179A        | NM_199280       | 165186    | A_24_P595717 | -7,49  |
| FAM183A        | NM_001101376    | 440585    | A_24_P847326 | 4,40   |
| FAM198B        | NM_016613       | 51313     | A_23_P218928 | -16,14 |
| FAM25A         | NM_001146157    | 643161    | A_32_P34138  | -3,63  |
| FAM26F         | NM_001010919    | 441168    | A_23_P7827   | 5,65   |
| FAM27E3        | BC119675        | 100131997 | A_23_P348979 | 2,75   |
| FAM3A          | NM_021806       | 60343     | A_23_P45488  | -3,26  |
| FAM59A         | AF086529; NM_02 | 64762     | A_24_P652510 | 3,28   |
| FAM63A         | NM_001040217    | 55793     | A_23_P160546 | 2,76   |
| FAM71F1        | NM_032599       | 84691     | A_23_P134204 | 6,66   |
| FAM81B         | NM_152548       | 153643    | A_23_P360354 | 16,12  |
| FAM84A         | NM_145175       | 151354    | A_23_P306215 | 2,56   |
| FAM86A         | NM_201400       | 196483    | A_24_P392022 | 2,40   |
| FAM96B         | NM_016062       | 51647     | A_23_P77455  | 2,28   |
| FAR2           | NM_018099       | 55711     | A_23_P150903 | 8,47   |
| FASN           | NM_004104       | 2194      | A_23_P44132  | -6,02  |
| FBLN2          | NM_001004019    | 2199      | A_23_P143981 | -3,76  |
| FBN2           | NM_001999       | 2201      | A_23_P214026 | 5,51   |
| FBXL16         | NM_153350       | 146330    | A_23_P406385 | 5,83   |
| FBXO15         | NM_152676       | 201456    | A_23_P342709 | 3,48   |
| FBXO24         | NM_033506       | 26261     | A_23_P70888  | 2,87   |
| FBXO25         | NM_183420; NM_1 | 26260     | A_24_P247931 | 2,01   |

|          |              |        |              |       |
|----------|--------------|--------|--------------|-------|
| FCAMR    | NM_001122980 | 83953  | A_23_P201510 | 2,25  |
| FER1L4   | NR_024377    | 80307  | A_23_P80048  | 3,32  |
| FERMT2   | NM_006832    | 10979  | A_23_P88347  | -3,86 |
| FGF1     | NM_000800    | 2246   | A_24_P111106 | -9,79 |
| FGFBP1   | NM_005130    | 9982   | A_23_P30126  | -6,09 |
| FGFR4    | NM_213647    | 2264   | A_23_P92754  | -4,73 |
| FHOD3    | NM_025135    | 80206  | A_32_P34444  | 5,77  |
| FKBP7    | NM_181342    | 51661  | A_23_P79622  | 3,02  |
| FLJ10357 | NM_018071    | 55701  | A_23_P99661  | 2,03  |
| FLJ33630 | AF088062     | 644873 | A_32_P147149 | 2,45  |
| FLJ35024 | NR_015375    | 401491 | A_32_P473302 | 3,89  |
| FLJ37644 | AK094963     | 400618 | A_24_P497464 | 1,87  |
| FLVCR2   | NM_017791    | 55640  | A_23_P140373 | 5,32  |
| FMO4     | NM_002022    | 2329   | A_23_P160992 | 3,65  |
| FMR1NB   | NM_152578    | 158521 | A_32_P99019  | 2,34  |
| FOXA2    | NM_021784    | 3170   | A_23_P500936 | -1,85 |
| FOXL2    | NM_023067    | 668    | A_23_P110052 | -4,59 |
| FRK      | NM_002031    | 2444   | A_23_P133665 | 4,92  |
| FUCA2    | NM_032020    | 2519   | A_23_P145408 | -2,59 |
| FXYD4    | NM_173160    | 53828  | A_23_P98121  | -5,35 |
| FZD8     | NM_031866    | 8325   | A_23_P396858 | -4,81 |
| GAGE7    | NM_021123    | 2579   | A_24_P228796 | -7,17 |
| GAL      | NM_015973    | 51083  | A_23_P374844 | -7,37 |
| GALNT14  | NM_024572    | 79623  | A_23_P67847  | -8,98 |
| GALT     | NM_000155    | 2592   | A_24_P12865  | 2,15  |
| GAS1     | NM_002048    | 2619   | A_23_P83134  | 12,73 |
| GAS8     | NM_001481    | 2622   | A_24_P279203 | 2,13  |
| GBP1     | NM_002053    | 2633   | A_23_P62890  | -6,43 |
| GEN1     | NM_182625    | 348654 | A_24_P177585 | -4,43 |
| GINS2    | NM_016095    | 51659  | A_23_P118246 | -2,19 |
| GJB1     | NM_000166    | 2705   | A_23_P250444 | -5,62 |
| GJC1     | NM_005497    | 10052  | A_23_P428287 | -6,43 |
| GKAP1    | NM_025211    | 80318  | A_23_P94546  | 3,10  |
| GLDN     | NM_181789    | 342035 | A_24_P49199  | 5,43  |
| GLO1     | NM_006708    | 2739   | A_23_P214411 | -2,27 |
| GLS      | AF327434     | 2744   | A_24_P294233 | 7,89  |
| GLT8D2   | NM_031302    | 83468  | A_23_P48198  | -1,47 |
| GNG11    | NM_004126    | 2791   | A_23_P111701 | 8,22  |
| GNG4     | NM_004485    | 2786   | A_23_P335329 | -4,07 |
| GNGT2    | NM_031498    | 2793   | A_23_P26994  | -6,25 |
| GOLT1B   | NM_016072    | 51026  | A_24_P321511 | 3,60  |
| GORAB    | NM_152281    | 92344  | A_23_P368145 | 3,48  |
| GPAM     | NM_020918    | 57678  | A_23_P104237 | -2,59 |
| GPBAR1   | NM_001077191 | 151306 | A_23_P400378 | 2,20  |
| GPC3     | NM_004484    | 2719   | A_24_P57631  | 5,13  |
| GPC6     | NM_005708    | 10082  | A_32_P97169  | 5,91  |
| GPR158   | NM_020752    | 57512  | A_24_P349117 | 8,96  |
| GPR177   | NM_024911    | 79971  | A_24_P256380 | -7,74 |
| GPR20    | NM_005293    | 2843   | A_23_P159237 | -3,03 |
| GPR68    | NM_003485    | 8111   | A_24_P931443 | 2,89  |
| GPRIN3   | NM_198281    | 285513 | A_24_P76649  | 1,43  |
| GPSM2    | NM_013296    | 29899  | A_23_P63402  | -2,11 |
| GPSM3    | NM_022107    | 63940  | A_24_P144465 | -2,71 |
| GPX8     | NM_001008397 | 493869 | A_23_P122052 | 3,00  |
| GRB10    | NM_001001555 | 2887   | A_23_P122863 | 4,37  |
| GRIP1    | NM_021150    | 23426  | A_23_P113382 | 3,74  |

|            |                 |        |              |       |
|------------|-----------------|--------|--------------|-------|
| GTF3C6     | NM_138408       | 112495 | A_23_P400465 | -2,19 |
| GTSE1      | AY927428        | 51512  | A_24_P916195 | -5,10 |
| GUCA1C     | NM_005459       | 9626   | A_23_P363331 | -7,45 |
| GUSB       | NM_000181       | 2990   | A_23_P334608 | 2,05  |
| HAGHL      | NM_032304       | 84264  | A_24_P356373 | 2,22  |
| HAPLN1     | NM_001884       | 1404   | A_23_P7727   | 6,08  |
| HAVCR1     | NM_012206       | 26762  | A_23_P347610 | -2,31 |
| HBE1       | NM_005330       | 3046   | A_23_P47665  | 11,94 |
| HBG1       | NM_000559       | 3047   | A_23_P53137  | 6,74  |
| HBQ1       | NM_005331       | 3049   | A_23_P49254  | -4,14 |
| HCFC1R1    | NM_017885       | 54985  | A_23_P26534  | 2,24  |
| HDAC9      | NM_014707       | 9734   | A_23_P404162 | 6,71  |
| HELQ       | NM_133636       | 113510 | A_23_P92614  | 3,99  |
| HHAT       | NM_018194       | 55733  | A_23_P136355 | 4,03  |
| HINT3      | NM_138571       | 135114 | A_23_P145574 | -2,75 |
| HIST1H1A   | NM_005325       | 3024   | A_23_P70448  | -5,96 |
| HIST1H1B   | NM_005322       | 3009   | A_23_P250385 | -4,40 |
| HIST1H2AD  | NM_021065       | 3013   | A_23_P428184 | 4,75  |
| HIST1H2AE  | NM_021052       | 3012   | A_23_P59045  | 3,05  |
| HIST1H2AM  | NM_003514       | 8336   | A_24_P86389  | 2,19  |
| HIST1H2BH  | NM_003524       | 8345   | A_23_P366216 | 2,01  |
| HIST1H2BK  | NM_080593       | 85236  | A_23_P145238 | 3,02  |
| HIST1H2BL  | NM_003519       | 8340   | A_23_P8013   | 2,02  |
| HIST2H2AA4 | NM_001040874    | 723790 | A_23_P103981 | 6,97  |
| HIST2H2AB  | NM_175065       | 317772 | A_24_P68631  | 2,17  |
| HIST2H2BE  | NM_003528       | 8349   | A_24_P148321 | 6,05  |
| HIST3H2A   | NM_033445       | 92815  | A_23_P149301 | 2,08  |
| HIVEP1     | NM_002114       | 3096   | A_23_P19619  | 3,96  |
| HLA-DRB5   | NM_002125       | 3127   | A_23_P31006  | 1,50  |
| HOMEZ      | NM_020834       | 57594  | A_23_P76829  | -3,17 |
| HOXB13     | NM_006361       | 10481  | A_24_P365015 | -4,16 |
| HOXC13     | NM_017410       | 3229   | A_23_P64808  | 6,37  |
| HRASLS2    | NM_017878       | 54979  | A_23_P105012 | 6,71  |
| HSD11B1L   | NM_198533       | 374875 | A_24_P267552 | 2,41  |
| HSD17B2    | NM_002153       | 3294   | A_23_P118065 | 19,76 |
| HSP90AA1   | NM_001017963; N | 3320   | A_32_P199252 | -3,87 |
| HSPA12B    | NM_052970       | 116835 | A_23_P91334  | -3,52 |
| HSPA5      | NM_005347       | 3309   | A_24_P98411  | 2,20  |
| HSPA8      | NM_006597       | 3312   | A_23_P24594  | -2,75 |
| HSPD1      | NM_002156       | 3329   | A_32_P76091  | -2,35 |
| HTRA1      | NM_002775       | 5654   | A_23_P97990  | 2,88  |
| HYAL1      | NM_007312;NM_1  | 3373   | A_23_P69329  | -5,08 |
| IDH2       | NM_002168       | 3418   | A_23_P129209 | -3,81 |
| IFIH1      | NM_022168       | 64135  | A_23_P68155  | 5,55  |
| IFITM1     | NM_003641       | 8519   | A_23_P72737  | 2,91  |
| IFRD1      | NM_001007245    | 3475   | A_23_P251825 | 3,18  |
| IFT80      | NM_020800       | 57560  | A_24_P255645 | 4,25  |
| IGF2       | NM_000612       | 3481   | A_23_P150609 | 3,02  |
| IGFBP3     | NM_001013398    | 3486   | A_23_P215634 | 7,77  |
| IGFBP7     | NM_001553       | 3490   | A_23_P353035 | 3,81  |
| IKZF2      | NM_001079526    | 22807  | A_32_P114284 | 6,44  |
| IL13       | NM_002188       | 3596   | A_23_P251031 | 6,42  |
| IL15       | NM_172174       | 3600   | A_23_P29953  | 4,89  |
| IL18R1     | NM_003855       | 8809   | A_24_P208567 | 7,15  |
| IL1F10     | NM_032556       | 84639  | A_23_P501713 | 5,55  |
| IL1F9      | NM_019618       | 56300  | A_23_P17053  | 5,83  |



|          |                 |        |              |        |
|----------|-----------------|--------|--------------|--------|
| IL1R2    | NM_004633       | 7850   | A_23_P79398  | 5,76   |
| IL3RA    | NM_002183       | 3563   | A_32_P217750 | 1,76   |
| IL6R     | NM_000565       | 3570   | A_24_P379413 | -1,80  |
| IMPG1    | NM_001563       | 3617   | A_23_P42032  | -5,20  |
| INHBB    | NM_002193       | 3625   | A_23_P153958 | -6,85  |
| INSIG1   | NM_198336       | 3638   | A_23_P22027  | 2,57   |
| IQCE     | NM_152558       | 23288  | A_23_P19852  | 2,10   |
| IQCG     | NM_032263       | 84223  | A_23_P300070 | 4,42   |
| IRAK4    | NM_016123       | 51135  | A_24_P158903 | 3,40   |
| IRF5     | NM_002200       | 3663   | A_23_P500271 | 2,52   |
| IRS2     | NM_003749       | 8660   | A_24_P154037 | 2,96   |
| IRX4     | NM_016358       | 50805  | A_24_P20795  | -2,75  |
| ISM1     | NM_080826       | 140862 | A_32_P186731 | 5,08   |
| ISM2     | NM_199296       | 145501 | A_23_P344125 | -5,00  |
| ITFG1    | NA              | 81533  | A_23_P206526 | 2,94   |
| ITGA2    | NM_002203       | 3673   | A_23_P70161  | -5,63  |
| ITGA5    | NM_002205       | 3678   | A_23_P36562  | -2,82  |
| ITGAV    | NM_002210       | 3685   | A_23_P50907  | 3,65   |
| ITGB8    | NM_002214       | 3696   | A_23_P123060 | 10,05  |
| JAG1     | NM_000214       | 182    | A_23_P210763 | 4,79   |
| JAM3     | NM_032801       | 83700  | A_23_P217998 | -16,91 |
| JPH1     | NM_020647       | 56704  | A_23_P434253 | -7,16  |
| KAAG1    | NM_181337       | 353219 | A_24_P143301 | -7,92  |
| KAL1     | NM_000216       | 3730   | A_23_P429950 | -3,89  |
| KANK4    | NM_181712       | 163782 | A_32_P51237  | -10,16 |
| KBTBD8   | NM_032505       | 84541  | A_23_P431252 | -12,66 |
| KCNC3    | NM_004977       | 3748   | A_23_P101516 | -2,83  |
| KCNC4    | NM_153763       | 3749   | A_23_P12079  | -4,99  |
| KCNIP1   | NM_001034837    | 30820  | A_23_P30554  | 4,84   |
| KCNIP3   | NM_013434       | 30818  | A_23_P356004 | 5,12   |
| KCNJ1    | NM_153767       | 3758   | A_23_P501781 | 6,52   |
| KCNJ13   | NM_002242       | 3769   | A_23_P312752 | 15,38  |
| KCNQ1OT1 | NR_002728       | 10984  | A_32_P41924  | 4,48   |
| KCTD12   | NM_138444       | 115207 | A_23_P377957 | 14,06  |
| KHDRBS2  | NM_152688       | 202559 | A_23_P366453 | 11,91  |
| KIAA0319 | NM_014809       | 9856   | A_23_P168324 | 2,76   |
| KIAA0562 | NM_014704       | 9731   | A_23_P200043 | 2,07   |
| KIAA0895 | NM_015314       | 23366  | A_23_P305205 | 3,87   |
| KIAA0922 | NM_015196       | 23240  | A_23_P257250 | -2,43  |
| KIAA1107 | BC037317        | 23285  | A_32_P98136  | -1,59  |
| KIAA1683 | NM_025249       | 80726  | A_23_P130974 | 3,57   |
| KIAA1919 | NM_153369       | 91749  | A_23_P305100 | -2,08  |
| KLHDC5   | NM_020782       | 57542  | A_24_P645765 | 3,45   |
| KLHDC7B  | NM_138433       | 113730 | A_24_P117410 | 5,49   |
| KLHL14   | NM_020805       | 57565  | A_23_P370830 | 3,45   |
| KLK1     | NM_002257       | 3816   | A_23_P16252  | -3,11  |
| KNG1     | NM_000893       | 3827   | A_23_P212258 | 4,22   |
| KRCC1    | NM_016618       | 51315  | A_23_P56759  | 3,99   |
| KRIT1    | NM_194455       | 889    | A_23_P42848  | 3,57   |
| KRT15    | NM_002275       | 3866   | A_23_P27133  | 11,68  |
| KRT25    | NM_181534       | 147183 | A_23_P15786  | -6,59  |
| KRT32    | NM_002278       | 3882   | A_23_P89601  | 7,51   |
| KRT7     | NM_005556       | 3855   | A_23_P381945 | 3,92   |
| LAMA2    | NM_000426       | 3908   | A_23_P70719  | 4,45   |
| LAMB3    | NM_001017402    | 3914   | A_23_P86012  | 6,03   |
| LAMC2    | NM_005562; NM_C | 3918   | A_23_P201636 | -2,17  |

|              |                 |           |              |        |
|--------------|-----------------|-----------|--------------|--------|
| LAMC3        | NM_006059       | 10319     | A_23_P82979  | -4,06  |
| LAMP3        | NM_014398       | 27074     | A_23_P29773  | 4,94   |
| LARP1B       | NM_018078       | 55132     | A_23_P7253   | 4,40   |
| LCP1         | NM_002298       | 3936      | A_23_P204847 | -3,54  |
| LDHA         | NM_005566       | 3939      | A_23_P47565  | -2,88  |
| LEFTY1       | NM_020997       | 10637     | A_23_P160336 | 2,55   |
| LEMD1        | NM_001001552    | 93273     | A_24_P696761 | 13,67  |
| LEPREL1      | NM_018192       | 55214     | A_23_P69179  | 3,15   |
| LETM2        | NM_144652       | 137994    | A_23_P348264 | -5,36  |
| LGALS3       | NM_002306       | 3958      | A_23_P128919 | -4,09  |
| LGALS7       | NM_002307       | 3963      | A_24_P238250 | -3,89  |
| LGALS7B      | NM_001042507    | 653499    | A_23_P108062 | -2,96  |
| LGALS8       | NM_006499       | 3964      | A_23_P63017  | -2,71  |
| LGR4         | NM_018490       | 55366     | A_32_P17765  | -2,91  |
| LGSN         | NM_016571       | 51557     | A_23_P93169  | 7,06   |
| LIMCH1       | NM_014988       | 22998     | A_23_P83403  | -3,71  |
| LIN7A        | NM_004664       | 8825      | A_23_P99253  | -6,33  |
| LINGO2       | NM_152570       | 158038    | A_23_P157926 | 2,00   |
| LIPC         | NM_000236       | 3990      | A_23_P88559  | -1,72  |
| LIPG         | NM_006033       | 9388      | A_23_P78405  | 4,54   |
| LLGL2        | NM_001015002    | 3993      | A_24_P307869 | -3,72  |
| LOC100128822 | NR_027387       | 100128822 | A_32_P6172   | 2,35   |
| LOC100287049 | XM_002342146    | 100287049 | A_24_P886960 | 2,75   |
| LOC100289230 | XM_002342559    | 100289230 | A_24_P932680 | 4,55   |
| LOC375295    | XM_001716150    | 375295    | A_23_P302787 | -6,64  |
| LOC388630    | XM_371250       | 388630    | A_32_P232214 | -7,93  |
| LOC389458    | NR_015343       | 389458    | A_32_P171143 | 3,47   |
| LOC400891    | NR_027006       | 400891    | A_23_P80200  | 24,19  |
| LOC572558    | NR_015423       | 572558    | A_32_P157208 | 6,77   |
| LOC643037    | XM_926406       | 643037    | A_32_P60635  | 5,86   |
| LOC643201    | BC052945        | 643201    | A_32_P30891  | 4,67   |
| LOC643763    | NR_027378       | 643763    | A_32_P12552  | -2,91  |
| LOC647979    | NR_027451       | 647979    | A_32_P71437  | 4,14   |
| LOC728392    | NM_001162371    | 728392    | A_23_P107351 | 2,95   |
| LOC728431    | XM_001716728    | 728431    | A_32_P128391 | 2,26   |
| LOC728613    | NR_003713       | 728613    | A_24_P59632  | 2,69   |
| LOC730101    | NR_024403       | 730101    | A_24_P500422 | 3,43   |
| LOC730256    | XM_001134398    | 730256    | A_32_P88349  | 3,86   |
| LOC92973     | NR_024006       | 92973     | A_32_P47157  | 9,83   |
| LOX          | NA              | 4015      | A_24_P37903  | 10,55  |
| LPAR1        | NM_057159       | 1902      | A_23_P502879 | 2,74   |
| LPAR3        | AK091731; NM_01 | 23566     | A_32_P108666 | -8,77  |
| LPCAT1       | AK090444        | 79888     | A_24_P941947 | 3,36   |
| LRCH2        | NM_020871       | 57631     | A_23_P73809  | 4,65   |
| LRGUK        | NM_144648       | 136332    | A_24_P346517 | 3,39   |
| LRIG3        | NM_153377       | 121227    | A_23_P47885  | -44,57 |
| LRRC16B      | NM_138360       | 90668     | A_23_P382488 | 2,58   |
| LRRC4B       | NM_001080457    | 94030     | A_23_P419503 | -6,05  |
| LRRC56       | NM_198075       | 115399    | A_23_P368996 | 2,75   |
| LRRC6        | NM_012472       | 23639     | A_23_P112004 | 4,80   |
| LRRN1        | NM_020873       | 57633     | A_24_P240187 | -2,66  |
| LUZP1        | AK074153        | 7798      | A_23_P385084 | -2,18  |
| LXN          | NM_020169       | 56925     | A_23_P6674   | -2,08  |
| MAFA         | NM_201589       | 389692    | A_24_P127719 | -2,79  |
| MAGI2        | NM_012301       | 9863      | A_23_P21376  | 4,64   |
| MAGOHB       | NM_018048       | 55110     | A_24_P330112 | 3,83   |

|            |                 |        |              |        |
|------------|-----------------|--------|--------------|--------|
| MAL        | NM_002371       | 4118   | A_23_P17134  | 4,70   |
| MANEAL     | NM_001031740    | 149175 | A_23_P391228 | 3,15   |
| MAOB       | NM_000898       | 4129   | A_23_P85008  | -6,01  |
| MAP3K1     | NM_005921       | 4214   | A_23_P41796  | 3,20   |
| MAP3K4     | NM_005922       | 4216   | A_23_P42096  | -2,03  |
| MAP4K2     | NM_004579       | 5871   | A_24_P287075 | -3,42  |
| MARCH3     | NM_178450       | 115123 | A_23_P321511 | 2,00   |
| MARCKS     | NM_002356       | 4082   | A_23_P214222 | -4,46  |
| MATK       | NM_139355       | 4145   | A_23_P50678  | -4,76  |
| MATN3      | NM_002381       | 4148   | A_23_P102058 | -9,21  |
| MB         | NM_203377       | 4151   | A_23_P6433   | 4,68   |
| MBNL3      | NM_133486       | 55796  | A_23_P385851 | -7,76  |
| MC1R       | NM_002386       | 4157   | A_23_P329271 | 2,90   |
| MCCC1      | NM_020166       | 56922  | A_23_P58036  | 2,14   |
| MCF2       | NM_005369       | 4168   | A_23_P45536  | -2,49  |
| MCHR2      | NM_001040179    | 84539  | A_24_P98006  | -2,07  |
| MCM10      | NM_182751       | 55388  | A_23_P161474 | -2,81  |
| MCTP1      | NM_024717       | 79772  | A_23_P133293 | 19,04  |
| MEIS3      | NM_001009813    | 56917  | A_23_P78795  | -5,19  |
| MET        | NM_000245       | 4233   | A_23_P145844 | -2,15  |
| MFAP5      | NM_003480       | 8076   | A_23_P87700  | -91,67 |
| MFHAS1     | NM_004225       | 9258   | A_23_P112078 | -3,97  |
| MFNG       | NM_002405       | 4242   | A_24_P224926 | 2,25   |
| MGAT3      | NM_002409       | 4248   | A_24_P245838 | 8,27   |
| MGST1      | NM_145791       | 4257   | A_23_P36658  | -3,93  |
| MID1       | NM_000381; NM_0 | 4281   | A_32_P128656 | 12,60  |
| MIOS       | AK096829        | 54468  | A_24_P346388 | 4,04   |
| MKI67      | NM_002417       | 4288   | A_24_P346855 | -4,63  |
| MMP7       | NM_002423       | 4316   | A_23_P52761  | -19,28 |
| MORN5      | NM_198469       | 254956 | A_24_P401491 | 8,05   |
| MOSPD1     | NM_019556       | 56180  | A_23_P73835  | 3,05   |
| MR1        | NM_001531       | 3140   | A_23_P431939 | 2,30   |
| MSH4       | NM_002440       | 4438   | A_23_P74068  | 5,95   |
| MSX2       | NM_002449       | 4488   | A_24_P132006 | -4,98  |
| MSX2P1     | NR_002307       | 55545  | A_32_P169179 | -4,57  |
| MTMR2      | NM_201278       | 8898   | A_23_P64019  | -2,03  |
| MTMR6      | NM_004685       | 9107   | A_23_P25515  | 3,08   |
| MUC20      | NM_152673       | 200958 | A_23_P92225  | 3,50   |
| MVK        | NM_000431       | 4598   | A_24_P372901 | -3,94  |
| MXRA8      | NM_032348       | 54587  | A_23_P32444  | 5,23   |
| MYB        | NM_005375       | 4602   | A_23_P31073  | -3,45  |
| MYH15      | NM_014981       | 22989  | A_24_P11900  | 4,14   |
| MYL4       | NM_002476       | 4635   | A_24_P188218 | -2,72  |
| MYO10      | NM_012334       | 4651   | A_23_P7596   | -3,11  |
| MYOD1      | NM_002478       | 4654   | A_24_P30257  | -2,59  |
| MYT1       | NM_004535       | 4661   | A_23_P210835 | 3,43   |
| N4BP2L1    | NM_052818       | 90634  | A_23_P76658  | 9,53   |
| NAB1       | NM_005966       | 4664   | A_24_P191417 | 3,68   |
| NAIP       | NM_004536       | 4671   | A_24_P72139  | 3,90   |
| NAP1L5     | NM_153757       | 266812 | A_23_P144369 | -2,44  |
| NBR2       | NR_003108       | 10230  | A_23_P4160   | 2,56   |
| NCF1       | NM_000265       | 653361 | A_32_P116203 | 2,47   |
| NCF2       | NM_000433       | 4688   | A_23_P138194 | -8,36  |
| NCOA7      | NM_181782       | 135112 | A_23_P156957 | -4,82  |
| NCR3       | NM_147130       | 259197 | A_23_P251881 | 3,95   |
| NCRNA00189 | NR_027072       | 193629 | A_32_P111306 | 2,05   |

|         |                 |        |              |        |
|---------|-----------------|--------|--------------|--------|
| NDUFAF4 | NM_014165       | 29078  | A_24_P171983 | -3,07  |
| NEDD4   | NM_198400       | 4734   | A_23_P331379 | 3,28   |
| NELL2   | NM_006159       | 4753   | A_23_P10025  | -6,19  |
| NETO2   | NM_018092       | 81831  | A_32_P77989  | -6,27  |
| NEUROG2 | NM_024019       | 63973  | A_32_P438767 | -3,83  |
| NFATC1  | NM_172387       | 4772   | A_23_P300150 | 3,98   |
| NFE2    | NM_006163       | 4778   | A_23_P13753  | -1,48  |
| NFIB    | NM_005596       | 4781   | A_23_P216448 | 3,53   |
| NFKBIZ  | NM_031419       | 64332  | A_23_P212089 | 6,23   |
| NKX2-8  | NM_014360       | 26257  | A_24_P253293 | -2,69  |
| NKX6-3  | AK057898        | 157848 | A_23_P402804 | 2,33   |
| NLGN1   | NM_014932       | 22871  | A_23_P18123  | 8,47   |
| NMU     | NM_006681       | 10874  | A_23_P69537  | -16,64 |
| NOV     | NM_002514       | 4856   | A_23_P82929  | 17,49  |
| NOXO1   | NM_144603       | 124056 | A_23_P413051 | 2,15   |
| NPAS1   | NM_002517       | 4861   | A_23_P27734  | -5,00  |
| NPAS2   | NM_002518       | 4862   | A_23_P218597 | -2,58  |
| NPDC1   | NM_015392       | 56654  | A_23_P146572 | 2,15   |
| NRIP1   | NM_003489       | 8204   | A_23_P211007 | 3,89   |
| NRSN2   | NM_024958       | 80023  | A_24_P416837 | -2,79  |
| NRTN    | NM_004558       | 4902   | A_23_P90359  | 3,16   |
| NTN5    | NM_145807       | 126147 | A_32_P394951 | 5,67   |
| NTNG2   | NM_032536       | 84628  | A_23_P423331 | 2,89   |
| NUDT14  | NM_177533       | 256281 | A_23_P414978 | -3,25  |
| NUP210  | NM_024923       | 23225  | A_23_P212159 | -3,59  |
| OAS3    | NM_006187       | 4940   | A_23_P47955  | 4,49   |
| OAZ3    | NM_016178       | 51686  | A_32_P226078 | 2,97   |
| ODF3L2  | NM_182577       | 284451 | A_32_P337508 | -2,73  |
| ORAI1   | NM_032790       | 84876  | A_23_P258837 | -3,97  |
| OTUB2   | NM_023112       | 78990  | A_24_P124875 | -2,69  |
| PAIP2B  | NM_020459       | 400961 | A_23_P301053 | 2,60   |
| PAPPA   | NM_002581       | 5069   | A_23_P216742 | -8,70  |
| PAQR8   | NM_133367       | 85315  | A_23_P214281 | -6,74  |
| PARP8   | NM_024615; XM_C | 79668  | A_23_P121898 | 3,70   |
| PAX6    | NM_000280       | 5080   | A_23_P1823   | 3,80   |
| PBX1    | NM_002585       | 5087   | A_23_P62953  | 6,47   |
| PCDH7   | NM_002589       | 5099   | A_23_P310921 | 8,19   |
| PCDH9   | NM_020403       | 5101   | A_24_P187218 | 7,73   |
| PCGF5   | NM_032373       | 84333  | A_24_P880043 | 5,62   |
| PCMT1   | NM_005389       | 5110   | A_24_P247608 | -2,15  |
| PCOLCE2 | NM_013363       | 26577  | A_23_P57709  | 2,63   |
| PCYT2   | NM_002861       | 5833   | A_24_P404245 | -3,12  |
| PDE1A   | NM_001003683    | 5136   | A_23_P79272  | -11,57 |
| PDE4D   | NM_006203       | 5144   | A_24_P944519 | 3,93   |
| PDE4DIP | NM_001002811    | 9659   | A_23_P200801 | 2,92   |
| PDE7B   | NM_018945       | 27115  | A_23_P59338  | 3,99   |
| PDE9A   | NM_002606       | 5152   | A_23_P29096  | 3,95   |
| PDK2    | NM_002611       | 5164   | A_23_P207517 | -2,98  |
| PDLIM3  | NM_014476       | 27295  | A_23_P110403 | 13,17  |
| PDLIM4  | NM_003687       | 8572   | A_23_P144796 | -2,88  |
| PDLIM5  | NM_006457       | 10611  | A_24_P174641 | -3,33  |
| PDZD2   | NM_178140       | 23037  | A_23_P7402   | 3,48   |
| PEX10   | NM_002617       | 5192   | A_24_P173727 | -2,89  |
| PFKFB4  | NM_004567       | 5210   | A_24_P362904 | -5,86  |
| PFKL    | NM_002626       | 5211   | A_23_P29079  | -3,02  |
| PGM5    | NM_021965       | 5239   | A_23_P10956  | 3,00   |

|           |              |        |              |        |
|-----------|--------------|--------|--------------|--------|
| PHF2      | NM_005392    | 5253   | A_23_P502371 | 2,15   |
| PHLDA1    | NM_007350    | 22822  | A_23_P76450  | 4,39   |
| PHOSPHO1  | NM_178500    | 162466 | A_23_P49792  | -4,27  |
| PI3       | NM_002638    | 5266   | A_23_P210465 | -6,53  |
| PIGT      | NM_015937    | 51604  | A_24_P40165  | 2,01   |
| PIK3R1    | NM_181523    | 5295   | A_23_P144980 | 4,05   |
| PIP5K1B   | NM_003558    | 8395   | A_32_P465742 | 12,91  |
| PITPNA    | NM_006224    | 5306   | A_24_P942354 | 2,05   |
| PKP2      | NM_004572    | 5318   | A_23_P162466 | -3,64  |
| PLA2G4C   | NM_003706    | 8605   | A_23_P50508  | 7,22   |
| PLAC8     | NM_016619    | 51316  | A_23_P81219  | -5,04  |
| PLAGL1    | NM_006718    | 5325   | A_23_P8175   | -4,73  |
| PLAT      | NM_000930    | 5327   | A_23_P82868  | -20,57 |
| PLCD1     | NM_006225    | 5333   | A_23_P80739  | -2,62  |
| PLCD3     | NM_133373    | 113026 | A_23_P351757 | -4,59  |
| PLCXD3    | NM_001005473 | 345557 | A_32_P119033 | 34,16  |
| PLEKHH2   | NM_172069    | 130271 | A_23_P384748 | 6,48   |
| PLOD2     | NM_182943    | 5352   | A_23_P211910 | 13,92  |
| PLSCR4    | NM_020353    | 57088  | A_23_P91910  | 6,94   |
| PLXNA2    | NM_025179    | 5362   | A_23_P46618  | -6,76  |
| PLXNA4    | NM_020911    | 91584  | A_24_P265051 | 13,27  |
| PM20D2    | NM_001010853 | 135293 | A_32_P86118  | -3,28  |
| PNKP      | NM_007254    | 11284  | A_23_P164883 | -3,76  |
| POLK      | NM_016218    | 51426  | A_24_P303160 | 4,56   |
| POLR3F    | NM_006466    | 10621  | A_23_P166122 | 2,90   |
| PPARGC1A  | NM_013261    | 10891  | A_23_P18447  | -2,51  |
| PPP1R1A   | NM_006741    | 5502   | A_23_P53417  | 5,62   |
| PPP2R2C   | NM_020416    | 5522   | A_24_P3415   | 2,67   |
| PPWD1     | NM_015342    | 23398  | A_23_P110433 | 3,96   |
| PRICKLE2  | NM_198859    | 166336 | A_24_P152188 | -5,17  |
| PRNP      | NM_000311    | 5621   | A_23_P109143 | 2,74   |
| PROCA1    | NM_152465    | 147011 | A_23_P427148 | 2,72   |
| PROS1     | NM_000313    | 5627   | A_23_P73114  | -1,21  |
| PRR5L     | NM_024841    | 79899  | A_23_P116512 | 6,71   |
| PSCA      | NM_005672    | 8000   | A_23_P71379  | 3,44   |
| PSKH1     | NM_006742    | 5681   | A_23_P390596 | 2,22   |
| PSMB1     | NM_002793    | 5689   | A_23_P156531 | -2,13  |
| PSMB9     | NM_002800    | 5698   | A_23_P111000 | 3,98   |
| PTGES     | NM_004878    | 9536   | A_24_P403417 | -7,58  |
| PTGIS     | NM_000961    | 5740   | A_24_P48723  | 11,42  |
| PTP4A1    | NM_003463    | 7803   | A_23_P81770  | 3,49   |
| PTPRD     | NM_002839    | 5789   | A_23_P252132 | -3,26  |
| PTPRM     | NM_002845    | 5797   | A_23_P159255 | 2,93   |
| PURG      | NM_001015508 | 29942  | A_24_P42446  | 8,52   |
| QKI       | NM_206855    | 9444   | A_24_P940426 | -5,34  |
| RAB11FIP1 | NM_001002233 | 80223  | A_23_P31873  | 3,95   |
| RAB27B    | NM_004163    | 5874   | A_23_P107612 | 3,84   |
| RAB30     | NM_014488    | 27314  | A_24_P167338 | -2,76  |
| RAB3GAP2  | NM_012414    | 25782  | A_24_P127928 | 3,64   |
| RABL3     | NM_173825    | 285282 | A_23_P158349 | -2,42  |
| RAP2B     | NM_002886    | 5912   | A_24_P123052 | 3,13   |
| RAPH1     | NM_213589    | 65059  | A_24_P929570 | -3,56  |
| RASGRP3   | NM_170672    | 25780  | A_24_P54390  | 4,49   |
| RASSF8    | NM_001164746 | 11228  | A_24_P407224 | 6,50   |
| RASSF9    | NM_005447    | 9182   | A_24_P199251 | 5,79   |
| RBM11     | NM_144770    | 54033  | A_23_P342000 | -5,87  |

|               |                 |        |              |        |
|---------------|-----------------|--------|--------------|--------|
| RBP7          | NM_052960       | 116362 | A_24_P165423 | -3,48  |
| RFPL2         | NM_006605       | 10739  | A_23_P254434 | 7,57   |
| RFX2          | NM_000635       | 5990   | A_23_P502350 | 2,74   |
| RGNEF         | NM_001080479    | 64283  | A_24_P177932 | -2,64  |
| RGS3          | NM_134427       | 5998   | A_23_P219197 | 2,66   |
| RGS5          | NM_003617       | 8490   | A_23_P46045  | 19,00  |
| RHOBTB1       | NM_014836       | 9886   | A_24_P158536 | 3,64   |
| RHOBTB3       | NM_014899       | 22836  | A_23_P92710  | -5,37  |
| RHOU          | NM_021205       | 58480  | A_23_P114814 | 2,85   |
| RIBC1         | NM_001031745    | 158787 | A_23_P73667  | 2,10   |
| RIBC2         | NM_015653       | 26150  | A_23_P166526 | 4,37   |
| RIMBP3        | NM_015672       | 85376  | A_23_P154962 | 4,42   |
| RIMKLA        | NM_173642       | 284716 | A_23_P349406 | -5,34  |
| RNASSET2      | NM_003730       | 8635   | A_24_P289471 | -7,32  |
| RND3          | NM_005168       | 390    | A_23_P142849 | 5,85   |
| RNF112        | NM_007148       | 7732   | A_23_P107116 | 3,96   |
| RNF122        | NM_024787       | 79845  | A_23_P134744 | 2,10   |
| RNF125        | AK027134        | 54941  | A_24_P472055 | -8,68  |
| RNF141        | NM_016422       | 50862  | A_23_P139066 | -2,37  |
| ROBO1         | NM_133631       | 6091   | A_24_P77432  | -5,36  |
| RP11-45B20.2  | NM_001007537    | 387911 | A_23_P105886 | 5,70   |
| RP11-631M21.2 | NM_001164154    | 347688 | A_32_P16315  | 4,73   |
| RP1-21O18.1   | NM_015209       | 23254  | A_24_P246573 | 2,01   |
| RP5-1022P6.2  | NM_019593       | 56261  | A_23_P353704 | 3,92   |
| RP6-213H19.1  | NM_016542       | 51765  | A_23_P32414  | -15,14 |
| RPGR          | NM_000328       | 6103   | A_23_P136964 | 4,18   |
| RPL23AP32     | NR_002229       | 56969  | A_23_P108932 | 4,78   |
| RRAD          | NM_004165       | 6236   | A_23_P88849  | 2,51   |
| RRAGD         | NM_021244       | 58528  | A_23_P133691 | -1,61  |
| RRM2          | NM_001034       | 6241   | A_24_P225616 | -4,96  |
| RSPH1         | NM_080860       | 89765  | A_23_P102950 | 6,48   |
| RUNDC3B       | NM_138290       | 154661 | A_23_P111724 | 15,86  |
| RXFP1         | NM_021634       | 59350  | A_23_P433050 | -5,37  |
| S100A16       | NM_080388       | 140576 | A_23_P147918 | -5,88  |
| S100P         | NM_005980       | 6286   | A_23_P58266  | -2,14  |
| S1PR1         | NM_001400       | 1901   | A_23_P404481 | 49,64  |
| S1PR4         | NM_003775       | 8698   | A_23_P119502 | -5,09  |
| SAT1          | NM_002970       | 6303   | A_23_P137016 | 1,19   |
| SCARB1        | NM_005505       | 949    | A_23_P369201 | -4,45  |
| SCD           | AF132203        | 6319   | A_32_P231415 | 4,20   |
| SCGB2A1       | CB959193; NM_00 | 4246   | A_23_P139166 | -1,78  |
| SCRT2         | NM_033129       | 85508  | A_24_P117782 | -2,75  |
| SDC3          | NM_014654       | 9672   | A_23_P74887  | -3,56  |
| SDR42E1       | NM_145168       | 93517  | A_23_P129458 | 3,87   |
| SEMA3D        | NM_152754       | 223117 | A_32_P29118  | 5,03   |
| SEMA5B        | NM_001031702    | 54437  | A_23_P121374 | 3,78   |
| SEMA6A        | NM_020796       | 57556  | A_24_P213478 | -2,34  |
| SEPP1         | NM_005410       | 6414   | A_23_P121926 | -2,67  |
| SERF2         | NM_001018108    | 10169  | A_24_P313334 | 2,26   |
| SERPINA1      | NM_001002236    | 5265   | A_23_P218111 | -6,08  |
| SERPINI1      | NM_005025       | 5274   | A_23_P166929 | 4,67   |
| SETD7         | NM_030648       | 80854  | A_23_P80966  | 3,65   |
| SFN           | NM_006142       | 2810   | A_23_P63254  | -2,92  |
| SFRP1         | NM_003012       | 6422   | A_23_P10121  | 5,66   |
| SFRS13B       | NM_080743       | 135295 | A_32_P456318 | -3,09  |
| SFTA2         | NM_205854       | 389376 | A_24_P149248 | -3,86  |

|          |              |        |              |        |
|----------|--------------|--------|--------------|--------|
| SGK2     | NM_170693    | 10110  | A_23_P131801 | 2,01   |
| SH3D20   | NM_174919    | 201176 | A_23_P401626 | -2,98  |
| SH3GLB2  | NM_020145    | 56904  | A_23_P216996 | -2,97  |
| SHBG     | NM_001040    | 6462   | A_23_P207089 | 2,86   |
| SHCBP1   | NM_024745    | 79801  | A_32_P96719  | -3,79  |
| SHF      | NM_138356    | 90525  | A_32_P183904 | -3,25  |
| SHISA3   | NM_001080505 | 152573 | A_23_P41476  | -20,35 |
| SHISA9   | NM_001145205 | 729993 | A_24_P160868 | -3,07  |
| SIGLEC8  | NM_014442    | 27181  | A_24_P40001  | -3,31  |
| SIRPA    | NM_001040022 | 140885 | A_23_P210708 | 2,43   |
| SKP2     | NM_032637    | 6502   | A_23_P156310 | -3,70  |
| SLC12A3  | NM_000339    | 6559   | A_23_P77653  | -6,95  |
| SLC14A2  | AK074236     | 8170   | A_24_P136471 | -6,62  |
| SLC16A10 | NM_018593    | 117247 | A_24_P98047  | -12,15 |
| SLC16A12 | NM_213606    | 387700 | A_24_P13024  | -7,68  |
| SLC17A1  | NM_005074    | 6568   | A_23_P42189  | 7,61   |
| SLC17A4  | NM_005495    | 10050  | A_23_P357270 | -2,61  |
| SLC17A8  | NM_139319    | 246213 | A_23_P159076 | -1,19  |
| SLC1A3   | NM_004172    | 6507   | A_23_P250963 | -8,27  |
| SLC22A1  | NM_153187    | 6580   | A_23_P145569 | -3,15  |
| SLC22A3  | NM_021977    | 6581   | A_23_P19733  | -2,83  |
| SLC23A3  | NM_144712    | 151295 | A_23_P28246  | 6,05   |
| SLC25A27 | NM_004277    | 9481   | A_23_P81721  | 8,13   |
| SLC25A35 | NM_201520    | 399512 | A_23_P366726 | 2,77   |
| SLC28A1  | NM_004213    | 9154   | A_23_P14667  | 2,03   |
| SLC29A4  | NM_001040661 | 222962 | A_23_P168551 | -3,24  |
| SLC35F3  | NM_173508    | 148641 | A_23_P422212 | -4,13  |
| SLC39A8  | NM_022154    | 64116  | A_23_P41424  | -4,49  |
| SLC3A1   | NM_000341    | 6519   | A_24_P217234 | -3,42  |
| SLC3A2   | NM_001012661 | 6520   | A_23_P75811  | -3,56  |
| SLC40A1  | NM_014585    | 30061  | A_23_P102391 | -2,41  |
| SLC41A1  | NM_173854    | 254428 | A_24_P122732 | 2,01   |
| SLC44A4  | NM_025257    | 80736  | A_23_P93349  | -4,33  |
| SLC6A10P | NR_003083    | 386757 | A_24_P15621  | -6,69  |
| SLC6A8   | NM_005629    | 6535   | A_23_P159937 | -4,16  |
| SLC7A8   | NM_182728    | 23428  | A_23_P205489 | -1,86  |
| SLC9A2   | NM_003048    | 6549   | A_23_P5536   | -4,26  |
| SLFN5    | NM_144975    | 162394 | A_23_P402899 | 10,40  |
| SLPI     | NM_003064    | 6590   | A_23_P91230  | 7,63   |
| SMAD9    | BM802662     | 4093   | A_24_P655849 | -4,75  |
| SMPDL3A  | NM_006714    | 10924  | A_23_P72117  | -1,63  |
| SMS      | NM_004595    | 6611   | A_24_P305764 | -2,16  |
| SMTNL2   | NM_198501    | 342527 | A_24_P555066 | 8,78   |
| SNCG     | NM_003087    | 6623   | A_23_P251293 | -4,08  |
| SNIP     | NM_025248    | 80725  | A_32_P201530 | 7,32   |
| SNTA1    | NM_003098    | 6640   | A_24_P322709 | -3,59  |
| SOLH     | BC032648     | 6650   | A_24_P928639 | -3,34  |
| SOX13    | NM_005686    | 9580   | A_23_P85703  | -2,75  |
| SOX18    | NM_018419    | 54345  | A_23_P255418 | -2,63  |
| SOX3     | NM_005634    | 6658   | A_23_P85218  | -3,89  |
| SOX6     | NM_017508    | 55553  | A_24_P912021 | 5,24   |
| SOX9     | NM_000346    | 6662   | A_23_P26847  | 9,83   |
| SP140    | NM_007237    | 11262  | A_24_P328504 | 2,84   |
| SP140L   | NM_138402    | 93349  | A_23_P337753 | 3,69   |
| SPA17    | NM_017425    | 53340  | A_23_P104876 | 2,32   |
| SPAG4    | NM_003116    | 6676   | A_23_P132027 | -3,54  |

|            |              |           |              |        |
|------------|--------------|-----------|--------------|--------|
| SPANXB2    | NM_145664    | 100133171 | A_24_P305784 | 1,58   |
| SPANXD     | NM_032417    | 64648     | A_23_P73501  | -1,44  |
| SPARCL1    | NM_004684    | 8404      | A_23_P113351 | 4,73   |
| SPATA17    | NM_138796    | 128153    | A_23_P346912 | 5,60   |
| SPATA18    | NM_145263    | 132671    | A_24_P345958 | 2,16   |
| SPATS2L    | NM_015535    | 26010     | A_23_P131255 | -3,24  |
| SPC25      | NM_020675    | 57405     | A_23_P51085  | -4,16  |
| SPDYA      | NM_001008779 | 245711    | A_23_P425579 | 4,62   |
| SPDYE1     | NM_175064    | 285955    | A_24_P414873 | 2,89   |
| SPDYE3     | NM_001004351 | 441272    | A_32_P216734 | 3,22   |
| SPDYE5     | NM_001099435 | 442590    | A_32_P177040 | 4,06   |
| SPIN3      | NM_001010862 | 169981    | A_24_P494454 | 3,41   |
| SPON2      | NM_012445    | 10417     | A_23_P121533 | 3,18   |
| SPTLC3     | NM_018327    | 55304     | A_24_P49260  | 18,38  |
| SRGN       | NM_002727    | 5552      | A_23_P86653  | 12,61  |
| SSPN       | NM_005086    | 8082      | A_23_P203920 | 6,47   |
| ST8SIA4    | NM_005668    | 7903      | A_23_P361984 | 5,19   |
| STAMBPL1   | NM_020799    | 57559     | A_23_P385322 | 5,55   |
| STARD4     | NM_139164    | 134429    | A_23_P327519 | -2,29  |
| STAT1      | NM_007315    | 6772      | A_23_P56630  | 3,37   |
| STEAP2     | NM_152999    | 261729    | A_23_P428260 | 5,47   |
| STK17B     | NM_004226    | 9262      | A_23_P154367 | -3,36  |
| STK31      | NM_032944    | 56164     | A_23_P42784  | 5,98   |
| STK32B     | NM_018401    | 55351     | A_24_P171690 | -2,63  |
| STOX2      | NM_020225    | 56977     | A_23_P251364 | 6,18   |
| STX6       | AK056657     | 10228     | A_23_P331992 | 2,06   |
| STXBP6     | NM_014178    | 29091     | A_23_P205713 | 3,10   |
| SULF2      | NM_018837    | 55959     | A_23_P154605 | 2,20   |
| SUNC1      | NM_001030019 | 256979    | A_23_P329962 | -2,53  |
| SUSD3      | NM_145006    | 203328    | A_23_P401076 | -4,53  |
| SUSD4      | NM_017982    | 55061     | A_24_P259607 | 5,80   |
| SYNCRIP    | NM_001159677 | 10492     | A_24_P940599 | -3,36  |
| TATDN2     | BC009749     | 9797      | A_24_P592318 | -3,00  |
| TBX2       | NM_005994    | 6909      | A_23_P164451 | -4,61  |
| tcag7.1307 | NR_024394    | 154822    | A_32_P200303 | 1,41   |
| TCF4       | NM_001083962 | 6925      | A_24_P931428 | 6,10   |
| TCP1       | NM_030752    | 6950      | A_23_P122782 | -2,88  |
| TCP11L2    | NM_152772    | 255394    | A_23_P419107 | 6,87   |
| TCTN1      | NM_024549    | 79600     | A_23_P76402  | 2,31   |
| TEF        | NM_003216    | 7008      | A_24_P151582 | 2,46   |
| TEX15      | NM_031271    | 56154     | A_23_P123308 | 7,90   |
| TFPI2      | AK129833     | 7980      | A_24_P95070  | 18,53  |
| TGFB2      | NM_001135599 | 7042      | A_24_P148261 | 5,85   |
| TGM2       | NM_198951    | 7052      | A_24_P923251 | -4,67  |
| THAP2      | NM_031435    | 83591     | A_23_P105382 | 3,46   |
| THAP5      | NM_182529    | 168451    | A_32_P445775 | 4,00   |
| THBS3      | NM_007112    | 7059      | A_23_P201047 | 6,34   |
| THNSL2     | NM_018271    | 55258     | A_23_P259207 | 2,96   |
| THRA       | NM_003250    | 7067      | A_23_P207742 | 2,59   |
| THSD7A     | NM_015204    | 221981    | A_24_P400324 | -14,89 |
| TJP2       | NM_004817    | 9414      | A_23_P9293   | -2,27  |
| TLN2       | NM_015059    | 83660     | A_32_P170406 | -3,23  |
| TLR3       | NM_003265    | 7098      | A_23_P29922  | 12,17  |
| TM4SF1     | NM_014220    | 4071      | A_32_P231617 | -9,36  |
| TM4SF4     | NM_004617    | 7104      | A_23_P252432 | 29,50  |
| TM7SF2     | NM_003273    | 7108      | A_23_P127426 | 2,89   |



|           |              |           |              |        |
|-----------|--------------|-----------|--------------|--------|
| TMCC3     | NM_020698    | 57458     | A_23_P87853  | -3,49  |
| TMEFF1    | NM_003692    | 8577      | A_24_P274987 | 7,71   |
| TMEM133   | NM_032021    | 83935     | A_23_P150325 | -1,46  |
| TMEM171   | NM_173490    | 134285    | A_32_P110390 | -3,44  |
| TMEM33    | NM_018126    | 55161     | A_24_P191790 | -2,50  |
| TMEM47    | NM_031442    | 83604     | A_24_P143171 | -5,64  |
| TMEM80    | NM_001042463 | 283232    | A_23_P332960 | 2,11   |
| TMEM8B    | NM_001042590 | 51754     | A_24_P317827 | 2,22   |
| TMIE      | NM_147196    | 259236    | A_24_P234462 | 2,91   |
| TMSB15A   | NM_021992    | 11013     | A_23_P137173 | -2,11  |
| TMSB4X    | NM_021109    | 7114      | A_24_P374516 | 3,10   |
| TNF       | NM_000594    | 7124      | A_23_P376488 | 9,43   |
| TNFAIP8L3 | NM_207381    | 388121    | A_32_P59010  | 2,58   |
| TNFRSF6B  | NM_032945    | 8771      | A_23_P218646 | 7,23   |
| TNNC2     | NM_003279    | 7125      | A_23_P131825 | 3,08   |
| TOX3      | NM_001146188 | 27324     | A_23_P54681  | 4,89   |
| TP53I11   | AF010315     | 9537      | A_23_P368028 | -3,22  |
| TPD52L1   | NM_001003395 | 7164      | A_23_P31143  | -7,30  |
| TPM1      | NM_001018004 | 7168      | A_23_P391586 | 2,62   |
| TPO       | NM_000547    | 7173      | A_24_P257224 | 6,86   |
| TPPP3     | NM_016140    | 51673     | A_23_P26386  | 7,93   |
| TRAF3IP2  | NM_147686    | 10758     | A_23_P110879 | -2,32  |
| TRAM1L1   | NM_152402    | 133022    | A_23_P18518  | 3,92   |
| TRIM2     | NM_015271    | 23321     | A_23_P213141 | -6,40  |
| TRIM22    | NM_006074    | 10346     | A_24_P172481 | -1,55  |
| TRIM23    | NM_033228    | 373       | A_23_P167384 | 4,73   |
| TRIM34    | NM_130390    | 53840     | A_23_P124190 | 6,62   |
| TRIM6     | NM_001003818 | 117854    | A_23_P33673  | -28,67 |
| TRPC2     | NR_002720    | 7221      | A_23_P169873 | -3,21  |
| TSHZ1     | NM_005786    | 10194     | A_23_P27381  | 3,81   |
| TSPAN10   | NM_031945    | 83882     | A_24_P213643 | -2,68  |
| TSPAN19   | NM_001100917 | 144448    | A_23_P2322   | 9,62   |
| TSPAN33   | NM_178562    | 340348    | A_24_P365901 | 2,24   |
| TSPAN5    | AK055659     | 10098     | A_23_P61886  | 2,98   |
| TST       | NM_003312    | 7263      | A_23_P29248  | 2,05   |
| TTC18     | NM_145170    | 118491    | A_23_P326931 | 5,69   |
| TTC25     | NM_031421    | 83538     | A_23_P73150  | 6,90   |
| TTN       | NM_133378    | 7273      | A_23_P85269  | 2,46   |
| TTR       | NM_000371    | 7276      | A_23_P130333 | 6,67   |
| TUBA8     | NM_018943    | 51807     | A_24_P160104 | 2,10   |
| TUBAL3    | NM_024803    | 79861     | A_23_P95851  | -3,84  |
| TUG1      | NR_002323    | 55000     | A_23_P68868  | 3,75   |
| TXNDC5    | NM_030810    | 81567     | A_23_P168229 | -2,09  |
| TXNDC6    | NM_178130    | 347736    | A_23_P212672 | 2,23   |
| TXNIP     | NM_006472    | 10628     | A_23_P97700  | 3,75   |
| UACA      | NM_001008224 | 55075     | A_23_P360340 | 5,58   |
| UBE2I     | BC064492     | 7329      | A_24_P227993 | 2,40   |
| UBE2J1    | NM_016021    | 51465     | A_23_P214185 | -2,06  |
| UBXN10    | NM_152376    | 127733    | A_23_P85664  | 8,74   |
| UHMK1     | AK026668     | 127933    | A_32_P84389  | 3,80   |
| UHRF1     | NM_013282    | 29128     | A_23_P208880 | -2,25  |
| UNC13A    | NM_001080421 | 23025     | A_23_P365494 | 2,84   |
| UNQ3028   | AY358789     | 100131826 | A_24_P934008 | -3,71  |
| UPK1B     | NM_006952    | 7348      | A_24_P200219 | -11,30 |
| USP20     | NM_001008563 | 10868     | A_23_P217028 | 2,25   |
| USP36     | AB040886     | 57602     | A_23_P352957 | 2,65   |

|         |              |        |              |        |
|---------|--------------|--------|--------------|--------|
| VCAN    | NM_004385    | 1462   | A_23_P144959 | 4,24   |
| VDR     | NM_001017535 | 7421   | A_23_P162589 | -7,46  |
| VMO1    | NM_182566    | 284013 | A_23_P55356  | 2,17   |
| VPS26B  | NM_052875    | 112936 | A_23_P52903  | -3,12  |
| VSIG10  | NM_019086    | 54621  | A_23_P72059  | 2,02   |
| VTA1    | NM_016485    | 51534  | A_23_P42368  | -2,16  |
| VTCN1   | NM_024626    | 79679  | A_23_P518    | 2,65   |
| VWA5B2  | NM_138345    | 90113  | A_24_P152881 | -2,89  |
| WBSCR28 | NM_182504    | 135886 | A_23_P418274 | 6,22   |
| WDR31   | NM_001012361 | 114987 | A_24_P6674   | 4,62   |
| WDR52   | NM_001164496 | 55779  | A_23_P110090 | 5,37   |
| WDR5B   | NM_019069    | 54554  | A_23_P92184  | 2,68   |
| WDR69   | NM_178821    | 164781 | A_23_P28466  | -6,32  |
| WIBG    | BC009627     | 84305  | A_24_P917612 | 2,04   |
| WNT2B   | NM_004185    | 7482   | A_23_P138352 | -2,24  |
| WNT6    | NM_006522    | 7475   | A_23_P119916 | 7,78   |
| WNT7A   | NM_004625    | 7476   | A_23_P258410 | -6,42  |
| WSCD1   | NM_015253    | 23302  | A_24_P942493 | -17,56 |
| XPOT    | NM_007235    | 11260  | A_23_P340722 | 2,83   |
| XRCC4   | NM_022550    | 7518   | A_23_P122174 | 3,79   |
| ZADH2   | NM_175907    | 284273 | A_23_P375476 | 3,23   |
| ZBTB24  | NM_014797    | 9841   | A_23_P134147 | -2,39  |
| ZC3H6   | NM_198581    | 376940 | A_24_P826348 | 4,83   |
| ZCCHC14 | NM_015144    | 23174  | A_24_P176484 | 2,60   |
| ZCWPW1  | NM_017984    | 55063  | A_23_P70897  | 2,72   |
| ZDBF2   | NM_020923    | 57683  | A_32_P68504  | 7,20   |
| ZDHC14  | NM_153746    | 79683  | A_23_P250619 | -6,72  |
| ZFPM2   | NM_012082    | 23414  | A_24_P273857 | -3,35  |
| ZMIZ2   | NM_031449    | 83637  | A_24_P29686  | 3,00   |
| ZMYND10 | NM_015896    | 51364  | A_23_P29663  | 3,22   |
| ZNF100  | BC035579     | 163227 | A_32_P48244  | -5,42  |
| ZNF175  | NM_007147    | 7728   | A_23_P332374 | 4,53   |
| ZNF207  | AK026215     | 7756   | A_24_P116766 | 6,56   |
| ZNF226  | NM_001032374 | 7769   | A_23_P218434 | 3,20   |
| ZNF23   | AF024709     | 7571   | A_24_P935125 | 4,06   |
| ZNF280D | NM_017661    | 54816  | A_23_P14708  | 4,19   |
| ZNF295  | NM_020727    | 49854  | A_24_P339869 | 3,24   |
| ZNF35   | NM_003420    | 7584   | A_23_P211785 | 7,36   |
| ZNF350  | NM_021632    | 59348  | A_23_P78458  | -5,03  |
| ZNF433  | NM_001080411 | 163059 | A_23_P27649  | -3,67  |
| ZNF486  | NM_052852    | 90649  | A_24_P100016 | -2,56  |
| ZNF577  | NM_032679    | 84765  | A_23_P309207 | -5,23  |
| ZNF613  | NM_024840    | 79898  | A_24_P173234 | -4,07  |
| ZNF649  | NM_023074    | 65251  | A_23_P208208 | -5,87  |
| ZNF655  | NM_001083956 | 79027  | A_23_P345081 | 3,59   |
| ZNF681  | NM_138286    | 148213 | A_32_P167904 | -4,90  |
| ZNF682  | NM_033196    | 91120  | A_24_P944588 | 3,35   |
| ZNF704  | NM_001033723 | 619279 | A_24_P230074 | 4,61   |
| ZNF789  | AK131429     | 285989 | A_32_P542928 | 4,13   |
| ZNRF2   | NM_147128    | 223082 | A_23_P325017 | 4,66   |
| ZSWIM5  | NM_020883    | 57643  | A_23_P383118 | 3,08   |

Table S2: Clinical data of patients recruited for TMA

| #  | TMA Order | Dis ID | DOB        | Benign/ Cancer1 | FKBP7 | Months to Recurrence | FOLLOW UP AFTER SURGERY( NONRECURRENT-1) | DIAGNOSIS DATE | DATE OF SURGERY/RADIATION | LAST FOLLOW UP/DATE OF PSA RECURRENCE | FOLLOW UP AFTER SURGERY( NONRECURRENT-1) | PSA AT DX | BIOPS TOTAL GLEASON SCORE | RRPRTOTAL GLEASON SCORE | EXTRACAPSULAR INVASION ( 0 &1) | SEMINAL VESICLES ( 0 &1) | POSITIVE MARGINS? | Positive cores/total cores | Main Treatment; no Tr ( 0) NHT (1) NHT/TAX2 | LN Metastasis ( 1) distant Metastasis (2) | PATHOLOGICAL STAGING ( 1-7) |
|----|-----------|--------|------------|-----------------|-------|----------------------|------------------------------------------|----------------|---------------------------|---------------------------------------|------------------------------------------|-----------|---------------------------|-------------------------|--------------------------------|--------------------------|-------------------|----------------------------|---------------------------------------------|-------------------------------------------|-----------------------------|
| 1  | 1         | 3722   | 18/05/1940 | 0               | 1     | 120,00               | 0                                        | 17/12/2003     | 20/01/2004                | 20/01/2014                            | 0                                        | 4,7       | 7                         | 6                       | 0                              | 0                        | 1                 | 0,3                        | 0                                           | 0                                         | 4                           |
| 2  | 2         | 3722   | 18/05/1940 | 0               | 1     | 120,00               | 0                                        | 17/12/2003     | 20/01/2004                | 20/01/2014                            | 0                                        | 4,7       | 7                         | 6                       | 0                              | 0                        | 1                 | 0,3                        | 0                                           | 0                                         | 4                           |
| 3  | 3         | 3666   | 25/02/1952 | 0               | 1     | 49,97                | 0                                        | 17/10/2003     | 20/01/2004                | 19/03/2008                            | 0                                        | 7,8       | 6                         | 6                       | 0                              | 0                        | 0                 | 0,3                        | 0                                           | 0                                         | 4                           |
| 4  | 4         | 3666   | 25/02/1952 | 0               | 1     | 49,97                | 0                                        | 17/10/2003     | 20/01/2004                | 19/03/2008                            | 0                                        | 7,8       | 6                         | 6                       | 0                              | 0                        | 0                 | 0,3                        | 0                                           | 0                                         | 4                           |
| 5  | 5         | 3641   | 29/05/1938 | 0               | 1     | 80,47                | 0                                        | 30/09/2003     | 22/01/2004                | 06/10/2010                            | 0                                        | 7,43      | 7                         | 6                       | 0                              | 0                        | 0                 | 0,3                        | 0                                           | 0                                         | 4                           |
| 6  | 6         | 3641   | 29/05/1938 | 1               | 1     | 80,47                | 0                                        | 30/09/2003     | 22/01/2004                | 06/10/2010                            | 0                                        | 7,43      | 7                         | 6                       | 0                              | 0                        | 0                 | 0,3                        | 0                                           | 0                                         | 4                           |
| 7  | 7         | 3748   | 21/06/1934 | 0               | 0     | 61,17                | 0                                        | 29/05/2003     | 27/01/2004                | 02/03/2009                            | 0                                        | 8         | 6                         | 6                       | 0                              | 0                        | 1                 | 0,4                        | 0                                           | 0                                         | 4                           |
| 8  | 8         | 3748   | 21/06/1934 | 1               | 0     | 61,17                | 0                                        | 29/05/2003     | 27/01/2004                | 02/03/2009                            | 0                                        | 8         | 6                         | 6                       | 0                              | 0                        | 1                 | 0,4                        | 0                                           | 0                                         | 4                           |
| 9  | 9         | 3669   | 01/04/1933 | 1               | 0     | 98,43                | 0                                        | 21/10/2003     | 29/01/2004                | 12/04/2012                            | 0                                        | 6,1       | 7                         | 6                       | 0                              | 0                        | 0                 | 0,6                        | 0                                           | 0                                         | 4                           |
| 10 | 10        | 3669   | 01/04/1933 | 0               | 0     | 98,43                | 0                                        | 21/10/2003     | 29/01/2004                | 12/04/2012                            | 0                                        | 6,1       | 7                         | 6                       | 0                              | 0                        | 0                 | 0,6                        | 0                                           | 0                                         | 4                           |
| 11 | 11        | 3651   | 25/06/1937 | 1               | 1     | 89,47                | 0                                        | 08/10/2003     | 30/01/2004                | 14/07/2011                            | 0                                        | 6         | 7                         | 7                       | 0                              | 0                        | 0                 | 0,4                        | 0                                           | 0                                         | 2                           |
| 12 | 12        | 3651   | 25/06/1937 | 1               | 1     | 89,47                | 0                                        | 08/10/2003     | 30/01/2004                | 14/07/2011                            | 0                                        | 6         | 7                         | 7                       | 0                              | 0                        | 0                 | 0,4                        | 0                                           | 0                                         | 2                           |
| 13 | 13        | 3699   | 08/02/1950 | 1               | 1     |                      | 0                                        | 20/11/2003     | 04/03/2004                | 04/03/2004                            | 0                                        | 8,15      | 6                         | 7                       | 0                              | 0                        | 0                 | 0,9                        | 0                                           | 0                                         | 4                           |
| 14 | 14        | 3699   | 08/02/1950 | 1               | 1     |                      | 0                                        | 20/11/2003     | 04/03/2004                | 04/03/2004                            | 0                                        | 8,15      | 6                         | 7                       | 0                              | 0                        | 0                 | 0,9                        | 0                                           | 0                                         | 4                           |
| 15 | 15        | 3699   | 08/02/1950 | 0               | 0     |                      | 0                                        | 20/11/2003     | 04/03/2004                | 04/03/2004                            | 0                                        | 8,15      | 6                         | 7                       | 0                              | 0                        | 0                 | 0,9                        | 0                                           | 0                                         | 4                           |
| 16 | 16        | 3699   | 08/02/1950 | 0               | 0     |                      | 0                                        | 20/11/2003     | 04/03/2004                | 04/03/2004                            | 0                                        | 8,15      | 6                         | 7                       | 0                              | 0                        | 0                 | 0,9                        | 0                                           | 0                                         | 4                           |
| 17 | 17        | 3846   | 16/02/1939 | 1               | 1     | 30,40                | 1                                        | 16/03/2004     | 06/05/2004                | 18/11/2006                            | 1                                        | 24,1      | 7                         | 9                       | 1                              | 1                        | 1                 | 0,5                        | 0                                           | 0                                         | 5                           |
| 18 | 18        | 3846   | 16/02/1939 | 1               | 1     | 30,40                | 1                                        | 16/03/2004     | 06/05/2004                | 18/11/2006                            | 1                                        | 24,1      | 7                         | 9                       | 1                              | 1                        | 1                 | 0,5                        | 0                                           | 0                                         | 5                           |
| 19 | 19        | 3846   | 16/02/1939 | 1               | 1     | 30,40                | 1                                        | 16/03/2004     | 06/05/2004                | 18/11/2006                            | 1                                        | 24,1      | 7                         | 9                       | 1                              | 1                        | 1                 | 0,5                        | 0                                           | 0                                         | 5                           |
| 20 | 20        | 3846   | 16/02/1939 | 1               | 1     | 30,40                | 1                                        | 16/03/2004     | 06/05/2004                | 18/11/2006                            | 1                                        | 24,1      | 7                         | 9                       | 1                              | 1                        | 1                 | 0,5                        | 0                                           | 0                                         | 5                           |
| 21 | 21        | 3788   | 30/11/1948 | 1               | 0     | 90,37                | 0                                        | 03/03/2004     | 25/05/2004                | 06/12/2011                            | 0                                        | 6,9       | 7                         | 7                       | 0                              | 0                        | 1                 | 0,5                        | 0                                           | 0                                         | 4                           |
| 22 | 22        | 3788   | 30/11/1948 | 1               | 0     | 90,37                | 0                                        | 03/03/2004     | 25/05/2004                | 06/12/2011                            | 0                                        | 6,9       | 7                         | 7                       | 0                              | 0                        | 1                 | 0,5                        | 0                                           | 0                                         | 4                           |
| 23 | 23        | 3836   | 18/11/1961 | 1               | 2     | 120,87               | 0                                        | 22/04/2004     | 27/05/2004                | 23/06/2014                            | 0                                        | 9         | 7                         | 7                       | 0                              | 0                        | 0                 | 0,4                        | 0                                           | 0                                         | 4                           |
| 24 | 24        | 3836   | 18/11/1961 | 1               | 2     | 120,87               | 0                                        | 22/04/2004     | 27/05/2004                | 23/06/2014                            | 0                                        | 9         | 7                         | 7                       | 0                              | 0                        | 0                 | 0,4                        | 0                                           | 0                                         | 4                           |
| 25 | 25        | 3822   | 26/05/1935 | 0               | 0     | 113,00               | 1                                        | 07/04/2004     | 01/06/2004                | 31/10/2013                            | 1                                        | 16        | 8                         | 9                       | 1                              | 1                        | 1                 | 0,7                        | 0                                           | 0                                         | 6                           |
| 26 | 26        | 3822   | 26/05/1935 | 1               | 0     | 113,00               | 1                                        | 07/04/2004     | 01/06/2004                | 31/10/2013                            | 1                                        | 16        | 8                         | 9                       | 1                              | 1                        | 1                 | 0,7                        | 0                                           | 0                                         | 6                           |
| 27 | 27        | 3775   | 06/10/1952 | 1               | 3     |                      | 0                                        | 19/02/2004     | 27/07/2004                |                                       | 0                                        | 6,5       | 6                         | 6                       | 0                              | 0                        | 1                 | 0,4                        | 0                                           | 0                                         | 4                           |
| 28 | 28        | 3775   | 06/10/1952 | 1               | 3     |                      | 0                                        | 19/02/2004     | 27/07/2004                |                                       | 0                                        | 6,5       | 6                         | 6                       | 0                              | 0                        | 1                 | 0,4                        | 0                                           | 0                                         | 4                           |
| 29 | 29        | 3835   | 14/12/1941 | 1               | 0     | 85,07                | 0                                        | 22/04/2004     | 11/08/2004                | 13/09/2011                            | 0                                        | 5,2       | 7                         | 6                       | 0                              | 0                        | 0                 | 0,3                        | 0                                           | 0                                         | 4                           |
| 30 | 30        | 3835   | 14/12/1941 | 1               | 1     | 85,07                | 0                                        | 22/04/2004     | 11/08/2004                | 13/09/2011                            | 0                                        | 5,2       | 7                         | 6                       | 0                              | 0                        | 0                 | 0,3                        | 0                                           | 0                                         | 4                           |
| 31 | 31        | 3866   | 02/02/1934 | 1               | 1     | 97,60                | 0                                        | 27/05/2004     | 11/08/2004                | 29/09/2012                            | 0                                        | 1,7       | 6                         | 6                       | 0                              | 0                        | 0                 | 0,5                        | 0                                           | 0                                         | 4                           |
| 32 | 32        | 3866   | 02/02/1934 | 1               | 3     | 97,60                | 0                                        | 27/05/2004     | 11/08/2004                | 29/09/2012                            | 0                                        | 1,7       | 6                         | 6                       | 0                              | 0                        | 0                 | 0,5                        | 0                                           | 0                                         | 4                           |
| 33 | 33        | 3964   | 09/01/1947 | 1               | 2     |                      | 0                                        |                | 23/09/2004                | 23/09/2004                            | 0                                        |           |                           | 7                       | 1                              | 0                        | 1                 |                            | 0                                           | 0                                         | 5                           |
| 34 | 34        | 3964   | 09/01/1947 | 1               | 2     |                      | 0                                        |                | 23/09/2004                | 23/09/2004                            | 0                                        |           |                           | 7                       | 1                              | 0                        | 1                 |                            | 0                                           | 0                                         | 5                           |
| 35 | 35        | 3964   | 09/01/1947 | 0               | 0     |                      | 0                                        |                | 23/09/2004                | 23/09/2004                            | 0                                        |           |                           | 7                       | 1                              | 0                        | 1                 |                            | 0                                           | 0                                         | 5                           |
| 36 | 36        | 3964   | 09/01/1947 | 0               | 0     |                      | 0                                        |                | 23/09/2004                | 23/09/2004                            | 0                                        |           |                           | 7                       | 1                              | 0                        | 1                 |                            | 0                                           | 0                                         | 5                           |
| 37 | 37        | 3862   | 07/09/1954 | 1               | 1     | 85,33                | 0                                        | 23/06/2004     | 05/10/2004                | 15/11/2011                            | 0                                        | 5,3       | 7                         | 6                       | 0                              | 0                        | 0                 | 0,3                        | 0                                           | 0                                         | 4                           |
| 38 | 38        | 3862   | 07/09/1954 | 0               | 2     | 85,33                | 0                                        | 23/06/2004     | 05/10/2004                | 15/11/2011                            | 0                                        | 5,3       | 7                         | 6                       | 0                              | 0                        | 0                 | 0,3                        | 0                                           | 0                                         | 4                           |
| 39 | 39        | 3862   | 07/09/1954 | 0               | 1     | 85,33                | 0                                        | 23/06/2004     | 05/10/2004                | 15/11/2011                            | 0                                        | 5,3       | 7                         | 6                       | 0                              | 0                        | 0                 | 0,3                        | 0                                           | 0                                         | 4                           |
| 40 | 40        | 3862   | 07/09/1954 | 0               | 1     | 85,33                | 0                                        | 23/06/2004     | 05/10/2004                | 15/11/2011                            | 0                                        | 5,3       | 7                         | 6                       | 0                              | 0                        | 0                 | 0,3                        | 0                                           | 0                                         | 4                           |
| 41 | 41        | 3849   | 31/07/1938 | 0               | 0     | 121,17               | 0                                        | 12/05/2004     | 12/10/2004                | 17/11/2014                            | 0                                        | 6,5       | 7                         | 7                       | 0                              | 0                        | 0                 | 0,3                        | 0                                           | 0                                         | 4                           |
| 42 | 42        | 3849   | 31/07/1938 | 0               | 0     | 121,17               | 0                                        | 12/05/2004     | 12/10/2004                | 17/11/2014                            | 0                                        | 6,5       | 7                         | 7                       | 0                              | 0                        | 0                 | 0,3                        | 0                                           | 0                                         | 4                           |
| 43 | 43        | 3678   | 29/01/1940 | 1               | 2     | 12,80                | 1                                        | 01/10/2003     | 14/10/2004                | 08/11/2005                            | 1                                        | 6,3       | 6                         | 8                       | 1                              | 1                        | 1                 | 0,3                        | 0                                           | 0                                         | 6                           |
| 44 | 44        | 3678   | 29/01/1940 | 1               | 2     | 12,80                | 1                                        | 01/10/2003     | 14/10/2004                | 08/11/2005                            | 1                                        | 6,3       | 6                         | 8                       | 1                              | 1                        | 1                 | 0,3                        | 0                                           | 0                                         | 6                           |
| 45 | 45        | 3861   | 15/05/1934 | 1               | 0     | 79,70                | 0                                        | 20/05/2004     | 19/10/2004                | 10/06/2011                            | 0                                        | 5,1       | 6                         | 6                       | 1                              | 0                        | 1                 | 0,1                        | 0                                           | 0                                         | 5                           |
| 46 | 46        | 3861   | 15/05/1934 | 1               | 0     | 79,70                | 0                                        | 20/05/2004     | 19/10/2004                | 10/06/2011                            | 0                                        | 5,1       | 6                         | 6                       | 1                              | 0                        | 1                 | 0,1                        | 0                                           | 0                                         | 5                           |
| 47 | 47        | 3891   | 04/01/1948 | 1               | 1     | 98,73                | 1                                        | 18/06/2004     | 09/11/2004                | 01/02/2013                            | 1                                        | 7         | 7                         | 7                       | 0                              | 0                        | 0                 | 0,5                        | 0                                           | 0                                         | 2                           |
| 48 | 48        | 3891   | 04/01/1948 | 1               | 2     | 98,73                | 1                                        | 18/06/2004     | 09/11/2004                | 01/02/2013                            | 1                                        | 7         | 7                         | 7                       | 0                              | 0                        | 0                 | 0,5                        | 0                                           | 0                                         | 2                           |
| 49 | 49        | 3750   | 18/12/1936 | 1               | 3     | 60,97                | 0                                        | 29/01/2004     | 13/04/2004                | 12/05/2009                            | 0                                        | 15,6      | 7                         | 9                       | 1                              | 1                        | 0                 | 0,4                        | 0                                           | 0                                         | 5                           |
| 50 | 50        | 3750   | 18/12/1936 | 1               | 3     | 60,97                | 0                                        | 29/01/2004     | 13/04/2004                | 12/05/2009                            | 0                                        | 15,6      | 7                         | 9                       | 1                              | 1                        | 0                 | 0,4                        | 0                                           | 0                                         | 5                           |
| 51 | 51        | 3641   | 29/05/1938 | 0               | 0     | 80,47                | 0                                        | 30/09/2003     | 22/01/2004                | 06/10/2010                            | 0                                        | 7,43      | 7                         | 6                       | 0                              | 0                        | 0                 | 0,3                        | 0                                           | 0                                         | 4                           |
| 52 | 52        | 3641   | 29/05/1938 | 0               | 0     | 80,47                | 0                                        | 30/09/2003     | 22/01/2004                | 06/10/2010                            | 0                                        | 7,43      | 7                         | 6                       | 0                              | 0                        | 0                 | 0,3                        | 0                                           | 0                                         | 4                           |
| 53 | 53        | 3886   | 31/05/1949 | 1               | 0     | 79,60                | 0                                        | 17/06/2004     | 23/09/2004                | 11/05/2011                            | 0                                        | 8,2       | 7                         | 7                       | 0                              | 0                        | 0                 | 0,1                        | 0                                           | 0                                         | 4                           |
| 54 | 54        | 3886   | 31/05/1949 | 1               | 1     | 79,60                | 0                                        | 17/06/2004     | 23/09/2004                | 11/05/2011                            | 0                                        | 8,2       | 7                         | 7                       | 0                              | 0                        | 0                 | 0,1                        | 0                                           | 0                                         | 4                           |
| 55 | 55        | 4029   | 13/01/1938 | 0               | 2     | 52,20                | 1                                        | 31/03/2004     | 02/12/2004                | 08/04/2009                            | 1                                        | 6         | 6                         | 6                       | 0                              | 0                        | 0                 | 0,5                        | 0                                           | 0                                         | 4                           |

|     |     |      |            |   |   |        |   |            |            |            |            |      |   |   |   |   |     |     |   |   |   |
|-----|-----|------|------------|---|---|--------|---|------------|------------|------------|------------|------|---|---|---|---|-----|-----|---|---|---|
| 56  | 56  | 4029 | 13/01/1938 | 0 | 0 | 52.20  | 1 | 31/03/2004 | 02/12/2004 | 08/04/2009 | 1          | 6    | 6 | 6 | 0 | 0 | 0   | 0.5 | 0 | 0 | 4 |
| 57  | 57  | 4043 | 20/11/1933 | 1 | 0 |        | 1 | 14/12/2004 | 19/04/2005 |            | 1          | 7.02 | 7 | 7 | 0 | 0 | 1   | 0.1 | 0 | 0 | 4 |
| 58  | 58  | 4043 | 20/11/1933 | 1 | 0 |        | 1 | 14/12/2004 | 19/04/2005 |            | 1          | 7.02 | 7 | 7 | 0 | 0 | 1   | 0.1 | 0 | 0 | 4 |
| 59  | 59  | 4162 | 16/10/1939 | 1 | 2 | 85.13  | 0 | 26/04/2005 | 05/07/2005 | 09/08/2012 | 0          | 8.1  | 8 | 7 | 0 | 0 | 0   | 1.0 | 0 | 0 | 4 |
| 60  | 60  | 4162 | 16/10/1939 | 1 | 2 | 85.13  | 0 | 26/04/2005 | 05/07/2005 | 09/08/2012 | 0          | 8.1  | 8 | 7 | 0 | 0 | 0   | 1.0 | 0 | 0 | 4 |
| 61  | 61  | 4235 | 11/06/1942 | 1 | 3 | 105.80 | 0 | 25/04/2005 | 12/07/2005 | 06/05/2014 | 0          | 7.6  | 7 | 7 | 0 | 0 | 1   | 0.5 | 0 | 0 | 4 |
| 62  | 62  | 4235 | 11/06/1942 | 1 | 3 | 105.80 | 0 | 25/04/2005 | 12/07/2005 | 06/05/2014 | 0          | 7.6  | 7 | 7 | 0 | 0 | 1   | 0.5 | 0 | 0 | 4 |
| 63  | 63  | 4211 | 24/09/1949 | 1 | 2 | 78.07  | 1 | 14/06/2005 | 30/08/2005 | 02/03/2012 | 1          | 14   | 7 | 7 | 0 | 0 | 1   | 0.5 | 0 | 0 | 4 |
| 64  | 64  | 4211 | 24/09/1949 | 1 | 1 | 78.07  | 1 | 14/06/2005 | 30/08/2005 | 02/03/2012 | 1          | 14   | 7 | 7 | 0 | 0 | 1   | 0.5 | 0 | 0 | 4 |
| 65  | 65  | 4237 | 17/08/1946 | 1 | 1 | 41.80  | 0 | 14/07/2005 | 06/10/2005 | 30/03/2009 | 0          | 8.3  | 7 | 7 | 0 | 0 | 0   | 0.4 | 0 | 0 | 4 |
| 66  | 66  | 4237 | 17/08/1946 | 0 | x | 41.80  | 0 | 14/07/2005 | 06/10/2005 | 30/03/2009 | 0          | 8.3  | 7 | 7 | 0 | 0 | 0   | 0.4 | 0 | 0 | 4 |
| 67  | 67  | 4171 | 11/02/1948 | 1 | 3 |        | 0 | 05/05/2005 | 11/10/2005 |            | 0          |      | 7 | 7 | 1 | 0 | 0   | 0.5 | 0 | 0 | 5 |
| 68  | 68  | 4171 | 11/02/1948 | 1 | 3 |        | 0 | 05/05/2005 | 11/10/2005 |            | 0          |      | 7 | 7 | 1 | 0 | 0   | 0.5 | 0 | 0 | 5 |
| 69  | 69  | 4257 | 21/12/1948 | 1 | 2 | 100.67 | 0 | 09/08/2005 | 24/11/2005 | 14/04/2014 | 0          | 6.5  | 6 | 7 | 0 | 0 | 0   | 0.5 | 0 | 0 | 4 |
| 70  | 70  | 4257 | 21/12/1948 | 1 | 2 | 100.67 | 0 | 09/08/2005 | 24/11/2005 | 14/04/2014 | 0          | 6.5  | 6 | 7 | 0 | 0 | 0   | 0.5 | 0 | 0 | 4 |
| 71  | 71  | 3936 | 17/10/1938 | 1 | 2 | 123.13 | 0 | 31/08/2004 | 06/01/2005 | 10/04/2015 | 0          | 6.06 | 7 | 7 | 1 | 0 | 0   | 0.3 | 0 | 0 | 5 |
| 72  | 72  | 3936 | 17/10/1938 | 1 | 2 | 123.13 | 0 | 31/08/2004 | 06/01/2005 | 10/04/2015 | 0          | 6.06 | 7 | 7 | 1 | 0 | 0   | 0.3 | 0 | 0 | 5 |
| 73  | 73  | 4040 | 29/05/1942 | 1 | 2 | 39.97  | 0 | 13/12/2004 | 24/03/2005 | 23/07/2008 | 0          | 26   | 7 | 7 | 1 | 0 | 1   | 0.4 | 0 | 0 | 5 |
| 74  | 74  | 4040 | 29/05/1942 | 1 | 2 | 39.97  | 0 | 13/12/2004 | 24/03/2005 | 23/07/2008 | 0          | 26   | 7 | 7 | 1 | 0 | 1   | 0.4 | 0 | 0 | 5 |
| 75  | 75  | 4186 | 20/09/1939 | 1 | 3 | 116.87 | 1 | 18/05/2005 | 08/09/2005 | 04/06/2015 | 1          | 6.8  | 7 | 7 | 1 | 0 | 1   | 0.5 | 1 | 2 | 5 |
| 76  | 76  | 4186 | 20/09/1939 | 1 | x | 116.87 | 1 | 18/05/2005 | 08/09/2005 | 04/06/2015 | 1          | 6.8  | 7 | 7 | 1 | 0 | 1   | 0.5 | 1 | 2 | 5 |
| 77  | 77  | 4384 | 12/01/1938 | 1 | 1 | 93.77  | 0 | 20/12/2005 | 28/02/2006 | 23/12/2013 | 0          | 12.6 | 6 | 7 | 0 | 0 | 1   | 0.5 | 0 | 0 | 2 |
| 78  | 78  | 4384 | 12/01/1938 | 1 | 1 | 93.77  | 0 | 20/12/2005 | 28/02/2006 | 23/12/2013 | 0          | 12.6 | 6 | 7 | 0 | 0 | 1   | 0.5 | 0 | 0 | 2 |
| 79  | 79  | 4340 | 19/12/1939 | 1 | 1 |        | 0 | 08/11/2005 | 28/02/2006 |            | 0          | 6    | 7 | 0 | 0 | 0 | 0.9 | 0   | 0 | 4 |   |
| 80  | 80  | 4340 | 19/12/1939 | 1 | 2 |        | 0 | 08/11/2005 | 28/02/2006 |            | 0          | 6    | 7 | 0 | 0 | 0 | 0.9 | 0   | 0 | 4 |   |
| 81  | 81  | 4511 | 25/05/1934 | 1 | 0 | 81.37  | 1 | 11/01/2006 | 24/03/2006 | 05/01/2013 | 1          | 13   | 7 | 7 | 0 | 0 | 1   | 0.5 | 0 | 0 | 4 |
| 82  | 82  | 4511 | 25/05/1934 | 1 | 1 | 81.37  | 1 | 11/01/2006 | 24/03/2006 | 05/01/2013 | 1          | 13   | 7 | 7 | 0 | 0 | 1   | 0.5 | 0 | 0 | 4 |
| 83  | 83  | 4471 | 02/12/1942 | 1 | 3 | 98.83  | 0 | 21/02/2006 | 20/04/2006 | 15/07/2014 | 0          | 8.95 | 8 | 8 | 0 | 0 | 0   | 0.3 | 0 | 0 | 4 |
| 84  | 84  | 4471 | 02/12/1942 | 0 | 3 | 98.83  | 0 | 21/02/2006 | 20/04/2006 | 15/07/2014 | 0          | 8.95 | 8 | 8 | 0 | 0 | 0   | 0.3 | 0 | 0 | 4 |
| 85  | 85  | 4594 | 08/09/1942 | 1 | 1 | 95.77  | 0 | 14/06/2006 | 04/07/2006 | 27/06/2014 | 0          | 26   | 7 | 7 | 1 | 0 | 1   | 0   | 0 | 0 | 5 |
| 86  | 86  | 4594 | 08/09/1942 | 1 | 3 | 95.77  | 0 | 14/06/2006 | 04/07/2006 | 27/06/2014 | 0          | 26   | 7 | 7 | 1 | 0 | 1   | 0   | 0 | 0 | 5 |
| 87  | 87  | 4572 | 06/05/1933 | 1 | x | 50.50  | 1 | 25/05/2006 | 13/07/2006 | 28/09/2010 | 1          | 8.9  | 9 | 9 | 1 | 1 | 0   | 0.3 | 1 | 0 | 6 |
| 88  | 88  | 4572 | 06/05/1933 | 1 | 2 | 50.50  | 1 | 25/05/2006 | 13/07/2006 | 28/09/2010 | 1          | 8.9  | 9 | 9 | 1 | 1 | 0   | 0.3 | 1 | 0 | 6 |
| 89  | 89  | 4530 | 16/09/1958 | 1 | 2 | 28.63  | 0 | 12/04/2006 | 26/07/2006 | 15/12/2008 | 0          | 8.8  | 7 | 7 | 0 | 0 | 1   | 0.3 | 0 | 0 | 3 |
| 90  | 90  | 4530 | 16/09/1958 | 1 | 2 | 28.63  | 0 | 12/04/2006 | 26/07/2006 | 15/12/2008 | 0          | 8.8  | 7 | 7 | 0 | 0 | 1   | 0.3 | 0 | 0 | 3 |
| 91  | 91  | 3596 | 07/08/1941 | 1 | 0 |        | 0 |            |            | 13/08/2003 | 13/08/2003 | 2.85 |   | 7 | 0 | 0 | 0   | 0   | 0 | 0 | 4 |
| 92  | 92  | 3596 | 07/08/1941 | 1 | 1 |        | 0 |            |            | 13/08/2003 | 13/08/2003 | 2.85 |   | 7 | 0 | 0 | 0   | 0   | 0 | 0 | 4 |
| 93  | 93  | 3596 | 07/08/1941 | 1 | 0 |        | 0 |            |            | 13/08/2003 | 13/08/2003 | 2.85 |   | 7 | 0 | 0 | 0   | 0   | 0 | 0 | 4 |
| 94  | 94  | 3596 | 07/08/1941 | 1 | 1 |        | 0 |            |            | 13/08/2003 | 13/08/2003 | 2.85 |   | 7 | 0 | 0 | 0   | 0   | 0 | 0 | 4 |
| 95  | 95  | 4624 | 12/08/1939 | 1 | 3 |        | 0 | 19/07/2006 | 04/10/2006 |            | 0          | 7.1  | 7 | 7 | 0 | 0 | 1   | 0.6 | 0 | 0 | 4 |
| 96  | 96  | 4624 | 12/08/1939 | 1 | x |        | 0 | 19/07/2006 | 04/10/2006 |            | 0          | 7.1  | 7 | 7 | 0 | 0 | 1   | 0.6 | 0 | 0 | 4 |
| 97  | 97  | 4533 | 25/07/1945 | 0 | 1 | 72.23  | 0 | 19/04/2006 | 13/06/2006 | 20/06/2012 | 0          | 4.3  | 6 | 7 | 0 | 0 | 0   | 0.3 | 0 | 0 | 4 |
| 98  | 98  | 4533 | 25/07/1945 | 0 | 1 | 72.23  | 0 | 19/04/2006 | 13/06/2006 | 20/06/2012 | 0          | 4.3  | 6 | 7 | 0 | 0 | 0   | 0.3 | 0 | 0 | 4 |
| 99  | 99  | 4123 | 15/02/1941 | 0 | 2 | 92.30  | 0 | 25/02/2005 | 15/06/2006 | 24/02/2014 | 0          | 9    | 8 | 7 | 0 | 0 | 1   | 0   | 0 | 0 | 4 |
| 100 | 100 | 4123 | 15/02/1941 | 0 | 2 | 92.30  | 0 | 25/02/2005 | 15/06/2006 | 24/02/2014 | 0          | 9    | 8 | 7 | 0 | 0 | 1   | 0   | 0 | 0 | 4 |
| 101 | 101 | 4617 | 18/06/1954 | 1 | 2 |        | 0 | 13/07/2006 | 04/10/2005 |            | 0          | 6.5  | 6 | 6 | 0 | 0 | 1   | 0.4 | 0 | 0 | 4 |
| 102 | 102 | 4617 | 18/06/1954 | 1 | 1 |        | 0 | 13/07/2006 | 04/10/2005 |            | 0          | 6.5  | 6 | 6 | 0 | 0 | 1   | 0.4 | 0 | 0 | 4 |
| 103 | 103 | 4544 | 25/10/1933 | 0 | 1 | 45.93  | 0 | 02/05/2006 | 15/06/2006 | 13/04/2010 | 0          | 4.05 | 7 | 7 | 1 | 1 | 1   | 0.6 | 0 | 0 | 5 |
| 104 | 104 | 4544 | 25/10/1933 | 0 | 2 | 45.93  | 0 | 02/05/2006 | 15/06/2006 | 13/04/2010 | 0          | 4.05 | 7 | 7 | 1 | 1 | 1   | 0.6 | 0 | 0 | 5 |
| 105 | 105 | 4700 | 10/11/1940 | 1 | 3 | 35.50  | 0 | 26/10/2006 | 02/01/2007 | 17/12/2009 | 0          | 7.7  | 9 | 9 | 1 | 0 | 0   | 0.5 | 0 | 0 | 5 |
| 106 | 106 | 4700 | 10/11/1940 | 1 | 3 | 35.50  | 0 | 26/10/2006 | 02/01/2007 | 17/12/2009 | 0          | 7.7  | 9 | 9 | 1 | 0 | 0   | 0.5 | 0 | 0 | 5 |
| 107 | 107 | 4700 | 10/11/1940 | 1 | 3 | 35.50  | 0 | 26/10/2006 | 02/01/2007 | 17/12/2009 | 0          | 7.7  | 9 | 9 | 1 | 0 | 0   | 0.5 | 0 | 0 | 5 |
| 108 | 108 | 4700 | 10/11/1940 | 1 | 3 | 35.50  | 0 | 26/10/2006 | 02/01/2007 | 17/12/2009 | 0          | 7.7  | 9 | 9 | 1 | 0 | 0   | 0.5 | 0 | 0 | 5 |
| 109 | 109 | 4783 | 07/10/1947 | 1 | 3 | 36.73  | 0 | 11/10/2006 | 09/01/2007 | 01/02/2010 | 0          | 5.7  | 7 | 7 | 0 | 0 | 0   | 0.4 | 0 | 0 | 4 |
| 110 | 110 | 4783 | 07/10/1947 | 1 | 2 | 36.73  | 0 | 11/10/2006 | 09/01/2007 | 01/02/2010 | 0          | 5.7  | 7 | 7 | 0 | 0 | 0   | 0.4 | 0 | 0 | 4 |
| 111 | 111 | 4812 | 23/07/1942 | 1 | 0 |        | 0 | 31/01/2007 | 01/02/2007 | 01/02/2007 | 0          | 6    | 7 | 0 | 0 | 1 | 0   | 0   | 0 | 0 | 2 |
| 112 | 112 | 4812 | 23/07/1942 | 1 | 1 |        | 0 | 31/01/2007 | 01/02/2007 | 01/02/2007 | 0          | 6    | 7 | 0 | 0 | 1 | 0   | 0   | 0 | 0 | 2 |
| 113 | 113 | 4817 | 30/05/1947 | 1 | 3 | 97.10  | 0 | 01/12/2006 | 06/02/2007 | 09/03/2015 | 0          | 4.07 | 7 | 7 | 0 | 0 | 1   | 0.4 | 0 | 0 | 4 |
| 114 | 114 | 4817 | 30/05/1947 | 1 | 0 | 97.10  | 0 | 01/12/2006 | 06/02/2007 | 09/03/2015 | 0          | 4.07 | 7 | 7 | 0 | 0 | 1   | 0.4 | 0 | 0 | 4 |

|     |     |      |            |   |   |       |   |            |            |            |   |      |   |   |   |   |   |     |   |   |   |
|-----|-----|------|------------|---|---|-------|---|------------|------------|------------|---|------|---|---|---|---|---|-----|---|---|---|
| 115 | 115 | 4833 | 22/07/1942 | 1 | 2 | 0     |   |            | 15/02/2007 | 15/02/2007 | 0 | 13   | 6 | 6 | 0 | 0 | 0 | 0,1 | 0 | 0 | 4 |
| 116 | 116 | 4833 | 22/07/1942 | 1 | 1 | 0     |   |            | 15/02/2007 | 15/02/2007 | 0 | 13   | 6 | 6 | 0 | 0 | 0 | 0,1 | 0 | 0 | 4 |
| 117 | 117 | 4879 | 10/09/1940 | 0 | x | 11,87 | 0 | 09/05/2006 | 23/03/2007 | 19/03/2008 | 0 | 6,8  | 6 |   | 0 | 0 | 0 | 0,1 | 0 | 0 | 1 |
| 118 | 118 | 4879 | 10/09/1940 | 0 | 1 | 11,87 | 0 | 09/05/2006 | 23/03/2007 | 19/03/2008 | 0 | 6,8  | 6 |   | 0 | 0 | 0 | 0,1 | 0 | 0 | 1 |
| 119 | 119 | 4640 | 13/09/1939 | 1 | 3 | 19,57 | 0 | 17/08/2006 | 23/03/2007 | 10/11/2008 | 0 | 6,6  | 6 | 7 | 1 | 0 | 1 | 0,3 | 0 | 0 | 5 |
| 120 | 120 | 4640 | 13/09/1939 | 1 | 2 | 19,57 | 0 | 17/08/2006 | 23/03/2007 | 10/11/2008 | 0 | 6,6  | 6 | 7 | 1 | 0 | 1 | 0,3 | 0 | 0 | 5 |
| 121 | 121 | 4910 | 25/08/1936 | 1 | 3 | 36,53 | 0 | 21/12/2006 | 18/04/2007 | 04/05/2010 | 0 | 11   | 7 | 8 | 0 | 0 | 1 | 0,1 | 0 | 0 | 4 |
| 122 | 122 | 4910 | 25/08/1936 | 1 | 3 | 36,53 | 0 | 21/12/2006 | 18/04/2007 | 04/05/2010 | 0 | 11   | 7 | 8 | 0 | 0 | 1 | 0,1 | 0 | 0 | 4 |
| 123 | 123 | 4871 | 22/05/1947 | 1 | 1 | 33,27 | 1 | 16/03/2007 | 24/04/2007 | 02/02/2010 | 1 | 10,6 | 8 | 8 | 1 | 0 | 0 | 0,4 | 0 | 0 | 5 |
| 124 | 124 | 4871 | 22/05/1947 | 1 | 1 | 33,27 | 1 | 16/03/2007 | 24/04/2007 | 02/02/2010 | 1 | 10,6 | 8 | 8 | 1 | 0 | 0 | 0,4 | 0 | 0 | 5 |
| 125 | 125 | 4871 | 22/05/1947 | 1 | 1 | 33,27 | 1 | 16/03/2007 | 24/04/2007 | 02/02/2010 | 1 | 10,6 | 8 | 8 | 1 | 0 | 0 | 0,4 | 0 | 0 | 5 |
| 126 | 126 | 4871 | 22/05/1947 | 1 | 0 | 33,27 | 1 | 16/03/2007 | 24/04/2007 | 02/02/2010 | 1 | 10,6 | 8 | 8 | 1 | 0 | 0 | 0,4 | 0 | 0 | 5 |
| 127 | 127 | 4859 | 14/10/1949 | 0 | 0 | 90,90 | 0 | 07/03/2007 | 22/05/2007 | 19/12/2014 | 0 | 8,02 | 7 | 7 | 0 | 0 | 1 | 0,7 | 0 | 0 | 4 |
| 128 | 128 | 4859 | 14/10/1949 | 1 | 1 | 90,90 | 0 | 07/03/2007 | 22/05/2007 | 19/12/2014 | 0 | 8,02 | 7 | 7 | 0 | 0 | 1 | 0,7 | 0 | 0 | 4 |
| 129 | 129 | 4940 | 25/06/1939 | 0 | 0 | 84,20 | 0 | 29/03/2007 | 23/05/2007 | 29/05/2014 | 0 | 7,1  | 9 | 7 | 0 | 0 | 1 | 0,5 | 0 | 0 | 4 |
| 130 | 130 | 4940 | 25/06/1939 | 0 | 0 | 84,20 | 0 | 29/03/2007 | 23/05/2007 | 29/05/2014 | 0 | 7,1  | 9 | 7 | 0 | 0 | 1 | 0,5 | 0 | 0 | 4 |
| 131 | 131 | 4852 | 25/05/1942 | 0 | 2 | 78,63 | 0 | 28/02/2007 | 29/05/2007 | 18/12/2013 | 0 | 5,3  | 6 | 7 | 0 | 0 | 1 | 0,3 | 0 | 0 | 4 |
| 132 | 132 | 4852 | 25/05/1942 | 0 | 2 | 78,63 | 0 | 28/02/2007 | 29/05/2007 | 18/12/2013 | 0 | 5,3  | 6 | 7 | 0 | 0 | 1 | 0,3 | 0 | 0 | 4 |
| 133 | 133 | 4822 | 10/09/1951 | 1 | 1 | 84,37 | 0 | 08/02/2007 | 29/05/2007 | 10/06/2014 | 0 | 4,3  | 7 | 7 | 1 | 0 | 0 | 0,3 | 0 | 0 | 5 |
| 134 | 134 | 4822 | 10/09/1951 | 1 | 1 | 84,37 | 0 | 08/02/2007 | 29/05/2007 | 10/06/2014 | 0 | 4,3  | 7 | 7 | 1 | 0 | 0 | 0,3 | 0 | 0 | 5 |
| 135 | 135 | 4856 | 03/01/1951 | 1 | 1 | 7,77  | 0 | 01/03/2007 | 05/06/2007 | 28/01/2008 | 0 | 5,77 | 6 | 7 | 0 | 0 | 0 | 0,5 | 0 | 0 | 4 |
| 136 | 136 | 4856 | 03/01/1951 | 1 | 1 | 7,77  | 0 | 01/03/2007 | 05/06/2007 | 28/01/2008 | 0 | 5,77 | 6 | 7 | 0 | 0 | 0 | 0,5 | 0 | 0 | 4 |
| 137 | 137 | 4846 | 07/03/1948 | 1 | 1 | 77,23 | 0 | 27/02/2007 | 14/06/2007 | 21/11/2013 | 0 | 8    | 7 | 0 | 0 | 0 | 1 | 0,4 | 0 | 0 | 4 |
| 138 | 138 | 4846 | 07/03/1948 | 1 | 1 | 77,23 | 0 | 27/02/2007 | 14/06/2007 | 21/11/2013 | 0 | 8    | 7 | 0 | 0 | 0 | 1 | 0,4 | 0 | 0 | 4 |
| 139 | 139 | 4794 | 09/09/1937 | 0 | 0 | 92,50 | 0 | 19/01/2007 | 11/09/2007 | 26/05/2015 | 0 | 2,2  | 7 | 7 | 1 | 0 | 1 | 0,5 | 0 | 0 | 5 |
| 140 | 140 | 4794 | 09/09/1937 | 0 | 0 | 92,50 | 0 | 19/01/2007 | 11/09/2007 | 26/05/2015 | 0 | 2,2  | 7 | 7 | 1 | 0 | 1 | 0,5 | 0 | 0 | 5 |
| 141 | 141 | 4970 | 02/02/1950 | 1 | 3 | 71,13 | 1 | 26/07/2007 | 18/09/2007 | 22/08/2013 | 1 | 7,84 | 8 | 8 | 1 | 0 | 1 | 0,5 | 0 | 0 | 5 |
| 142 | 142 | 4970 | 02/02/1950 | 1 | 2 | 71,13 | 1 | 26/07/2007 | 18/09/2007 | 22/08/2013 | 1 | 7,84 | 8 | 8 | 1 | 0 | 1 | 0,5 | 0 | 0 | 5 |
| 143 | 143 | 4989 | 30/08/1942 | 1 | x | 66,73 | 0 | 28/08/2007 | 20/09/2007 | 12/04/2013 | 0 | 8,11 | 7 | 7 | 0 | 0 | 0 | 0,5 | 0 | 0 | 4 |
| 144 | 144 | 4989 | 30/08/1942 | 1 | 0 | 66,73 | 0 | 28/08/2007 | 20/09/2007 | 12/04/2013 | 0 | 8,11 | 7 | 7 | 0 | 0 | 0 | 0,5 | 0 | 0 | 4 |
| 145 | 145 | 5013 | 09/09/1942 | 1 | 1 | 64,60 | 1 | 21/12/2006 | 16/10/2007 | 04/03/2013 | 1 | 5,3  | 6 | 8 | 0 | 0 | 0 | 0,4 | 0 | 2 | 4 |
| 146 | 146 | 5013 | 09/09/1942 | 1 | 1 | 64,60 | 1 | 21/12/2006 | 16/10/2007 | 04/03/2013 | 1 | 5,3  | 6 | 8 | 0 | 0 | 0 | 0,4 | 0 | 2 | 4 |
| 147 | 147 | 4977 | 13/05/1960 | 1 | 2 | 6,13  | 0 | 13/08/2007 | 19/10/2007 | 23/04/2008 | 0 | 6,4  | 7 | 7 | 0 | 0 | 0 | 0,5 | 0 | 0 | 4 |
| 148 | 148 | 4977 | 13/05/1960 | 1 | 2 | 6,13  | 0 | 13/08/2007 | 19/10/2007 | 23/04/2008 | 0 | 6,4  | 7 | 7 | 0 | 0 | 0 | 0,5 | 0 | 0 | 4 |
| 149 | 149 | 5023 | 26/09/1938 | 1 | 2 | 23,87 | 0 | 01/11/2006 | 06/11/2007 | 02/11/2009 | 0 | 6    | 7 | 7 | 0 | 0 | 0 | 0,3 | 0 | 0 | 4 |
| 150 | 150 | 5023 | 26/09/1938 | 1 | 3 | 23,87 | 0 | 01/11/2006 | 06/11/2007 | 02/11/2009 | 0 | 6    | 7 | 7 | 0 | 0 | 0 | 0,3 | 0 | 0 | 4 |
| 151 | 151 | 5010 | 15/12/1955 | 1 | 1 | 87,23 | 0 | 04/10/2007 | 27/11/2007 | 04/03/2015 | 0 | 11,8 | 7 | 7 | 0 | 0 | 1 | 0,1 | 0 | 0 | 4 |
| 152 | 152 | 5010 | 15/12/1955 | 1 | 1 | 87,23 | 0 | 04/10/2007 | 27/11/2007 | 04/03/2015 | 0 | 11,8 | 7 | 7 | 0 | 0 | 1 | 0,1 | 0 | 0 | 4 |
| 153 | 153 | 5032 | 09/04/1947 | 0 | 2 |       | 0 |            | 04/12/2007 |            | 0 |      |   | 9 | 0 | 0 | 1 |     | 0 | 0 | 4 |
| 154 | 154 | 5032 | 09/04/1947 | 1 | 0 |       | 0 |            | 04/12/2007 |            | 0 |      |   | 9 | 0 | 0 | 1 |     | 0 | 0 | 4 |
| 155 | 155 | 5017 | 27/12/1956 | 1 | 2 | 57,77 | 1 | 29/10/2007 | 08/01/2008 | 31/10/2012 | 1 | 3,5  | 7 | 7 | 1 | 1 | 1 | 0,8 | 1 | 1 | 5 |
| 156 | 156 | 5017 | 27/12/1956 | 1 | 2 | 57,77 | 1 | 29/10/2007 | 08/01/2008 | 31/10/2012 | 1 | 3,5  | 7 | 7 | 1 | 1 | 1 | 0,8 | 1 | 1 | 5 |
| 157 | 157 | 5017 | 27/12/1956 | 0 | 2 | 57,77 | 1 | 29/10/2007 | 08/01/2008 | 31/10/2012 | 1 | 3,5  | 7 | 7 | 1 | 1 | 1 | 0,8 | 2 | 1 | 5 |
| 158 | 158 | 5017 | 27/12/1956 | 1 | 2 | 57,77 | 1 | 29/10/2007 | 08/01/2008 | 31/10/2012 | 1 | 3,5  | 7 | 7 | 1 | 1 | 1 | 0,8 | 1 | 1 | 5 |
| 159 | 159 | 5029 | 09/03/1956 | 1 | 3 | 82,67 | 0 | 26/11/2007 | 21/01/2008 | 11/12/2014 | 0 | 2,4  | 7 | 6 | 0 | 0 | 1 | 0,3 | 0 | 0 | 4 |
| 160 | 160 | 5029 | 09/03/1956 | 1 | 3 | 82,67 | 0 | 26/11/2007 | 21/01/2008 | 11/12/2014 | 0 | 2,4  | 7 | 6 | 0 | 0 | 1 | 0,3 | 0 | 0 | 4 |
| 161 | 161 | 4988 | 19/11/1947 | 0 | 1 | 51,00 | 1 | 28/08/2007 | 09/10/2007 | 09/01/2012 | 1 | 10,2 | 6 | 7 | 1 | 1 | 1 | 0,5 | 0 | 1 | 6 |
| 162 | 162 | 4988 | 19/11/1947 | 0 | 2 | 51,00 | 1 | 28/08/2007 | 09/10/2007 | 09/01/2012 | 1 | 10,2 | 6 | 7 | 1 | 1 | 1 | 0,5 | 0 | 1 | 6 |
| 163 | 163 | 5015 | 18/02/1947 | 1 | 0 | 0,43  | 0 | 22/10/2007 | 12/02/2008 | 25/02/2008 | 0 | 6,19 | 7 | 7 | 1 | 1 | 0 | 1,0 | 0 | 0 | 5 |
| 164 | 164 | 5015 | 18/02/1947 | 1 | 0 | 0,43  | 0 | 22/10/2007 | 12/02/2008 | 25/02/2008 | 0 | 6,19 | 7 | 7 | 1 | 1 | 0 | 1,0 | 0 | 0 | 5 |
| 165 | 165 | 4981 | 19/09/1935 | 0 | 3 | 29,33 | 0 | 16/08/2007 | 10/04/2008 | 20/09/2010 | 0 | 10,7 | 7 | 7 | 1 | 1 | 1 | 0,3 | 0 | 0 | 6 |
| 166 | 166 | 4981 | 19/09/1935 | 1 | 3 | 29,33 | 0 | 16/08/2007 | 10/04/2008 | 20/09/2010 | 0 | 10,7 | 7 | 7 | 1 | 1 | 1 | 0,3 | 0 | 0 | 6 |
| 167 | 167 | 5062 | 17/12/1946 | 1 | 3 | 5,70  | 1 | 02/05/2007 | 18/04/2008 | 09/10/2008 | 1 | 19,1 | 6 | 7 | 0 | 0 | 0 | 0,1 | 0 | 0 | 4 |
| 168 | 168 | 5062 | 17/12/1946 | 1 | 2 | 5,70  | 1 | 02/05/2007 | 18/04/2008 | 09/10/2008 | 1 | 19,1 | 6 | 7 | 0 | 0 | 0 | 0,1 | 0 | 0 | 4 |
| 169 | 169 | 5059 | 17/09/1945 | 1 | 2 | 83,67 | 0 | 11/02/2008 | 08/05/2008 | 28/04/2015 | 0 | 5,3  | 7 | 7 | 1 | 0 | 1 | 0,8 | 0 | 0 | 5 |
| 170 | 170 | 5059 | 17/09/1945 | 1 | 2 | 83,67 | 0 | 11/02/2008 | 08/05/2008 | 28/04/2015 | 0 | 5,3  | 7 | 7 | 1 | 0 | 1 | 0,8 | 0 | 0 | 5 |
| 171 | 171 | 5059 | 17/09/1945 | 1 | 2 | 83,67 | 0 | 11/02/2008 | 08/05/2008 | 28/04/2015 | 0 | 5,3  | 7 | 7 | 1 | 0 | 1 | 0,8 | 0 | 0 | 5 |
| 172 | 172 | 5059 | 17/09/1945 | 1 | 2 | 83,67 | 0 | 11/02/2008 | 08/05/2008 | 28/04/2015 | 0 | 5,3  | 7 | 7 | 1 | 0 | 1 | 0,8 | 0 | 0 | 5 |
| 173 | 173 | 5053 | 09/01/1940 | 1 | 1 | 20,67 | 1 | 24/01/2008 | 03/06/2008 | 23/02/2010 | 1 | 4,32 | 7 | 7 | 0 | 0 | 0 | 0,2 | 0 | 0 | 4 |
| 174 | 174 | 5053 | 09/01/1940 | 1 | 1 | 20,67 | 1 | 24/01/2008 | 03/06/2008 | 23/02/2010 | 1 | 4,32 | 7 | 7 | 0 | 0 | 0 | 0,2 | 0 | 0 | 4 |
| 175 | 175 | 5082 | 09/09/1939 | 1 | 2 | 22,83 | 0 | 01/04/2008 | 17/06/2008 | 12/05/2010 | 0 | 5,8  | 7 | 7 | 1 | 0 | 0 | 0,3 | 0 | 0 | 5 |

|     |     |      |            |   |   |        |   |            |            |            |   |      |   |   |   |   |   |     |   |   |   |
|-----|-----|------|------------|---|---|--------|---|------------|------------|------------|---|------|---|---|---|---|---|-----|---|---|---|
| 176 | 176 | 5082 | 09/09/1939 | 1 | 1 | 22.83  | 0 | 01/04/2008 | 17/06/2008 | 12/05/2010 | 0 | 5.8  | 7 | 7 | 1 | 0 | 0 | 0.3 | 0 | 0 | 5 |
| 178 | 1   | 3328 | 30/04/1941 | 1 | 2 | 141.90 | 0 | 01/11/2002 | 27/01/2003 | 24/11/2014 | 0 | 3.1  | 6 | 6 | 0 | 0 | 1 | 0.3 | 0 | 0 | 4 |
| 179 | 2   | 3328 | 30/04/1941 | 1 | x | 141.90 | 0 | 01/11/2002 | 27/01/2003 | 24/11/2014 | 0 | 3.1  | 6 | 6 | 0 | 0 | 1 | 0.3 | 0 | 0 | 4 |
| 180 | 3   | 3329 | 21/08/1949 | 1 | 1 | 53.37  | 0 | 01/11/2002 | 04/02/2003 | 15/07/2007 | 0 | 39   | 6 | 7 | 1 | 1 | 1 | 0.1 | 0 | 0 | 5 |
| 181 | 4   | 3329 | 21/08/1949 | 1 | 0 | 53.37  | 0 | 01/11/2002 | 04/02/2003 | 15/07/2007 | 0 | 39   | 6 | 7 | 1 | 1 | 1 | 0.1 | 0 | 0 | 5 |
| 182 | 5   | 3277 | 24/01/1932 | 1 | 0 | 60.30  | 1 | 18/09/2002 | 13/02/2003 | 22/02/2008 | 1 | 13   | 7 | 7 | 0 | 0 | 0 | 0.5 | 0 | 0 | 4 |
| 183 | 6   | 3277 | 24/01/1932 | 1 | 0 | 60.30  | 1 | 18/09/2002 | 13/02/2003 | 22/02/2008 | 1 | 13   | 7 | 7 | 0 | 0 | 0 | 0.5 | 0 | 0 | 4 |
| 184 | 7   | 3448 | 29/11/1957 | 1 | 0 | 0      | 0 | 15/01/2003 | 18/02/2003 |            | 0 | 7.5  | 7 | 7 | 0 | 0 | 1 | 0.5 | 0 | 0 | 4 |
| 185 | 8   | 3448 | 29/11/1957 | 1 | 1 | 0      | 0 | 15/01/2003 | 18/02/2003 |            | 0 | 7.5  | 7 | 7 | 0 | 0 | 1 | 0.5 | 0 | 0 | 4 |
| 186 | 9   | 3304 | 25/02/1934 | 1 | 1 | 0      | 0 | 09/10/2002 | 03/03/2003 |            | 0 | 9    | 6 |   | 0 | 0 | 1 | 0.3 | 0 | 0 | 4 |
| 187 | 10  | 3304 | 25/02/1934 | 1 | 0 | 0      | 0 | 09/10/2002 | 03/03/2003 |            | 0 | 9    | 6 |   | 0 | 0 | 1 | 0.3 | 0 | 0 | 4 |
| 188 | 11  | 3514 | 16/01/1950 | 1 | 2 | 18.03  | 0 | 08/04/2003 | 20/05/2003 | 21/11/2004 | 0 | 7.7  | 8 | 8 | 1 | 1 | 1 | 0.5 | 0 | 0 | 6 |
| 189 | 12  | 3514 | 16/01/1950 | 1 | 1 | 18.03  | 0 | 08/04/2003 | 20/05/2003 | 21/11/2004 | 0 | 7.7  | 8 | 8 | 1 | 1 | 1 | 0.5 | 0 | 0 | 6 |
| 190 | 13  | 3480 | 23/10/1933 | 1 | 0 | 62.27  | 0 | 23/09/2002 | 20/05/2003 | 28/07/2008 | 0 | 8.3  | 6 | 7 | 0 | 0 | 0 | 0.1 | 0 | 0 | 2 |
| 191 | 14  | 3480 | 23/10/1933 | 1 | 0 | 62.27  | 0 | 23/09/2002 | 20/05/2003 | 28/07/2008 | 0 | 8.3  | 6 | 7 | 0 | 0 | 0 | 0.1 | 0 | 0 | 2 |
| 192 | 15  | 3483 | 21/05/1955 | 1 | 1 | 0      | 0 | 04/04/2003 | 13/08/2003 |            | 0 | 3.4  | 7 | 7 | 0 | 0 | 1 | 0.3 | 0 | 0 | 4 |
| 193 | 16  | 3483 | 21/05/1955 | 1 | 1 | 0      | 0 | 04/04/2003 | 13/08/2003 |            | 0 | 3.4  | 7 | 7 | 0 | 0 | 1 | 0.3 | 0 | 0 | 4 |
| 194 | 17  | 3464 | 06/09/1939 | 1 | 1 | 0      | 0 | 05/03/2003 | 15/07/2003 |            | 0 | 16   | 6 | 7 | 0 | 0 | 0 | 0.6 | 0 | 0 | 4 |
| 195 | 18  | 3464 | 06/09/1939 | 1 | 1 | 0      | 0 | 05/03/2003 | 15/07/2003 |            | 0 | 16   | 6 | 7 | 0 | 0 | 0 | 0.6 | 0 | 0 | 4 |
| 196 | 19  | 3513 | 12/06/1949 | 1 | 2 | 86.00  | 0 | 20/05/2003 | 04/09/2003 | 04/11/2010 | 0 | 6.25 | 7 | 7 | 0 | 0 | 0 | 0.3 | 0 | 0 | 2 |
| 197 | 20  | 3513 | 12/06/1949 | 1 | 3 | 86.00  | 0 | 20/05/2003 | 04/09/2003 | 04/11/2010 | 0 | 6.25 | 7 | 7 | 0 | 0 | 0 | 0.3 | 0 | 0 | 2 |
| 198 | 21  | 3644 | 14/01/1939 | 1 | 1 | 0      | 0 |            | 30/09/2003 |            | 0 | 6.8  | 7 | 7 | 0 | 0 | 1 | 0   | 0 | 0 | 4 |
| 199 | 22  | 3644 | 14/01/1939 | 1 | 1 | 0      | 0 |            | 30/09/2003 |            | 0 | 6.8  | 7 | 7 | 0 | 0 | 1 | 0   | 0 | 0 | 4 |
| 200 | 23  | 4143 | 01/02/1937 | 1 | 2 | 109.70 | 0 | 22/03/2005 | 05/05/2005 | 26/06/2014 | 0 | 9.8  | 7 | 7 | 0 | 1 | 0 | 0.3 | 0 | 0 | 6 |
| 201 | 24  | 4143 | 01/02/1937 | 1 | 2 | 109.70 | 0 | 22/03/2005 | 05/05/2005 | 26/06/2014 | 0 | 9.8  | 7 | 7 | 0 | 1 | 0 | 0.3 | 0 | 0 | 6 |
| 202 | 25  | 3551 | 19/12/1936 | 1 | 0 | 0      | 0 | 19/06/2003 | 02/10/2003 |            | 0 | 6.1  | 7 | 7 | 0 | 0 | 1 | 0.6 | 0 | 0 | 4 |
| 203 | 26  | 3551 | 19/12/1936 | 1 | 0 | 0      | 0 | 19/06/2003 | 02/10/2003 |            | 0 | 6.1  | 7 | 7 | 0 | 0 | 1 | 0.6 | 0 | 0 | 4 |
| 204 | 27  | 3664 | 18/09/1936 | 1 | 0 | 0      | 0 | 16/05/2003 | 16/10/2003 |            | 0 | 3.2  | 6 | 7 | 1 | 0 | 0 | 0.8 | 0 | 0 | 5 |
| 205 | 28  | 3664 | 18/09/1936 | 1 | 1 | 0      | 0 | 16/05/2003 | 16/10/2003 |            | 0 | 3.2  | 6 | 7 | 1 | 0 | 0 | 0.8 | 0 | 0 | 5 |
| 206 | 29  | 3711 | 11/11/1941 | 1 | 2 | 24.50  | 1 | 11/08/2003 | 04/12/2003 | 19/12/2005 | 1 | 5.7  | 6 | 7 | 0 | 0 | 0 | 0.2 | 0 | 0 | 4 |
| 207 | 30  | 3711 | 11/11/1941 | 1 | 0 | 24.50  | 1 | 11/08/2003 | 04/12/2003 | 19/12/2005 | 1 | 5.7  | 6 | 7 | 0 | 0 | 0 | 0.2 | 0 | 0 | 4 |
| 208 | 31  | 4322 | 26/05/1942 | 1 | 2 | 42.13  | 1 | 26/10/2005 | 03/01/2006 | 07/07/2009 | 1 | 20   | 6 | 7 | 1 | 1 | 0 | 0.6 | 0 | 0 | 6 |
| 209 | 32  | 4322 | 26/05/1942 | 1 | 2 | 42.13  | 1 | 26/10/2005 | 03/01/2006 | 07/07/2009 | 1 | 20   | 6 | 7 | 1 | 1 | 0 | 0.6 | 0 | 0 | 6 |
| 210 | 33  | 3000 | 19/03/1943 | 1 | 1 | 85.50  | 0 | 02/10/2001 | 18/04/2002 | 03/06/2009 | 0 | 6.46 | 6 |   | 0 | 0 | 0 | 0.5 | 1 | 0 | 4 |
| 211 | 34  | 3000 | 19/03/1943 | 1 | 1 | 85.50  | 0 | 02/10/2001 | 18/04/2002 | 03/06/2009 | 0 | 6.46 | 6 |   | 0 | 0 | 0 | 0.5 | 1 | 0 | 4 |
| 212 | 35  | 2950 | 08/09/1931 | 1 | x | 125.47 | 1 | 01/08/2001 | 25/04/2002 | 09/10/2012 | 1 | 2.2  | 7 | 7 | 0 | 0 | 1 | 0.5 | 1 | 0 | 4 |
| 213 | 36  | 2950 | 08/09/1931 | 1 | x | 125.47 | 1 | 01/08/2001 | 25/04/2002 | 09/10/2012 | 1 | 2.2  | 7 | 7 | 0 | 0 | 1 | 0.5 | 1 | 0 | 4 |
| 214 | 37  | 2732 | 22/01/1941 | 1 | 2 | 74.80  | 0 | 23/11/2000 | 22/02/2001 | 16/05/2007 | 0 | 9.4  | 8 | 7 | 0 | 0 | 1 | 0.3 | 1 | 0 | 4 |
| 215 | 38  | 2732 | 22/01/1941 | 1 | 2 | 74.80  | 0 | 23/11/2000 | 22/02/2001 | 16/05/2007 | 0 | 9.4  | 8 | 7 | 0 | 0 | 1 | 0.3 | 1 | 0 | 4 |
| 216 | 39  | 3082 | 13/06/1946 | 1 | 3 | 90.47  | 1 | 18/01/2002 | 30/05/2002 | 14/12/2009 | 1 | 8.35 | 7 |   | 1 | 0 | 0 | 1.0 | 1 | 0 | 5 |
| 217 | 40  | 3082 | 13/06/1946 | 1 | 1 | 90.47  | 1 | 18/01/2002 | 30/05/2002 | 14/12/2009 | 1 | 8.35 | 7 |   | 1 | 0 | 0 | 1.0 | 1 | 0 | 5 |
| 218 | 41  | 3451 | 20/06/1941 | 1 | x | 66.83  | 0 | 20/02/2003 | 15/07/2003 | 10/02/2009 | 0 | 15.1 | 6 | 6 | 0 | 0 | 0 | 0.1 | 1 | 0 | 2 |
| 219 | 42  | 3451 | 20/06/1941 | 1 | x | 66.83  | 0 | 20/02/2003 | 15/07/2003 | 10/02/2009 | 0 | 15.1 | 6 | 6 | 0 | 0 | 0 | 0.1 | 1 | 0 | 2 |
| 220 | 43  | 3542 | 10/04/1940 | 1 | 1 | 29.33  | 1 | 10/06/2003 | 04/09/2003 | 14/02/2006 | 1 | 15.6 | 8 | 7 | 1 | 0 | 0 | 0.1 | 1 | 0 | 5 |
| 221 | 44  | 3542 | 10/04/1940 | 1 | 1 | 29.33  | 1 | 10/06/2003 | 04/09/2003 | 14/02/2006 | 1 | 15.6 | 8 | 7 | 1 | 0 | 0 | 0.1 | 1 | 0 | 5 |
| 222 | 45  | 3434 | 12/07/1935 | 1 | 1 | 48.07  | 1 | 06/02/2003 | 29/07/2003 | 01/08/2007 | 1 | 13.7 | 9 | 9 | 0 | 1 | 1 | 1.0 | 1 | 2 | 6 |
| 223 | 46  | 3434 | 12/07/1935 | 1 | 1 | 48.07  | 1 | 06/02/2003 | 29/07/2003 | 01/08/2007 | 1 | 13.7 | 9 | 9 | 0 | 1 | 1 | 1.0 | 1 | 2 | 6 |
| 224 | 47  | 3337 | 28/04/1931 | 1 | 0 | 28.20  | 1 | 06/11/2002 | 11/02/2003 | 17/06/2005 | 1 | 9    | 7 | 9 | 1 | 1 | 1 | 0.8 | 1 | 2 | 6 |
| 225 | 48  | 3337 | 28/04/1931 | 1 | x | 28.20  | 1 | 06/11/2002 | 11/02/2003 | 17/06/2005 | 1 | 9    | 7 | 9 | 1 | 1 | 1 | 0.8 | 1 | 2 | 6 |
| 226 | 49  | 3470 | 08/02/1940 | 1 | 1 | 59.97  | 0 | 18/03/2003 | 29/04/2003 | 28/04/2008 | 0 | 4.61 | 8 | 7 | 0 | 0 | 1 | 0.5 | 1 | 0 | 2 |
| 227 | 50  | 3470 | 08/02/1940 | 1 | 2 | 59.97  | 0 | 18/03/2003 | 29/04/2003 | 28/04/2008 | 0 | 4.61 | 8 | 7 | 0 | 0 | 1 | 0.5 | 1 | 0 | 2 |
| 228 | 51  | 3211 | 20/11/1936 | 1 | x | 0      | 0 | 26/06/2002 | 29/10/2002 |            | 0 | 5.1  | 7 | 6 | 1 | 0 | 0 | 0.3 | 1 | 0 | 5 |
| 229 | 52  | 3211 | 20/11/1936 | 1 | 1 | 0      | 0 | 26/06/2002 | 29/10/2002 |            | 0 | 5.1  | 7 | 6 | 1 | 0 | 0 | 0.3 | 1 | 0 | 5 |
| 230 | 53  | 3375 | 18/05/1934 | 1 | 1 | 60.20  | 0 | 09/12/2002 | 06/05/2003 | 12/05/2008 | 0 | 6.1  | 7 |   | 0 | 0 | 0 | 0.5 | 1 | 0 | 4 |
| 231 | 54  | 3375 | 18/05/1934 | 1 | 1 | 60.20  | 0 | 09/12/2002 | 06/05/2003 | 12/05/2008 | 0 | 6.1  | 7 |   | 0 | 0 | 0 | 0.5 | 1 | 0 | 4 |
| 232 | 55  | 3188 | 14/05/1943 | 1 | 1 | 0      | 0 | 24/05/2002 | 01/10/2002 |            | 0 | 8.1  | 6 | 7 | 0 | 0 | 1 | 0.5 | 0 | 0 | 4 |
| 233 | 56  | 3188 | 14/05/1943 | 1 | 1 | 0      | 0 | 24/05/2002 | 01/10/2002 |            | 0 | 8.1  | 6 | 7 | 0 | 0 | 1 | 0.5 | 0 | 0 | 4 |
| 234 | 57  | 3759 | 10/04/1940 | 1 | 2 | 78.90  | 0 | 01/01/2004 | 21/10/2004 | 18/05/2011 | 0 | 24   | 7 | 7 | 0 | 0 | 0 | 0.6 | 1 | 0 | 4 |
| 235 | 58  | 3759 | 10/04/1940 | 1 | 1 | 78.90  | 0 | 01/01/2004 | 21/10/2004 | 18/05/2011 | 0 | 24   | 7 | 7 | 0 | 0 | 0 | 0.6 | 1 | 0 | 4 |
| 236 | 59  | 3887 | 18/11/1955 | 1 | 0 | 76.60  | 0 | 17/06/2004 | 31/03/2005 | 18/08/2011 | 0 | 17.5 | 7 | 7 | 0 | 0 | 0 | 1.0 | 1 | 0 | 4 |
| 237 | 60  | 3887 | 18/11/1955 | 1 | 1 | 76.60  | 0 | 17/06/2004 | 31/03/2005 | 18/08/2011 | 0 | 17.5 | 7 | 7 | 0 | 0 | 0 | 1.0 | 1 | 0 | 4 |

|     |     |      |            |   |   |        |   |            |            |            |   |      |   |   |   |   |   |     |   |   |   |
|-----|-----|------|------------|---|---|--------|---|------------|------------|------------|---|------|---|---|---|---|---|-----|---|---|---|
| 238 | 61  | 4312 | 10/02/1941 | 1 | 2 | 35.13  | 0 | 18/10/2005 | 08/06/2006 | 12/05/2009 | 0 | 5,8  | 9 | 0 | 0 | 0 | 0 | 0,4 | 1 | 0 | 2 |
| 239 | 62  | 4312 | 10/02/1941 | 1 | 1 | 35.13  | 0 | 18/10/2005 | 08/06/2006 | 12/05/2009 | 0 | 5,8  | 9 | 0 | 0 | 0 | 0 | 0,4 | 1 | 0 | 2 |
| 240 | 63  | 2732 | 22/01/1941 | 1 | 2 | 74,80  | 0 | 23/11/2000 | 22/02/2001 | 16/05/2007 | 0 | 9,4  | 8 | 7 | 0 | 0 | 1 | 0,3 | 1 | 0 | 4 |
| 241 | 64  | 2732 | 22/01/1941 | 1 | 2 | 74,80  | 0 | 23/11/2000 | 22/02/2001 | 16/05/2007 | 0 | 9,4  | 8 | 7 | 0 | 0 | 1 | 0,3 | 1 | 0 | 4 |
| 242 | 65  | 3010 | 21/07/1928 | 1 | 1 |        |   | 11/10/2001 | 19/03/2002 |            | 1 | 12,2 | 9 | 0 | 0 | 0 | 0 | 0,4 | 2 | 0 | 2 |
| 243 | 66  | 3010 | 21/07/1928 | 1 | 1 |        |   | 11/10/2001 | 19/03/2002 |            | 1 | 12,2 | 9 | 0 | 0 | 0 | 0 | 0,4 | 2 | 0 | 2 |
| 244 | 67  | 3290 | 21/09/1938 | 1 | x | 80,33  | 0 | 22/09/2002 | 04/02/2003 | 14/10/2009 | 0 | 9,27 | 7 | 0 | 0 | 0 | 1 | 0,3 | 1 | 0 | 4 |
| 245 | 68  | 3290 | 21/09/1938 | 1 | 0 | 80,33  | 0 | 22/09/2002 | 04/02/2003 | 14/10/2009 | 0 | 9,27 | 7 | 0 | 0 | 0 | 1 | 0,3 | 1 | 0 | 4 |
| 246 | 69  | 3116 | 05/05/1936 | 1 | 1 | 123,27 | 0 | 01/08/2001 | 21/02/2002 | 29/05/2012 | 0 | 6,3  | 7 | 0 | 0 | 0 | 0 | 0,8 | 1 | 0 | 4 |
| 247 | 70  | 3116 | 05/05/1936 | 1 | 1 | 123,27 | 0 | 01/08/2001 | 21/02/2002 | 29/05/2012 | 0 | 6,3  | 7 | 0 | 0 | 0 | 0 | 0,8 | 1 | 0 | 4 |
| 248 | 71  | 4062 | 19/04/1951 | 1 | x | 23,90  | 0 | 07/01/2005 | 02/05/2006 | 29/04/2008 | 0 | 5,7  | 7 | 7 | 0 | 0 | 0 | 0,5 | 1 | 0 | 4 |
| 249 | 72  | 4062 | 19/04/1951 | 1 | x | 23,90  | 0 | 07/01/2005 | 02/05/2006 | 29/04/2008 | 0 | 5,7  | 7 | 7 | 0 | 0 | 0 | 0,5 | 1 | 0 | 4 |
| 250 | 73  | 4070 | 27/04/1934 | 1 | 0 | 53,10  | 1 | 13/01/2005 | 04/08/2005 | 07/01/2010 | 1 | 13   | 9 | 7 | 0 | 0 | 0 | 0,9 | 1 | 0 | 4 |
| 251 | 74  | 4070 | 27/04/1934 | 1 | 1 | 53,10  | 1 | 13/01/2005 | 04/08/2005 | 07/01/2010 | 1 | 13   | 9 | 7 | 0 | 0 | 0 | 0,9 | 1 | 0 | 4 |
| 252 | 75  | 3561 | 23/04/1942 | 1 | 1 | 38,00  | 1 | 19/06/2003 | 06/05/2004 | 06/07/2007 | 1 | 8,4  | 9 | 1 | 1 | 1 | 1 | 0,5 | 1 | 0 | 6 |
| 253 | 76  | 3561 | 23/04/1942 | 1 | 1 | 38,00  | 1 | 19/06/2003 | 06/05/2004 | 06/07/2007 | 1 | 8,4  | 9 | 1 | 1 | 1 | 1 | 0,5 | 1 | 0 | 6 |
| 254 | 77  | 2972 | 10/11/1929 | 1 | 2 | 99,13  | 0 | 04/09/2001 | 06/08/2002 | 10/11/2010 | 0 | 16,1 | 6 | 6 | 0 | 0 | 0 | 0,2 | 1 | 0 | 4 |
| 255 | 78  | 2972 | 10/11/1929 | 1 | 2 | 99,13  | 0 | 04/09/2001 | 06/08/2002 | 10/11/2010 | 0 | 16,1 | 6 | 6 | 0 | 0 | 0 | 0,2 | 1 | 0 | 4 |
| 256 | 79  | 2934 | 14/12/1935 | 1 | x | 144,17 | 0 | 12/07/2001 | 23/04/2002 | 28/04/2014 | 0 | 5,5  | 7 | 0 | 0 | 0 | 0 | 0,7 | 1 | 0 | 4 |
| 257 | 80  | 2934 | 14/12/1935 | 1 | 1 | 144,17 | 0 | 12/07/2001 | 23/04/2002 | 28/04/2014 | 0 | 5,5  | 7 | 0 | 0 | 0 | 0 | 0,7 | 1 | 0 | 4 |
| 258 | 81  | 3498 | 30/08/1943 | 1 | 1 | 7,97   | 1 |            | 01/05/2003 | 30/12/2003 | 1 | 18   | 6 | 7 | 1 | 0 | 1 | 0   | 1 | 0 | 5 |
| 259 | 82  | 3498 | 30/08/1943 | 1 | 2 | 7,97   | 1 |            | 01/05/2003 | 30/12/2003 | 1 | 18   | 6 | 7 | 1 | 0 | 1 | 0   | 1 | 0 | 5 |
| 260 | 83  | 3355 | 05/07/1940 | 1 | x | 60,67  | 0 | 21/11/2002 | 10/06/2003 | 30/06/2008 | 0 | 8,8  | 5 | 6 | 0 | 0 | 0 | 0,1 | 1 | 0 | 4 |
| 261 | 84  | 3355 | 05/07/1940 | 1 | x | 60,67  | 0 | 21/11/2002 | 10/06/2003 | 30/06/2008 | 0 | 8,8  | 5 | 6 | 0 | 0 | 0 | 0,1 | 1 | 0 | 4 |
| 262 | 85  | 3570 | 14/05/1941 | 1 | 2 | 58,90  | 1 | 15/07/2003 | 29/04/2004 | 26/03/2009 | 1 | 12,3 | 7 | 7 | 1 | 1 | 1 | 1,0 | 1 | 0 | 6 |
| 263 | 86  | 3570 | 14/05/1941 | 1 | 1 | 58,90  | 1 | 15/07/2003 | 29/04/2004 | 26/03/2009 | 1 | 12,3 | 7 | 7 | 1 | 1 | 1 | 1,0 | 1 | 0 | 6 |
| 264 | 87  | 3954 | 15/07/1955 | 1 | 1 | 24,83  | 1 | 14/09/2004 | 19/05/2005 | 14/06/2007 | 1 | 40   | 9 | 1 | 0 | 0 | 0 | 0,5 | 1 | 0 | 5 |
| 265 | 88  | 3954 | 15/07/1955 | 1 | 2 | 24,83  | 1 | 14/09/2004 | 19/05/2005 | 14/06/2007 | 1 | 40   | 9 | 1 | 0 | 0 | 0 | 0,5 | 1 | 0 | 5 |
| 266 | 89  | 2334 | 17/09/1936 | 1 | 2 | 110,17 | 1 | 27/04/1999 | 14/02/2002 | 19/04/2011 | 1 | 11,7 | 6 | 0 | 0 | 1 | 0 | 0,5 | 1 | 0 | 4 |
| 267 | 90  | 2334 | 17/09/1936 | 1 | 1 | 110,17 | 1 | 27/04/1999 | 14/02/2002 | 19/04/2011 | 1 | 11,7 | 6 | 0 | 0 | 1 | 0 | 0,5 | 1 | 0 | 4 |
| 268 | 91  | 2912 | 04/02/1934 | 1 | 2 |        | 0 | 14/06/2001 | 07/03/2002 |            | 0 | 13   | 6 |   | 1 | 0 | 0 | 0,3 | 1 | 0 | 5 |
| 269 | 92  | 2912 | 04/02/1934 | 1 | 2 |        | 0 | 14/06/2001 | 07/03/2002 |            | 0 | 13   | 6 |   | 1 | 0 | 0 | 0,3 | 1 | 0 | 5 |
| 270 | 93  | 2854 | 03/07/1945 | 1 | 1 | 15,27  | 1 | 30/03/2001 | 18/04/2002 | 26/07/2003 | 1 | 25   | 6 | 6 | 1 | 0 | 1 | 0,3 | 1 | 0 | 5 |
| 271 | 94  | 2854 | 03/07/1945 | 1 | 1 | 15,27  | 1 | 30/03/2001 | 18/04/2002 | 26/07/2003 | 1 | 25   | 6 | 6 | 1 | 0 | 1 | 0,3 | 1 | 0 | 5 |
| 272 | 95  | 2976 | 07/01/1953 | 1 | 2 | 46,23  | 1 | 07/09/2001 | 16/05/2002 | 23/03/2006 | 1 | 10,8 | 7 | 7 | 0 | 0 | 0 | 0,5 | 1 | 0 | 4 |
| 273 | 96  | 2976 | 07/01/1953 | 1 | 2 | 46,23  | 1 | 07/09/2001 | 16/05/2002 | 23/03/2006 | 1 | 10,8 | 7 | 7 | 0 | 0 | 0 | 0,5 | 1 | 0 | 4 |
| 274 | 97  | 2967 | 04/05/1948 | 1 | 1 | 25,03  | 1 | 30/08/2001 | 04/06/2002 | 05/07/2004 | 1 | 14,7 | 7 | 1 | 1 | 0 | 0 | 0,8 | 1 | 2 | 5 |
| 275 | 98  | 2967 | 04/05/1948 | 1 | 1 | 25,03  | 1 | 30/08/2001 | 04/06/2002 | 05/07/2004 | 1 | 14,7 | 7 | 1 | 1 | 0 | 0 | 0,8 | 1 | 2 | 5 |
| 276 | 99  | 2956 | 30/03/1949 | 1 | 2 | 41,30  | 1 | 16/08/2001 | 06/06/2002 | 15/11/2005 | 1 | 6,2  | 7 | 7 | 1 | 0 | 0 | 0,4 | 1 | 0 | 6 |
| 277 | 100 | 2956 | 30/03/1949 | 1 | 2 | 41,30  | 1 | 16/08/2001 | 06/06/2002 | 15/11/2005 | 1 | 6,2  | 7 | 7 | 1 | 0 | 0 | 0,4 | 1 | 0 | 6 |
| 278 | 101 | 3496 | 17/01/1936 | 1 | 1 | 135,00 | 1 | 30/04/2003 | 02/12/2003 | 02/03/2015 | 1 | 39,2 | 7 | 0 | 0 | 0 | 0 | 0,5 | 1 | 0 | 4 |
| 279 | 102 | 3496 | 17/01/1936 | 1 | 1 | 135,00 | 1 | 30/04/2003 | 02/12/2003 | 02/03/2015 | 1 | 39,2 | 7 | 0 | 0 | 0 | 0 | 0,5 | 1 | 0 | 4 |
| 280 | 103 | 4085 | 14/03/1936 | 1 | 2 | 25,67  | 0 | 26/01/2005 | 01/12/2005 | 21/01/2008 | 0 | 15,6 | 7 | 7 | 0 | 0 | 0 | 0,3 | 1 | 0 | 4 |
| 281 | 104 | 4085 | 14/03/1936 | 1 | 2 | 25,67  | 0 | 26/01/2005 | 01/12/2005 | 21/01/2008 | 0 | 15,6 | 7 | 7 | 0 | 0 | 0 | 0,3 | 1 | 0 | 4 |
| 282 | 105 | 3731 | 03/06/1943 | 1 | x | 83,27  | 0 | 30/12/2003 | 16/11/2004 | 24/10/2011 | 0 | 7    | 7 | 0 | 0 | 0 | 0 | 0,9 | 1 | 0 | 4 |
| 283 | 106 | 3731 | 03/06/1943 | 1 | x | 83,27  | 0 | 30/12/2003 | 16/11/2004 | 24/10/2011 | 0 | 7    | 7 | 0 | 0 | 0 | 0 | 0,9 | 1 | 0 | 4 |
| 284 | 107 | 3885 | 16/01/1937 | 1 | 3 | 122,67 | 0 | 17/06/2004 | 01/03/2005 | 21/05/2015 | 0 | 4,3  | 9 | 9 | 1 | 1 | 1 | 1,0 | 1 | 0 | 6 |
| 285 | 108 | 3885 | 16/01/1937 | 1 | 3 | 122,67 | 0 | 17/06/2004 | 01/03/2005 | 21/05/2015 | 0 | 4,3  | 9 | 9 | 1 | 1 | 1 | 1,0 | 1 | 0 | 6 |
| 286 | 109 | 2910 | 18/06/1944 | 1 | 1 | 43,40  | 1 | 14/06/2001 | 28/02/2002 | 12/10/2005 | 1 | 10,4 | 8 | 1 | 1 | 0 | 0 | 0,6 | 1 | 0 | 6 |
| 287 | 110 | 2910 | 18/06/1944 | 1 | x | 43,40  | 1 | 14/06/2001 | 28/02/2002 | 12/10/2005 | 1 | 10,4 | 8 | 1 | 1 | 0 | 0 | 0,6 | 1 | 0 | 6 |
| 288 | 111 | 3744 | 11/04/1953 | 1 | 1 | 13,00  | 1 | 19/01/2004 | 14/10/2004 | 14/11/2005 | 1 | 32,5 | 9 | 1 | 1 | 1 | 1 | 1,0 | 1 | 2 | 7 |
| 289 | 112 | 3744 | 11/04/1953 | 1 | 0 | 13,00  | 1 | 19/01/2004 | 14/10/2004 | 14/11/2005 | 1 | 32,5 | 9 | 1 | 1 | 1 | 1 | 1,0 | 1 | 2 | 7 |
| 290 | 113 | 3609 | 22/02/1946 | 1 | 0 |        | 0 |            | 26/08/2003 |            | 0 | 8    | 7 | 0 | 0 | 0 | 0 | 0   | 0 | 0 | 4 |
| 291 | 114 | 3609 | 22/02/1946 | 1 | 0 |        | 0 |            | 26/08/2003 |            | 0 | 8    | 7 | 0 | 0 | 0 | 0 | 0   | 0 | 0 | 4 |
| 292 | 115 | 4060 | 07/01/1934 | 1 | 1 | 25,20  | 1 | 06/01/2005 | 15/09/2005 | 21/10/2007 | 1 | 14   | 9 | 1 | 1 | 0 | 0 | 0,9 | 1 | 0 | 6 |
| 293 | 116 | 4060 | 07/01/1934 | 1 | x | 25,20  | 1 | 06/01/2005 | 15/09/2005 | 21/10/2007 | 1 | 14   | 9 | 1 | 1 | 0 | 0 | 0,9 | 1 | 0 | 6 |
| 294 | 117 | 3210 | 23/02/1950 | 1 | 2 | 12,80  | 0 |            | 20/06/2002 | 14/07/2003 | 0 | 2,3  | 6 | 6 | 0 | 0 | 0 |     | 1 | 0 | 4 |
| 295 | 118 | 3210 | 23/02/1950 | 1 | 2 | 12,80  | 0 |            | 20/06/2002 | 14/07/2003 | 0 | 2,3  | 6 | 6 | 0 | 0 | 0 |     | 1 | 0 | 4 |
| 296 | 119 | 2890 | 11/04/1941 | 1 | 1 | 21,67  | 1 | 11/05/2001 | 05/02/2002 | 25/11/2003 | 1 | 30   | 6 | 6 | 0 | 0 | 0 | 1,0 | 1 | 0 | 6 |
| 297 | 120 | 2890 | 11/04/1941 | 1 | 2 | 21,67  | 1 | 11/05/2001 | 05/02/2002 | 25/11/2003 | 1 | 30   | 6 | 6 | 0 | 0 | 0 | 1,0 | 1 | 0 | 6 |
| 298 | 121 | 3662 | 05/05/1936 | 1 | 1 | 10,53  | 1 | 16/10/2003 | 24/09/2004 | 10/08/2005 | 1 | 35   | 7 | 7 | 0 | 1 | 0 | 0,7 | 1 | 0 | 6 |
| 299 | 122 | 3662 | 05/05/1936 | 1 | 1 | 10,53  | 1 | 16/10/2003 | 24/09/2004 | 10/08/2005 | 1 | 35   | 7 | 7 | 0 | 1 | 0 | 0,7 | 1 | 0 | 6 |
| 300 | 123 | 4051 | 29/12/1939 | 1 | 0 |        | 0 | 21/12/2004 | 05/05/2005 |            | 0 | 4,6  | 7 | 8 | 1 | 1 | 1 | 0,8 | 0 | 0 | 6 |
| 301 | 124 | 4051 | 29/12/1939 | 1 | 0 |        | 0 | 21/12/2004 | 05/05/2005 |            | 0 | 4,6  | 7 | 8 | 1 | 1 | 1 | 0,8 | 0 | 0 | 6 |
| 302 | 125 | 3190 | 12/06/1934 | 1 | x | 112,67 | 0 | 29/05/2002 | 11/03/2003 | 01/08/2012 | 0 | 8,2  | 7 | 0 | 0 | 0 | 0 | 0,6 | 1 | 0 | 4 |
| 303 | 126 | 3190 | 12/06/1934 | 1 | 1 | 112,67 | 0 | 29/05/2002 | 11/03/2003 | 01/08/2012 | 0 | 8,2  | 7 | 0 | 0 | 0 | 0 | 0,6 | 1 | 0 | 4 |
| 304 | 127 | 3166 | 28/10/1936 | 1 | x | 28,93  | 1 | 25/04/2002 | 03/04/2003 | 31/08/2005 | 1 | 8,9  | 7 | 1 | 0 | 0 | 0 | 0,8 | 1 | 0 | 5 |
| 305 | 128 |      |            |   |   |        |   |            |            |            |   |      |   |   |   |   |   |     |   |   |   |

|     |     |      |            |   |   |        |            |            |            |            |   |      |   |   |     |   |     |   |
|-----|-----|------|------------|---|---|--------|------------|------------|------------|------------|---|------|---|---|-----|---|-----|---|
| 306 | 129 | 3660 | 10/01/1934 | 1 | 1 | 0      | 15/11/2002 | 14/10/2003 | 0          | 8,8        | 9 | 0    | 0 | 0 | 0,1 | 0 | 0   | 2 |
| 307 | 130 | 3660 | 10/01/1934 | 1 | 1 | 0      | 15/11/2002 | 14/10/2003 | 0          | 8,8        | 9 | 0    | 0 | 0 | 0,1 | 0 | 0   | 2 |
| 308 | 131 | 3333 | 03/08/1941 | 1 | 1 | 56,97  | 1          | 05/11/2002 | 18/09/2003 | 17/06/2008 | 1 | 9,8  | 9 | 9 | 1   | 1 | 1   | 6 |
| 309 | 132 | 3333 | 03/08/1941 | 1 | 1 | 56,97  | 1          | 05/11/2002 | 18/09/2003 | 17/06/2008 | 1 | 9,8  | 9 | 9 | 1   | 1 | 1   | 6 |
| 310 | 133 | 3159 | 07/05/1949 | 1 | 1 | 7,83   | 1          | 18/04/2002 | 12/06/2003 | 07/02/2004 | 1 | 7    | 0 | 0 | 0,7 | 0 | 0   | 4 |
| 311 | 134 | 3159 | 07/05/1949 | 1 | 1 | 7,83   | 1          | 18/04/2002 | 12/06/2003 | 07/02/2004 | 1 | 7    | 0 | 0 | 0,7 | 0 | 0   | 4 |
| 312 | 135 | 3039 | 13/09/1942 | 1 | 2 | 19,47  | 1          | 19/11/2001 | 12/12/2002 | 26/07/2004 | 1 | 42,9 | 8 | 1 | 1   | 1 | 1   | 6 |
| 313 | 136 | 3039 | 13/09/1942 | 1 | 0 | 19,47  | 1          | 19/11/2001 | 12/12/2002 | 26/07/2004 | 1 | 42,9 | 8 | 1 | 1   | 1 | 1   | 6 |
| 314 | 137 | 3057 | 15/10/1941 | 1 | 1 | 112,13 | 1          | 15/12/2001 | 28/11/2002 | 02/04/2012 | 1 | 8,53 | 9 | 0 | 1   | 0 | 1   | 6 |
| 315 | 138 | 3057 | 15/10/1941 | 1 | 1 | 112,13 | 1          | 15/12/2001 | 28/11/2002 | 02/04/2012 | 1 | 8,53 | 9 | 0 | 1   | 0 | 1   | 6 |
| 316 | 139 | 3819 | 26/06/1939 | 1 | 1 | 87,87  | 0          | 01/03/2004 | 22/12/2004 | 18/04/2012 | 0 | 13   | 7 | 0 | 0   | 0 | 0   | 4 |
| 317 | 140 | 3819 | 26/06/1939 | 1 | 0 | 87,87  | 0          | 01/03/2004 | 22/12/2004 | 18/04/2012 | 0 | 13   | 7 | 0 | 0   | 0 | 0   | 4 |
| 318 | 141 | 3031 | 05/02/1946 | 1 | 0 | 16,13  | 1          | 07/11/2001 | 13/06/2002 | 17/10/2003 | 1 | 7    | 6 | 1 | 0   | 1 | 0   | 5 |
| 319 | 142 | 3031 | 05/02/1946 | 1 | 1 | 16,13  | 1          | 07/11/2001 | 13/06/2002 | 17/10/2003 | 1 | 7    | 6 | 1 | 1   | 1 | 0   | 5 |
| 320 | 143 | 2643 | 04/12/1942 | 1 | x | 13,73  | 1          | 28/06/2000 | 22/03/2001 | 14/05/2002 | 1 | 16,2 | 7 | 1 | 1   | 0 | 0   | 6 |
| 321 | 144 | 2643 | 04/12/1942 | 1 | x | 13,73  | 1          | 28/06/2000 | 22/03/2001 | 14/05/2002 | 1 | 16,2 | 7 | 1 | 1   | 0 | 0   | 6 |
| 322 | 145 | 2566 | 12/08/1947 | 1 | x | 8,23   | 1          | 31/03/2000 | 11/01/2001 | 18/09/2011 | 1 | 22,9 | 9 | 1 | 0   | 0 | 0   | 5 |
| 323 | 146 | 2566 | 12/08/1947 | 1 | 1 | 8,23   | 1          | 31/03/2000 | 11/01/2001 | 18/09/2011 | 1 | 22,9 | 9 | 1 | 0   | 0 | 0   | 5 |
| 324 | 147 | 2740 | 28/02/1940 | 1 | 2 | 13,30  | 1          | 30/11/2000 | 22/11/2001 | 01/01/2003 | 1 | 35,1 | 7 | 1 | 1   | 0 | 1   | 6 |
| 325 | 148 | 2740 | 28/02/1940 | 1 | 2 | 13,30  | 1          | 30/11/2000 | 22/11/2001 | 01/01/2003 | 1 | 35,1 | 7 | 1 | 1   | 0 | 1   | 6 |
| 326 | 149 | 3246 | 10/11/1936 | 1 | 1 | 48,63  | 1          | 19/08/2002 | 12/11/2002 | 01/12/2006 | 1 | 17   | 8 | 9 | 1   | 1 | 1   | 6 |
| 327 | 150 | 3246 | 10/11/1936 | 1 | 2 | 48,63  | 1          | 19/08/2002 | 12/11/2002 | 01/12/2006 | 1 | 17   | 8 | 9 | 1   | 1 | 1   | 6 |
| 328 | 151 | 4566 | 03/03/1938 | 1 | 1 | 256,13 | 1          | 01/01/1990 | 05/05/2011 | 05/05/2011 | 1 | 8    | 1 | 1 | 1   | 1 | 1   | 7 |
| 329 | 152 | 4566 | 03/03/1938 | 1 | 2 | 256,13 | 1          | 01/01/1990 | 05/05/2011 | 05/05/2011 | 1 | 8    | 1 | 1 | 1   | 1 | 1   | 7 |
| 330 | 153 | 3392 | 08/05/1912 | 1 | 2 |        | 1          |            |            |            | 1 |      |   |   |     |   | 0   | 0 |
| 331 | 154 | 3392 | 08/05/1912 | 1 | 1 |        | 1          |            |            |            | 1 |      |   |   |     |   | 0   | 0 |
| 332 | 155 | 3341 | 09/09/1946 | 1 | 1 | 102,43 | 1          | 08/11/2002 | 25/02/2003 | 08/09/2011 | 1 | 6,59 | 7 | 7 | 1   | 1 | 0   | 6 |
| 333 | 156 | 3341 | 09/09/1946 | 1 | 2 | 102,43 | 1          | 08/11/2002 | 25/02/2003 | 08/09/2011 | 1 | 6,59 | 7 | 7 | 1   | 1 | 0   | 6 |
| 334 | 157 | 1175 | 31/03/1927 | 1 | x |        | 0          | 23/03/1994 |            |            | 0 | 7,4  | 5 |   |     |   | 1,0 | 5 |
| 335 | 158 | 1175 | 31/03/1927 | 1 | 1 |        | 0          | 23/03/1994 |            |            | 0 | 7,4  | 5 |   |     |   | 1,0 | 5 |
| 336 | 159 | 3522 | 01/07/1948 | 1 | 1 | 13,50  | 1          | 23/05/2003 | 22/01/2004 | 07/03/2005 | 1 | 3,4  | 9 | 9 | 1   | 1 | 1   | 6 |
| 337 | 160 | 3522 | 01/07/1948 | 1 | 1 | 13,50  | 1          | 23/05/2003 | 22/01/2004 | 07/03/2005 | 1 | 3,4  | 9 | 9 | 1   | 1 | 1   | 6 |
| 338 | 161 | 4248 | 05/12/1949 | 1 | x | 49,17  | 0          | 27/07/2005 | 03/02/2006 | 08/03/2010 | 0 | 7,8  | 7 |   | 0   | 0 | 0   | 4 |
| 339 | 162 | 4248 | 05/12/1949 | 1 | 1 | 49,17  | 0          | 27/07/2005 | 03/02/2006 | 08/03/2010 | 0 | 7,8  | 7 |   | 0   | 0 | 0   | 4 |
| 340 | 163 | 4122 | 19/05/1932 | 1 | 2 |        | 0          |            |            |            | 0 |      |   |   |     |   | 0   | 0 |
| 341 | 164 | 4122 | 19/05/1932 | 1 | 3 |        | 0          |            |            |            | 0 |      |   |   |     |   | 0   | 0 |
| 342 | 165 | 4077 | 08/09/1946 | 1 | 2 |        | 0          |            |            |            | 0 |      |   |   |     |   | 0   | 0 |
| 343 | 166 | 4077 | 08/09/1946 | 1 | 3 |        | 0          |            |            |            | 0 |      |   |   |     |   | 0   | 0 |
| 344 | 167 | 2776 | 11/07/1923 | 1 | 1 |        | 0          |            |            |            | 0 |      |   |   |     |   | 0   | 0 |
| 345 | 168 | 2776 | 11/07/1923 | 1 | x |        | 0          |            |            |            | 0 |      |   |   |     |   | 0   | 0 |
| 346 | 169 | 2774 | 10/10/1928 | 1 | 2 |        | 1          |            | 10/07/2001 |            | 1 | 8    |   |   |     |   | 0   | 5 |
| 347 | 170 | 2774 | 10/10/1928 | 1 | 2 |        | 1          |            | 10/07/2001 |            | 1 | 8    |   |   |     |   | 0   | 5 |
| 348 | 171 | 2487 | 15/07/1924 | 1 | 1 |        | 1          | 11/07/1994 |            |            | 1 | 20,2 | 5 |   |     |   | 0,0 | 2 |
| 349 | 172 | 2487 | 15/07/1924 | 1 | 3 |        | 1          | 11/07/1994 |            |            | 1 | 20,2 | 5 |   |     |   | 0,0 | 2 |
| 350 | 173 | 3844 | 02/02/1947 | 1 | 1 | 11,33  | 1          | 06/05/2004 | 05/01/2006 | 15/12/2006 | 1 | 7,4  | 7 | 8 | 0   | 1 | 1   | 6 |
| 351 | 174 | 3844 | 02/02/1947 | 1 | 2 | 11,33  | 1          | 06/05/2004 | 05/01/2006 | 15/12/2006 | 1 | 7,4  | 7 | 8 | 0   | 1 | 1   | 6 |
| 352 | 175 | 3340 | 25/04/1940 | 1 | 0 | 27,77  | 1          | 08/11/2002 | 26/08/2003 | 19/12/2005 | 1 | 6,71 | 7 | 8 | 1   | 0 | 0   | 5 |
| 353 | 176 | 3340 | 25/04/1940 | 1 | x | 27,77  | 1          | 08/11/2002 | 26/08/2003 | 19/12/2005 | 1 | 6,71 | 7 | 8 | 1   | 0 | 0   | 5 |
| 355 | 1   | 5666 | 12/05/1965 | 0 | 1 | 25,60  | 0          | 17/07/2009 | 04/11/2009 | 22/12/2011 | 0 | 5,4  | 6 | 7 | 1   | 0 | 0   | 5 |
| 356 | 2   | 5666 | 12/05/1965 | 1 | 2 | 25,60  | 0          | 17/07/2009 | 04/11/2009 | 22/12/2011 | 0 | 5,4  | 6 | 7 | 1   | 0 | 0   | 5 |
| 357 | 3   | 5666 | 12/05/1965 | 1 | 2 | 25,60  | 0          | 17/07/2009 | 04/11/2009 | 22/12/2011 | 0 | 5,4  | 6 | 7 | 1   | 0 | 0   | 5 |
| 358 | 4   | 5657 | 21/05/1952 | 0 | 0 | 48,47  | 0          | 18/06/2009 | 15/10/2009 | 29/10/2013 | 0 | 6,1  | 7 | 7 | 1   | 0 | 0   | 5 |
| 359 | 5   | 5657 | 21/05/1952 | 1 | 0 | 48,47  | 0          | 18/06/2009 | 15/10/2009 | 29/10/2013 | 0 | 6,1  | 7 | 7 | 1   | 0 | 0   | 5 |
| 360 | 6   | 5657 | 21/05/1952 | 1 | 2 | 48,47  | 0          | 18/06/2009 | 15/10/2009 | 29/10/2013 | 0 | 6,1  | 7 | 7 | 1   | 0 | 0   | 5 |
| 361 | 7   | 6922 | 08/11/1953 | 0 | 0 | 21,43  | 0          | 09/09/2011 | 18/10/2011 | 31/07/2013 | 0 | 27   | 9 | 8 | 0   | 0 | 0   | 2 |
| 362 | 8   | 6922 | 08/11/1953 | 1 | 1 | 21,43  | 0          | 09/09/2011 | 18/10/2011 | 31/07/2013 | 0 | 27   | 9 | 8 | 0   | 0 | 0   | 2 |
| 363 | 9   | 6922 | 08/11/1953 | 1 | 0 | 21,43  | 0          | 09/09/2011 | 18/10/2011 | 31/07/2013 | 0 | 27   | 9 | 8 | 0   | 0 | 0   | 2 |
| 364 | 10  | 5567 | 09/03/1956 | 0 | 0 | 33,80  | 0          | 21/01/2009 | 08/04/2009 | 02/02/2012 | 0 | 8,9  | 7 | 7 | 0   | 0 | 0   | 4 |
| 365 | 11  | 5567 | 09/03/1956 | 1 | 1 | 33,80  | 0          | 21/01/2009 | 08/04/2009 | 02/02/2012 | 0 | 8,9  | 7 | 7 | 0   | 0 | 0   | 4 |
| 366 | 12  | 5567 | 09/03/1956 | 0 | 1 | 33,80  | 0          | 21/01/2009 | 08/04/2009 | 02/02/2012 | 0 | 8,9  | 7 | 7 | 0   | 0 | 0   | 4 |
| 367 | 13  | 5564 | 15/03/1942 | 1 | 0 | 65,60  | 0          | 23/10/2008 | 10/03/2009 | 28/08/2014 | 0 | 5,9  | 6 | 6 | 0   | 0 | 0   | 4 |
| 368 | 14  | 5564 | 15/03/1942 | 1 | 2 | 65,60  | 0          | 23/10/2008 | 10/03/2009 | 28/08/2014 | 0 | 5,9  | 6 | 6 | 0   | 0 | 0   | 4 |
| 369 | 15  | 5564 | 15/03/1942 | 1 | 2 | 65,60  | 0          | 23/10/2008 | 10/03/2009 | 28/08/2014 | 0 | 5,9  | 6 | 6 | 0   | 0 | 0   | 4 |
| 370 | 16  | 5669 | 25/08/1951 | 1 | 2 | 59,93  | 0          | 30/04/2009 | 05/11/2009 | 03/11/2014 | 0 | 5,7  | 7 | 7 | 0   | 0 | 0   | 4 |
| 371 | 17  | 5669 | 25/08/1951 | 1 | 1 | 59,93  | 0          | 30/04/2009 | 05/11/2009 | 03/11/2014 | 0 | 5,7  | 7 | 7 | 0   | 0 | 0   | 4 |
| 372 | 18  | 5669 | 25/08/1951 | 1 | 2 | 59,93  | 0          | 30/04/2009 | 05/11/2009 | 03/11/2014 | 0 | 5,7  | 7 | 7 | 0   | 0 | 0   | 4 |
| 373 | 19  | 6823 | 12/12/1932 | 1 | 2 | 13,13  | 1          | 29/03/2011 | 06/09/2011 | 10/10/2012 | 1 | 8    | 9 | 1 | 1   | 1 | 0   | 6 |
| 374 | 20  | 6823 | 12/12/1932 | 1 | 0 | 13,13  | 1          | 29/03/2011 | 06/09/2011 | 10/10/2012 | 1 | 8    | 9 | 1 | 1   | 1 | 0   | 6 |



|     |    |      |            |   |   |       |   |            |            |            |   |       |   |   |   |   |   |     |   |   |   |
|-----|----|------|------------|---|---|-------|---|------------|------------|------------|---|-------|---|---|---|---|---|-----|---|---|---|
| 375 | 21 | 6823 | 12/12/1932 | 0 | 1 | 13.13 | 1 | 29/03/2011 | 06/09/2011 | 10/10/2012 | 1 | 8     | 9 |   | 1 | 1 | 1 | 0.2 | 2 | 0 | 6 |
| 376 | 22 | 6850 | 06/03/1966 | 1 | 1 | 32.23 | 0 | 17/06/2011 | 03/10/2011 | 10/06/2014 | 0 | 4.13  | 6 | 7 | 0 | 0 | 0 | 0.1 | 0 | 0 | 4 |
| 377 | 23 | 6850 | 06/03/1966 | 1 | 2 | 32.23 | 0 | 17/06/2011 | 03/10/2011 | 10/06/2014 | 0 | 4.13  | 6 | 7 | 0 | 0 | 0 | 0.1 | 0 | 0 | 4 |
| 378 | 24 | 6850 | 06/03/1966 | 1 | 2 | 32.23 | 0 | 17/06/2011 | 03/10/2011 | 10/06/2014 | 0 | 4.13  | 6 | 7 | 0 | 0 | 0 | 0.1 | 0 | 0 | 4 |
| 379 | 25 | 6808 | 29/08/1962 | 1 | 1 | 40.77 | 0 | 04/07/2011 | 22/08/2011 | 15/01/2015 | 0 | 26    | 8 | 7 | 1 | 0 | 1 | 0.2 | 0 | 0 | 5 |
| 380 | 26 | 6808 | 29/08/1962 | 1 | 3 | 40.77 | 0 | 04/07/2011 | 22/08/2011 | 15/01/2015 | 0 | 26    | 8 | 7 | 1 | 0 | 1 | 0.2 | 0 | 0 | 5 |
| 381 | 27 | 6808 | 29/08/1962 | 1 | 1 | 40.77 | 0 | 04/07/2011 | 22/08/2011 | 15/01/2015 | 0 | 26    | 8 | 7 | 1 | 0 | 1 | 0.2 | 0 | 0 | 5 |
| 382 | 28 | 5638 | 04/05/1944 | 0 | 0 | 24.70 | 0 | 20/05/2009 | 13/10/2011 | 04/11/2013 | 0 | 4.3   | 6 |   | 0 | 0 | 0 | 0.1 | 0 | 0 | 2 |
| 383 | 29 | 5638 | 04/05/1944 | 1 | 0 | 24.70 | 0 | 20/05/2009 | 13/10/2011 | 04/11/2013 | 0 | 4.3   | 6 |   | 0 | 0 | 0 | 0.1 | 0 | 0 | 2 |
| 384 | 30 | 5638 | 04/05/1944 | 1 | 0 | 24.70 | 0 | 20/05/2009 | 13/10/2011 | 04/11/2013 | 0 | 4.3   | 6 |   | 0 | 0 | 0 | 0.1 | 0 | 0 | 2 |
| 385 | 31 | 5674 | 23/04/1949 | 0 | 2 | 25.77 | 0 | 24/06/2009 | 10/11/2009 | 03/01/2012 | 0 | 5.2   | 6 | 6 | 0 | 0 | 0 | 0.6 | 0 | 0 | 4 |
| 386 | 32 | 5674 | 23/04/1949 | 0 | 1 | 25.77 | 0 | 24/06/2009 | 10/11/2009 | 03/01/2012 | 0 | 5.2   | 6 | 6 | 0 | 0 | 0 | 0.6 | 0 | 0 | 4 |
| 387 | 33 | 5674 | 23/04/1949 | 1 | 2 | 25.77 | 0 | 24/06/2009 | 10/11/2009 | 03/01/2012 | 0 | 5.2   | 6 | 6 | 0 | 0 | 0 | 0.6 | 0 | 0 | 4 |
| 388 | 34 | 5660 | 23/11/1948 | 1 | 0 | 9.50  | 0 | 22/07/2009 | 27/10/2009 | 12/08/2010 | 0 | 5.8   | 7 | 9 | 0 | 0 | 1 | 0.1 | 0 | 0 | 4 |
| 389 | 35 | 5660 | 23/11/1948 | 1 | 0 | 9.50  | 0 | 22/07/2009 | 27/10/2009 | 12/08/2010 | 0 | 5.8   | 7 | 9 | 0 | 0 | 1 | 0.1 | 0 | 0 | 4 |
| 390 | 36 | 5660 | 23/11/1948 | 1 | 0 | 9.50  | 0 | 22/07/2009 | 27/10/2009 | 12/08/2010 | 0 | 5.8   | 7 | 9 | 0 | 0 | 1 | 0.1 | 0 | 0 | 4 |
| 391 | 37 | 5636 | 27/02/1957 | 0 | 1 | 0.43  | 0 | 17/04/2009 | 17/09/2009 | 30/09/2009 | 0 | 5.5   | 7 | 7 | 1 | 0 | 1 | 0.4 | 0 | 0 | 5 |
| 392 | 38 | 5636 | 27/02/1957 | 1 | 2 | 0.43  | 0 | 17/04/2009 | 17/09/2009 | 30/09/2009 | 0 | 5.5   | 7 | 7 | 1 | 0 | 1 | 0.4 | 0 | 0 | 5 |
| 393 | 39 | 5636 | 27/02/1957 | 1 | 1 | 0.43  | 0 | 17/04/2009 | 17/09/2009 | 30/09/2009 | 0 | 5.5   | 7 | 7 | 1 | 0 | 1 | 0.4 | 0 | 0 | 5 |
| 394 | 40 | 6771 | 30/04/1956 | 0 | 0 | 24.00 | 0 | 05/05/2011 | 02/08/2011 | 02/08/2013 | 0 | 2.2   | 6 | 7 | 0 | 0 | 0 | 0.1 | 0 | 0 | 4 |
| 395 | 41 | 6771 | 30/04/1956 | 0 | 1 | 24.00 | 0 | 05/05/2011 | 02/08/2011 | 02/08/2013 | 0 | 2.2   | 6 | 7 | 0 | 0 | 0 | 0.1 | 0 | 0 | 4 |
| 396 | 42 | 6771 | 30/04/1956 | 0 | 1 | 24.00 | 0 | 05/05/2011 | 02/08/2011 | 02/08/2013 | 0 | 2.2   | 6 | 7 | 0 | 0 | 0 | 0.1 | 0 | 0 | 4 |
| 397 | 43 | 6836 | 25/09/1941 | 0 | 2 | 11.90 | 0 | 23/06/2011 | 19/10/2011 | 16/10/2012 | 0 | 5.5   | 8 | 7 | 0 | 0 | 0 | 0.1 | 0 | 0 | 4 |
| 398 | 44 | 6836 | 25/09/1941 | 0 | 1 | 11.90 | 0 | 23/06/2011 | 19/10/2011 | 16/10/2012 | 0 | 5.5   | 8 | 7 | 0 | 0 | 0 | 0.1 | 0 | 0 | 4 |
| 399 | 45 | 6836 | 25/09/1941 | 0 | 1 | 11.90 | 0 | 23/06/2011 | 19/10/2011 | 16/10/2012 | 0 | 5.5   | 8 | 7 | 0 | 0 | 0 | 0.1 | 0 | 0 | 4 |
| 400 | 46 | 6810 | 17/08/1948 | 0 | 0 | 38.33 | 0 | 13/07/2011 | 24/08/2011 | 04/11/2014 | 0 | 6.9   | 8 | 7 | 0 | 1 | 0 | 0.1 | 0 | 0 | 6 |
| 401 | 47 | 6810 | 17/08/1948 | 1 | 1 | 38.33 | 0 | 13/07/2011 | 24/08/2011 | 04/11/2014 | 0 | 6.9   | 8 | 7 | 0 | 1 | 0 | 0.1 | 0 | 0 | 6 |
| 402 | 48 | 6810 | 17/08/1948 | 1 | 2 | 38.33 | 0 | 13/07/2011 | 24/08/2011 | 04/11/2014 | 0 | 6.9   | 8 | 7 | 0 | 1 | 0 | 0.1 | 0 | 0 | 6 |
| 403 | 49 | 7025 | 09/01/1953 | 0 | 1 | 38.03 | 0 | 22/09/2011 | 15/12/2011 | 16/02/2015 | 0 | 5.7   | 8 | 7 | 1 | 0 | 1 | 0.4 | 0 | 0 | 5 |
| 404 | 50 | 7025 | 09/01/1953 | 1 | 3 | 38.03 | 0 | 22/09/2011 | 15/12/2011 | 16/02/2015 | 0 | 5.7   | 8 | 7 | 1 | 0 | 1 | 0.4 | 0 | 0 | 5 |
| 405 | 51 | 7025 | 09/01/1953 | 1 | 3 | 38.03 | 0 | 22/09/2011 | 15/12/2011 | 16/02/2015 | 0 | 5.7   | 8 | 7 | 1 | 0 | 1 | 0.4 | 0 | 0 | 5 |
| 406 | 52 | 6891 | 20/03/1949 | 0 | 2 | 1.03  | 0 | 11/07/2011 | 02/09/2011 | 03/10/2011 | 0 | 5.4   | 8 | 7 | 1 | 1 | 0 | 0.6 | 0 | 0 | 5 |
| 407 | 53 | 6891 | 20/03/1949 | 1 | 2 | 1.03  | 0 | 11/07/2011 | 02/09/2011 | 03/10/2011 | 0 | 5.4   | 8 | 7 | 1 | 1 | 0 | 0.6 | 0 | 0 | 5 |
| 408 | 54 | 6891 | 20/03/1949 | 1 | 1 | 1.03  | 0 | 11/07/2011 | 02/09/2011 | 03/10/2011 | 0 | 5.4   | 8 | 7 | 1 | 1 | 0 | 0.6 | 0 | 0 | 5 |
| 409 | 55 | 5562 | 01/01/1949 | 0 | 0 | 69.33 | 0 | 30/10/2007 | 10/02/2009 | 20/11/2014 | 0 | 0.53  | 7 | 7 | 0 | 0 | 1 | 0.5 | 0 | 0 | 4 |
| 410 | 56 | 5562 | 01/01/1949 | 1 | 2 | 69.33 | 0 | 30/10/2007 | 10/02/2009 | 20/11/2014 | 0 | 0.53  | 7 | 7 | 0 | 0 | 1 | 0.5 | 0 | 0 | 4 |
| 411 | 57 | 5562 | 01/01/1949 | 1 | 1 | 69.33 | 0 | 30/10/2007 | 10/02/2009 | 20/11/2014 | 0 | 0.53  | 7 | 7 | 0 | 0 | 1 | 0.5 | 0 | 0 | 4 |
| 412 | 58 | 6983 | 19/03/1943 | 0 | 0 | 4.57  | 0 | 20/07/2011 | 28/10/2011 | 15/03/2012 | 0 | 7.75  | 7 | 7 | 1 | 1 | 0 | 0.3 | 0 | 0 | 5 |
| 413 | 59 | 6983 | 19/03/1943 | 1 | 2 | 4.57  | 0 | 20/07/2011 | 28/10/2011 | 15/03/2012 | 0 | 7.75  | 7 | 7 | 1 | 1 | 0 | 0.3 | 0 | 0 | 5 |
| 414 | 60 | 6983 | 19/03/1943 | 1 | 2 | 4.57  | 0 | 20/07/2011 | 28/10/2011 | 15/03/2012 | 0 | 7.75  | 7 | 7 | 1 | 1 | 0 | 0.3 | 0 | 0 | 5 |
| 415 | 61 | 8851 | 25/05/1955 | 1 | 3 | 41.90 | 1 | 14/07/2011 | 24/10/2011 | 21/04/2015 | 1 | 7.9   | 9 | 9 | 1 | 0 | 0 | 1.0 | 0 | 0 | 5 |
| 416 | 62 | 8851 | 25/05/1955 | 1 | 2 | 41.90 | 1 | 14/07/2011 | 24/10/2011 | 21/04/2015 | 1 | 7.9   | 9 | 9 | 1 | 0 | 0 | 1.0 | 0 | 0 | 5 |
| 417 | 63 | 8851 | 25/05/1955 | 1 | 2 | 41.90 | 1 | 14/07/2011 | 24/10/2011 | 21/04/2015 | 1 | 7.9   | 9 | 9 | 1 | 0 | 0 | 1.0 | 0 | 0 | 5 |
| 418 | 64 | 6655 | 23/07/1939 | 0 | 1 | 22.27 | 0 | 16/03/2011 | 30/08/2011 | 08/07/2013 | 0 | 19    | 7 | 7 | 1 | 0 | 0 | 0.6 | 0 | 0 | 5 |
| 419 | 65 | 6655 | 23/07/1939 | 1 | 2 | 22.27 | 0 | 16/03/2011 | 30/08/2011 | 08/07/2013 | 0 | 19    | 7 | 7 | 1 | 0 | 0 | 0.6 | 0 | 0 | 5 |
| 420 | 66 | 6655 | 23/07/1939 | 1 | 2 | 22.27 | 0 | 16/03/2011 | 30/08/2011 | 08/07/2013 | 0 | 19    | 7 | 7 | 1 | 0 | 0 | 0.6 | 0 | 0 | 5 |
| 421 | 67 | 7061 | 14/03/1944 | 0 | 1 | 37.60 | 1 | 20/10/2011 | 14/12/2011 | 02/02/2015 | 1 | 7.1   | 9 | 9 | 1 | 1 | 1 | 0.4 | 0 | 0 | 5 |
| 422 | 68 | 7061 | 14/03/1944 | 1 | x | 37.60 | 1 | 20/10/2011 | 14/12/2011 | 02/02/2015 | 1 | 7.1   | 9 | 9 | 1 | 1 | 1 | 0.4 | 0 | 0 | 5 |
| 423 | 69 | 7061 | 14/03/1944 | 1 | x | 37.60 | 1 | 20/10/2011 | 14/12/2011 | 02/02/2015 | 1 | 7.1   | 9 | 9 | 1 | 1 | 1 | 0.4 | 0 | 0 | 5 |
| 424 | 70 | 6863 | 27/05/1946 | 0 | 0 | 3.90  | 0 | 10/05/2011 | 29/09/2011 | 26/01/2012 | 0 | 8.8   | 8 | 6 | 0 | 0 | 0 | 0.1 | 0 | 0 | 4 |
| 425 | 71 | 6863 | 27/05/1946 | 0 | 0 | 3.90  | 0 | 10/05/2011 | 29/09/2011 | 26/01/2012 | 0 | 8.8   | 8 | 6 | 0 | 0 | 0 | 0.1 | 0 | 0 | 4 |
| 426 | 72 | 6863 | 27/05/1946 | 0 | 1 | 3.90  | 0 | 10/05/2011 | 29/09/2011 | 26/01/2012 | 0 | 8.8   | 8 | 6 | 0 | 0 | 0 | 0.1 | 0 | 0 | 4 |
| 427 | 73 | 6920 | 18/12/1948 | 1 | 1 | 23.27 | 1 | 14/04/2011 | 18/10/2011 | 26/09/2013 | 1 | 162   | 8 | 1 | 1 | 1 | 1 | 0.3 | 1 | 0 | 6 |
| 428 | 74 | 6920 | 18/12/1948 | 1 | 1 | 23.27 | 1 | 14/04/2011 | 18/10/2011 | 26/09/2013 | 1 | 162   | 8 | 1 | 1 | 1 | 1 | 0.3 | 1 | 0 | 6 |
| 429 | 75 | 6942 | 15/09/1940 | 1 | 1 | 2.67  | 1 | 10/01/2011 | 27/10/2011 | 17/01/2012 | 1 | 10.79 | 8 | 1 | 1 | 1 | 1 | 0.1 | 1 | 1 | 6 |
| 430 | 76 | 6942 | 15/09/1940 | 1 | 1 | 2.67  | 1 | 10/01/2011 | 27/10/2011 | 17/01/2012 | 1 | 10.79 | 8 | 1 | 1 | 1 | 1 | 0.1 | 1 | 1 | 6 |
| 431 | 77 | 6822 | 19/10/1939 | 1 | 2 | 34.70 | 0 | 06/05/2011 | 08/09/2011 | 29/07/2014 | 0 | 8.2   | 7 | 7 | 0 | 0 | 0 | 0.4 | 1 | 0 | 4 |
| 432 | 78 | 6822 | 19/10/1939 | 1 | 3 | 34.70 | 0 | 06/05/2011 | 08/09/2011 | 29/07/2014 | 0 | 8.2   | 7 | 7 | 0 | 0 | 0 | 0.4 | 1 | 0 | 4 |
| 433 | 79 | 6655 | 23/07/1939 | 1 | 1 | 22.27 | 0 | 16/03/2011 | 30/08/2011 | 08/07/2013 | 0 | 19    | 7 | 7 | 1 | 0 | 0 | 0.6 | 0 | 0 | 5 |



|     |     |      |            |   |   |        |   |            |            |            |   |       |   |   |   |   |     |     |   |   |   |
|-----|-----|------|------------|---|---|--------|---|------------|------------|------------|---|-------|---|---|---|---|-----|-----|---|---|---|
| 506 | 152 | 2776 | 11/07/1923 | 1 | x |        | 0 |            |            |            | 0 |       |   |   |   |   |     | 0   | 0 |   |   |
| 507 | 153 | 5142 | 07/10/1930 | 1 | 3 | 196.57 | 1 | 01/08/1994 | 02/03/1995 | 19/07/2011 | 1 | 7     |   | 0 | 0 | 0 |     | 1   | 1 | 1 |   |
| 508 | 154 | 5142 | 07/10/1930 | 1 | 2 | 196.57 | 1 | 01/08/1994 | 02/03/1995 | 19/07/2011 | 1 | 7     |   | 0 | 0 | 0 |     | 1   | 1 | 1 |   |
| 509 | 155 | 5274 | 24/02/1913 | 1 | 1 |        | 0 | 17/10/2002 |            | 02/02/2015 | 0 | 47.4  | 6 |   |   |   | 1.0 | 1   | 0 |   |   |
| 510 | 156 | 5274 | 24/02/1913 | 1 | x |        | 0 | 17/10/2002 |            | 02/02/2015 | 0 | 47.4  | 6 |   |   |   | 1.0 | 1   | 0 |   |   |
| 511 | 157 | 4153 | 17/11/1930 | 1 | 1 | 11.03  | 1 | 01/04/2005 | 22/12/2008 | 23/11/2009 | 1 | 9     | 9 | 1 | 1 | 1 | 1.0 | 0   | 2 | 7 |   |
| 512 | 158 | 4153 | 17/11/1930 | 1 | 1 | 11.03  | 1 | 01/04/2005 | 22/12/2008 | 23/11/2009 | 1 | 9     | 9 | 1 | 1 | 1 | 1.0 | 0   | 2 | 7 |   |
| 513 | 159 | 6342 | 11/06/1966 | 1 | 3 |        | 1 |            |            |            | 1 |       |   |   |   |   |     | 0   | 0 |   |   |
| 514 | 160 | 6342 | 11/06/1966 | 1 | 3 |        | 1 |            |            |            | 1 |       |   |   |   |   |     | 0   | 0 |   |   |
| 515 | 161 | 5421 | 10/10/1941 | 1 | 1 | 53.90  | 1 | 23/01/2009 | 31/03/2009 | 27/09/2013 | 1 | 5.48  | 9 | 9 | 1 | 1 | 0.9 | 0   | 0 | 5 |   |
| 516 | 162 | 5421 | 10/10/1941 | 1 | 1 | 53.90  | 1 | 23/01/2009 | 31/03/2009 | 27/09/2013 | 1 | 5.48  | 9 | 9 | 1 | 1 | 0.9 | 0   | 0 | 5 |   |
| 517 | 163 | 3688 | 26/07/1940 | 1 | 2 | 3.90   | 1 | 10/11/2003 | 21/04/2009 | 18/08/2009 | 1 | 14.6  | 8 |   |   |   | 0.1 | 1   | 0 | 4 |   |
| 518 | 164 | 3688 | 26/07/1940 | 1 | 1 | 3.90   | 1 | 10/11/2003 | 21/04/2009 | 18/08/2009 | 1 | 14.6  | 8 |   |   |   | 0.1 | 1   | 0 | 4 |   |
| 519 | 165 | 5772 | 04/09/1940 | 1 | x | 22.20  | 1 | 01/12/2008 | 19/05/2009 | 25/03/2011 | 1 | 14    | 7 | 7 | 1 | 0 | 0.3 | 0   | 0 | 5 |   |
| 520 | 166 | 5772 | 04/09/1940 | 1 | x | 22.20  | 1 | 01/12/2008 | 19/05/2009 | 25/03/2011 | 1 | 14    | 7 | 7 | 1 | 0 | 0.3 | 0   | 0 | 5 |   |
| 521 | 167 | 6194 | 06/06/1920 | 1 | 1 |        | 1 | 02/03/2010 |            | 25/10/2011 | 1 | 78    | 9 |   |   |   | 2   | 0   | 3 |   |   |
| 522 | 168 | 6194 | 06/06/1920 | 1 | 1 |        | 1 | 02/03/2010 |            | 25/10/2011 | 1 | 78    | 9 |   |   |   | 2   | 0   | 3 |   |   |
| 523 | 169 | 5359 | 15/09/1936 | 1 | 2 | 14.30  | 1 | 16/02/2005 | 29/11/2010 | 08/02/2012 | 1 | 5.2   | 6 | 9 | 1 | 0 | 0.1 | 0   | 0 | 5 |   |
| 524 | 170 | 5359 | 15/09/1936 | 1 | 2 | 14.30  | 1 | 16/02/2005 | 29/11/2010 | 08/02/2012 | 1 | 5.2   | 6 | 9 | 1 | 0 | 0.1 | 0   | 0 | 5 |   |
| 525 | 171 | 6834 | 06/09/1946 | 1 | 2 | 19.30  | 0 | 17/12/2010 | 14/02/2012 | 23/09/2013 | 0 | 8     |   |   |   |   | 1   | 0   | 2 |   |   |
| 526 | 172 | 6834 | 06/09/1946 | 1 | 0 | 19.30  | 0 | 17/12/2010 | 14/02/2012 | 23/09/2013 | 0 | 8     |   |   |   |   | 1   | 0   | 2 |   |   |
| 527 | 173 | 6627 | 22/06/1947 | 1 | x | 41.90  | 1 | 23/08/2000 | 01/01/2001 | 28/06/2004 | 1 | 7.8   | 9 |   |   |   | 0.4 | 1   | 2 | 3 |   |
| 528 | 174 | 6627 | 22/06/1947 | 1 | 0 | 41.90  | 1 | 23/08/2000 | 01/01/2001 | 28/06/2004 | 1 | 7.8   | 9 |   |   |   | 0.4 | 1   | 2 | 3 |   |
| 529 | 175 | 6843 | 31/07/1927 | 1 | 3 |        | 1 | 15/05/2011 |            | 08/09/2011 | 1 | 10    |   |   |   |   | 1   | 0   | 1 |   |   |
| 530 | 176 | 6843 | 31/07/1927 | 1 | 3 |        | 1 | 15/05/2011 |            | 08/09/2011 | 1 | 10    |   |   |   |   | 1   | 0   | 1 |   |   |
| 532 | 1   | 5703 | 18/11/1946 | 0 | 1 | 1.30   | 0 | 21/05/2009 | 10/12/2009 | 19/01/2010 | 0 | 11.44 | 6 | 7 | 1 | 0 | 1   | 0.1 | 0 | 0 | 5 |
| 533 | 2   | 5703 | 18/11/1946 | 1 | 2 | 1.30   | 0 | 21/05/2009 | 10/12/2009 | 19/01/2010 | 0 | 11.44 | 6 | 7 | 1 | 0 | 1   | 0.1 | 0 | 0 | 5 |
| 534 | 3   | 5703 | 18/11/1946 | 1 | 1 | 1.30   | 0 | 21/05/2009 | 10/12/2009 | 19/01/2010 | 0 | 11.44 | 6 | 7 | 1 | 0 | 1   | 0.1 | 0 | 0 | 5 |
| 535 | 4   | 6876 | 09/10/1947 | 0 | 2 | 35.77  | 0 | 28/03/2011 | 29/09/2011 | 22/09/2014 | 0 | 7     | 7 | 0 | 0 | 0 | 0.6 | 0   | 0 | 4 |   |
| 536 | 5   | 6876 | 09/10/1947 | 1 | 0 | 35.77  | 0 | 28/03/2011 | 29/09/2011 | 22/09/2014 | 0 | 7     | 7 | 0 | 0 | 0 | 0.6 | 0   | 0 | 4 |   |
| 537 | 6   | 6876 | 09/10/1947 | 1 | 0 | 35.77  | 0 | 28/03/2011 | 29/09/2011 | 22/09/2014 | 0 | 7     | 7 | 0 | 0 | 0 | 0.6 | 0   | 0 | 4 |   |
| 538 | 7   | 6905 | 27/02/1954 | 0 | 1 | 12.53  | 0 | 15/06/2011 | 13/10/2011 | 29/10/2012 | 0 | 3.7   | 7 | 7 | 0 | 0 | 0.4 | 0   | 0 | 4 |   |
| 539 | 8   | 6905 | 27/02/1954 | 1 | 0 | 12.53  | 0 | 15/06/2011 | 13/10/2011 | 29/10/2012 | 0 | 3.7   | 7 | 7 | 0 | 0 | 0.4 | 0   | 0 | 4 |   |
| 540 | 9   | 6905 | 27/02/1954 | 1 | 1 | 12.53  | 0 | 15/06/2011 | 13/10/2011 | 29/10/2012 | 0 | 3.7   | 7 | 7 | 0 | 0 | 0.4 | 0   | 0 | 4 |   |
| 541 | 10  | 6878 | 12/03/1941 | 0 | 2 | 10.03  | 1 | 07/06/2011 | 30/09/2011 | 01/08/2012 | 1 | 5.6   | 7 | 6 | 0 | 0 | 0.1 | 0   | 0 | 4 |   |
| 542 | 11  | 6878 | 12/03/1941 | 1 | 2 | 10.03  | 1 | 07/06/2011 | 30/09/2011 | 01/08/2012 | 1 | 5.6   | 7 | 6 | 0 | 0 | 0.1 | 0   | 0 | 4 |   |
| 543 | 12  | 6878 | 12/03/1941 | 1 | 2 | 10.03  | 1 | 07/06/2011 | 30/09/2011 | 01/08/2012 | 1 | 5.6   | 7 | 6 | 0 | 0 | 0.1 | 0   | 0 | 4 |   |
| 544 | 13  | 6784 | 22/12/1963 | 0 | 0 | 8.03   | 0 | 01/02/2011 | 09/08/2011 | 10/04/2012 | 0 | 4.5   | 6 | 6 | 0 | 0 | 0.3 | 0   | 0 | 4 |   |
| 545 | 14  | 6784 | 22/12/1963 | 1 | 2 | 8.03   | 0 | 01/02/2011 | 09/08/2011 | 10/04/2012 | 0 | 4.5   | 6 | 6 | 0 | 0 | 0.3 | 0   | 0 | 4 |   |
| 546 | 15  | 6784 | 22/12/1963 | 1 | 2 | 8.03   | 0 | 01/02/2011 | 09/08/2011 | 10/04/2012 | 0 | 4.5   | 6 | 6 | 0 | 0 | 0.3 | 0   | 0 | 4 |   |
| 547 | 16  | 6858 | 29/04/1950 | 0 | 1 | 13.23  | 0 | 31/05/2011 | 22/09/2011 | 29/10/2012 | 0 | 4.65  | 7 | 6 | 0 | 0 | 0.2 | 0   | 0 | 4 |   |
| 548 | 17  | 6858 | 29/04/1950 | 0 | x | 13.23  | 0 | 31/05/2011 | 22/09/2011 | 29/10/2012 | 0 | 4.65  | 7 | 6 | 0 | 0 | 0.2 | 0   | 0 | 4 |   |
| 549 | 18  | 6858 | 29/04/1950 | 0 | 1 | 13.23  | 0 | 31/05/2011 | 22/09/2011 | 29/10/2012 | 0 | 4.65  | 7 | 6 | 0 | 0 | 0.2 | 0   | 0 | 4 |   |
| 550 | 19  | 5693 | 13/02/1950 | 0 | 0 | 58.40  | 0 | 07/02/2009 | 26/11/2009 | 08/10/2014 | 0 | 9.27  | 7 | 7 | 1 | 1 | 0.2 | 0   | 0 | 5 |   |
| 551 | 20  | 5693 | 13/02/1950 | 1 | 3 | 58.40  | 0 | 07/02/2009 | 26/11/2009 | 08/10/2014 | 0 | 9.27  | 7 | 7 | 1 | 1 | 0.2 | 0   | 0 | 5 |   |
| 552 | 21  | 5693 | 13/02/1950 | 1 | 1 | 58.40  | 0 | 07/02/2009 | 26/11/2009 | 08/10/2014 | 0 | 9.27  | 7 | 7 | 1 | 1 | 0.2 | 0   | 0 | 5 |   |
| 553 | 22  | 6879 | 18/07/1945 | 1 | 2 | 20.67  | 0 | 12/07/2011 | 30/09/2011 | 20/06/2013 | 0 | 7.31  | 7 | 7 | 0 | 0 | 1.0 | 0   | 0 | 4 |   |
| 554 | 23  | 6879 | 18/07/1945 | 1 | 1 | 20.67  | 0 | 12/07/2011 | 30/09/2011 | 20/06/2013 | 0 | 7.31  | 7 | 7 | 0 | 0 | 1.0 | 0   | 0 | 4 |   |
| 555 | 24  | 6879 | 18/07/1945 | 1 | 2 | 20.67  | 0 | 12/07/2011 | 30/09/2011 | 20/06/2013 | 0 | 7.31  | 7 | 7 | 0 | 0 | 1.0 | 0   | 0 | 4 |   |
| 556 | 25  | 6825 | 16/10/1956 | 0 | 0 | 37.40  | 0 | 02/08/2011 | 08/09/2011 | 20/10/2014 | 0 | 6.3   | 7 | 7 | 0 | 0 | 0.3 | 0   | 0 | 4 |   |
| 557 | 26  | 6825 | 16/10/1956 | 0 | 1 | 37.40  | 0 | 02/08/2011 | 08/09/2011 | 20/10/2014 | 0 | 6.3   | 7 | 7 | 0 | 0 | 0.3 | 0   | 0 | 4 |   |
| 558 | 27  | 6825 | 16/10/1956 | 0 | 3 | 37.40  | 0 | 02/08/2011 | 08/09/2011 | 20/10/2014 | 0 | 6.3   | 7 | 7 | 0 | 0 | 0.3 | 0   | 0 | 4 |   |
| 559 | 28  | 6757 | 15/12/1953 | 0 | 2 | 36.67  | 0 | 20/04/2011 | 21/07/2011 | 11/08/2014 | 0 | 8     | 7 | 7 | 0 | 0 | 0.1 | 0   | 0 | 4 |   |
| 560 | 29  | 6757 | 15/12/1953 | 1 | 3 | 36.67  | 0 | 20/04/2011 | 21/07/2011 | 11/08/2014 | 0 | 8     | 7 | 7 | 0 | 0 | 0.1 | 0   | 0 | 4 |   |
| 561 | 30  | 6757 | 15/12/1953 | 1 | 3 | 36.67  | 0 | 20/04/2011 | 21/07/2011 | 11/08/2014 | 0 | 8     | 7 | 7 | 0 | 0 | 0.1 | 0   | 0 | 4 |   |
| 562 | 31  | 5680 | 25/02/1948 | 0 | 2 | 7.67   | 0 | 01/09/2009 | 17/11/2009 | 07/07/2010 | 0 | 5.75  | 8 | 8 | 0 | 1 | 0.1 | 0   | 0 | 4 |   |
| 563 | 32  | 5680 | 25/02/1948 | 1 | 3 | 7.67   | 0 | 01/09/2009 | 17/11/2009 | 07/07/2010 | 0 | 5.75  | 8 | 8 | 0 | 1 | 0.1 | 0   | 0 | 4 |   |
| 564 | 33  | 5680 | 25/02/1948 | 1 | 2 | 7.67   | 0 | 01/09/2009 | 17/11/2009 | 07/07/2010 | 0 | 5.75  | 8 | 8 | 0 | 1 | 0.1 | 0   | 0 | 4 |   |
| 565 | 34  | 5681 | 18/02/1946 | 0 | 0 | 39.50  | 0 | 10/03/2009 | 19/11/2009 | 04/03/2013 | 0 | 3     | 6 | 7 | 0 | 0 | 0.1 | 0   | 0 | 4 |   |
| 566 | 35  | 5681 | 18/02/1946 | 0 | 0 | 39.50  | 0 | 10/03/2009 | 19/11/2009 | 04/03/2013 | 0 | 3     | 6 | 7 | 0 | 0 | 0.1 | 0   | 0 | 4 |   |
| 567 | 36  | 5681 | 18/02/1946 | 1 | 2 | 39.50  | 0 | 10/03/2009 | 19/11/2009 | 04/03/2013 | 0 | 3     | 6 | 7 | 0 | 0 | 0.1 | 0   | 0 | 4 |   |
| 568 | 37  | 6982 | 29/09/1953 | 0 | 0 |        | 0 | 06/07/2011 | 28/10/2011 | 28/10/2011 | 0 | 7.5   | 6 | 7 | 1 | 0 | 1   | 0.6 | 0 | 0 | 5 |
| 569 | 38  | 6982 | 29/09/1953 | 1 | 0 |        | 0 | 06/07/2011 | 28/10/2011 | 28/10/2011 | 0 | 7.5   | 6 | 7 | 1 | 0 | 1   | 0.6 | 0 | 0 | 5 |

|     |    |      |            |   |   |       |            |            |            |            |     |       |   |   |   |     |     |   |   |   |
|-----|----|------|------------|---|---|-------|------------|------------|------------|------------|-----|-------|---|---|---|-----|-----|---|---|---|
| 570 | 39 | 6982 | 29/09/1953 | 1 | 0 | 0     | 06/07/2011 | 28/10/2011 | 28/10/2011 | 0          | 7,5 | 6     | 7 | 1 | 0 | 1   | 0,6 | 0 | 0 | 5 |
| 571 | 40 | 6874 | 01/10/1943 | 0 | 2 | 36,37 | 0          | 11/08/2011 | 27/09/2011 | 08/10/2014 | 0   | 3,2   | 7 | 7 | 0 | 0   | 0,6 | 0 | 0 | 4 |
| 572 | 41 | 6874 | 01/10/1943 | 1 | 0 | 36,37 | 0          | 11/08/2011 | 27/09/2011 | 08/10/2014 | 0   | 3,2   | 7 | 7 | 0 | 0   | 0,6 | 0 | 0 | 4 |
| 573 | 42 | 6874 | 01/10/1943 | 1 | 0 | 36,37 | 0          | 11/08/2011 | 27/09/2011 | 08/10/2014 | 0   | 3,2   | 7 | 7 | 0 | 0   | 0,6 | 0 | 0 | 4 |
| 574 | 43 | 5309 | 02/05/1943 | 0 | 1 | 3,20  | 0          | 18/09/2007 | 22/01/2008 | 28/04/2008 | 0   | 6,06  | 6 | 6 | 0 | 0   | 0,5 | 0 | 0 | 4 |
| 575 | 44 | 5309 | 02/05/1943 | 1 | 1 | 3,20  | 0          | 18/09/2007 | 22/01/2008 | 28/04/2008 | 0   | 6,06  | 6 | 6 | 0 | 0   | 0,5 | 0 | 0 | 4 |
| 576 | 45 | 5309 | 02/05/1943 | 1 | 0 | 3,20  | 0          | 18/09/2007 | 22/01/2008 | 28/04/2008 | 0   | 6,06  | 6 | 6 | 0 | 0   | 0,5 | 0 | 0 | 4 |
| 577 | 46 | 6983 | 19/03/1943 | 0 | 0 | 4,57  | 0          | 20/07/2011 | 28/10/2011 | 15/03/2012 | 0   | 7,75  | 7 | 7 | 1 | 1   | 0,3 | 0 | 0 | 5 |
| 578 | 47 | 6983 | 19/03/1943 | 1 | 2 | 4,57  | 0          | 20/07/2011 | 28/10/2011 | 15/03/2012 | 0   | 7,75  | 7 | 7 | 1 | 1   | 0,3 | 0 | 0 | 5 |
| 579 | 48 | 6983 | 19/03/1943 | 1 | 3 | 4,57  | 0          | 20/07/2011 | 28/10/2011 | 15/03/2012 | 0   | 7,75  | 7 | 7 | 1 | 1   | 0,3 | 0 | 0 | 5 |
| 580 | 49 | 6958 | 08/04/1942 | 0 | 1 | 39,53 | 0          | 23/06/2011 | 29/09/2011 | 15/01/2015 | 0   | 5,97  | 7 | 7 | 0 | 0   | 0,3 | 0 | 0 | 4 |
| 581 | 50 | 6958 | 08/04/1942 | 0 | 1 | 39,53 | 0          | 23/06/2011 | 29/09/2011 | 15/01/2015 | 0   | 5,97  | 7 | 7 | 0 | 0   | 0,3 | 0 | 0 | 4 |
| 582 | 51 | 6958 | 08/04/1942 | 0 | 1 | 39,53 | 0          | 23/06/2011 | 29/09/2011 | 15/01/2015 | 0   | 5,97  | 7 | 7 | 0 | 0   | 0,3 | 0 | 0 | 4 |
| 583 | 52 | 6893 | 25/05/1951 | 0 | 0 | 25,63 | 0          | 02/06/2011 | 06/10/2011 | 25/11/2013 | 0   | 5,7   | 7 | 7 | 0 | 0   | 0,3 | 0 | 0 | 4 |
| 584 | 53 | 6893 | 25/05/1951 | 0 | 0 | 25,63 | 0          | 02/06/2011 | 06/10/2011 | 25/11/2013 | 0   | 5,7   | 7 | 7 | 0 | 0   | 0,3 | 0 | 0 | 4 |
| 585 | 54 | 6893 | 25/05/1951 | 1 | 2 | 25,63 | 0          | 02/06/2011 | 06/10/2011 | 25/11/2013 | 0   | 5,7   | 7 | 7 | 0 | 0   | 0,3 | 0 | 0 | 4 |
| 586 | 55 | 6774 | 07/11/1948 | 0 | 3 | 30,67 | 0          | 21/02/2011 | 04/08/2011 | 24/02/2014 | 0   | 9,8   | 7 | 7 | 0 | 0   | 0,3 | 0 | 0 | 4 |
| 587 | 56 | 6774 | 07/11/1948 | 1 | 3 | 30,67 | 0          | 21/02/2011 | 04/08/2011 | 24/02/2014 | 0   | 9,8   | 7 | 7 | 0 | 0   | 0,3 | 0 | 0 | 4 |
| 588 | 57 | 6774 | 07/11/1948 | 1 | 3 | 30,67 | 0          | 21/02/2011 | 04/08/2011 | 24/02/2014 | 0   | 9,8   | 7 | 7 | 0 | 0   | 0,3 | 0 | 0 | 4 |
| 589 | 58 | 5308 | 29/08/1940 | 0 | 0 | 75,60 | 0          | 10/04/2007 | 10/01/2008 | 28/04/2014 | 0   | 14    | 7 | 7 | 0 | 0   | 0,1 | 0 | 0 | 4 |
| 590 | 59 | 5308 | 29/08/1940 | 1 | 2 | 75,60 | 0          | 10/04/2007 | 10/01/2008 | 28/04/2014 | 0   | 14    | 7 | 7 | 0 | 0   | 0,1 | 0 | 0 | 4 |
| 591 | 60 | 5308 | 29/08/1940 | 1 | 2 | 75,60 | 0          | 10/04/2007 | 10/01/2008 | 28/04/2014 | 0   | 14    | 7 | 7 | 0 | 0   | 0,1 | 0 | 0 | 4 |
| 592 | 61 | 5689 | 29/05/1947 | 1 | 0 | 9,43  | 0          | 15/06/2009 | 24/11/2009 | 07/09/2010 | 0   | 7,47  | 7 | 7 | 0 | 0   | 0,1 | 0 | 0 | 4 |
| 593 | 62 | 5689 | 29/05/1947 | 1 | 3 | 9,43  | 0          | 15/06/2009 | 24/11/2009 | 07/09/2010 | 0   | 7,47  | 7 | 7 | 0 | 0   | 0,1 | 0 | 0 | 4 |
| 594 | 63 | 5689 | 29/05/1947 | 1 | 2 | 9,43  | 0          | 15/06/2009 | 24/11/2009 | 07/09/2010 | 0   | 7,47  | 7 | 7 | 0 | 0   | 0,1 | 0 | 0 | 4 |
| 595 | 64 | 6749 | 27/02/1953 | 0 | 1 | 24,50 | 0          | 30/03/2011 | 03/11/2011 | 18/11/2013 | 0   | 4,1   | 6 | 7 | 0 | 0   | 0,6 | 0 | 0 | 4 |
| 596 | 65 | 6749 | 27/02/1953 | 0 | 1 | 24,50 | 0          | 30/03/2011 | 03/11/2011 | 18/11/2013 | 0   | 4,1   | 6 | 7 | 0 | 0   | 0,6 | 0 | 0 | 4 |
| 597 | 66 | 6749 | 27/02/1953 | 0 | 1 | 24,50 | 0          | 30/03/2011 | 03/11/2011 | 18/11/2013 | 0   | 4,1   | 6 | 7 | 0 | 0   | 0,6 | 0 | 0 | 4 |
| 598 | 67 | 5683 | 27/08/1960 | 0 | 1 | 18,13 | 0          | 06/10/2009 | 10/11/2009 | 14/05/2011 | 0   | 6,8   | 7 | 7 | 0 | 0   | 0,5 | 0 | 0 | 4 |
| 599 | 68 | 5683 | 27/08/1960 | 1 | 3 | 18,13 | 0          | 06/10/2009 | 10/11/2009 | 14/05/2011 | 0   | 6,8   | 7 | 7 | 0 | 0   | 0,5 | 0 | 0 | 4 |
| 600 | 69 | 5683 | 27/08/1960 | 1 | 3 | 18,13 | 0          | 06/10/2009 | 10/11/2009 | 14/05/2011 | 0   | 6,8   | 7 | 7 | 0 | 0   | 0,5 | 0 | 0 | 4 |
| 601 | 70 | 6626 | 01/08/1949 | 0 | 2 | 27,07 | 0          | 07/04/2011 | 04/08/2011 | 06/11/2013 | 0   | 8,55  | 7 | 7 | 1 | 0   | 0,1 | 0 | 0 | 5 |
| 602 | 71 | 6626 | 01/08/1949 | 1 | 3 | 27,07 | 0          | 07/04/2011 | 04/08/2011 | 06/11/2013 | 0   | 8,55  | 7 | 7 | 1 | 0   | 0,1 | 0 | 0 | 5 |
| 603 | 72 | 6626 | 01/08/1949 | 1 | 2 | 27,07 | 0          | 07/04/2011 | 04/08/2011 | 06/11/2013 | 0   | 8,55  | 7 | 7 | 1 | 0   | 0,1 | 0 | 0 | 5 |
| 604 | 73 | 5295 | 02/01/1941 | 0 | 1 | 86,10 | 0          | 04/10/2007 | 03/01/2008 | 06/03/2015 | 0   | 2     | 7 | 7 | 0 | 0   | 0,3 | 0 | 0 | 4 |
| 605 | 74 | 5295 | 02/01/1941 | 1 | 1 | 86,10 | 0          | 04/10/2007 | 03/01/2008 | 06/03/2015 | 0   | 2     | 7 | 7 | 0 | 0   | 0,3 | 0 | 0 | 4 |
| 606 | 75 | 5295 | 02/01/1941 | 1 | 1 | 86,10 | 0          | 04/10/2007 | 03/01/2008 | 06/03/2015 | 0   | 2     | 7 | 7 | 0 | 0   | 0,3 | 0 | 0 | 4 |
| 607 | 76 | 6808 | 29/08/1962 | 0 | 1 | 40,77 | 0          | 04/07/2011 | 22/08/2011 | 15/01/2015 | 0   | 26    | 8 | 7 | 1 | 0   | 0,2 | 0 | 0 | 5 |
| 608 | 77 | 6808 | 29/08/1962 | 1 | 2 | 40,77 | 0          | 04/07/2011 | 22/08/2011 | 15/01/2015 | 0   | 26    | 8 | 7 | 1 | 0   | 0,2 | 0 | 0 | 5 |
| 609 | 78 | 6808 | 29/08/1962 | 1 | 2 | 40,77 | 0          | 04/07/2011 | 22/08/2011 | 15/01/2015 | 0   | 26    | 8 | 7 | 1 | 0   | 0,2 | 0 | 0 | 5 |
| 610 | 79 | 5535 | 02/07/1947 | 1 | 0 | 29,30 | 0          | 08/01/2009 | 17/06/2011 | 0          | 7,5 | 7     | 7 | 0 | 0 | 0,1 | 0   | 0 | 2 |   |
| 611 | 80 | 5535 | 02/07/1947 | 1 | 2 | 29,30 | 0          | 08/01/2009 | 17/06/2011 | 0          | 7,5 | 7     | 7 | 0 | 0 | 0,1 | 0   | 0 | 2 |   |
| 612 | 81 | 5535 | 02/07/1947 | 1 | 2 | 29,30 | 0          | 08/01/2009 | 17/06/2011 | 0          | 7,5 | 7     | 7 | 0 | 0 | 0,1 | 0   | 0 | 2 |   |
| 613 | 82 | 6958 | 08/04/1942 | 0 | 1 | 39,53 | 0          | 23/06/2011 | 29/09/2011 | 15/01/2015 | 0   | 5,97  | 7 | 7 | 0 | 0   | 0,3 | 0 | 0 | 4 |
| 614 | 83 | 6874 | 01/10/1943 | 1 | 1 | 36,37 | 0          | 11/08/2011 | 27/09/2011 | 08/10/2014 | 0   | 3,2   | 7 | 7 | 0 | 0   | 0,6 | 0 | 0 | 4 |
| 615 | 84 | 6893 | 25/05/1951 | 0 | 1 | 25,63 | 0          | 02/06/2011 | 06/10/2011 | 25/11/2013 | 0   | 5,7   | 7 | 7 | 0 | 0   | 0,3 | 0 | 0 | 4 |
| 616 | 85 | 5309 | 02/05/1943 | 1 | 1 | 3,20  | 0          | 18/09/2007 | 22/01/2008 | 28/04/2008 | 0   | 6,06  | 6 | 6 | 0 | 0   | 0,5 | 0 | 0 | 4 |
| 617 | 86 | 6876 | 09/10/1947 | 0 | 1 | 35,77 | 0          | 28/03/2011 | 29/09/2011 | 22/09/2014 | 0   | 7     | 7 | 7 | 0 | 0   | 0,6 | 0 | 0 | 4 |
| 618 | 87 | 6770 | 10/02/1946 | 1 | 2 | 43,33 | 0          | 22/06/2011 | 02/08/2011 | 12/03/2015 | 0   | 8,1   | 8 | 9 | 1 | 1   | 0,3 | 1 | 0 | 6 |
| 619 | 88 | 6770 | 10/02/1946 | 1 | 1 | 43,33 | 0          | 22/06/2011 | 02/08/2011 | 12/03/2015 | 0   | 8,1   | 8 | 9 | 1 | 1   | 0,3 | 1 | 0 | 6 |
| 620 | 89 | 5877 | 01/06/1951 | 1 | 1 | 11,13 | 1          | 26/08/2009 | 31/05/2010 | 04/05/2011 | 1   | 32,25 | 9 | 0 | 0 | 1   | 1,0 | 1 | 0 | 6 |
| 621 | 90 | 5877 | 01/06/1951 | 1 | 1 | 11,13 | 1          | 26/08/2009 | 31/05/2010 | 04/05/2011 | 1   | 32,25 | 9 | 0 | 0 | 1   | 1,0 | 1 | 0 | 6 |
| 622 | 91 | 6112 | 16/10/1940 | 1 | 2 | 54,73 | 0          | 16/04/2010 | 26/07/2010 | 18/02/2015 | 0   | 8,1   | 9 | 0 | 0 | 0   | 0,5 | 1 | 0 | 5 |
| 623 | 92 | 6112 | 16/10/1940 | 1 | 1 | 54,73 | 0          | 16/04/2010 | 26/07/2010 | 18/02/2015 | 0   | 8,1   | 9 | 0 | 0 | 0   | 0,5 | 1 | 0 | 5 |
| 624 | 93 | 5120 | 11/03/1944 | 0 | 1 | 11,47 | 1          | 07/07/2008 | 21/10/2008 | 05/10/2009 | 1   | 6,2   | 8 | 0 | 0 | 0   | 0,4 | 2 | 1 | 4 |
| 625 | 94 | 5120 | 11/03/1944 | 0 | 2 | 11,47 | 1          | 07/07/2008 | 21/10/2008 | 05/10/2009 | 1   | 6,2   | 8 | 0 | 0 | 0   | 0,4 | 2 | 1 | 4 |

|     |     |      |            |   |   |       |   |            |            |            |   |       |    |   |   |   |     |     |   |   |   |
|-----|-----|------|------------|---|---|-------|---|------------|------------|------------|---|-------|----|---|---|---|-----|-----|---|---|---|
| 626 | 95  | 6755 | 20/01/1954 | 1 | 2 | 38,17 | 0 | 02/02/2011 | 19/07/2011 | 24/09/2014 | 0 | 6,9   | 7  | 0 | 0 | 0 | 0,6 | 1   | 0 | 4 |   |
| 627 | 96  | 6755 | 20/01/1954 | 1 | 2 | 38,17 | 0 | 02/02/2011 | 19/07/2011 | 24/09/2014 | 0 | 6,9   | 7  | 0 | 0 | 0 | 0,6 | 1   | 0 | 4 |   |
| 628 | 97  | 5779 | 01/02/1953 | 1 | 2 | 59,60 | 1 | 26/08/2009 | 03/11/2009 | 21/10/2014 | 1 | 6,3   | 7  | 7 | 1 | 1 | 0,8 | 0   | 1 | 6 |   |
| 629 | 98  | 5779 | 01/02/1953 | 1 | 1 | 59,60 | 1 | 26/08/2009 | 03/11/2009 | 21/10/2014 | 1 | 6,3   | 7  | 7 | 1 | 1 | 0,8 | 0   | 1 | 6 |   |
| 630 | 99  | 5735 | 13/05/1948 | 1 | 2 | 18,77 | 1 | 07/10/2009 | 10/03/2010 | 03/10/2011 | 1 | 34    | 9  | 9 | 1 | 1 | 0,6 | 1   | 1 | 6 |   |
| 631 | 100 | 5735 | 13/05/1948 | 1 | 0 | 18,77 | 1 | 07/10/2009 | 10/03/2010 | 03/10/2011 | 1 | 34    | 9  | 9 | 1 | 1 | 0,6 | 1   | 1 | 6 |   |
| 632 | 101 | 6106 | 16/10/1941 | 1 | 0 | 58,43 | 1 | 10/02/2010 | 14/07/2010 | 27/05/2015 | 1 | 24,48 | 7  | 7 | 1 | 1 | 1   | 0,8 | 1 | 1 | 6 |
| 633 | 102 | 6106 | 16/10/1941 | 1 | 0 | 58,43 | 1 | 10/02/2010 | 14/07/2010 | 27/05/2015 | 1 | 24,48 | 7  | 7 | 1 | 1 | 1   | 0,8 | 1 | 1 | 6 |
| 634 | 103 | 6765 | 27/01/1942 | 1 | 2 |       | 1 | 13/04/2010 | 14/07/2010 | 14/07/2010 | 1 | 32    | 8  | 9 | 0 | 1 | 1   | 0,6 | 0 | 1 | 6 |
| 635 | 104 | 6765 | 27/01/1942 | 1 | 1 |       | 1 | 13/04/2010 | 14/07/2010 | 14/07/2010 | 1 | 32    | 8  | 9 | 0 | 1 | 1   | 0,6 | 0 | 1 | 6 |
| 636 | 105 | 6364 | 15/03/1946 | 1 | 1 | 24,03 | 1 | 18/11/2008 | 23/09/2010 | 24/09/2012 | 1 | 11,7  | 9  |   | 1 | 1 | 1   | 0,3 | 1 | 1 | 5 |
| 637 | 106 | 6364 | 15/03/1946 | 1 | 1 | 24,03 | 1 | 18/11/2008 | 23/09/2010 | 24/09/2012 | 1 | 11,7  | 9  |   | 1 | 1 | 1   | 0,3 | 1 | 1 | 5 |
| 638 | 107 | 6274 | 16/06/1951 | 1 | 1 |       | 0 | 06/08/2010 | 02/11/2010 | 02/11/2010 | 0 | 27,5  | 7  | 9 | 1 | 0 | 1   | 0,7 | 0 | 0 | 5 |
| 639 | 108 | 6274 | 16/06/1951 | 1 | 2 |       | 0 | 06/08/2010 | 02/11/2010 | 02/11/2010 | 0 | 27,5  | 7  | 9 | 1 | 0 | 1   | 0,7 | 0 | 0 | 5 |
| 640 | 109 | 6956 | 11/10/1946 | 1 | 2 | 33,83 | 1 | 04/11/2010 | 21/12/2010 | 16/10/2013 | 1 | 11,95 | 8  | 9 | 1 | 1 | 1   | 0,2 | 0 | 1 | 6 |
| 641 | 110 | 6956 | 11/10/1946 | 1 | 2 | 33,83 | 1 | 04/11/2010 | 21/12/2010 | 16/10/2013 | 1 | 11,95 | 8  | 9 | 1 | 1 | 1   | 0,2 | 0 | 1 | 6 |
| 642 | 111 | 6387 | 26/07/1941 | 1 | 0 | 43,50 | 1 | 28/10/2010 | 26/01/2011 | 11/09/2014 | 1 | 9,2   | 7  | 9 | 1 | 1 | 1   | 0,2 | 0 | 1 | 6 |
| 643 | 112 | 6387 | 26/07/1941 | 1 | 1 | 43,50 | 1 | 28/10/2010 | 26/01/2011 | 11/09/2014 | 1 | 9,2   | 7  | 9 | 1 | 1 | 1   | 0,2 | 0 | 1 | 6 |
| 644 | 113 | 640  | 04/07/1929 | 1 | 2 |       | 1 |            |            |            | 1 |       |    |   | 0 |   |     |     |   |   | 0 |
| 645 | 114 | 640  | 04/07/1929 | 1 | 1 |       | 1 |            |            |            | 1 |       |    |   | 0 |   |     |     |   |   | 0 |
| 646 | 115 | 6436 | 12/03/1940 | 1 | 1 | 22,40 | 1 | 06/12/2010 | 01/02/2011 | 13/12/2012 | 1 | 6,7   | 7  | 7 | 1 | 1 | 1   | 1,0 | 0 | 1 | 6 |
| 647 | 116 | 6436 | 12/03/1940 | 1 | 1 | 22,40 | 1 | 06/12/2010 | 01/02/2011 | 13/12/2012 | 1 | 6,7   | 7  | 7 | 1 | 1 | 1   | 1,0 | 0 | 1 | 6 |
| 648 | 117 | 6525 | 10/05/1962 | 1 | 2 | 11,80 | 1 | 21/01/2011 | 07/03/2011 | 01/03/2012 | 1 | 15    | 7  | 9 | 1 | 1 | 1   | 0,8 | 0 | 1 | 6 |
| 649 | 118 | 6525 | 10/05/1962 | 1 | 2 | 11,80 | 1 | 21/01/2011 | 07/03/2011 | 01/03/2012 | 1 | 15    | 7  | 9 | 1 | 1 | 1   | 0,8 | 0 | 1 | 6 |
| 650 | 119 | 6535 | 28/10/1942 | 1 | 2 | 21,77 | 1 | 30/06/2010 | 17/03/2011 | 10/01/2013 | 1 | 79,9  | 9  |   | 1 | 1 | 1   | 0,8 | 1 | 1 | 6 |
| 651 | 120 | 6535 | 28/10/1942 | 1 | 2 | 21,77 | 1 | 30/06/2010 | 17/03/2011 | 10/01/2013 | 1 | 79,9  | 9  |   | 1 | 1 | 1   | 0,8 | 1 | 1 | 6 |
| 652 | 121 | 6564 | 02/03/1947 | 1 | 2 | 10,27 | 1 | 02/02/2011 | 08/04/2011 | 16/02/2012 | 1 | 5,4   | 9  | 9 | 1 | 0 | 0   | 0,3 | 0 | 1 | 5 |
| 653 | 122 | 6564 | 02/03/1947 | 1 | 2 | 10,27 | 1 | 02/02/2011 | 08/04/2011 | 16/02/2012 | 1 | 5,4   | 9  | 9 | 1 | 0 | 0   | 0,3 | 0 | 1 | 5 |
| 654 | 123 | 6574 | 06/01/1943 | 1 | 1 | 10,53 | 1 | 08/02/2011 | 11/04/2011 | 27/02/2012 | 1 | 13    | 10 | 9 | 1 | 1 | 0   | 0,7 | 0 | 1 | 7 |
| 655 | 124 | 6574 | 06/01/1943 | 1 | 1 | 10,53 | 1 | 08/02/2011 | 11/04/2011 | 27/02/2012 | 1 | 13    | 10 | 9 | 1 | 1 | 0   | 0,7 | 0 | 1 | 7 |
| 656 | 125 | 6616 | 11/11/1949 | 1 | 0 | 18,50 | 1 | 12/04/2011 | 19/05/2011 | 04/12/2012 | 1 | 9,61  | 8  | 9 | 0 | 0 | 1   | 0,3 | 0 | 1 | 4 |
| 657 | 126 | 6616 | 11/11/1949 | 1 | 0 | 18,50 | 1 | 12/04/2011 | 19/05/2011 | 04/12/2012 | 1 | 9,61  | 8  | 9 | 0 | 0 | 1   | 0,3 | 0 | 1 | 4 |
| 658 | 127 | 6697 | 11/05/1939 | 1 | 1 | 8,73  | 1 | 05/04/2011 | 06/06/2011 | 28/02/2012 | 1 | 5,8   | 9  | 9 | 1 | 0 | 1   | 0,3 | 0 | 0 | 5 |
| 659 | 128 | 6697 | 11/05/1939 | 1 | 1 | 8,73  | 1 | 05/04/2011 | 06/06/2011 | 28/02/2012 | 1 | 5,8   | 9  | 9 | 1 | 0 | 1   | 0,3 | 0 | 0 | 5 |
| 660 | 129 | 1387 | 14/09/1919 | 1 | 2 |       | 0 | 29/03/1995 |            |            | 0 |       | 9  |   | 0 |   |     | 0,2 | 0 | 0 |   |
| 661 | 130 | 1387 | 14/09/1919 | 1 | 1 |       | 0 | 29/03/1995 |            |            | 0 |       | 9  |   | 0 |   |     | 0,2 | 0 | 0 |   |
| 662 | 131 | 1517 | 15/10/1930 | 1 | 0 |       | 1 | 20/10/1995 | 29/12/1995 |            | 1 | 5     | 4  | 0 | 0 | 1 |     |     |   | 0 | 4 |
| 663 | 132 | 1517 | 15/10/1930 | 1 | 0 |       | 1 | 20/10/1995 | 29/12/1995 |            | 1 | 5     | 4  | 0 | 0 | 1 |     |     |   | 0 | 4 |
| 664 | 133 | 1626 | 30/05/1930 | 1 | 0 | 73,77 | 0 | 12/06/1996 | 10/10/1996 | 03/12/2002 | 1 | 40    | 8  | 7 | 0 | 0 | 0   |     | 1 | 0 | 2 |
| 665 | 134 | 1626 | 30/05/1930 | 1 | 1 | 73,77 | 0 | 12/06/1996 | 10/10/1996 | 03/12/2002 | 1 | 40    | 8  | 7 | 0 | 0 | 0   |     | 1 | 0 | 2 |
| 666 | 135 | 1701 | 07/10/1907 | 1 | 2 |       | 0 | 20/09/1996 |            | 19/07/2000 | 0 |       | 9  |   | 0 |   |     |     |   | 0 |   |
| 667 | 136 | 1701 | 07/10/1907 | 1 | 1 |       | 0 | 20/09/1996 |            | 19/07/2000 | 0 |       | 9  |   | 0 |   |     |     |   | 0 |   |
| 668 | 137 | 5094 | 21/07/1950 | 1 | 1 | 28,97 | 1 | 07/04/2008 | 17/07/2008 | 16/12/2010 | 1 | 31,26 | 7  | 9 | 1 | 0 | 1   | 0,9 | 0 | 0 | 5 |
| 669 | 138 | 5094 | 21/07/1950 | 1 | 1 | 28,97 | 1 | 07/04/2008 | 17/07/2008 | 16/12/2010 | 1 | 31,26 | 7  | 9 | 1 | 0 | 1   | 0,9 | 0 | 0 | 5 |
| 670 | 139 | 4999 | 02/09/1945 | 1 | x | 10,37 | 1 | 11/09/2007 | 29/07/2008 | 10/06/2009 | 1 | 3,3   | 7  | 8 | 1 | 0 | 1   | 0,2 | 1 | 0 | 5 |
| 671 | 140 | 4999 | 02/09/1945 | 1 | 3 | 10,37 | 1 | 11/09/2007 | 29/07/2008 | 10/06/2009 | 1 | 3,3   | 7  | 8 | 1 | 0 | 1   | 0,2 | 1 | 0 | 5 |
| 672 | 141 | 5053 | 09/01/1940 | 1 | x | 20,67 | 1 | 24/01/2008 | 03/06/2008 | 23/02/2010 | 1 | 4,32  | 7  | 7 | 0 | 0 | 0   | 0,2 | 0 | 0 | 4 |
| 673 | 142 | 5053 | 09/01/1940 | 1 | 2 | 20,67 | 1 | 24/01/2008 | 03/06/2008 | 23/02/2010 | 1 | 4,32  | 7  | 7 | 0 | 0 | 0   | 0,2 | 0 | 0 | 4 |
| 674 | 143 | 5121 | 01/03/1935 | 1 | 1 |       | 1 | 09/07/2008 | 30/01/2009 |            | 1 |       | 10 |   | 0 |   |     |     | 1 | 0 | 2 |
| 675 | 144 | 5121 | 01/03/1935 | 1 | x |       | 1 | 09/07/2008 | 30/01/2009 |            | 1 |       | 10 |   | 0 |   |     |     | 1 | 0 | 2 |
| 676 | 145 | 2504 | 10/03/1938 | 1 | 2 | 99,03 | 0 | 15/12/1999 | 12/10/2000 | 13/01/2009 | 0 | 41    | 7  |   | 0 | 0 | 0   | 0,4 | 1 | 0 | 4 |
| 677 | 146 | 2504 | 10/03/1938 | 1 | 0 | 99,03 | 0 | 15/12/1999 | 12/10/2000 | 13/01/2009 | 0 | 41    | 7  |   | 0 | 0 | 0   | 0,4 | 1 | 0 | 4 |
| 678 | 147 | 2269 | 02/08/1929 | 1 | 1 |       | 1 | 02/12/1999 |            | 05/11/2009 | 1 |       | 10 |   | 0 |   |     |     | 1 | 2 | 1 |
| 679 | 148 | 2269 | 02/08/1929 | 1 | 1 |       | 1 | 02/12/1999 |            | 05/11/2009 | 1 |       | 10 |   | 0 |   |     |     | 1 | 2 | 1 |
| 680 | 149 | 2776 | 11/07/1923 | 1 | 1 |       | 0 |            |            |            | 0 |       |    |   | 0 |   |     |     |   | 0 |   |
| 681 | 150 | 2776 | 11/07/1923 | 1 | 1 |       | 0 |            |            |            | 0 |       |    |   | 0 |   |     |     |   | 0 |   |
| 682 | 151 | 2774 | 10/10/1928 | 1 | 1 |       | 1 |            |            | 10/07/2001 | 1 |       | 8  |   | 0 |   |     |     | 1 | 0 | 5 |
| 683 | 152 | 2774 | 10/10/1928 | 1 | 2 |       | 1 |            |            | 10/07/2001 | 1 |       | 8  |   | 0 |   |     |     | 1 | 0 | 5 |
| 684 | 153 | 5628 | 22/11/1944 | 1 | 2 | 28,33 | 1 | 29/05/2009 | 01/09/2009 | 11/01/2012 | 1 | 3,17  | 9  | 9 | 1 | 1 | 1   | 0,8 | 1 | 2 | 6 |
| 685 | 154 | 5628 | 22/11/1944 | 1 | 2 | 28,33 | 1 | 29/05/2009 | 01/09/2009 | 11/01/2012 | 1 | 3,17  | 9  | 9 | 1 | 1 | 1   | 0,8 | 1 | 2 | 6 |
| 686 | 155 | 1280 | 31/07/1936 | 1 | x | 22,87 | 1 | 23/08/1994 | 11/10/1994 | 07/09/1996 | 1 | 32    | 7  | 6 | 1 | 0 | 1   | 0,2 | 0 | 0 | 5 |
| 687 | 156 | 1280 | 31/07/1936 | 1 | 1 | 22,87 | 1 | 23/08/1994 | 11/10/1994 | 07/09/1996 | 1 | 32    | 7  | 6 | 1 | 0 | 1   | 0,2 | 0 | 0 | 5 |
| 688 | 157 | 4153 | 17/11/1930 | 1 | 1 | 11,03 | 1 | 01/04/2005 | 22/12/2008 | 23/11/2009 | 1 | 9     | 9  | 9 | 1 | 1 | 1   | 1,0 | 0 | 2 | 7 |
| 689 | 158 | 4153 | 17/11/1930 | 1 | 0 | 11,03 | 1 | 01/04/2005 | 22/12/2008 | 23/11/2009 | 1 | 9     | 9  | 9 | 1 | 1 | 1   | 1,0 | 0 | 2 | 7 |
| 690 | 159 | 5695 | 22/04/1944 | 1 | 2 | 62,87 | 0 | 17/08/2009 | 23/10/2009 | 19/01/2015 | 0 | 4,6   | 8  | 9 | 1 | 0 | 0   | 0,8 | 0 | 0 | 5 |
| 691 | 160 | 5695 | 22/04/1944 | 1 | 1 | 62,87 | 0 | 17/08/2009 | 23/10/2009 | 19/01/2015 | 0 | 4,6   | 8  | 9 | 1 | 0 | 0   | 0,8 | 0 | 0 | 5 |
| 692 | 161 | 1175 | 31/03/1927 | 1 | 2 |       | 0 | 23/03/1994 |            |            | 0 | 7,4   | 5  |   | 0 |   |     | 1,0 | 1 | 0 | 5 |
| 693 | 162 | 1175 | 31/03/1927 | 1 | 2 |       | 0 | 23/03/1994 |            |            | 0 | 7,4   | 5  |   | 0 |   |     | 1,0 | 1 | 0 | 5 |
| 694 | 163 | 1518 | 21/06/1921 | 1 | 2 |       | 0 |            |            |            | 0 |       |    |   | 0 |   |     |     |   | 0 |   |
| 695 | 164 | 1518 | 21/06/1921 | 1 | 1 |       | 0 |            |            |            | 0 |       |    |   | 0 |   |     |     |   | 0 |   |
| 696 | 165 | 5258 | 25/01/1929 | 1 | 2 |       | 1 | 30/11/1995 |            |            | 1 | 10,1  |    |   |   |   |     |     |   |   |   |

|     |     |      |            |   |   |       |   |            |            |            |   |       |    |    |   |   |     |     |   |   |   |
|-----|-----|------|------------|---|---|-------|---|------------|------------|------------|---|-------|----|----|---|---|-----|-----|---|---|---|
| 700 | 169 | 6270 | 09/05/1931 | 1 | 2 |       | 1 | 01/01/2007 |            | 03/03/2010 | 1 | 250   |    |    | 0 |   |     |     | 1 | 1 |   |
| 701 | 170 | 6270 | 09/05/1931 | 1 | 2 |       | 1 | 01/01/2007 |            | 03/03/2010 | 1 | 250   |    |    | 0 |   |     |     | 1 | 1 |   |
| 702 | 171 | 3603 | 25/10/1930 | 1 | 1 | 34,87 | 1 | 21/08/2003 | 31/05/2004 | 26/04/2007 | 1 | 6,7   | 10 |    |   |   | 0,8 | 1   | 2 | 4 |   |
| 703 | 172 | 3603 | 25/10/1930 | 1 | 1 | 34,87 | 1 | 21/08/2003 | 31/05/2004 | 26/04/2007 | 1 | 6,7   | 10 |    |   |   | 0,8 | 1   | 2 | 4 |   |
| 704 | 173 | 5105 | 09/08/1932 | 1 | 1 | 1,13  | 1 | 13/05/2008 | 12/05/2008 | 16/06/2008 | 1 | 15    | 9  |    |   |   | 1,0 | 0   | 1 | 4 |   |
| 705 | 174 | 5105 | 09/08/1932 | 1 | 1 | 1,13  | 1 | 13/05/2008 | 13/05/2008 | 17/06/2008 | 1 | 15    | 9  |    |   |   | 1,0 | 0   | 1 | 4 |   |
| 706 | 175 | 6951 | 12/08/1947 | 1 | 1 |       | 1 | 26/09/2010 |            | 10/05/2012 | 1 | 71    | 8  |    |   |   |     | 1   | 2 | 5 |   |
| 707 | 176 | 6951 | 12/08/1947 | 1 | 3 |       | 1 | 26/09/2010 |            | 10/05/2012 | 1 | 71    | 8  |    |   |   |     | 1   | 2 | 5 |   |
| 709 | 1   | 5528 | 14/05/1952 | 1 | 1 | 69,27 | 0 | 06/11/2008 | 23/06/2009 | 01/04/2015 | 0 | 36,43 | 7  | 7  | 1 | 0 | 0   | 0,2 | 2 | 0 | 5 |
| 710 | 2   | 5528 | 14/05/1952 | 1 | 1 | 69,27 | 0 | 06/11/2008 | 23/06/2009 | 01/04/2015 | 0 | 36,43 | 7  | 7  | 1 | 0 | 0   | 0,2 | 2 | 0 | 5 |
| 711 | 3   | 5575 | 04/06/1940 | 1 | x | 56,97 | 1 | 21/10/2008 | 16/07/2009 | 15/04/2014 | 1 | 11,8  | 8  |    | 1 | 0 | 0   | 0,5 | 2 | 0 | 5 |
| 712 | 4   | 5575 | 04/06/1940 | 1 | 1 | 56,97 | 1 | 21/10/2008 | 16/07/2009 | 15/04/2014 | 1 | 11,8  | 8  |    | 1 | 0 | 0   | 0,5 | 2 | 0 | 5 |
| 713 | 5   | 5538 | 10/03/1952 | 1 | x | 14,07 | 1 | 24/11/2008 | 07/07/2009 | 09/09/2010 | 1 | 6,2   | 9  | 9  | 1 | 1 | 1   | 0,8 | 2 | 1 | 7 |
| 714 | 6   | 5538 | 10/03/1952 | 1 | x | 14,07 | 1 | 24/11/2008 | 07/07/2009 | 09/09/2010 | 1 | 6,2   | 9  | 9  | 1 | 1 | 1   | 0,8 | 2 | 1 | 7 |
| 715 | 7   | 5917 | 05/06/1942 | 1 | x | 65,60 | 0 | 09/04/2009 | 13/10/2009 | 31/03/2015 | 0 | 11    | 9  | 9  | 0 | 0 | 0   | 0,4 | 2 | 0 | 2 |
| 716 | 8   | 5917 | 05/06/1942 | 1 | 1 | 65,60 | 0 | 09/04/2009 | 13/10/2009 | 31/03/2015 | 0 | 11    | 9  | 9  | 0 | 0 | 0   | 0,4 | 2 | 0 | 2 |
| 717 | 9   | 5826 | 21/05/1954 | 1 | 2 | 58,67 | 0 | 21/07/2009 | 12/01/2010 | 02/12/2014 | 0 | 17,48 | 8  | 9  | 1 | 0 | 0   | 0,6 | 2 | 0 | 5 |
| 718 | 10  | 5826 | 21/05/1954 | 1 | 2 | 58,67 | 0 | 21/07/2009 | 12/01/2010 | 02/12/2014 | 0 | 17,48 | 8  | 9  | 1 | 0 | 0   | 0,6 | 2 | 0 | 5 |
| 719 | 11  | 5877 | 01/06/1951 | 1 | 1 | 11,13 | 1 | 26/08/2009 | 31/05/2010 | 04/05/2011 | 1 | 32,25 | 9  |    | 0 | 1 | 1   | 1,0 | 2 | 0 | 6 |
| 720 | 12  | 5877 | 01/06/1951 | 1 | 1 | 11,13 | 1 | 26/08/2009 | 31/05/2010 | 04/05/2011 | 1 | 32,25 | 9  |    | 0 | 1 | 1   | 1,0 | 2 | 0 | 6 |
| 721 | 13  | 5740 | 04/07/1948 | 1 | x | 59,80 | 0 | 14/05/2009 | 10/05/2010 | 04/05/2015 | 0 | 5,6   | 8  |    | 0 | 0 | 0   | 0,3 | 2 | 0 | 2 |
| 722 | 14  | 5740 | 04/07/1948 | 1 | x | 59,80 | 0 | 14/05/2009 | 10/05/2010 | 04/05/2015 | 0 | 5,6   | 8  |    | 0 | 0 | 0   | 0,3 | 2 | 0 | 2 |
| 723 | 15  | 6124 | 25/02/1948 | 1 | 1 | 43,93 | 0 | 18/12/2009 | 05/08/2010 | 03/04/2014 | 0 | 22,14 | 9  |    | 0 | 0 | 0   | 0,5 | 2 | 0 | 4 |
| 724 | 16  | 6124 | 25/02/1948 | 1 | 1 | 43,93 | 0 | 18/12/2009 | 05/08/2010 | 03/04/2014 | 0 | 22,14 | 9  |    | 0 | 0 | 0   | 0,5 | 2 | 0 | 4 |
| 725 | 17  | 5908 | 15/07/1947 | 1 | 1 | 52,87 | 0 | 21/12/2009 | 27/04/2010 | 23/09/2014 | 0 | 16,74 | 8  | 8  | 0 | 0 | 0   | 0,2 | 2 | 0 | 2 |
| 726 | 18  | 5908 | 15/07/1947 | 1 | 2 | 52,87 | 0 | 21/12/2009 | 27/04/2010 | 23/09/2014 | 0 | 16,74 | 8  | 8  | 0 | 0 | 0   | 0,2 | 2 | 0 | 2 |
| 727 | 19  | 6164 | 28/03/1936 | 1 | 2 | 27,27 | 1 | 13/01/2010 | 26/08/2010 | 04/12/2012 | 1 | 6,3   | 8  | 9  | 1 | 1 | 0   | 0,5 | 2 | 0 | 5 |
| 728 | 20  | 6164 | 28/03/1936 | 1 | 2 | 27,27 | 1 | 13/01/2010 | 26/08/2010 | 04/12/2012 | 1 | 6,3   | 8  | 9  | 1 | 1 | 0   | 0,5 | 2 | 0 | 5 |
| 729 | 21  | 6252 | 25/05/1946 | 1 | x | 51,43 | 0 | 18/03/2010 | 29/10/2010 | 12/02/2015 | 0 | 10,9  | 8  |    | 0 | 0 | 0   | 0,4 | 2 | 0 | 4 |
| 730 | 22  | 6252 | 25/05/1946 | 1 | 0 | 51,43 | 0 | 18/03/2010 | 29/10/2010 | 12/02/2015 | 0 | 10,9  | 8  |    | 0 | 0 | 0   | 0,4 | 2 | 0 | 4 |
| 731 | 23  | 6129 | 15/07/1945 | 1 | 1 | 50,23 | 1 | 22/04/2010 | 16/11/2010 | 23/01/2015 | 1 | 5,99  | 9  |    | 0 | 0 | 1   | 0,6 | 2 | 0 | 4 |
| 732 | 24  | 6129 | 15/07/1945 | 1 | 1 | 50,23 | 1 | 22/04/2010 | 16/11/2010 | 23/01/2015 | 1 | 5,99  | 9  |    | 0 | 0 | 1   | 0,6 | 2 | 0 | 4 |
| 733 | 25  | 6474 | 09/08/1947 | 1 | 0 | 50,23 | 0 | 24/06/2010 | 14/02/2011 | 21/04/2015 | 0 | 6,2   | 9  | 7  | 1 | 0 | 0   | 0,3 | 2 | 0 | 5 |
| 734 | 26  | 6474 | 09/08/1947 | 1 | 0 | 50,23 | 0 | 24/06/2010 | 14/02/2011 | 21/04/2015 | 0 | 6,2   | 9  | 7  | 1 | 0 | 0   | 0,3 | 2 | 0 | 5 |
| 735 | 27  | 6334 | 14/05/1960 | 1 | 1 | 11,97 | 1 | 12/10/2010 | 02/05/2011 | 01/05/2012 | 1 | 9,9   | 9  | 7  | 0 | 0 | 0   | 0,4 | 2 | 0 | 2 |
| 736 | 28  | 6334 | 14/05/1960 | 1 | 1 | 11,97 | 1 | 12/10/2010 | 02/05/2011 | 01/05/2012 | 1 | 9,9   | 9  | 7  | 0 | 0 | 0   | 0,4 | 2 | 0 | 2 |
| 737 | 29  | 6501 | 06/09/1961 | 1 | 2 | 13,43 | 1 | 14/12/2010 | 22/07/2011 | 05/09/2012 | 1 | 44,38 | 8  |    | 1 | 1 | 1   | 1,0 | 2 | 1 | 6 |
| 738 | 30  | 6501 | 06/09/1961 | 1 | 2 | 13,43 | 1 | 14/12/2010 | 22/07/2011 | 05/09/2012 | 1 | 44,38 | 8  |    | 1 | 1 | 1   | 1,0 | 2 | 1 | 6 |
| 739 | 31  | 6764 | 25/02/1936 | 1 | 1 | 44,20 | 0 | 11/01/2011 | 25/07/2011 | 01/04/2015 | 0 | 13    | 9  |    | 1 | 0 | 1   | 0,4 | 2 | 0 | 5 |
| 740 | 32  | 6764 | 25/02/1936 | 1 | 1 | 44,20 | 0 | 11/01/2011 | 25/07/2011 | 01/04/2015 | 0 | 13    | 9  |    | 1 | 0 | 1   | 0,4 | 2 | 0 | 5 |
| 741 | 33  | 6979 | 11/09/1929 | 1 | 1 | 22,10 | 1 | 20/12/2007 | 15/11/2012 | 18/09/2014 | 1 | 2,6   | 9  |    | 0 |   |     | 1,0 | 2 | 2 | 4 |
| 742 | 34  | 6979 | 11/09/1929 | 1 | 1 | 22,10 | 1 | 20/12/2007 | 15/11/2012 | 18/09/2014 | 1 | 2,6   | 9  |    | 0 |   |     | 1,0 | 2 | 2 | 4 |
| 743 | 35  | 7069 | 22/03/1962 | 1 | 0 | 41,27 | 0 | 20/05/2011 | 19/12/2011 | 27/05/2015 | 0 | 26,2  | 9  |    | 1 | 0 | 0   | 0,7 | 2 | 0 | 6 |
| 744 | 36  | 7069 | 22/03/1962 | 1 | 0 | 41,27 | 0 | 20/05/2011 | 19/12/2011 | 27/05/2015 | 0 | 26,2  | 9  |    | 1 | 1 | 0   | 0,7 | 2 | 0 | 6 |
| 745 | 37  | 7202 | 29/10/1948 | 1 | 0 | 21,40 | 1 | 30/06/2011 | 21/02/2012 | 03/12/2013 | 1 | 6,95  | 9  | 9  | 1 | 1 | 0   | 0,8 | 2 | 1 | 6 |
| 746 | 38  | 7202 | 29/10/1948 | 1 | 1 | 21,40 | 1 | 30/06/2011 | 21/02/2012 | 03/12/2013 | 1 | 6,95  | 9  | 9  | 1 | 1 | 0   | 0,8 | 2 | 1 | 6 |
| 747 | 39  | 7002 | 26/06/1951 | 1 | 0 | 31,27 | 0 | 13/10/2011 | 24/04/2012 | 02/12/2014 | 0 | 17,1  | 9  |    | 1 | 1 | 0   | 0,5 | 2 | 0 | 5 |
| 748 | 40  | 7002 | 26/06/1951 | 1 | 0 | 31,27 | 0 | 13/10/2011 | 24/04/2012 | 02/12/2014 | 0 | 17,1  | 9  |    | 1 | 1 | 0   | 0,5 | 2 | 0 | 5 |
| 749 | 41  | 7311 | 05/10/1954 | 1 | 2 | 24,70 | 1 | 06/01/2012 | 10/07/2012 | 31/07/2014 | 1 | 11    | 9  |    | 0 | 0 | 0   | 0,3 | 2 | 0 | 4 |
| 750 | 42  | 7311 | 05/10/1954 | 1 | 3 | 24,70 | 1 | 06/01/2012 | 10/07/2012 | 31/07/2014 | 1 | 11    | 9  |    | 0 | 0 | 0   | 0,3 | 2 | 0 | 4 |
| 751 | 43  | 7448 | 23/04/1949 | 1 | 1 | 28,70 | 1 | 13/12/2011 | 28/08/2012 | 19/01/2015 | 1 | 13    | 8  |    | 0 | 0 | 0   | 0,4 | 2 | 1 | 4 |
| 752 | 44  | 7448 | 23/04/1949 | 1 | 1 | 28,70 | 1 | 13/12/2011 | 28/08/2012 | 19/01/2015 | 1 | 13    | 8  |    | 0 | 0 | 0   | 0,4 | 2 | 1 | 4 |
| 753 | 45  | 5479 | 17/04/1947 | 1 | 2 | 57,10 | 0 | 13/08/2008 | 04/11/2008 | 07/08/2013 | 0 | 6     | 9  | 7  | 1 | 0 | 0   | 0,9 | 1 | 0 | 5 |
| 754 | 46  | 5479 | 17/04/1947 | 1 | 2 | 57,10 | 0 | 13/08/2008 | 04/11/2008 | 07/08/2013 | 0 | 6     | 9  | 7  | 1 | 0 | 0   | 0,9 | 1 | 0 | 5 |
| 755 | 47  | 5346 | 19/08/1947 | 1 | 3 | 69,53 | 0 | 28/11/2008 | 03/03/2009 | 19/12/2014 | 0 | 5,7   | 9  | 9  | 1 | 1 | 0   | 0,8 | 0 | 0 | 6 |
| 756 | 48  | 5346 | 19/08/1947 | 1 | 3 | 69,53 | 0 | 28/11/2008 | 03/03/2009 | 19/12/2014 | 0 | 5,7   | 9  | 9  | 1 | 1 | 0   | 0,8 | 0 | 0 | 6 |
| 757 | 49  | 5421 | 10/10/1941 | 1 | 3 | 53,90 | 1 | 23/01/2009 | 31/03/2009 | 27/09/2013 | 1 | 5,48  | 9  | 9  | 1 | 1 | 1   | 0,9 | 0 | 0 | 5 |
| 758 | 50  | 5421 | 10/10/1941 | 1 | 2 | 53,90 | 1 | 23/01/2009 | 31/03/2009 | 27/09/2013 | 1 | 5,48  | 9  | 9  | 1 | 1 | 1   | 0,9 | 0 | 0 | 5 |
| 759 | 51  | 5478 | 12/10/1956 | 1 | 3 | 52,50 | 0 | 03/02/2009 | 14/04/2009 | 29/08/2013 | 0 | 26,06 | 9  | 7  | 0 | 0 | 1   | 0,8 | 0 | 0 | 4 |
| 760 | 52  | 5478 | 12/10/1956 | 1 | 2 | 52,50 | 0 | 03/02/2009 | 14/04/2009 | 29/08/2013 | 0 | 26,06 | 9  | 7  | 0 | 0 | 1   | 0,8 | 0 | 0 | 4 |
| 761 | 53  | 5427 | 21/12/1945 | 1 | 2 | 49,17 | 0 | 04/12/2007 | 23/04/2009 | 28/05/2013 | 0 | 5,2   | 7  | 9  | 1 | 0 | 0   | 0,6 | 0 | 0 | 5 |
| 762 | 54  | 5427 | 21/12/1945 | 1 | 2 | 49,17 | 0 | 04/12/2007 | 23/04/2009 | 28/05/2013 | 0 | 5,2   | 7  | 9  | 1 | 0 | 0   | 0,6 | 0 | 0 | 5 |
| 763 | 55  | 5530 | 05/10/1963 | 1 | 2 | 2,93  | 1 | 21/05/2009 | 23/06/2009 | 21/09/2009 | 1 | 6,3   | 10 | 10 | 1 | 1 | 1   | 0,8 | 1 | 1 | 6 |
| 764 | 56  | 5530 | 05/10/1963 | 1 | 2 | 2,93  | 1 | 21/05/2009 | 23/06/2009 | 21/09/2009 | 1 | 6,3   | 10 | 10 | 1 | 1 | 1   | 0,8 | 1 | 1 | 6 |
| 765 | 57  | 5628 | 22/11/1944 | 1 | 2 | 28,33 | 1 | 29/05/2009 | 01/09/2009 | 11/01/2012 | 1 | 3,17  | 9  | 9  | 1 | 1 | 1   | 0,8 | 1 | 2 | 6 |
| 766 | 58  | 5628 | 22/11/1944 | 1 | 2 | 28,33 | 1 | 29/05/2009 | 01/09/2009 | 11/01/2012 | 1 | 3,17  | 9  | 9  | 1 | 1 | 1   | 0,8 | 1 | 2 | 6 |
| 767 | 59  | 5695 | 22/04/1944 | 1 | 2 | 62,87 | 0 | 17/08/2009 | 23/10/2009 | 19/01/2015 | 0 | 4,6   | 8  | 9  | 1 | 0 | 0   | 0,8 | 0 | 0 | 5 |

|     |    |      |            |   |   |        |   |            |            |            |   |      |    |    |   |   |     |     |   |   |   |
|-----|----|------|------------|---|---|--------|---|------------|------------|------------|---|------|----|----|---|---|-----|-----|---|---|---|
| 768 | 60 | 5695 | 22/04/1944 | 1 | 2 | 62,87  | 0 | 17/08/2009 | 23/10/2009 | 19/01/2015 | 0 | 4,6  | 8  | 9  | 1 | 0 | 0   | 0,8 | 0 | 0 | 5 |
| 769 | 61 | 5755 | 22/06/1956 | 1 | 2 | 55,17  | 1 | 09/12/2009 | 11/02/2010 | 16/09/2014 | 1 | 9,5  | 7  | 7  | 1 | 0 | 1   | 0,9 | 0 | 0 | 7 |
| 770 | 62 | 5755 | 22/06/1956 | 1 | 2 | 55,17  | 1 | 09/12/2009 | 11/02/2010 | 16/09/2014 | 1 | 9,5  | 7  | 7  | 1 | 0 | 1   | 0,9 | 0 | 0 | 7 |
| 771 | 63 | 5784 | 14/03/1957 | 1 | 2 | 58,60  | 0 | 15/12/2009 | 10/03/2010 | 28/01/2015 | 0 | 25   | 6  | 7  | 0 | 0 | 0   | 0,9 | 0 | 0 | 4 |
| 772 | 64 | 5784 | 14/03/1957 | 1 | 2 | 58,60  | 0 | 15/12/2009 | 10/03/2010 | 28/01/2015 | 0 | 25   | 6  | 7  | 0 | 0 | 0   | 0,9 | 0 | 0 | 4 |
| 773 | 65 | 6084 | 26/01/1960 | 1 | 2 | 49,17  | 0 | 19/04/2010 | 23/07/2010 | 28/08/2014 | 0 | 8,7  | 7  | 9  | 1 | 0 | 0   | 0,7 | 0 | 0 | 5 |
| 774 | 66 | 6084 | 26/01/1960 | 1 | 2 | 49,17  | 0 | 19/04/2010 | 23/07/2010 | 28/08/2014 | 0 | 8,7  | 7  | 9  | 1 | 0 | 0   | 0,7 | 0 | 0 | 5 |
| 775 | 67 | 6113 | 13/11/1940 | 1 | 1 | 55,27  | 0 | 28/05/2010 | 26/07/2010 | 04/03/2015 | 0 | 12,5 | 9  | 7  | 1 | 1 | 0   | 0,8 | 0 | 0 | 5 |
| 776 | 68 | 6113 | 13/11/1940 | 1 | 3 | 55,27  | 0 | 28/05/2010 | 26/07/2010 | 04/03/2015 | 0 | 12,5 | 9  | 7  | 1 | 1 | 0   | 0,8 | 0 | 0 | 5 |
| 777 | 69 | 6152 | 12/03/1949 | 1 | 1 | 43,43  | 1 | 26/05/2010 | 19/08/2010 | 02/04/2014 | 1 | 13,3 | 7  | 7  | 1 | 0 | 0   | 0,4 | 0 | 0 | 4 |
| 778 | 70 | 6152 | 12/03/1949 | 1 | 1 | 43,43  | 1 | 26/05/2010 | 19/08/2010 | 02/04/2014 | 1 | 13,3 | 7  | 7  | 1 | 0 | 0   | 0,4 | 0 | 0 | 4 |
| 779 | 71 | 6196 | 13/07/1957 | 1 | 2 | 52,83  | 1 | 30/06/2010 | 07/09/2010 | 02/02/2015 | 1 | 9,9  | 10 | 10 | 1 | 1 | 1   | 1,0 | 0 | 1 | 6 |
| 780 | 72 | 6196 | 13/07/1957 | 1 | 2 | 52,83  | 1 | 30/06/2010 | 07/09/2010 | 02/02/2015 | 1 | 9,9  | 10 | 10 | 1 | 1 | 1   | 1,0 | 0 | 1 | 6 |
| 781 | 73 | 6564 | 02/03/1947 | 1 | 3 | 10,27  | 1 | 02/02/2011 | 08/04/2011 | 16/02/2012 | 1 | 5,4  | 9  | 0  | 9 | 1 | 0   | 0,3 | 0 | 1 | 5 |
| 782 | 74 | 6196 | 13/07/1957 | 1 | 3 | 52,83  | 1 | 30/06/2010 | 07/09/2010 | 02/02/2015 | 1 | 9,9  | 10 | 10 | 1 | 1 | 1   | 1,0 | 0 | 1 | 6 |
| 783 | 75 | 6723 | 17/08/1947 | 1 | 1 | 44,20  | 1 | 08/03/2011 | 28/06/2011 | 04/03/2015 | 1 | 8,9  | 9  |    | 1 | 1 | 1   | 0,4 | 1 | 1 | 5 |
| 784 | 76 | 6723 | 17/08/1947 | 1 | 1 | 44,20  | 1 | 08/03/2011 | 28/06/2011 | 04/03/2015 | 1 | 8,9  | 9  |    | 1 | 1 | 1   | 0,4 | 1 | 1 | 5 |
| 785 | 77 | 6807 | 28/10/1954 | 1 | x | 37,83  | 0 | 05/07/2011 | 22/08/2011 | 17/10/2014 | 0 | 5    | 9  | 9  | 1 | 1 | 0   | 0,3 | 0 | 0 | 5 |
| 786 | 78 | 6807 | 28/10/1954 | 1 | 2 | 37,83  | 0 | 05/07/2011 | 22/08/2011 | 17/10/2014 | 0 | 5    | 9  | 9  | 1 | 1 | 0   | 0,3 | 0 | 0 | 5 |
| 787 | 79 | 6803 | 07/06/1952 | 1 | 2 | 15,43  | 1 | 12/07/2011 | 17/08/2011 | 30/11/2012 | 1 | 5,53 | 9  | 9  | 1 | 1 | 1   | 0,7 | 0 | 0 | 6 |
| 788 | 80 | 6803 | 07/06/1952 | 1 | 3 | 15,43  | 1 | 12/07/2011 | 17/08/2011 | 30/11/2012 | 1 | 5,53 | 9  | 9  | 1 | 1 | 1   | 0,7 | 0 | 0 | 6 |
| 789 | 81 | 7025 | 09/01/1953 | 1 | 3 | 38,03  | 0 | 22/09/2011 | 15/12/2011 | 16/02/2015 | 0 | 5,7  | 8  | 7  | 1 | 0 | 1   | 0,4 | 0 | 0 | 5 |
| 790 | 82 | 7025 | 09/01/1953 | 1 | 3 | 38,03  | 0 | 22/09/2011 | 15/12/2011 | 16/02/2015 | 0 | 5,7  | 8  | 7  | 1 | 0 | 1   | 0,4 | 0 | 0 | 5 |
| 791 | 83 | 7050 | 27/11/1954 | 1 | 1 | 40,37  | 0 | 21/09/2011 | 19/12/2011 | 30/04/2015 | 0 | 2,5  | 7  | 8  | 0 | 0 | 1   | 0,5 | 0 | 0 | 4 |
| 792 | 84 | 7050 | 27/11/1954 | 1 | 1 | 40,37  | 0 | 21/09/2011 | 19/12/2011 | 30/04/2015 | 0 | 2,5  | 7  | 8  | 0 | 0 | 1   | 0,5 | 0 | 0 | 4 |
| 793 | 85 | 7438 | 27/07/1966 | 1 | 1 | 36,20  | 1 | 05/03/2012 | 14/05/2012 | 20/05/2015 | 1 | 6,5  | 9  | 9  | 0 | 0 | 1   | 0,7 | 0 | 1 | 4 |
| 794 | 86 | 7438 | 27/07/1966 | 1 | 1 | 36,20  | 1 | 05/03/2012 | 14/05/2012 | 20/05/2015 | 1 | 6,5  | 9  | 9  | 0 | 0 | 1   | 0,7 | 0 | 1 | 4 |
| 796 | 1  | 3170 | 25/11/1942 | 1 | 3 | 80,23  | 0 | 29/04/2002 | 07/11/2002 | 14/07/2009 | 0 | 6,5  | 6  | 6  | 0 | 0 | 0   | 0,1 | 0 | 0 | 4 |
| 797 | 2  | 3170 | 25/11/1942 | 1 | 3 | 80,23  | 0 | 29/04/2002 | 07/11/2002 | 14/07/2009 | 0 | 6,5  | 6  | 6  | 0 | 0 | 0   | 0,1 | 0 | 0 | 4 |
| 798 | 3  | 3219 | 25/05/1936 | 1 | 3 | 17,70  | 0 | 11/07/2002 | 08/10/2002 | 29/03/2004 | 0 | 9,8  | 6  | 6  | 0 | 0 | 0   | 0,1 | 0 | 0 | 2 |
| 799 | 4  | 3219 | 25/05/1936 | 1 | x | 17,70  | 0 | 11/07/2002 | 08/10/2002 | 29/03/2004 | 0 | 9,8  | 6  | 6  | 0 | 0 | 0   | 0,1 | 0 | 0 | 2 |
| 800 | 5  | 3308 | 23/04/1933 | 1 | x |        | 0 |            | 18/10/2002 |            | 0 |      |    | 7  | 0 | 0 | 0   | 0   | 0 | 0 | 3 |
| 801 | 6  | 3308 | 23/04/1933 | 1 | x |        | 0 |            | 18/10/2002 |            | 0 |      |    | 7  | 0 | 0 | 0   | 0   | 0 | 0 | 3 |
| 802 | 7  | 3264 | 18/07/1956 | 1 | x | 145,87 | 0 | 20/06/2002 | 10/09/2002 | 06/11/2014 | 0 | 3,5  | 6  | 7  | 0 | 0 | 0   | 0,3 | 0 | 0 | 4 |
| 803 | 8  | 3264 | 18/07/1956 | 1 | x | 145,87 | 0 | 20/06/2002 | 10/09/2002 | 06/11/2014 | 0 | 3,5  | 6  | 7  | 0 | 0 | 0   | 0,3 | 0 | 0 | 4 |
| 804 | 9  | 3289 | 02/04/1944 | 1 | x |        | 0 | 19/08/2002 | 25/09/2002 |            | 0 | 7,3  | 9  | 9  | 0 | 0 | 0   | 0,1 | 0 | 0 | 4 |
| 805 | 10 | 3289 | 02/04/1944 | 1 | 2 |        | 0 | 19/08/2002 | 25/09/2002 |            | 0 | 7,3  | 9  | 9  | 0 | 0 | 0   | 0,1 | 0 | 0 | 4 |
| 806 | 11 | 3157 | 08/05/1938 | 1 | x | 85,77  | 0 | 16/04/2002 | 10/09/2002 | 03/11/2009 | 0 | 6,9  | 7  | 6  | 0 | 0 | 0   | 0,1 | 0 | 0 | 4 |
| 807 | 12 | 3157 | 08/05/1938 | 1 | 0 | 85,77  | 0 | 16/04/2002 | 10/09/2002 | 03/11/2009 | 0 | 6,9  | 7  | 6  | 0 | 0 | 0   | 0,1 | 0 | 0 | 4 |
| 808 | 13 | 3269 | 14/09/1938 | 1 | 3 | 60,90  | 0 | 16/09/2002 | 29/10/2002 | 26/11/2007 | 0 | 4,3  | 7  | 7  | 1 | 0 | 1   | 0,9 | 0 | 0 | 5 |
| 809 | 14 | 3269 | 14/09/1938 | 1 | 3 | 60,90  | 0 | 16/09/2002 | 29/10/2002 | 26/11/2007 | 0 | 4,3  | 7  | 7  | 1 | 0 | 1   | 0,9 | 0 | 0 | 5 |
| 810 | 15 | 3272 | 26/05/1931 | 1 | 0 | 49,10  | 0 | 06/06/2002 | 10/09/2002 | 13/10/2006 | 0 | 7,1  | 7  | 7  | 0 | 0 | 0   | 0,3 | 0 | 0 | 4 |
| 811 | 16 | 3272 | 26/05/1931 | 1 | 0 | 49,10  | 0 | 06/06/2002 | 10/09/2002 | 13/10/2006 | 0 | 7,1  | 7  | 7  | 0 | 0 | 0   | 0,3 | 0 | 0 | 4 |
| 812 | 17 | 3270 | 16/05/1944 | 1 | x |        | 0 | 01/05/2002 | 09/09/2002 |            | 0 | 7,6  | 6  | 6  | 0 | 0 | 1   | 0,4 | 0 | 0 | 2 |
| 813 | 18 | 3270 | 16/05/1944 | 1 | x |        | 0 | 01/05/2002 | 09/09/2002 |            | 0 | 7,6  | 6  | 6  | 0 | 0 | 1   | 0,4 | 0 | 0 | 2 |
| 814 | 19 | 2664 | 11/09/1932 | 1 | 0 | 115,87 | 0 | 02/08/2000 | 15/12/2000 | 11/08/2010 | 0 | 8,3  | 7  | 6  | 0 | 0 | 1   | 1,0 | 0 | 0 | 4 |
| 815 | 20 | 2664 | 11/09/1932 | 1 | 0 | 115,87 | 0 | 02/08/2000 | 15/12/2000 | 11/08/2010 | 0 | 8,3  | 7  | 6  | 0 | 0 | 1   | 1,0 | 0 | 0 | 4 |
| 816 | 21 | 2386 | 08/12/1937 | 1 | 3 | 19,60  | 1 | 16/11/1999 | 16/11/1999 | 04/07/2001 | 1 |      |    | 8  | 0 | 1 | 1   | 0   | 0 | 0 | 6 |
| 817 | 22 | 2386 | 08/12/1937 | 1 | 3 | 19,60  | 1 | 16/11/1999 | 16/11/1999 | 04/07/2001 | 1 |      |    | 8  | 0 | 1 | 1   | 0   | 0 | 0 | 6 |
| 818 | 23 | 2695 | 20/05/1931 | 1 | 1 | 163,00 | 0 | 05/10/2000 | 06/03/2001 | 06/10/2014 | 0 | 4    | 7  | 7  | 0 | 0 | 0   | 0,5 | 0 | 0 | 4 |
| 819 | 24 | 2695 | 20/05/1931 | 1 | 2 | 163,00 | 0 | 05/10/2000 | 06/03/2001 | 06/10/2014 | 0 | 4    | 7  | 7  | 0 | 0 | 0   | 0,5 | 0 | 0 | 4 |
| 820 | 25 | 2824 | 04/06/1933 | 1 | x | 21,37  | 0 |            | 15/02/2001 | 26/11/2002 | 0 | 1,8  | 6  | 6  | 0 | 0 | 0   | 0   | 0 | 0 | 2 |
| 821 | 26 | 2824 | 04/06/1933 | 1 | x | 21,37  | 0 |            | 15/02/2001 | 26/11/2002 | 0 | 1,8  | 6  | 6  | 0 | 0 | 0   | 0   | 0 | 0 | 2 |
| 822 | 27 | 3335 | 20/04/1934 | 1 | 2 |        | 0 |            | 31/10/2002 | 31/10/2002 | 0 | 8    | 6  | 6  | 0 | 0 | 0   | 0   | 0 | 0 | 4 |
| 823 | 28 | 3335 | 20/04/1934 | 1 | 2 |        | 0 |            | 31/10/2002 | 31/10/2002 | 0 | 8    | 6  | 6  | 0 | 0 | 0   | 0   | 0 | 0 | 4 |
| 824 | 29 | 2853 | 14/06/1947 | 1 | 2 | 61,17  | 1 | 29/03/2001 | 29/11/2001 | 04/01/2007 | 1 | 4,4  | 7  | 7  | 0 | 0 | 1   | 0,3 | 1 | 0 | 2 |
| 825 | 30 | 3335 | 20/04/1934 | 1 | 2 |        | 0 |            | 31/10/2002 | 31/10/2002 | 0 | 8    | 6  | 6  | 0 | 0 | 0   | 0   | 0 | 0 | 4 |
| 826 | 31 | 2081 | 21/12/1934 | 1 | 2 | 105,00 | 0 | 04/03/1998 | 15/09/1998 | 15/06/2007 | 0 | 5    | 6  | 0  | 0 | 0 | 0,5 | 1   | 0 | 4 |   |
| 827 | 32 | 2081 | 21/12/1934 | 1 | 2 | 105,00 | 0 | 04/03/1998 | 15/09/1998 | 15/06/2007 | 0 | 5    | 6  | 0  | 0 | 0 | 0,5 | 1   | 0 | 4 |   |
| 828 | 33 | 2451 | 09/03/1937 | 1 | 0 | 24,37  | 0 | 04/06/1999 | 09/11/1999 | 20/11/2001 | 0 | 96,8 | 9  |    | 1 | 1 | 1   | 0,7 | 1 | 0 | 6 |
| 829 | 34 | 2451 | 09/03/1937 | 1 | 0 | 24,37  | 0 | 04/06/1999 | 09/11/1999 | 20/11/2001 | 0 | 96,8 | 9  |    | 1 | 1 | 1   | 0,7 | 1 | 0 | 6 |

|     |    |      |            |   |   |        |   |            |            |            |   |      |   |   |   |   |   |     |   |   |   |
|-----|----|------|------------|---|---|--------|---|------------|------------|------------|---|------|---|---|---|---|---|-----|---|---|---|
| 830 | 35 | 2539 | 19/02/1933 | 1 | 2 | 63.03  | 0 | 17/02/2000 | 21/09/2000 | 22/12/2005 | 0 | 9,6  | 7 | 9 | 1 | 1 | 1 | 0,5 | 0 | 0 | 6 |
| 831 | 36 | 2539 | 19/02/1933 | 1 | 2 | 63.03  | 0 | 17/02/2000 | 21/09/2000 | 22/12/2005 | 0 | 9,6  | 7 | 9 | 1 | 1 | 1 | 0,5 | 0 | 0 | 6 |
| 832 | 37 | 2967 | 04/05/1948 | 1 | 2 | 25.03  | 1 | 30/08/2001 | 04/06/2002 | 05/07/2004 | 1 | 14,7 | 7 |   | 1 | 1 | 0 | 0,8 | 1 | 2 | 5 |
| 833 | 38 | 2967 | 04/05/1948 | 1 | x | 25.03  | 1 | 30/08/2001 | 04/06/2002 | 05/07/2004 | 1 | 14,7 | 7 |   | 1 | 1 | 0 | 0,8 | 1 | 2 | 5 |
| 834 | 39 | 2778 | 28/05/1941 | 1 | x | 36,57  | 0 | 04/01/2001 | 09/08/2001 | 26/08/2004 | 0 | 4    | 7 | 7 | 0 | 0 | 0 | 0,1 | 0 | 0 | 4 |
| 835 | 40 | 2778 | 28/05/1941 | 1 | x | 36,57  | 0 | 04/01/2001 | 09/08/2001 | 26/08/2004 | 0 | 4    | 7 | 7 | 0 | 0 | 0 | 0,1 | 0 | 0 | 4 |
| 836 | 41 | 2796 | 10/10/1941 | 1 | 0 |        | 0 | 04/01/2001 | 18/01/2001 | 18/01/2001 | 0 | 4    | 7 |   | 0 | 0 | 1 | 0,1 | 1 | 0 | 4 |
| 837 | 42 | 2796 | 10/10/1941 | 1 | 0 |        | 0 | 04/01/2001 | 18/01/2001 | 18/01/2001 | 0 | 4    | 7 |   | 0 | 0 | 1 | 0,1 | 1 | 0 | 4 |
| 838 | 43 | 2839 | 14/09/1950 | 1 | 1 | 99,27  | 0 | 07/03/2001 | 14/09/2001 | 22/12/2009 | 0 | 13,1 | 6 |   | 0 | 0 | 0 | 0,5 | 1 | 0 | 4 |
| 839 | 44 | 2839 | 14/09/1950 | 1 | 1 | 99,27  | 0 | 07/03/2001 | 14/09/2001 | 22/12/2009 | 0 | 13,1 | 6 |   | 0 | 0 | 0 | 0,5 | 1 | 0 | 4 |
| 840 | 45 | 2869 | 21/07/1947 | 1 | 1 | 4,33   | 0 | 30/12/2001 | 28/02/2002 | 10/07/2002 | 0 | 1,9  | 6 |   | 0 | 0 | 0 | 0,4 | 1 | 0 | 2 |
| 841 | 46 | 2869 | 21/07/1947 | 1 | x | 4,33   | 0 | 30/12/2001 | 28/02/2002 | 10/07/2002 | 0 | 1,9  | 6 |   | 0 | 0 | 0 | 0,4 | 1 | 0 | 2 |
| 842 | 47 | 3002 | 03/10/1945 | 1 | x | 102,37 | 0 | 03/10/2001 | 28/05/2002 | 09/12/2010 | 0 | 7,6  | 8 |   | 1 | 0 | 0 | 1,0 | 1 | 0 | 5 |
| 843 | 48 | 3002 | 03/10/1945 | 1 | x | 102,37 | 0 | 03/10/2001 | 28/05/2002 | 09/12/2010 | 0 | 7,6  | 8 |   | 1 | 0 | 0 | 1,0 | 1 | 0 | 5 |
| 844 | 49 | 2906 | 01/10/1935 | 1 | 2 | 7,20   | 1 | 08/06/2001 | 09/05/2002 | 15/12/2002 | 1 | 15,4 | 6 |   | 0 | 0 | 1 | 0,5 | 1 | 0 | 3 |
| 845 | 50 | 2906 | 01/10/1935 | 1 | 2 | 7,20   | 1 | 08/06/2001 | 09/05/2002 | 15/12/2002 | 1 | 15,4 | 6 |   | 0 | 0 | 1 | 0,5 | 1 | 0 | 3 |
| 846 | 51 | 2901 | 23/07/1945 | 1 | 1 | 7,10   | 0 | 28/05/2001 | 10/01/2002 | 13/08/2002 | 0 | 7,3  | 8 | 7 | 1 | 0 | 1 | 0,5 | 1 | 0 | 5 |
| 847 | 52 | 2901 | 23/07/1945 | 1 | 1 | 7,10   | 0 | 28/05/2001 | 10/01/2002 | 13/08/2002 | 0 | 7,3  | 8 | 7 | 1 | 0 | 1 | 0,5 | 1 | 0 | 5 |
| 848 | 53 | 2656 | 14/12/1942 | 1 | x | 45,20  | 1 | 13/07/2000 | 16/11/2001 | 22/08/2005 | 1 | 15,1 | 9 |   | 1 | 1 | 0 | 0,9 | 1 | 1 | 5 |
| 849 | 54 | 2656 | 14/12/1942 | 1 | 1 | 45,20  | 1 | 13/07/2000 | 16/11/2001 | 22/08/2005 | 1 | 15,1 | 9 |   | 1 | 1 | 0 | 0,9 | 1 | 1 | 5 |
| 850 | 55 | 2822 | 10/05/1937 | 1 | 1 | 93,83  | 0 | 20/02/2001 | 04/12/2001 | 29/09/2009 | 0 | 18,1 | 6 |   | 0 | 0 | 0 | 0,3 | 1 | 0 | 4 |
| 851 | 56 | 2822 | 10/05/1937 | 1 | 1 | 93,83  | 0 | 20/02/2001 | 04/12/2001 | 29/09/2009 | 0 | 18,1 | 6 |   | 0 | 0 | 0 | 0,3 | 1 | 0 | 4 |
| 852 | 57 | 2910 | 18/06/1944 | 1 | 2 | 43,40  | 1 | 14/06/2001 | 28/02/2002 | 12/10/2005 | 1 | 10,4 | 8 |   | 1 | 1 | 0 | 0,6 | 1 | 0 | 6 |
| 853 | 58 | 2910 | 18/06/1944 | 1 | 2 | 43,40  | 1 | 14/06/2001 | 28/02/2002 | 12/10/2005 | 1 | 10,4 | 8 |   | 1 | 1 | 0 | 0,6 | 1 | 0 | 6 |
| 854 | 59 | 2854 | 03/07/1945 | 1 | 2 | 15,27  | 1 | 30/03/2001 | 18/04/2002 | 26/07/2003 | 1 | 25   | 6 | 6 | 1 | 0 | 1 | 0,3 | 1 | 0 | 5 |
| 855 | 60 | 2854 | 03/07/1945 | 1 | 2 | 15,27  | 1 | 30/03/2001 | 18/04/2002 | 26/07/2003 | 1 | 25   | 6 | 6 | 1 | 0 | 1 | 0,3 | 1 | 0 | 5 |
| 856 | 61 | 1684 | 04/02/1934 | 1 | 1 | 80,53  | 1 | 24/09/1996 | 19/06/1997 | 05/03/2004 | 1 | 6,3  | 9 |   | 0 | 0 | 0 | 0,5 | 1 | 0 | 2 |
| 857 | 62 | 1684 | 04/02/1934 | 1 | 1 | 80,53  | 1 | 24/09/1996 | 19/06/1997 | 05/03/2004 | 1 | 6,3  | 9 |   | 0 | 0 | 0 | 0,5 | 1 | 0 | 2 |
| 858 | 63 | 3182 | 14/10/1933 | 1 | 1 | 10,57  | 1 | 20/03/2001 | 14/05/2002 | 01/04/2003 | 1 | 5,7  | 8 | 9 | 1 | 1 | 1 | 1,0 | 1 | 1 | 7 |
| 859 | 64 | 3182 | 14/10/1933 | 1 | 2 | 10,57  | 1 | 20/03/2001 | 14/05/2002 | 01/04/2003 | 1 | 5,7  | 8 | 9 | 1 | 1 | 1 | 1,0 | 1 | 1 | 7 |
| 860 | 65 | 2999 | 19/11/1940 | 1 | 2 | 41,27  | 1 | 25/10/2001 | 25/07/2002 | 03/01/2006 | 1 | 11,8 | 8 | 7 | 0 | 0 | 1 | 0,7 | 1 | 2 | 4 |
| 861 | 66 | 2999 | 19/11/1940 | 1 | 2 | 41,27  | 1 | 25/10/2001 | 25/07/2002 | 03/01/2006 | 1 | 11,8 | 8 | 7 | 0 | 0 | 1 | 0,7 | 1 | 2 | 4 |
| 862 | 67 | 2747 | 01/01/1943 | 1 | 3 | 78,27  | 1 | 05/12/2000 | 18/09/2001 | 26/03/2008 | 1 | 8,2  | 7 | 7 | 1 | 0 | 1 | 0,5 | 1 | 2 | 5 |
| 863 | 68 | 2747 | 01/01/1943 | 1 | 1 | 78,27  | 1 | 05/12/2000 | 18/09/2001 | 26/03/2008 | 1 | 8,2  | 7 | 7 | 1 | 0 | 1 | 0,5 | 1 | 2 | 5 |
| 864 | 69 | 1466 | 08/10/1941 | 1 | 3 | 88,23  | 0 |            | 05/10/1995 | 12/02/2003 | 0 |      |   | 5 | 0 | 0 | 0 |     | 1 | 0 | 2 |
| 865 | 70 | 1466 | 08/10/1941 | 1 | 2 | 88,23  | 0 |            | 05/10/1995 | 12/02/2003 | 0 |      |   | 5 | 0 | 0 | 0 |     | 1 | 0 | 2 |
| 866 | 71 | 2873 | 11/07/1943 | 1 | 2 | 124,30 | 0 | 19/04/2001 | 15/01/2002 | 24/05/2012 | 0 | 9    | 7 |   | 0 | 0 | 0 | 0,2 | 2 | 0 | 4 |
| 867 | 72 | 2873 | 11/07/1943 | 1 | x | 124,30 | 0 | 19/04/2001 | 15/01/2002 | 24/05/2012 | 0 | 9    | 7 |   | 0 | 0 | 0 | 0,2 | 2 | 0 | 4 |
| 868 | 73 | 2993 | 25/03/1939 | 1 | 3 | 28,93  | 1 | 26/09/2001 | 30/04/2002 | 28/09/2004 | 1 | 6,2  | 9 | 9 | 1 | 1 | 1 | 0,5 | 2 | 2 | 6 |
| 869 | 74 | 2993 | 25/03/1939 | 1 | 3 | 28,93  | 1 | 26/09/2001 | 30/04/2002 | 28/09/2004 | 1 | 6,2  | 9 | 9 | 1 | 1 | 1 | 0,5 | 2 | 2 | 6 |
| 870 | 75 | 2993 | 25/03/1939 | 1 | 3 | 28,93  | 1 | 26/09/2001 | 30/04/2002 | 28/09/2004 | 1 | 6,2  | 9 | 9 | 1 | 1 | 1 | 0,5 | 2 | 2 | 6 |
| 871 | 76 | 2993 | 25/03/1939 | 1 | 3 | 28,93  | 1 | 26/09/2001 | 30/04/2002 | 28/09/2004 | 1 | 6,2  | 9 | 9 | 1 | 1 | 1 | 0,5 | 2 | 2 | 6 |
| 872 | 77 | 3109 | 20/06/1936 | 1 | x | 53,83  | 0 | 14/02/2002 | 17/09/2002 | 12/03/2007 | 0 | 7,1  | 9 |   | 0 | 0 | 0 | 0,4 | 2 | 0 | 2 |
| 873 | 78 | 3109 | 20/06/1936 | 1 | x | 53,83  | 0 | 14/02/2002 | 17/09/2002 | 12/03/2007 | 0 | 7,1  | 9 |   | 0 | 0 | 0 | 0,4 | 2 | 0 | 2 |
| 874 | 79 | 3160 | 20/06/1949 | 1 | 1 | 11,00  | 1 | 18/04/2002 | 08/10/2002 | 08/09/2003 | 1 | 10,4 | 9 | 8 | 1 | 1 | 1 | 1,0 | 2 | 0 | 6 |
| 875 | 80 | 3160 | 20/06/1949 | 1 | 1 | 11,00  | 1 | 18/04/2002 | 08/10/2002 | 08/09/2003 | 1 | 10,4 | 9 | 8 | 1 | 1 | 1 | 1,0 | 2 | 0 | 6 |
| 876 | 81 | 2882 | 06/12/1940 | 1 | x | 75,60  | 1 | 07/11/2000 | 21/12/2001 | 09/04/2008 | 1 | 4,8  | 9 |   | 1 | 0 | 0 | 0,5 | 2 | 0 | 5 |
| 877 | 82 | 2882 | 06/12/1940 | 1 | x | 75,60  | 1 | 07/11/2000 | 21/12/2001 | 09/04/2008 | 1 | 4,8  | 9 |   | 1 | 0 | 0 | 0,5 | 2 | 0 | 5 |
| 878 | 83 | 3148 | 02/02/1942 | 1 | x | 144,77 | 0 | 09/04/2002 | 19/12/2002 | 12/01/2015 | 0 | 4,3  | 9 |   | 0 | 0 | 0 | 0,3 | 2 | 0 | 2 |
| 879 | 84 | 3148 | 02/02/1942 | 1 | x | 144,77 | 0 | 09/04/2002 | 19/12/2002 | 12/01/2015 | 0 | 4,3  | 9 |   | 0 | 0 | 0 | 0,3 | 2 | 0 | 2 |
| 880 | 85 | 3096 | 28/01/1948 | 1 | 1 | 69,03  | 1 | 17/01/2002 | 08/10/2002 | 09/07/2008 | 1 | 19,5 | 7 | 8 | 0 | 0 | 0 | 0,5 | 2 | 0 | 2 |
| 881 | 86 | 3096 | 28/01/1948 | 1 | 1 | 69,03  | 1 | 17/01/2002 | 08/10/2002 | 09/07/2008 | 1 | 19,5 | 7 | 8 | 0 | 0 | 0 | 0,5 | 2 | 0 | 2 |
| 882 | 87 | 3175 | 09/10/1941 | 1 | 0 | 148,40 | 0 | 08/05/2002 | 30/12/2002 | 12/05/2015 | 0 | 26,1 | 7 |   | 1 | 1 | 1 | 0,8 | 2 | 0 | 5 |
| 883 | 88 | 3175 | 09/10/1941 | 1 | 0 | 148,40 | 0 | 08/05/2002 | 30/12/2002 | 12/05/2015 | 0 | 26,1 | 7 |   | 1 | 1 | 1 | 0,8 | 2 | 0 | 5 |
| 884 | 89 | 3110 | 21/07/1943 | 1 | 1 | 60,93  | 0 | 15/02/2002 | 17/09/2002 | 15/10/2007 | 0 | 8    | 7 |   | 0 | 0 | 0 | 0,5 | 2 | 0 | 4 |
| 885 | 90 | 3110 | 21/07/1943 | 1 | 1 | 60,93  | 0 | 15/02/2002 | 17/09/2002 | 15/10/2007 | 0 | 8    | 7 |   | 0 | 0 | 0 | 0,5 | 2 | 0 | 4 |
| 886 | 91 | 5393 | 01/09/1937 | 1 | 1 | 117,30 | 0 | 23/01/2003 | 02/09/2003 | 11/06/2013 | 0 | 21   | 8 |   | 0 | 0 | 1 | 0,5 | 2 | 0 | 2 |
| 887 | 92 | 5393 | 01/09/1937 | 1 | 1 | 117,30 | 0 | 23/01/2003 | 02/09/2003 | 11/06/2013 | 0 | 21   | 8 |   | 0 | 0 | 1 | 0,5 | 2 | 0 | 2 |
| 888 | 93 | 5393 | 01/09/1937 | 1 | x | 117,30 | 0 | 23/01/2003 | 02/09/2003 | 11/06/2013 | 0 | 21   | 8 |   | 0 | 0 | 1 | 0,5 | 2 | 0 | 2 |
| 889 | 94 | 5393 | 01/09/1937 | 1 | x | 117,30 | 0 | 23/01/2003 | 02/09/2003 | 11/06/2013 | 0 | 21   | 8 |   | 0 | 0 | 1 | 0,5 | 2 | 0 | 2 |
| 890 | 95 | 5393 | 01/09/1937 | 1 | x | 117,30 | 0 | 23/01/2003 | 02/09/2003 | 11/06/2013 | 0 | 21   | 8 |   | 0 | 0 | 1 | 0,5 | 2 | 0 | 2 |
| 891 | 96 | 5393 | 01/09/1937 | 1 | x | 117,30 | 0 | 23/01/2003 | 02/09/2003 | 11/06/2013 | 0 | 21   | 8 |   | 0 | 0 | 1 | 0,5 | 2 | 0 | 2 |
| 892 | 97 | 5393 | 01/09/1937 | 1 | x | 117,30 | 0 | 23/01/2003 | 02/09/2003 | 11/06/2013 | 0 | 21   | 8 |   | 0 | 0 | 1 | 0,5 | 2 | 0 | 2 |
| 893 | 98 | 5393 | 01/09/1937 | 1 | x | 117,30 | 0 | 23/01/2003 | 02/09/2003 | 11/06/2013 | 0 | 21   | 8 |   | 0 | 0 | 1 | 0,5 | 2 | 0 | 2 |
| 894 | 99 | 3002 | 03/10/1945 | 1 | 1 | 102,37 | 0 | 03/10/2001 | 28/05/2002 | 09/12/2010 | 0 | 7,6  | 8 |   | 1 | 0 | 0 | 1,0 | 2 | 0 | 5 |



|     |     |      |            |   |   |        |   |            |            |            |   |     |   |   |   |   |     |     |   |   |   |
|-----|-----|------|------------|---|---|--------|---|------------|------------|------------|---|-----|---|---|---|---|-----|-----|---|---|---|
| 895 | 100 | 3002 | 03/10/1945 | 1 | 1 | 102.37 | 0 | 03/10/2001 | 28/05/2002 | 09/12/2010 | 0 | 7.6 | 8 | 1 | 0 | 0 | 1.0 | 2   | 0 | 5 |   |
| 896 | 101 | 3002 | 03/10/1945 | 1 | 1 | 102.37 | 0 | 03/10/2001 | 28/05/2002 | 09/12/2010 | 0 | 7.6 | 8 | 1 | 0 | 0 | 1.0 | 2   | 0 | 5 |   |
| 897 | 102 | 3002 | 03/10/1945 | 1 | 0 | 102.37 | 0 | 03/10/2001 | 28/05/2002 | 09/12/2010 | 0 | 7.6 | 8 | 1 | 0 | 0 | 1.0 | 2   | 0 | 5 |   |
| 898 | 103 | 3002 | 03/10/1945 | 1 | x | 102.37 | 0 | 03/10/2001 | 28/05/2002 | 09/12/2010 | 0 | 7.6 | 8 | 1 | 0 | 0 | 1.0 | 2   | 0 | 5 |   |
| 899 | 104 | 3002 | 03/10/1945 | 1 | 0 | 102.37 | 0 | 03/10/2001 | 28/05/2002 | 09/12/2010 | 0 | 7.6 | 8 | 1 | 0 | 0 | 1.0 | 2   | 0 | 5 |   |
| 900 | 105 | 3002 | 03/10/1945 | 1 | 1 | 102.37 | 0 | 03/10/2001 | 28/05/2002 | 09/12/2010 | 0 | 7.6 | 8 | 1 | 0 | 0 | 1.0 | 2   | 0 | 5 |   |
| 901 | 106 | 3002 | 03/10/1945 | 1 | x | 102.37 | 0 | 03/10/2001 | 28/05/2002 | 09/12/2010 | 0 | 7.6 | 8 | 1 | 0 | 0 | 1.0 | 2   | 0 | 5 |   |
| 902 | 107 | 3002 | 03/10/1945 | 1 | 0 | 102.37 | 0 | 03/10/2001 | 28/05/2002 | 09/12/2010 | 0 | 7.6 | 8 | 1 | 0 | 0 | 1.0 | 2   | 0 | 5 |   |
| 903 | 108 | 3002 | 03/10/1945 | 1 | 0 | 102.37 | 0 | 03/10/2001 | 28/05/2002 | 09/12/2010 | 0 | 7.6 | 8 | 1 | 0 | 0 | 1.0 | 2   | 0 | 5 |   |
| 904 | 109 | 3253 | 04/06/1937 | 1 | 2 |        | 1 | 06/05/2002 | 22/08/2002 |            | 1 | 8   | 6 | 7 | 1 | 0 | 1   | 0.1 | 2 | 0 | 5 |
| 905 | 110 | 3253 | 04/06/1937 | 1 | 2 |        | 1 | 06/05/2002 | 22/08/2002 |            | 1 | 8   | 6 | 7 | 1 | 0 | 1   | 0.1 | 2 | 0 | 5 |
| 906 | 111 | 3253 | 04/06/1937 | 1 | 1 |        | 1 | 06/05/2002 | 22/08/2002 |            | 1 | 8   | 6 | 7 | 1 | 0 | 1   | 0.1 | 2 | 0 | 5 |
| 907 | 112 | 3253 | 04/06/1937 | 1 | 1 |        | 1 | 06/05/2002 | 22/08/2002 |            | 1 | 8   | 6 | 7 | 1 | 0 | 1   | 0.1 | 2 | 0 | 5 |
| 908 | 113 | 3034 | 31/05/1940 | 1 | 2 | 40.00  | 1 | 13/11/2001 | 13/06/2002 | 13/10/2005 | 1 | 6.1 | 9 | 1 | 1 | 0 | 0.6 | 2   | 2 | 6 |   |
| 909 | 114 | 3034 | 31/05/1940 | 1 | 1 | 40.00  | 1 | 13/11/2001 | 13/06/2002 | 13/10/2005 | 1 | 6.1 | 9 | 1 | 1 | 0 | 0.6 | 2   | 2 | 6 |   |
| 910 | 115 | 3034 | 31/05/1940 | 1 | 0 | 40.00  | 1 | 13/11/2001 | 13/06/2002 | 13/10/2005 | 1 | 6.1 | 9 | 1 | 1 | 0 | 0.6 | 2   | 2 | 6 |   |
| 911 | 116 | 3034 | 31/05/1940 | 1 | 0 | 40.00  | 1 | 13/11/2001 | 13/06/2002 | 13/10/2005 | 1 | 6.1 | 9 | 1 | 1 | 0 | 0.6 | 2   | 2 | 6 |   |
| 912 | 117 | 3034 | 31/05/1940 | 1 | 1 | 40.00  | 1 | 13/11/2001 | 13/06/2002 | 13/10/2005 | 1 | 6.1 | 9 | 1 | 1 | 0 | 0.6 | 2   | 2 | 6 |   |
| 913 | 118 | 3034 | 31/05/1940 | 1 | x | 40.00  | 1 | 13/11/2001 | 13/06/2002 | 13/10/2005 | 1 | 6.1 | 9 | 1 | 1 | 0 | 0.6 | 2   | 2 | 6 |   |
| 914 | 119 | 3034 | 31/05/1940 | 1 | 2 | 40.00  | 1 | 13/11/2001 | 13/06/2002 | 13/10/2005 | 1 | 6.1 | 9 | 1 | 1 | 0 | 0.6 | 2   | 2 | 6 |   |
| 915 | 120 | 3034 | 31/05/1940 | 1 | 2 | 40.00  | 1 | 13/11/2001 | 13/06/2002 | 13/10/2005 | 1 | 6.1 | 9 | 1 | 1 | 0 | 0.6 | 2   | 2 | 6 |   |
| 916 | 121 | 3034 | 31/05/1940 | 1 | 2 | 40.00  | 1 | 13/11/2001 | 13/06/2002 | 13/10/2005 | 1 | 6.1 | 9 | 1 | 1 | 0 | 0.6 | 2   | 2 | 6 |   |
| 917 | 122 | 3034 | 31/05/1940 | 1 | 2 | 40.00  | 1 | 13/11/2001 | 13/06/2002 | 13/10/2005 | 1 | 6.1 | 9 | 1 | 1 | 0 | 0.6 | 2   | 2 | 6 |   |
| 918 | 123 | 3034 | 31/05/1940 | 1 | x | 40.00  | 1 | 13/11/2001 | 13/06/2002 | 13/10/2005 | 1 | 6.1 | 9 | 1 | 1 | 0 | 0.6 | 2   | 2 | 6 |   |
| 919 | 124 | 3034 | 31/05/1940 | 1 | x | 40.00  | 1 | 13/11/2001 | 13/06/2002 | 13/10/2005 | 1 | 6.1 | 9 | 1 | 1 | 0 | 0.6 | 2   | 2 | 6 |   |
| 920 | 125 | 3253 | 04/06/1937 | 1 | 1 |        | 1 | 06/05/2002 | 22/08/2002 |            | 1 | 8   | 6 | 7 | 1 | 0 | 1   | 0.1 | 2 | 0 | 5 |
| 921 | 126 | 3253 | 04/06/1937 | 1 | 1 |        | 1 | 06/05/2002 | 22/08/2002 |            | 1 | 8   | 6 | 7 | 1 | 0 | 1   | 0.1 | 2 | 0 | 5 |

**Table S3:**

**A. Specific partners of FKBP7 in RPE-1 cells**

| ID     | Gene symbol | Full Name                                                                        |
|--------|-------------|----------------------------------------------------------------------------------|
| Q2M2I8 | AAK1        | AP2 associated kinase 1                                                          |
| Q9BTE6 | AARSD1      | alanyl-tRNA synthetase domain containing 1                                       |
| Q8NE71 | ABCF1       | ATP-binding cassette, sub-family F (GCN20), member 1                             |
| Q9UG63 | ABCF2       | ATP-binding cassette, sub-family F (GCN20), member 2                             |
| Q8IZP0 | ABI1        | abl-interactor 1                                                                 |
| Q9NYB9 | ABI2        | abl-interactor 2                                                                 |
| P60709 | ACTB        | actin, beta                                                                      |
| P68032 | ACTC1       | actin, alpha, cardiac muscle 1                                                   |
| Q5TGY3 | AHDC1       | AT hook, DNA binding motif, containing 1                                         |
| Q09666 | AHNAK       | AHNAK nucleoprotein                                                              |
| Q6P6C2 | ALKBH5      | alkB homolog 5, RNA demethylase                                                  |
| Q86V81 | ALYREF      | Aly/REF export factor                                                            |
| Q9NQW6 | ANLN        | anillin actin binding protein                                                    |
| O14617 | AP3D1       | adaptor-related protein complex 3, delta 1 subunit                               |
| Q9Y2T2 | AP3M1       | adaptor-related protein complex 3, mu 1 subunit                                  |
| Q92572 | AP3S1       | adaptor-related protein complex 3, sigma 1 subunit                               |
| Q7Z5H3 | ARHGAP22    | Rho GTPase activating protein 22                                                 |
| Q92974 | ARHGEF2     | Rho/Rac guanine nucleotide exchange factor (GEF) 2                               |
| Q66PJ3 | ARL6IP4     | ADP-ribosylation factor-like 6 interacting protein 4                             |
| Q12797 | ASPH        | aspartate beta-hydroxylase                                                       |
| Q99700 | ATXN2       | ataxin 2                                                                         |
| Q8WWM7 | ATXN2L      | ataxin 2-like                                                                    |
| P11274 | BCR         | breakpoint cluster region                                                        |
| P20290 | BTF3        | basic transcription factor 3                                                     |
| P27708 | CAD         | carbamoyl-phosphate synthetase 2, aspartate transcarbamylase, and dihydroorotase |
| P62158 | CALM1       | calmodulin 1 (Phosphorylase Kinase, Delta)                                       |
| Q43852 | CALU        | calumenin                                                                        |
| Q13557 | CAMK2D      | calcium/calmodulin-dependent protein kinase II delta                             |
| Q08AD1 | CAMSAP2     | calmodulin regulated spectrin-associated protein family, member 2                |
| Q14444 | CAPRIN1     | cell cycle associated protein 1                                                  |
| Q96CT7 | CCDC124     | coiled-coil domain containing 124                                                |
| P78371 | CCT2        | chaperonin containing TCP1, subunit 2 (beta)                                     |
| P40227 | CCT6A       | chaperonin containing TCP1, subunit 6A (zeta 1)                                  |
| Q12834 | CDC20       | cell division cycle 20                                                           |
| Q9UPN4 | CEP131      | centrosomal protein 131kDa                                                       |
| Q5SW79 | CEP170      | centrosomal protein 170kDa                                                       |
| Q14011 | CIRBP       | cold inducible RNA binding protein                                               |
| O14578 | CIT         | citron rho-interacting serine/threonine kinase                                   |
| Q14008 | CKAP5       | cytoskeleton associated protein 5                                                |
| O75122 | CLASP2      | cytoplasmic linker associated protein 2                                          |
| A5YKK6 | CNOT1       | CCR4-NOT transcription complex, subunit 1                                        |
| Q8NBJ5 | COLGALT1    | collagen beta(1-O)galactosyltransferase 1                                        |
| P53621 | COPA        | coatamer protein complex, subunit alpha                                          |
| P35606 | COPB2       | coatamer protein complex, subunit beta 2 (beta prime)                            |
| Q9Y678 | COPG1       | coatamer protein complex, subunit gamma 1                                        |
| O75534 | CSDE1       | cold shock domain containing E1, RNA-binding                                     |
| P48729 | CSNK1A1     | casein kinase 1, alpha 1                                                         |
| P21291 | CSRP1       | cysteine and glycine-rich protein 1                                              |
| P35221 | CTNNA1      | catenin (cadherin-associated protein), alpha 1, 102kDa                           |
| O60716 | CTNND1      | catenin (cadherin-associated protein), delta 1                                   |
| Q14247 | CTTN        | cortactin                                                                        |
| Q53TN4 | CYBRD1      | cytochrome b reductase 1                                                         |
| Q92499 | DDX1        | DEAD (Asp-Glu-Ala-Asp) box helicase 1                                            |
| Q92841 | DDX17       | DEAD (Asp-Glu-Ala-Asp) box helicase 17                                           |
| Q9UHI6 | DDX20       | DEAD (Asp-Glu-Ala-Asp) box polypeptide 20                                        |
| O00571 | DDX3X       | DEAD (Asp-Glu-Ala-Asp) box helicase 3, X-linked                                  |
| Q9H0S4 | DDX47       | DEAD (Asp-Glu-Ala-Asp) box polypeptide 47                                        |
| P17844 | DDX5        | DEAD (Asp-Glu-Ala-Asp) box helicase 5                                            |
| Q8TDD1 | DDX54       | DEAD (Asp-Glu-Ala-Asp) box polypeptide 54                                        |
| Q9NSV4 | DIAPH3      | diaphanous-related formin 3                                                      |
| Q96N67 | DOCK7       | dedicator of cytokinesis 7                                                       |
| Q14126 | DSG2        | desmoglein 2                                                                     |
| P68104 | EEF1A1      | eukaryotic translation elongation factor 1 alpha 1                               |
| Q9NZN4 | EHD2        | EH-domain containing 2                                                           |
| Q9H223 | EHD4        | EH-domain containing 4                                                           |

|         |           |                                                                                                                                                                                           |
|---------|-----------|-------------------------------------------------------------------------------------------------------------------------------------------------------------------------------------------|
| P19525  | EIF2AK2   | eukaryotic translation initiation factor 2-alpha kinase 2                                                                                                                                 |
| P20042  | EIF2S2    | eukaryotic translation initiation factor 2, subunit 2 beta, 38kDa                                                                                                                         |
| Q9Y262  | EIF3L     | eukaryotic translation initiation factor 3, subunit L                                                                                                                                     |
| P60842  | EIF4A1    | eukaryotic translation initiation factor 4A1                                                                                                                                              |
| P23588  | EIF4B     | eukaryotic translation initiation factor 4B                                                                                                                                               |
| Q04637  | EIF4G1    | eukaryotic translation initiation factor 4 gamma, 1                                                                                                                                       |
| P78344  | EIF4G2    | eukaryotic translation initiation factor 4 gamma, 2                                                                                                                                       |
| O60841  | EIF5B     | eukaryotic translation initiation factor 5B                                                                                                                                               |
| Q8IUD2  | ERC1      | ELKS/RAB6-interacting/CAST family member 1                                                                                                                                                |
| P19447  | ERCC3     | excision repair cross-complementation group 3                                                                                                                                             |
| Q03468  | ERCC6     | excision repair cross-complementation group 6                                                                                                                                             |
| O00471  | EXOC5     | exocyst complex component 5                                                                                                                                                               |
| Q9Y2D4  | EXOC6B    | exocyst complex component 6B                                                                                                                                                              |
| Q9NZB2  | FAM120A   | family with sequence similarity 120A                                                                                                                                                      |
| Q9BUT9  | FAM195A   | family with sequence similarity 195, member A                                                                                                                                             |
| Q9H4H8  | FAM83D    | family with sequence similarity 83, member D                                                                                                                                              |
| Q9Y3D0  | FAM96B    | family with sequence similarity 96, member B                                                                                                                                              |
| P62861  | FAU       | Finkel-Biskis-Reilly murine sarcoma virus (FBR-MuSV) ubiquitously expressed                                                                                                               |
| Q5T1M5  | FKBP15    | FK506 binding protein 15, 133kDa                                                                                                                                                          |
| Q00688  | FKBP3     | FK506 binding protein 3, 25kDa                                                                                                                                                            |
| Q13045  | FLII      | flightless I actin binding protein                                                                                                                                                        |
| Q14315  | FLNC      | filamin C, gamma                                                                                                                                                                          |
| Q06787  | FMR1      | fragile X mental retardation 1                                                                                                                                                            |
| Q9P2Q2  | FRMD4A    | FERM domain containing 4A                                                                                                                                                                 |
| Q13283  | G3BP1     | GTPase activating protein (SH3 domain) binding protein 1<br>phosphoribosylglycinamide formyltransferase, phosphoribosylglycinamide synthetase,<br>phosphoribosylaminoimidazole synthetase |
| P22102  | GART      |                                                                                                                                                                                           |
| P48507  | GCLM      | glutamate-cysteine ligase, modifier subunit                                                                                                                                               |
| Q9NWXZ8 | GEMIN8    | gem (nuclear organelle) associated protein 8                                                                                                                                              |
| Q6Y7W6  | GIGYF2    | GRB10 interacting GYF protein 2                                                                                                                                                           |
| Q9Y2X7  | GIT1      | G protein-coupled receptor kinase interacting ArfGAP 1                                                                                                                                    |
| Q14161  | GIT2      | G protein-coupled receptor kinase interacting ArfGAP 2                                                                                                                                    |
| P15104  | GLUL      | glutamate-ammonia ligase                                                                                                                                                                  |
| P35269  | GTF2F1    | general transcription factor IIF, polypeptide 1, 74kDa                                                                                                                                    |
| Q9BZE4  | GTPBP4    | GTP binding protein 4                                                                                                                                                                     |
| Q7Z4H7  | HAUS6     | HAUS augmin-like complex, subunit 6                                                                                                                                                       |
| Q7Z4V5  | HDGFRP2   | hepatoma-derived growth factor-related protein 2                                                                                                                                          |
| Q9ULT8  | HECTD1    | HECT domain containing E3 ubiquitin protein ligase 1                                                                                                                                      |
| Q9BW71  | HIRIP3    | HIRA interacting protein 3                                                                                                                                                                |
| P16401  | HIST1H1B  | histone cluster 1, H1b                                                                                                                                                                    |
| P16402  | HIST1H1D  | histone cluster 1, H1d                                                                                                                                                                    |
| O60814  | HIST1H2BK | histone cluster 1, H2bk                                                                                                                                                                   |
| P23527  | HIST1H2BO | histone cluster 1, H2bo                                                                                                                                                                   |
| Q14527  | HLTF      | helicase-like transcription factor                                                                                                                                                        |
| Q13151  | HNRNPA0   | heterogeneous nuclear ribonucleoprotein A0                                                                                                                                                |
| P09651  | HNRNPA1   | heterogeneous nuclear ribonucleoprotein A1                                                                                                                                                |
| P22626  | HNRNPA2B1 | heterogeneous nuclear ribonucleoprotein A2/B1                                                                                                                                             |
| P51991  | HNRNPA3   | heterogeneous nuclear ribonucleoprotein A3                                                                                                                                                |
| P52272  | HNRNPM    | heterogeneous nuclear ribonucleoprotein M                                                                                                                                                 |
| Q00839  | HNRNPU    | heterogeneous nuclear ribonucleoprotein U (scaffold attachment factor A)                                                                                                                  |
| P11021  | HSPA5     | heat shock 70kDa protein 5 (glucose-regulated protein, 78kDa)                                                                                                                             |
| P04792  | HSPB1     | heat shock 27kDa protein 1                                                                                                                                                                |
| P10809  | HSPD1     | heat shock 60kDa protein 1 (chaperonin)                                                                                                                                                   |
| Q13418  | ILK       | integrin-linked kinase                                                                                                                                                                    |
| Q9P206  | KIAA1522  | KIAA1522                                                                                                                                                                                  |
| P52732  | KIF11     | kinesin family member 11                                                                                                                                                                  |
| Q02241  | KIF23     | kinesin family member 23                                                                                                                                                                  |
| O95239  | KIF4A     | kinesin family member 4A                                                                                                                                                                  |
| P05783  | KRT18     | keratin 18, type I                                                                                                                                                                        |
| P05787  | KRT8      | keratin 8, type II                                                                                                                                                                        |
| P35527  | KRT9      | keratin 9, type I                                                                                                                                                                         |
| Q6PKG0  | LARP1     | La ribonucleoprotein domain family, member 1                                                                                                                                              |
| Q14847  | LASP1     | LIM and SH3 protein 1                                                                                                                                                                     |
| Q9UPQ0  | LIMCH1    | LIM and calponin homology domains 1                                                                                                                                                       |
| Q9UGP4  | LIMD1     | LIM domains containing 1                                                                                                                                                                  |
| P02545  | LMNA      | lamin A/C                                                                                                                                                                                 |
| Q8WWI1  | LMO7      | LIM domain 7                                                                                                                                                                              |
| Q14693  | LPIN1     | lipin 1                                                                                                                                                                                   |
| Q93052  | LPP       | LIM domain containing preferred translocation partner in lipoma                                                                                                                           |
| Q9Y2L9  | LRCH1     | leucine-rich repeats and calponin homology (CH) domain containing 1                                                                                                                       |
| Q96AG4  | LRRC59    | leucine rich repeat containing 59                                                                                                                                                         |

|        |          |                                                                                                                                                                             |
|--------|----------|-----------------------------------------------------------------------------------------------------------------------------------------------------------------------------|
| Q86V48 | LUZP1    | leucine zipper protein 1                                                                                                                                                    |
| P46821 | MAP1B    | microtubule-associated protein 1B                                                                                                                                           |
| O43318 | MAP3K7   | mitogen-activated protein kinase kinase 7                                                                                                                                   |
| P27816 | MAP4     | microtubule-associated protein 4                                                                                                                                            |
| Q3KQU3 | MAP7D1   | MAP7 domain containing 1                                                                                                                                                    |
| Q8IWC1 | MAP7D3   | MAP7 domain containing 3                                                                                                                                                    |
| P33991 | MCM4     | minichromosome maintenance complex component 4                                                                                                                              |
| P33993 | MCM7     | minichromosome maintenance complex component 7                                                                                                                              |
| P46013 | MKI67    | marker of proliferation Ki-67                                                                                                                                               |
| Q6WCQ1 | MPRIP    | myosin phosphatase Rho interacting protein                                                                                                                                  |
| P49959 | MRE11A   | MRE11 homolog A, double strand break repair nuclease                                                                                                                        |
| Q6P1L8 | MRPL14   | mitochondrial ribosomal protein L14                                                                                                                                         |
| P52701 | MSH6     | mutS homolog 6                                                                                                                                                              |
| Q9Y4B5 | MTCL1    | microtubule crosslinking factor 1                                                                                                                                           |
| Q86UE4 | MTDH     | metadherin                                                                                                                                                                  |
| Q14764 | MVP      | major vault protein                                                                                                                                                         |
| Q9P2K5 | MYEF2    | myelin expression factor 2                                                                                                                                                  |
| P35580 | MYH10    | myosin, heavy chain 10, non-muscle                                                                                                                                          |
| P35579 | MYH9     | myosin, heavy chain 9, non-muscle                                                                                                                                           |
| P19105 | MYL12A   | myosin, light chain 12A, regulatory, non-sarcomeric                                                                                                                         |
| Q92614 | MYO18A   | myosin XVIII A                                                                                                                                                              |
| O00159 | MYO1C    | myosin IC                                                                                                                                                                   |
| Q12965 | MYO1E    | myosin IE                                                                                                                                                                   |
| Q6NZ67 | MZT2B    | mitotic spindle organizing protein 2B                                                                                                                                       |
| P55209 | NAP1L1   | nucleosome assembly protein 1-like 1                                                                                                                                        |
| Q8NEY1 | NAV1     | neuron navigator 1                                                                                                                                                          |
| O60934 | NBN      | nibrin                                                                                                                                                                      |
| Q15021 | NCAPD2   | non-SMC condensin I complex, subunit D2                                                                                                                                     |
| Q9BPX3 | NCAPG    | non-SMC condensin I complex, subunit G                                                                                                                                      |
| Q15003 | NCAPH    | non-SMC condensin I complex, subunit H                                                                                                                                      |
| Q9Y618 | NCOR2    | nuclear receptor corepressor 2                                                                                                                                              |
| Q9NXR1 | NDE1     | nudE neurodevelopment protein 1                                                                                                                                             |
| Q8NHV4 | NEDD1    | neural precursor cell expressed, developmentally down-regulated 1<br>neural precursor cell expressed, developmentally down-regulated 4-like, E3 ubiquitin<br>protein ligase |
| Q96PU5 | NEDD4L   | neural precursor cell expressed, developmentally down-regulated 4-like, E3 ubiquitin<br>protein ligase                                                                      |
| O00712 | NFIB     | nuclear factor I/B                                                                                                                                                          |
| P08651 | NFIC     | nuclear factor I/C (CCAAT-binding transcription factor)                                                                                                                     |
| Q9BPW8 | NIPSNAP1 | nipsnap homolog 1 (C. elegans)                                                                                                                                              |
| P30419 | NMT1     | N-myristoyltransferase 1                                                                                                                                                    |
| Q9ULX3 | NOB1     | NIN1/RPN12 binding protein 1 homolog                                                                                                                                        |
| Q15233 | NONO     | non-POU domain containing, octamer-binding                                                                                                                                  |
| P06748 | NPM1     | nucleophosmin (nucleolar phosphoprotein B23, numatrin)                                                                                                                      |
| O14786 | NRP1     | neuropilin 1                                                                                                                                                                |
| Q7Z417 | NUFIP2   | nuclear fragile X mental retardation protein interacting protein 2                                                                                                          |
| Q14980 | NUMA1    | nuclear mitotic apparatus protein 1                                                                                                                                         |
| Q9UQ80 | PA2G4    | proliferation-associated 2G4, 38kDa                                                                                                                                         |
| P11940 | PABPC1   | poly(A) binding protein, cytoplasmic 1                                                                                                                                      |
| O96013 | PAK4     | p21 protein (Cdc42/Rac)-activated kinase 4                                                                                                                                  |
| Q8WX93 | PALLD    | palladin, cytoskeletal associated protein                                                                                                                                   |
| O43252 | PAPSS1   | 3'-phosphoadenosine 5'-phosphosulfate synthase 1                                                                                                                            |
| O95340 | PAPSS2   | 3'-phosphoadenosine 5'-phosphosulfate synthase 2                                                                                                                            |
| P09874 | PARP1    | poly (ADP-ribose) polymerase 1                                                                                                                                              |
| Q96IZ0 | PAWR     | PRKC, apoptosis, WT1, regulator                                                                                                                                             |
| Q15154 | PCM1     | pericentriolar material 1                                                                                                                                                   |
| O00151 | PDLIM1   | PDZ and LIM domain 1                                                                                                                                                        |
| Q96HC4 | PDLIM5   | PDZ and LIM domain 5                                                                                                                                                        |
| Q9NR12 | PDLIM7   | PDZ and LIM domain 7 (enigma)                                                                                                                                               |
| Q9UHV9 | PFDN2    | prefoldin subunit 2                                                                                                                                                         |
| Q01813 | PFKP     | phosphofructokinase, platelet                                                                                                                                               |
| Q86UU1 | PHLDB1   | pleckstrin homology-like domain, family B, member 1                                                                                                                         |
| Q86SQ0 | PHLDB2   | pleckstrin homology-like domain, family B, member 2                                                                                                                         |
| Q9NWS0 | PIH1D1   | PIH1 domain containing 1                                                                                                                                                    |
| Q15149 | PLEC     | plectin                                                                                                                                                                     |
| Q8TCS8 | PNPT1    | polyribonucleotide nucleotidyltransferase 1                                                                                                                                 |
| P24928 | POLR2A   | polymerase (RNA) II (DNA directed) polypeptide A, 220kDa                                                                                                                    |
| Q99575 | POP1     | POP1 homolog, ribonuclease P/MRP subunit                                                                                                                                    |
| Q86W92 | PPFIBP1  | PTPRF interacting protein, binding protein 1 (liprin beta 1)                                                                                                                |
| O14974 | PPP1R12A | protein phosphatase 1, regulatory subunit 12A                                                                                                                               |
| Q9BZL4 | PPP1R12C | protein phosphatase 1, regulatory subunit 12C                                                                                                                               |
| O60828 | PQBP1    | polyglutamine binding protein 1                                                                                                                                             |
| P78527 | PRKDC    | protein kinase, DNA-activated, catalytic polypeptide                                                                                                                        |

|        |           |                                                        |
|--------|-----------|--------------------------------------------------------|
| P48634 | PRRC2A    | proline-rich coiled-coil 2A                            |
| Q5JSZ5 | PRRC2B    | proline-rich coiled-coil 2B                            |
| Q9Y520 | PRRC2C    | proline-rich coiled-coil 2C                            |
| Q9H357 | PTPN23    | protein tyrosine phosphatase, non-receptor type 23     |
| Q6NZI2 | PTRF      | polymerase I and transcript release factor             |
| Q96QR8 | PURB      | purine-rich element binding protein B                  |
| Q9BRP8 | PYM1      | PYM homolog 1, exon junction complex associated factor |
| Q9BXF6 | RAB11FIP5 | RAB11 family interacting protein 5 (class I)           |
| Q9H0H5 | RACGAP1   | Rac GTPase activating protein 1                        |
| Q9P0K7 | RAI14     | retinoic acid induced 14                               |
| Q9UJF2 | RASAL2    | RAS protein activator like 2                           |
| Q96PK6 | RBM14     | RNA binding motif protein 14                           |
| Q9P2N5 | RBM27     | RNA binding motif protein 27                           |
| Q96EV2 | RBM33     | RNA binding motif protein 33                           |
| Q9Y580 | RBM7      | RNA binding motif protein 7                            |
| P35250 | RFC2      | replication factor C (activator 1) 2, 40kDa            |
| Q6R327 | RICTOR    | RPTOR independent companion of MTOR, complex 2         |
| Q9Y508 | RNF114    | ring finger protein 114                                |
| P27635 | RPL10     | ribosomal protein L10                                  |
| P62906 | RPL10A    | ribosomal protein L10a                                 |
| P62913 | RPL11     | ribosomal protein L11                                  |
| P30050 | RPL12     | ribosomal protein L12                                  |
| P26373 | RPL13     | ribosomal protein L13                                  |
| P40429 | RPL13A    | ribosomal protein L13a                                 |
| P50914 | RPL14     | ribosomal protein L14                                  |
| P18621 | RPL17     | ribosomal protein L17                                  |
| Q07020 | RPL18     | ribosomal protein L18                                  |
| Q02543 | RPL18A    | ribosomal protein L18a                                 |
| P84098 | RPL19     | ribosomal protein L19                                  |
| P46778 | RPL21     | ribosomal protein L21                                  |
| P62829 | RPL23     | ribosomal protein L23                                  |
| P62750 | RPL23A    | ribosomal protein L23a                                 |
| P83731 | RPL24     | ribosomal protein L24                                  |
| P61254 | RPL26     | ribosomal protein L26                                  |
| Q9UNX3 | RPL26L1   | ribosomal protein L26-like 1                           |
| P46776 | RPL27A    | ribosomal protein L27a                                 |
| P46779 | RPL28     | ribosomal protein L28                                  |
| P47914 | RPL29     | ribosomal protein L29                                  |
| P39023 | RPL3      | ribosomal protein L3                                   |
| P62888 | RPL30     | ribosomal protein L30                                  |
| P62899 | RPL31     | ribosomal protein L31                                  |
| P62910 | RPL32     | ribosomal protein L32                                  |
| P49207 | RPL34     | ribosomal protein L34                                  |
| P42766 | RPL35     | ribosomal protein L35                                  |
| P18077 | RPL35A    | ribosomal protein L35a                                 |
| Q9Y3U8 | RPL36     | ribosomal protein L36                                  |
| P61927 | RPL37     | ribosomal protein L37                                  |
| P61513 | RPL37A    | ribosomal protein L37a                                 |
| P63173 | RPL38     | ribosomal protein L38                                  |
| P36578 | RPL4      | ribosomal protein L4                                   |
| P46777 | RPL5      | ribosomal protein L5                                   |
| Q02878 | RPL6      | ribosomal protein L6                                   |
| P18124 | RPL7      | ribosomal protein L7                                   |
| P62424 | RPL7A     | ribosomal protein L7a                                  |
| P62917 | RPL8      | ribosomal protein L8                                   |
| P32969 | RPL9      | ribosomal protein L9                                   |
| P05388 | RPLP0     | ribosomal protein, large, P0                           |
| P05386 | RPLP1     | ribosomal protein, large, P1                           |
| P46783 | RPS10     | ribosomal protein S10                                  |
| P62280 | RPS11     | ribosomal protein S11                                  |
| P62277 | RPS13     | ribosomal protein S13                                  |
| P62263 | RPS14     | ribosomal protein S14                                  |
| P62841 | RPS15     | ribosomal protein S15                                  |
| P62244 | RPS15A    | ribosomal protein S15a                                 |
| P62249 | RPS16     | ribosomal protein S16                                  |
| P0CW22 | RPS17     | ribosomal protein S17                                  |
| P62269 | RPS18     | ribosomal protein S18                                  |
| P39019 | RPS19     | ribosomal protein S19                                  |
| P15880 | RPS2      | ribosomal protein S2                                   |
| P60866 | RPS20     | ribosomal protein S20                                  |
| P63220 | RPS21     | ribosomal protein S21                                  |

|        |          |                                                                                                                                        |
|--------|----------|----------------------------------------------------------------------------------------------------------------------------------------|
| P62266 | RPS23    | ribosomal protein S23                                                                                                                  |
| P62851 | RPS25    | ribosomal protein S25                                                                                                                  |
| P62857 | RPS28    | ribosomal protein S28                                                                                                                  |
| P23396 | RPS3     | ribosomal protein S3                                                                                                                   |
| P61247 | RPS3A    | ribosomal protein S3A                                                                                                                  |
| P46782 | RPS5     | ribosomal protein S5                                                                                                                   |
| P62753 | RPS6     | ribosomal protein S6                                                                                                                   |
| P62081 | RPS7     | ribosomal protein S7                                                                                                                   |
| P62241 | RPS8     | ribosomal protein S8                                                                                                                   |
| P46781 | RPS9     | ribosomal protein S9                                                                                                                   |
| P08865 | RPSA     | ribosomal protein SA                                                                                                                   |
| Q9P2E9 | RRBP1    | ribosome binding protein 1                                                                                                             |
| Q9Y3I0 | RTCB     | RNA 2',3'-cyclic phosphate and 5'-OH ligase                                                                                            |
| Q9Y265 | RuvBL1   | RuvB-like AAA ATPase 1                                                                                                                 |
| Q9BY12 | SCAPER   | S-phase cyclin A-associated protein in the ER                                                                                          |
| Q9NVU7 | SDAD1    | SDA1 domain containing 1                                                                                                               |
| Q15019 | SEPT2    | septin 2                                                                                                                               |
| Q16181 | SEPT7    | septin 7                                                                                                                               |
| Q9UHD8 | SEPT9    | septin 9                                                                                                                               |
| Q8NC51 | SERBP1   | SERPINE1 mRNA binding protein 1<br>serpin peptidase inhibitor, clade H (heat shock protein 47), member 1, (collagen binding protein 1) |
| P50454 | SERPINH1 |                                                                                                                                        |
| P23246 | SFPQ     | splicing factor proline/glutamine-rich                                                                                                 |
| P34897 | SHMT2    | serine hydroxymethyltransferase 2 (mitochondrial)                                                                                      |
| Q8TF72 | SHROOM3  | shroom family member 3                                                                                                                 |
| Q9P270 | SLAIN2   | SLAIN motif family, member 2                                                                                                           |
| Q9UQE7 | SMC3     | structural maintenance of chromosomes 3                                                                                                |
| Q16637 | SMN1     | survival Of Motor Neuron 1, Telomeric                                                                                                  |
| Q7KZF4 | SND1     | staphylococcal nuclease and tudor domain containing 1                                                                                  |
| Q13573 | SNW1     | SNW domain containing 1                                                                                                                |
| O94964 | SOGA1    | suppressor of glucose, autophagy associated 1                                                                                          |
| Q69YQ0 | SPECC1L  | sperm antigen with calponin homology and coiled-coil domains 1-like                                                                    |
| Q9Y6N5 | SQRDL    | sulfide quinone reductase-like (yeast)                                                                                                 |
| Q7Z6B7 | SRGAP1   | SLIT-ROBO Rho GTPase activating protein 1                                                                                              |
| O75044 | SRGAP2   | SLIT-ROBO Rho GTPase activating protein 2                                                                                              |
| Q9UHB9 | SRP68    | signal recognition particle 68kDa                                                                                                      |
| Q08945 | SSRP1    | structure specific recognition protein 1                                                                                               |
| Q15056 | SYNJ2    | synaptojanin 2                                                                                                                         |
| Q9C0D5 | TANC1    | tetratricopeptide repeat, ankyrin repeat and coiled-coil containing 1                                                                  |
| Q13148 | TARDBP   | TAR DNA binding protein                                                                                                                |
| Q9BYX2 | TBC1D2   | TBC1 domain family, member 2                                                                                                           |
| O60343 | TBC1D4   | TBC1 domain family, member 4                                                                                                           |
| Q9UGI8 | TES      | testin LIM domain protein                                                                                                              |
| Q07157 | TJP1     | tight junction protein 1                                                                                                               |
| Q9UDY2 | TJP2     | tight junction protein 2                                                                                                               |
| P29401 | TKT      | transketolase                                                                                                                          |
| Q9C0C2 | TNKS1BP1 | tankyrase 1 binding protein 1, 182kDa                                                                                                  |
| Q68CZ2 | TNS3     | tensin 3                                                                                                                               |
| Q14545 | TRAFD1   | TRAF-type zinc finger domain containing 1                                                                                              |
| Q13263 | TRIM28   | tripartite motif containing 28                                                                                                         |
| O75962 | TRIO     | trio Rho guanine nucleotide exchange factor                                                                                            |
| Q9H2D6 | TRIOBP   | TRIO and F-actin binding protein                                                                                                       |
| Q15650 | TRIP4    | thyroid hormone receptor interactor 4                                                                                                  |
| Q15654 | TRIP6    | thyroid hormone receptor interactor 6                                                                                                  |
| P68363 | TUBA1B   | tubulin, alpha 1b                                                                                                                      |
| Q9BQE3 | TUBA1C   | tubulin, alpha 1c                                                                                                                      |
| P07437 | TUBB     | tubulin, beta class I                                                                                                                  |
| Q13885 | TUBB2A   | tubulin, beta 2A class IIa                                                                                                             |
| Q13509 | TUBB3    | tubulin, beta 3 class III                                                                                                              |
| P68371 | TUBB4B   | tubulin, beta 4B class IVb                                                                                                             |
| Q9BUF5 | TUBB6    | tubulin, beta 6 class V                                                                                                                |
| P49411 | TUFM     | Tu translation elongation factor, mitochondrial                                                                                        |
| Q9BZF9 | UACA     | uveal autoantigen with coiled-coil domains and ankyrin repeats                                                                         |
| Q14157 | UBAP2L   | ubiquitin associated protein 2-like                                                                                                    |
| Q96PU4 | UHRF2    | ubiquitin-like with PHD and ring finger domains 2, E3 ubiquitin protein ligase                                                         |
| Q92900 | UPF1     | UPF1 regulator of nonsense transcripts homolog (yeast)                                                                                 |
| Q9HAU5 | UPF2     | UPF2 regulator of nonsense transcripts homolog (yeast)                                                                                 |
| Q14694 | USP10    | ubiquitin specific peptidase 10                                                                                                        |
| P50552 | VASP     | vasodilator-stimulated phosphoprotein                                                                                                  |
| P08670 | VIM      | vimentin                                                                                                                               |
| Q9ULE0 | WWC3     | WWC family member 3                                                                                                                    |

|        |         |                                                    |
|--------|---------|----------------------------------------------------|
| O00308 | WWP2    | WW domain containing E3 ubiquitin protein ligase 2 |
| Q9H0D6 | XRN2    | 5'-3' exoribonuclease 2                            |
| P67809 | YBX1    | Y box binding protein 1                            |
| Q9UPT8 | ZC3H4   | zinc finger CCCH-type containing 4                 |
| Q8IWR0 | ZC3H7A  | zinc finger CCCH-type containing 7A                |
| Q7Z2W4 | ZC3HAV1 | zinc finger CCCH-type, antiviral 1                 |
| Q15942 | ZYX     | zyxin                                              |

### B. Specific partners of FKBP7 in IGR-CaP1-Dtx-R cells

| ID     | Gene symbol            | Full Name                                                                               |
|--------|------------------------|-----------------------------------------------------------------------------------------|
| P49588 | AARS                   | alanyl-tRNA synthetase                                                                  |
| Q5JTZ9 | AARS2                  | alanyl-tRNA synthetase 2, mitochondrial                                                 |
| P08183 | ABCB1                  | ATP-binding cassette, sub-family B (MDR/TAP), member 1                                  |
| P61221 | ABCE1                  | ATP-binding cassette, sub-family E (OABP), member 1                                     |
| Q8NE71 | ABCF1                  | ATP-binding cassette, sub-family F (GCN20), member 1                                    |
| Q9UG63 | ABCF2                  | ATP-binding cassette, sub-family F (GCN20), member 2                                    |
| Q9NUQ8 | ABCF3                  | ATP-binding cassette, sub-family F (GCN20), member 3                                    |
| Q8IZP0 | ABI1                   | abl-interactor 1                                                                        |
| P42684 | ABL2                   | ABL proto-oncogene 2, non-receptor tyrosine kinase                                      |
| Q13085 | ACACA                  | acetyl-CoA carboxylase alpha                                                            |
| P53396 | ACLY                   | ATP citrate lyase                                                                       |
| Q9Y305 | ACOT9                  | acyl-CoA thioesterase 9                                                                 |
| Q95573 | ACSL3                  | acyl-CoA synthetase long-chain family member 3                                          |
| P60709 | ACTB                   | actin, beta                                                                             |
| Q562R1 | ACTBL2                 | actin, beta-like 2                                                                      |
| P68032 | ACTC1                  | actin, alpha, cardiac muscle 1                                                          |
| P12814 | ACTN1                  | actinin, alpha 1                                                                        |
| O43707 | ACTN4                  | actinin, alpha 4                                                                        |
| P61160 | ACTR2                  | ARP2 actin-related protein 2 homolog (yeast)                                            |
| P61158 | ACTR3                  | ARP3 actin-related protein 3 homolog (yeast)                                            |
| Q9P2N4 | ADAMTS9                | ADAM metalloproteinase with thrombospondin type 1 motif, 9                              |
| Q9H2P0 | ADNP                   | activity-dependent neuroprotector homeobox                                              |
| Q09666 | AHNAK                  | AHNAK nucleoprotein                                                                     |
| Q9BQI0 | AIF1L                  | allograft inflammatory factor 1-like                                                    |
| Q12904 | AIMP1                  | aminoacyl tRNA synthetase complex-interacting multifunctional protein 1                 |
| Q13155 | AIMP2                  | aminoacyl tRNA synthetase complex-interacting multifunctional protein 2                 |
| Q9Y3D8 | AK6                    | adenylate kinase 6                                                                      |
| Q12802 | AKAP13                 | A kinase (PRKA) anchor protein 13                                                       |
| Q99996 | AKAP9                  | A kinase (PRKA) anchor protein 9                                                        |
| P54886 | ALDH18A1               | aldehyde dehydrogenase 18 family, member A1                                             |
| Q86V81 | ALYREF                 | Aly/REF export factor                                                                   |
| Q9Y303 | AMDHD2                 | amidohydrolase domain containing 2                                                      |
| Q01433 | AMPD2                  | adenosine monophosphate deaminase 2                                                     |
| P16157 | ANK1                   | ankyrin 1, erythrocytic                                                                 |
| Q01484 | ANK2                   | ankyrin 2, neuronal                                                                     |
| Q12955 | ANK3                   | ankyrin 3, node of Ranvier (ankyrin G)                                                  |
| Q9P2R3 | ANKFY1                 | ankyrin repeat and FYVE domain containing 1                                             |
| Q8IWZ3 | ANKHD1/ANKHD1-EIF4EBP3 | ankyrin repeat and KH domain containing 1                                               |
| Q9H8Y5 | ANKZF1                 | ankyrin repeat and zinc finger domain containing 1                                      |
| Q9NQW6 | ANLN                   | anillin actin binding protein                                                           |
| P07355 | ANXA2                  | annexin A2                                                                              |
| Q10567 | AP1B1                  | adaptor-related protein complex 1, beta 1 subunit                                       |
| Q43747 | AP1G1                  | adaptor-related protein complex 1, gamma 1 subunit                                      |
| Q95782 | AP2A1                  | adaptor-related protein complex 2, alpha 1 subunit                                      |
| Q94973 | AP2A2                  | adaptor-related protein complex 2, alpha 2 subunit                                      |
| P63010 | AP2B1                  | adaptor-related protein complex 2, beta 1 subunit                                       |
| Q96CW1 | AP2M1                  | adaptor-related protein complex 2, mu 1 subunit                                         |
| O00203 | AP3B1                  | adaptor-related protein complex 3, beta 1 subunit                                       |
| Q14617 | AP3D1                  | adaptor-related protein complex 3, delta 1 subunit                                      |
| Q9Y2T2 | AP3M1                  | adaptor-related protein complex 3, mu 1 subunit                                         |
| Q92572 | AP3S1                  | adaptor-related protein complex 3, sigma 1 subunit                                      |
| Q06481 | APLP2                  | amyloid beta (A4) precursor-like protein 2                                              |
| Q9HDC9 | APMAP                  | adipocyte plasma membrane associated protein                                            |
| Q8NEU8 | APPL2                  | adaptor protein, phosphotyrosine interaction, PH domain and leucine zipper containing 2 |
| O60306 | AQR                    | aquarius intron-binding spliceosomal factor                                             |
| P48444 | ARCN1                  | archain 1                                                                               |
| Q15013 | ARHGEF10               | Rho guanine nucleotide exchange factor (GEF) 10                                         |
| Q9NZN5 | ARHGEF12               | Rho guanine nucleotide exchange factor (GEF) 12                                         |
| Q96PE2 | ARHGEF17               | Rho guanine nucleotide exchange factor (GEF) 17                                         |

|         |           |                                                                                                      |
|---------|-----------|------------------------------------------------------------------------------------------------------|
| Q92974  | ARHGEF2   | Rho/Rac guanine nucleotide exchange factor (GEF) 2                                                   |
| Q8N1W1  | ARHGEF28  | Rho guanine nucleotide exchange factor (GEF) 28                                                      |
| Q14155  | ARHGEF7   | Rho guanine nucleotide exchange factor (GEF) 7                                                       |
| P40616  | ARL1      | ADP-ribosylation factor-like 1                                                                       |
| Q8IUUR7 | ARMC8     | armadillo repeat containing 8                                                                        |
| O15143  | ARPC1B    | actin related protein 2/3 complex, subunit 1B, 41kDa                                                 |
| O15144  | ARPC2     | actin related protein 2/3 complex, subunit 2, 34kDa                                                  |
| Q9ULH1  | ASAP1     | ArfGAP with SH3 domain, ankyrin repeat and PH domain 1                                               |
| Q8N9N2  | ASCC1     | activating signal cointegrator 1 complex subunit 1                                                   |
| Q9H118  | ASCC2     | activating signal cointegrator 1 complex subunit 2                                                   |
| Q8N3C0  | ASCC3     | activating signal cointegrator 1 complex subunit 3                                                   |
| P08243  | ASNS      | asparagine synthetase (glutamine-hydrolyzing)                                                        |
| Q12797  | ASPH      | aspartate beta-hydroxylase                                                                           |
| P16615  | ATP2A2    | ATPase, Ca <sup>++</sup> transporting, cardiac muscle, slow twitch 2                                 |
| P25705  | ATP5A1    | ATP synthase, H <sup>+</sup> transporting, mitochondrial F1 complex, alpha subunit 1, cardiac muscle |
| P46100  | ATRX      | alpha thalassemia/mental retardation syndrome X-linked                                               |
| Q99700  | ATXN2     | ataxin 2                                                                                             |
| Q8WWM7  | ATXN2L    | ataxin 2-like                                                                                        |
| Q13825  | AUH       | AU RNA binding protein/enoyl-CoA hydratase                                                           |
| O94766  | B3GAT3    | beta-1,3-glucuronyltransferase 3                                                                     |
| O95816  | BAG2      | BCL2-associated athanogene 2                                                                         |
| O95817  | BAG3      | BCL2-associated athanogene 3                                                                         |
| Q9UHR4  | BAIAP2L1  | BAI1-associated protein 2-like 1                                                                     |
| P11274  | BCR       | breakpoint cluster region                                                                            |
| Q9H694  | BICC1     | BicC family RNA binding protein 1                                                                    |
| Q9NR09  | BIRC6     | baculoviral IAP repeat containing 6                                                                  |
| Q9NSY1  | BMP2K     | BMP2 inducible kinase                                                                                |
| Q6PJG6  | BRAT1     | BRCA1-associated ATM activator 1                                                                     |
| Q10589  | BST2      | bone marrow stromal cell antigen 2                                                                   |
| O14981  | BTAF1     | BTAF1 RNA polymerase II, B-TFIID transcription factor-associated, 170kDa                             |
| P20290  | BTF3      | basic transcription factor 3                                                                         |
| Q9Y224  | C14orf166 | chromosome 14 open reading frame 166                                                                 |
| Q9BU76  | C1orf35   | chromosome 1 open reading frame 35                                                                   |
| Q9H6R7  | C2orf44   | chromosome 2 open reading frame 44                                                                   |
| Q8WWC4  | C2orf47   | chromosome 2 open reading frame 47                                                                   |
| Q9BRJ6  | C7orf50   | chromosome 7 open reading frame 50                                                                   |
| Q8WUQ7  | CACTIN    | cactin, spliceosome C complex subunit                                                                |
| P27708  | CAD       | carbamoyl-phosphate synthetase 2, aspartate transcarbamylase, and dihydroorotase                     |
| Q05682  | CALD1     | caldesmon 1                                                                                          |
| P62158  | CALM1     | calmodulin 1 (Phosphorylase Kinase, Delta)                                                           |
| O43852  | CALU      | calumenin                                                                                            |
| Q13557  | CAMK2D    | calcium/calmodulin-dependent protein kinase II delta                                                 |
| Q13555  | CAMK2G    | calcium/calmodulin-dependent protein kinase II gamma                                                 |
| Q14444  | CAPRIN1   | cell cycle associated protein 1                                                                      |
| P52907  | CAPZA1    | capping protein (actin filament) muscle Z-line, alpha 1                                              |
| P47756  | CAPZB     | capping protein (actin filament) muscle Z-line, beta                                                 |
| Q9HA77  | CARS2     | cysteinyI-tRNA synthetase 2, mitochondrial (putative)                                                |
| P04040  | CAT       | catalase                                                                                             |
| Q6P1N0  | CC2D1A    | coiled-coil and C2 domain containing 1A                                                              |
| Q96CT7  | CCDC124   | coiled-coil domain containing 124                                                                    |
| Q16204  | CCDC6     | coiled-coil domain containing 6                                                                      |
| Q3V6T2  | CCDC88A   | coiled-coil domain containing 88A                                                                    |
| Q43303  | CCP110    | centriolar coiled coil protein 110kDa                                                                |
| P78371  | CCT2      | chaperonin containing TCP1, subunit 2 (beta)                                                         |
| P49368  | CCT3      | chaperonin containing TCP1, subunit 3 (gamma)                                                        |
| P50991  | CCT4      | chaperonin containing TCP1, subunit 4 (delta)                                                        |
| P48643  | CCT5      | chaperonin containing TCP1, subunit 5 (epsilon)                                                      |
| P40227  | CCT6A     | chaperonin containing TCP1, subunit 6A (zeta 1)                                                      |
| Q99832  | CCT7      | chaperonin containing TCP1, subunit 7 (eta)                                                          |
| P50990  | CCT8      | chaperonin containing TCP1, subunit 8 (theta)                                                        |
| Q12834  | CDC20     | cell division cycle 20                                                                               |
| P60953  | CDC42     | cell division cycle 42                                                                               |
| Q5VT25  | CDC42BPA  | CDC42 binding protein kinase alpha (DMPK-like)                                                       |
| Q9Y5S2  | CDC42BPB  | CDC42 binding protein kinase beta (DMPK-like)                                                        |
| Q00587  | CDC42EP1  | CDC42 effector protein (Rho GTPase binding) 1                                                        |
| O14735  | CDIPT     | CDP-diacylglycerol--inositol 3-phosphatidyltransferase                                               |
| P06493  | CDK1      | cyclin-dependent kinase 1                                                                            |
| Q96SN8  | CDK5RAP2  | CDK5 regulatory subunit associated protein 2                                                         |
| Q9BXW7  | CECR5     | cat eye syndrome chromosome region, candidate 5                                                      |



|        |          |                                                                                        |
|--------|----------|----------------------------------------------------------------------------------------|
| Q9UPN4 | CEP131   | centrosomal protein 131kDa                                                             |
| Q66GS9 | CEP135   | centrosomal protein 135kDa                                                             |
| Q5SW79 | CEP170   | centrosomal protein 170kDa                                                             |
| Q9Y4F5 | CEP170B  | centrosomal protein 170B                                                               |
| Q5JTW2 | CEP78    | centrosomal protein 78kDa                                                              |
| Q6P2H3 | CEP85    | centrosomal protein 85kDa                                                              |
| Q8IW35 | CEP97    | centrosomal protein 97kDa                                                              |
| P41208 | CETN2    | centrin, EF-hand protein, 2                                                            |
| Q9NX63 | CHCHD3   | coiled-coil-helix-coiled-coil-helix domain containing 3                                |
| Q12873 | CHD3     | chromodomain helicase DNA binding protein 3                                            |
| Q14839 | CHD4     | chromodomain helicase DNA binding protein 4                                            |
| Q9NZZ3 | CHMP5    | charged multivesicular body protein 5                                                  |
| Q99653 | CHP1     | calcineurin-like EF-hand protein 1                                                     |
| Q9Y3Y2 | CHTOP    | chromatin target of PRMT1                                                              |
| Q14011 | CIRBP    | cold inducible RNA binding protein                                                     |
| O14578 | CIT      | citron rho-interacting serine/threonine kinase                                         |
| Q07065 | CKAP4    | cytoskeleton-associated protein 4                                                      |
| Q14008 | CKAP5    | cytoskeleton associated protein 5                                                      |
| P12532 | CKMT1A   | creatine Kinase, Mitochondrial 1A                                                      |
| Q7Z460 | CLASP1   | cytoplasmic linker associated protein 1                                                |
| O75122 | CLASP2   | cytoplasmic linker associated protein 2                                                |
| Q9H078 | CLPB     | ClpB homolog, mitochondrial AAA ATPase chaperonin                                      |
| O76031 | CLPX     | caseinolytic mitochondrial matrix peptidase chaperone subunit                          |
| Q00610 | CLTC     | clathrin, heavy chain (Hc)                                                             |
| Q8N1G2 | CMTR1    | cap methyltransferase 1                                                                |
| Q9P003 | CNIH4    | cornichon family AMPA receptor auxiliary protein 4                                     |
| A5YKK6 | CNOT1    | CCR4-NOT transcription complex, subunit 1                                              |
| Q9UKZ1 | CNOT11   | CCR4-NOT transcription complex, subunit 11                                             |
| Q9NZN8 | CNOT2    | CCR4-NOT transcription complex, subunit 2                                              |
| P09543 | CNP      | 2',3'-cyclic nucleotide 3' phosphodiesterase                                           |
| Q8NBJ5 | COLGALT1 | collagen beta(1-O)galactosyltransferase 1                                              |
| P53621 | COPA     | coatamer protein complex, subunit alpha                                                |
| P53618 | COPB1    | coatamer protein complex, subunit beta 1                                               |
| P35606 | COPB2    | coatamer protein complex, subunit beta 2 (beta prime)                                  |
| O14579 | COPE     | coatamer protein complex, subunit epsilon                                              |
| Q9Y678 | COPG1    | coatamer protein complex, subunit gamma 1                                              |
| Q9UBF2 | COPG2    | coatamer protein complex, subunit gamma 2                                              |
| Q9BR76 | CORO1B   | coronin, actin binding protein, 1B                                                     |
| Q16630 | CPSF6    | cleavage and polyadenylation specific factor 6, 68kDa                                  |
| P50416 | CPT1A    | carnitine palmitoyltransferase 1A (liver)                                              |
| P52943 | CRIP2    | cysteine-rich protein 2                                                                |
| O75534 | CSDE1    | cold shock domain containing E1, RNA-binding                                           |
| P55060 | CSE1L    | CSE1 chromosome segregation 1-like (yeast)                                             |
| P48729 | CSNK1A1  | casein kinase 1, alpha 1                                                               |
| P49674 | CSNK1E   | casein Kinase 1, Epsilon                                                               |
| P68400 | CSNK2A1  | casein kinase 2, alpha 1 polypeptide                                                   |
| P19784 | CSNK2A2  | casein kinase 2, alpha prime polypeptide                                               |
| P67870 | CSNK2B   | casein kinase 2, beta polypeptide                                                      |
| P21291 | CSRP1    | cysteine and glycine-rich protein 1                                                    |
| P35221 | CTNNA1   | catenin (cadherin-associated protein), alpha 1, 102kDa                                 |
| O60716 | CTNND1   | catenin (cadherin-associated protein), delta 1                                         |
| P17812 | CTPS1    | CTP synthase 1                                                                         |
| Q14247 | CTTN     | cortactin                                                                              |
| Q69YN2 | CWF19L1  | CWF19-like 1, cell cycle control (S. pombe)                                            |
| Q7L576 | CYFIP1   | cytoplasmic FMR1 interacting protein 1                                                 |
| Q96F07 | CYFIP2   | cytoplasmic FMR1 interacting protein 2                                                 |
| P53355 | DAPK1    | death-associated protein kinase 1                                                      |
| P14868 | DARS     | aspartyl-tRNA synthetase                                                               |
| Q6PI48 | DARS2    | aspartyl-tRNA synthetase 2, mitochondrial                                              |
| Q16643 | DBN1     | drebrin 1                                                                              |
| P11182 | DBT      | dihydroliipoamide branched chain transacylase E2                                       |
| Q5VU92 | DCAF12L1 | DDB1 and CUL4 associated factor 12-like 1                                              |
| Q13561 | DCTN2    | dynactin 2 (p50)                                                                       |
| Q9UJW0 | DCTN4    | dynactin 4 (p62)                                                                       |
| Q8IWE4 | DCUN1D3  | DCN1, defective in cullin neddylation 1, domain containing 3                           |
| P39656 | DDOST    | dolichyl-diphosphooligosaccharide--protein glycosyltransferase subunit (non-catalytic) |
| Q92499 | DDX1     | DEAD (Asp-Glu-Ala-Asp) box helicase 1                                                  |
| Q92841 | DDX17    | DEAD (Asp-Glu-Ala-Asp) box helicase 17                                                 |
| Q9NR30 | DDX21    | DEAD (Asp-Glu-Ala-Asp) box helicase 21                                                 |
| Q9GZR7 | DDX24    | DEAD (Asp-Glu-Ala-Asp) box helicase 24                                                 |

|        |         |                                                                                        |
|--------|---------|----------------------------------------------------------------------------------------|
| O00571 | DDX3X   | DEAD (Asp-Glu-Ala-Asp) box helicase 3, X-linked                                        |
| Q9UUV9 | DDX41   | DEAD (Asp-Glu-Ala-Asp) box polypeptide 41                                              |
| Q9H0S4 | DDX47   | DEAD (Asp-Glu-Ala-Asp) box polypeptide 47                                              |
| Q9Y6V7 | DDX49   | DEAD (Asp-Glu-Ala-Asp) box polypeptide 49                                              |
| P17844 | DDX5    | DEAD (Asp-Glu-Ala-Asp) box helicase 5                                                  |
| Q9Y2R4 | DDX52   | DEAD (Asp-Glu-Ala-Asp) box polypeptide 52                                              |
| Q8TDD1 | DDX54   | DEAD (Asp-Glu-Ala-Asp) box polypeptide 54                                              |
| Q8NHQ9 | DDX55   | DEAD (Asp-Glu-Ala-Asp) box polypeptide 55                                              |
| Q9NY93 | DDX56   | DEAD (Asp-Glu-Ala-Asp) box helicase 56                                                 |
| P26196 | DDX6    | DEAD (Asp-Glu-Ala-Asp) box helicase 6                                                  |
| Q16698 | DECR1   | 2,4-dienoyl CoA reductase 1, mitochondrial                                             |
| Q9H4E7 | DEF6    | DEF6 guanine nucleotide exchange factor                                                |
| Q15392 | DHCR24  | 24-dehydrocholesterol reductase                                                        |
| O43143 | DHX15   | DEAH (Asp-Glu-Ala-His) box helicase 15                                                 |
| Q60231 | DHX16   | DEAH (Asp-Glu-Ala-His) box polypeptide 16                                              |
| Q7Z478 | DHX29   | DEAH (Asp-Glu-Ala-His) box polypeptide 29                                              |
| Q7L2E3 | DHX30   | DEAH (Asp-Glu-Ala-His) box helicase 30                                                 |
| Q14147 | DHX34   | DEAH (Asp-Glu-Ala-His) box polypeptide 34                                              |
| Q9H2U1 | DHX36   | DEAH (Asp-Glu-Ala-His) box polypeptide 36                                              |
| Q8IY37 | DHX37   | DEAH (Asp-Glu-Ala-His) box polypeptide 37                                              |
| Q92620 | DHX38   | DEAH (Asp-Glu-Ala-His) box polypeptide 38                                              |
| Q8IX18 | DHX40   | DEAH (Asp-Glu-Ala-His) box polypeptide 40                                              |
| Q6P158 | DHX57   | DEAH (Asp-Glu-Ala-Asp/His) box polypeptide 57                                          |
| Q08211 | DHX9    | DEAH (Asp-Glu-Ala-His) box helicase 9                                                  |
| Q9Y2L1 | DIS3    | DIS3 homolog, exosome endoribonuclease and 3'-5' exoribonuclease                       |
| P36957 | DLST    | dihydroliipoamide S-succinyltransferase (E2 component of 2-oxo-glutarate complex)      |
| P31689 | DNAJA1  | DnaJ (Hsp40) homolog, subfamily A, member 1                                            |
| O60884 | DNAJA2  | DnaJ (Hsp40) homolog, subfamily A, member 2                                            |
| Q96EY1 | DNAJA3  | DnaJ (Hsp40) homolog, subfamily A, member 3                                            |
| Q9UBS4 | DNAJB11 | DnaJ (Hsp40) homolog, subfamily B, member 11                                           |
| Q8IXB1 | DNAJC10 | DnaJ (Hsp40) homolog, subfamily C, member 10                                           |
| P50570 | DNM2    | dynamain 2                                                                             |
| P26358 | DNMT1   | DNA (cytosine-5-)-methyltransferase 1                                                  |
| Q14185 | DOCK1   | dedicator of cytokinesis 1                                                             |
| Q96HP0 | DOCK6   | dedicator of cytokinesis 6                                                             |
| Q96N67 | DOCK7   | dedicator of cytokinesis 7                                                             |
| O60762 | DPM1    | dolichyl-phosphate mannosyltransferase polypeptide 1, catalytic subunit                |
| Q9Y295 | DRG1    | developmentally regulated GTP binding protein 1                                        |
| Q14126 | DSG2    | desmoglein 2                                                                           |
| P15924 | DSP     | desmoplakin                                                                            |
| Q14204 | DYNC1H1 | dynein, cytoplasmic 1, heavy chain 1                                                   |
| Q5JPH6 | EARS2   | glutamyl-tRNA synthetase 2, mitochondrial                                              |
| Q14213 | EBI3    | Epstein-Barr virus induced 3                                                           |
| Q6P2E9 | EDC4    | enhancer of mRNA decapping 4                                                           |
| P68104 | EEF1A1  | eukaryotic translation elongation factor 1 alpha 1                                     |
| P24534 | EEF1B2  | eukaryotic translation elongation factor 1 beta 2                                      |
| P29692 | EEF1D   | eukaryotic translation elongation factor 1 delta (guanine nucleotide exchange protein) |
| Q43324 | EEF1E1  | eukaryotic translation elongation factor 1 epsilon 1                                   |
| P26641 | EEF1G   | eukaryotic translation elongation factor 1 gamma                                       |
| P13639 | EEF2    | eukaryotic translation elongation factor 2                                             |
| Q9BUP0 | EFHD1   | EF-hand domain family, member D1                                                       |
| Q96C19 | EFHD2   | EF-hand domain family, member D2                                                       |
| Q15029 | EFTUD2  | elongation factor Tu GTP binding domain containing 2                                   |
| P00533 | EGFR    | epidermal growth factor receptor                                                       |
| Q9H223 | EHD4    | EH-domain containing 4                                                                 |
| Q9BY44 | EIF2A   | eukaryotic translation initiation factor 2A, 65kDa                                     |
| P19525 | EIF2AK2 | eukaryotic translation initiation factor 2-alpha kinase 2                              |
| Q9P2K8 | EIF2AK4 | eukaryotic translation initiation factor 2 alpha kinase 4                              |
| Q9UI10 | EIF2B4  | eukaryotic translation initiation factor 2B, subunit 4 delta, 67kDa                    |
| P05198 | EIF2S1  | eukaryotic translation initiation factor 2, subunit 1 alpha, 35kDa                     |
| P20042 | EIF2S2  | eukaryotic translation initiation factor 2, subunit 2 beta, 38kDa                      |
| P41091 | EIF2S3  | eukaryotic translation initiation factor 2, subunit 3 gamma, 52kDa                     |
| Q14152 | EIF3A   | eukaryotic translation initiation factor 3, subunit A                                  |
| Q99613 | EIF3C   | eukaryotic translation initiation factor 3, subunit C                                  |
| O15371 | EIF3D   | eukaryotic translation initiation factor 3, subunit D                                  |
| P60228 | EIF3E   | eukaryotic translation initiation factor 3, subunit E                                  |
| O00303 | EIF3F   | eukaryotic translation initiation factor 3, subunit F                                  |
| Q13347 | EIF3I   | eukaryotic translation initiation factor 3, subunit I                                  |
| Q9Y262 | EIF3L   | eukaryotic translation initiation factor 3, subunit L                                  |
| P60842 | EIF4A1  | eukaryotic translation initiation factor 4A1                                           |
| P38919 | EIF4A3  | eukaryotic translation initiation factor 4A3                                           |

|        |               |                                                                                         |
|--------|---------------|-----------------------------------------------------------------------------------------|
| O60573 | EIF4E2        | eukaryotic translation initiation factor 4E family member 2                             |
| Q04637 | EIF4G1        | eukaryotic translation initiation factor 4 gamma, 1                                     |
| P63241 | EIF5A         | eukaryotic translation initiation factor 5A                                             |
| O60841 | EIF5B         | eukaryotic translation initiation factor 5B                                             |
| Q9H9T3 | ELP3          | elongator acetyltransferase complex subunit 3                                           |
| Q8N766 | EMC1          | ER membrane protein complex subunit 1                                                   |
| Q9P0I2 | EMC3          | ER membrane protein complex subunit 3                                                   |
| P50402 | EMD           | emerin                                                                                  |
| Q92979 | EMG1          | EMG1 N1-specific pseudouridine methyltransferase                                        |
| Q8N8S7 | ENAH          | enabled homolog (Drosophila)                                                            |
| O43491 | EPB41L2       | erythrocyte membrane protein band 4.1-like 2                                            |
| P07814 | EPRS          | glutamyl-prolyl-tRNA synthetase                                                         |
| Q9UBC2 | EPS15L1       | epidermal growth factor receptor pathway substrate 15-like 1                            |
| P04626 | ERBB2         | erb-b2 receptor tyrosine kinase 2                                                       |
| Q8IUD2 | ERC1          | ELKS/RAB6-interacting/CAST family member 1                                              |
| Q8IV48 | ERI1          | exoribonuclease 1                                                                       |
| O75477 | ERLIN1        | ER lipid raft associated 1                                                              |
| O94905 | ERLIN2        | ER lipid raft associated 2                                                              |
| Q9H501 | ESF1          | ESF1 nucleolar pre-rRNA processing protein homolog                                      |
| A0FGR8 | ESYT2         | extended synaptotagmin-like protein 2                                                   |
| P62495 | ETF1          | eukaryotic translation termination factor 1                                             |
| Q01844 | EWSR1         | EWS RNA-binding protein 1                                                               |
| Q96A65 | EXOC4         | exocyst complex component 4                                                             |
| Q13868 | EXOSC2        | exosome component 2                                                                     |
| P15311 | EZR           | ezrin                                                                                   |
| Q9NZB2 | FAM120A       | family with sequence similarity 120A                                                    |
| Q641Q2 | FAM21A/FAM21C | family with sequence similarity 21, member C                                            |
| Q9H4H8 | FAM83D        | family with sequence similarity 83, member D                                            |
| Q6ZRV2 | FAM83H        | family with sequence similarity 83, member H                                            |
| Q658Y4 | FAM91A1       | family with sequence similarity 91, member A1                                           |
| Q9Y3D0 | FAM96B        | family with sequence similarity 96, member B                                            |
| Q8NCA5 | FAM98A        | family with sequence similarity 98, member A                                            |
| Q52LJ0 | FAM98B        | family with sequence similarity 98, member B                                            |
| Q9Y285 | FARSA         | phenylalanyl-tRNA synthetase, alpha subunit                                             |
| Q7L8L6 | FASTKD5       | FAST kinase domains 5                                                                   |
| P62861 | FAU           | Finkel-Biskis-Reilly murine sarcoma virus (FBR-MuSV) ubiquitously expressed             |
| P22087 | FBL           | fibrillarin                                                                             |
| P07332 | FES           | FES proto-oncogene, tyrosine kinase                                                     |
| Q96M96 | FGD4          | FYVE, RhoGEF and PH domain containing 4                                                 |
| Q13642 | FHL1          | four and a half LIM domains 1                                                           |
| Q00688 | FKBP3         | FK506 binding protein 3, 25kDa                                                          |
| Q9Y680 | FKBP7         | FK506 binding protein 7                                                                 |
| Q13045 | FLII          | flightless I actin binding protein                                                      |
| P21333 | FLNA          | filamin A, alpha                                                                        |
| O75369 | FLNB          | filamin B, beta                                                                         |
| Q14315 | FLNC          | filamin C, gamma                                                                        |
| Q96PY5 | FMNL2         | formin-like 2                                                                           |
| Q5TON5 | FNBP1L        | formin binding protein 1-like                                                           |
| Q14331 | FRG1          | FSHD region gene 1                                                                      |
| Q8IY81 | FTSJ3         | FtsJ homolog 3 (E. coli)                                                                |
| P35637 | FUS           | FUS RNA binding protein                                                                 |
| P51114 | FXR1          | fragile X mental retardation, autosomal homolog 1                                       |
| P51116 | FXR2          | fragile X mental retardation, autosomal homolog 2                                       |
| Q13283 | G3BP1         | GTPase activating protein (SH3 domain) binding protein 1                                |
| Q9UN86 | G3BP2         | GTPase activating protein (SH3 domain) binding protein 2                                |
| P04406 | GAPDH         | glyceraldehyde-3-phosphate dehydrogenase                                                |
| O75323 | GBAS          | glioblastoma amplified sequence                                                         |
| Q92616 | GCN1          | GCN1 eIF2 alpha kinase activator homolog                                                |
| O14893 | GEMIN2        | gem (nuclear organelle) associated protein 2                                            |
| P57678 | GEMIN4        | gem (nuclear organelle) associated protein 4                                            |
| Q8TEQ6 | GEMIN5        | gem (nuclear organelle) associated protein 5                                            |
| Q8WXD5 | GEMIN6        | gem (nuclear organelle) associated protein 6                                            |
| Q06210 | GFPT1         | glutamine--fructose-6-phosphate transaminase 1                                          |
| Q9NWU2 | GID8          | GID complex subunit 8                                                                   |
| Q6Y7W6 | GIGYF2        | GRB10 interacting GYF protein 2                                                         |
| O14908 | GIPC1         | GIPC PDZ domain containing family, member 1                                             |
| Q9Y2X7 | GIT1          | G protein-coupled receptor kinase interacting ArfGAP 1                                  |
| Q14161 | GIT2          | G protein-coupled receptor kinase interacting ArfGAP 2                                  |
| Q9H4G4 | GLIPR2        | GLI pathogenesis-related 2                                                              |
| P00367 | GLUD1         | glutamate dehydrogenase 1                                                               |
| P63096 | GNAI1         | guanine nucleotide binding protein (G protein), alpha inhibiting activity polypeptide 1 |

|        |           |                                                                                                                                                  |
|--------|-----------|--------------------------------------------------------------------------------------------------------------------------------------------------|
| P04899 | GNAI2     | guanine nucleotide binding protein (G protein), alpha inhibiting activity polypeptide 2                                                          |
| P08754 | GNAI3     | guanine nucleotide binding protein (G protein), alpha inhibiting activity polypeptide 3                                                          |
| P50148 | GNAQ      | guanine nucleotide binding protein (G protein), q polypeptide                                                                                    |
| P63092 | GNAS      | GNAS complex locus                                                                                                                               |
| P62879 | GNB2      | guanine nucleotide binding protein (G protein), beta polypeptide 2                                                                               |
| P63244 | GNB2L1    | guanine nucleotide binding protein (G protein), beta polypeptide 2-like 1                                                                        |
| Q9Y223 | GNE       | glucosamine (UDP-N-acetyl)-2-epimerase/N-acetylmannosamine kinase                                                                                |
| P50151 | GNG10     | guanine nucleotide binding protein (G protein), gamma 10                                                                                         |
| Q9UBI6 | GNG12     | guanine nucleotide binding protein (G protein), gamma 12                                                                                         |
| Q13823 | GNL2      | guanine nucleotide binding protein-like 2 (nucleolar)                                                                                            |
| P46926 | GNPDA1    | glucosamine-6-phosphate deaminase 1                                                                                                              |
| Q8TDQ7 | GNPDA2    | glucosamine-6-phosphate deaminase 2                                                                                                              |
| Q9HD26 | GOPC      | golgi-associated PDZ and coiled-coil motif containing                                                                                            |
| P35052 | GPC1      | glypican 1                                                                                                                                       |
| O75487 | GPC4      | glypican 4                                                                                                                                       |
| Q8NFJ5 | GPRC5A    | G protein-coupled receptor, class C, group 5, member A                                                                                           |
| Q14451 | GRB7      | growth factor receptor-bound protein 7                                                                                                           |
| Q12849 | GRSF1     | G-rich RNA sequence binding factor 1                                                                                                             |
| P06396 | GSN       | gelsolin                                                                                                                                         |
| P09211 | GSTP1     | glutathione S-transferase pi 1                                                                                                                   |
| Q92759 | GTF2H4    | general transcription factor IIH, polypeptide 4, 52kDa                                                                                           |
| P78347 | GTF2I     | general transcription factor Iii                                                                                                                 |
| Q9Y5Q9 | GTF3C3    | general transcription factor IIIC, polypeptide 3, 102kDa                                                                                         |
| Q9UBP9 | GULP1     | GULP, engulfment adaptor PTB domain containing 1                                                                                                 |
| P13807 | GYS1      | glycogen synthase 1 (muscle)                                                                                                                     |
| P07305 | H1FO      | H1 histone family, member 0                                                                                                                      |
| P16104 | H2AFX     | H2A histone family, member X<br>hydroxyacyl-CoA dehydrogenase/3-ketoacyl-CoA thiolase/enoyl-CoA hydratase (trifunctional protein), alpha subunit |
| P40939 | HADHA     |                                                                                                                                                  |
| Q68C26 | HAUS3     | HAUS augmin-like complex, subunit 3                                                                                                              |
| O94927 | HAUS5     | HAUS augmin-like complex, subunit 5                                                                                                              |
| Q7Z4H7 | HAUS6     | HAUS augmin-like complex, subunit 6                                                                                                              |
| Q99871 | HAUS7     | HAUS augmin-like complex, subunit 7                                                                                                              |
| Q9BT25 | HAUS8     | HAUS augmin-like complex, subunit 8                                                                                                              |
| Q13547 | HDAC1     | histone deacetylase 1                                                                                                                            |
| Q7Z4V5 | HDGFRP2   | hepatoma-derived growth factor-related protein 2                                                                                                 |
| Q00341 | HDLBP     | high density lipoprotein binding protein                                                                                                         |
| Q9NRZ9 | HELLS     | helicase, lymphoid-specific                                                                                                                      |
| P42694 | HELZ      | helicase with zinc finger                                                                                                                        |
| O95714 | HERC2     | HECT and RLD domain containing E3 ubiquitin protein ligase 2                                                                                     |
| O94992 | HEXIM1    | hexamethylene bis-acetamide inducible 1                                                                                                          |
| P16401 | HIST1H1B  | histone cluster 1, H1b                                                                                                                           |
| P16402 | HIST1H1D  | histone cluster 1, H1d                                                                                                                           |
| P04908 | HIST1H2AB | histone Cluster 1, H2ab                                                                                                                          |
| P58876 | HIST1H2BD | histone cluster 1, H2bd                                                                                                                          |
| P62805 | HIST1H4A  | histone Cluster 1, H4a                                                                                                                           |
| Q16777 | HIST2H2AC | histone cluster 2, H2ac                                                                                                                          |
| Q8N257 | HIST3H2BB | histone cluster 3, H2bb                                                                                                                          |
| P19367 | HK1       | hexokinase 1                                                                                                                                     |
| Q2TB90 | HKDC1     | hexokinase domain containing 1                                                                                                                   |
| Q14527 | HLTF      | helicase-like transcription factor                                                                                                               |
| O75330 | HMMR      | hyaluronan-mediated motility receptor (RHAMM)                                                                                                    |
| Q13151 | HNRNPA0   | heterogeneous nuclear ribonucleoprotein A0                                                                                                       |
| P09651 | HNRNPA1   | heterogeneous nuclear ribonucleoprotein A1                                                                                                       |
| P22626 | HNRNPA2B1 | heterogeneous nuclear ribonucleoprotein A2/B1                                                                                                    |
| Q99729 | HNRNPAB   | heterogeneous nuclear ribonucleoprotein A/B                                                                                                      |
| P07910 | HNRNPC    | heterogeneous nuclear ribonucleoprotein C (C1/C2)<br>heterogeneous nuclear ribonucleoprotein D (AU-rich element RNA binding protein 1, 37kDa)    |
| Q14103 | HNRNPD    |                                                                                                                                                  |
| P52597 | HNRNPF    | heterogeneous nuclear ribonucleoprotein F                                                                                                        |
| P31943 | HNRNPH1   | heterogeneous nuclear ribonucleoprotein H1 (H)                                                                                                   |
| P55795 | HNRNPH2   | heterogeneous nuclear ribonucleoprotein H2 (H')                                                                                                  |
| P31942 | HNRNPH3   | heterogeneous nuclear ribonucleoprotein H3 (2H9)                                                                                                 |
| P61978 | HNRNPK    | heterogeneous nuclear ribonucleoprotein K                                                                                                        |
| P14866 | HNRNPL    | heterogeneous nuclear ribonucleoprotein L                                                                                                        |
| Q8WVV9 | HNRNPLL   | heterogeneous nuclear ribonucleoprotein L-like                                                                                                   |
| P52272 | HNRNPM    | heterogeneous nuclear ribonucleoprotein M                                                                                                        |
| Q00839 | HNRNPU    | heterogeneous nuclear ribonucleoprotein U (scaffold attachment factor A)                                                                         |
| Q9BUJ2 | HNRNPUL1  | heterogeneous nuclear ribonucleoprotein U-like 1                                                                                                 |
| Q86VS8 | HOK3      | hook microtubule-tethering protein 3                                                                                                             |
| P51659 | HSD17B4   | hydroxysteroid (17-beta) dehydrogenase 4                                                                                                         |

|        |           |                                                                                                  |
|--------|-----------|--------------------------------------------------------------------------------------------------|
| P07900 | HSP90AA1  | heat shock protein 90kDa alpha (cytosolic), class A member 1                                     |
| P08238 | HSP90AB1  | heat shock protein 90kDa alpha (cytosolic), class B member 1                                     |
| Q58FF6 | HSP90AB4P | heat shock protein 90kDa alpha (cytosolic), class B member 4, pseudogene                         |
| P14625 | HSP90B1   | heat shock protein 90kDa beta (Grp94), member 1                                                  |
| P08107 | HSPA1A    | heat Shock 70kDa Protein 1A                                                                      |
| P34932 | HSPA4     | heat shock 70kDa protein 4                                                                       |
| P11021 | HSPA5     | heat shock 70kDa protein 5 (glucose-regulated protein, 78kDa)                                    |
| P11142 | HSPA8     | heat shock 70kDa protein 8                                                                       |
| P38646 | HSPA9     | heat shock 70kDa protein 9 (mortalin)                                                            |
| P04792 | HSPB1     | heat shock 27kDa protein 1                                                                       |
| P10809 | HSPD1     | heat shock 60kDa protein 1 (chaperonin)                                                          |
| P41252 | IARS      | isoleucyl-tRNA synthetase                                                                        |
| Q9NSE4 | IARS2     | isoleucyl-tRNA synthetase 2, mitochondrial                                                       |
| Q9HBG6 | IFT122    | intraflagellar transport 122                                                                     |
| Q9NZI8 | IGF2BP1   | insulin-like growth factor 2 mRNA binding protein 1                                              |
| Q9Y6M1 | IGF2BP2   | insulin-like growth factor 2 mRNA binding protein 2                                              |
| O00425 | IGF2BP3   | insulin-like growth factor 2 mRNA binding protein 3                                              |
| O95163 | IKBKAP    | inhibitor of kappa light polypeptide gene enhancer in B-cells, kinase complex-associated protein |
| Q12906 | ILF3      | interleukin enhancer binding factor 3, 90kDa                                                     |
| Q13418 | ILK       | integrin-linked kinase                                                                           |
| Q16891 | IMMT      | inner membrane protein, mitochondrial                                                            |
| P20839 | IMPDH1    | IMP (inosine 5'-monophosphate) dehydrogenase 1                                                   |
| P12268 | IMPDH2    | IMP (inosine 5'-monophosphate) dehydrogenase 2                                                   |
| Q14642 | INPP5A    | inositol polyphosphate-5-phosphatase A                                                           |
| O95373 | IPO7      | importin 7                                                                                       |
| Q96P70 | IPO9      | importin 9                                                                                       |
| P46940 | IQGAP1    | IQ motif containing GTPase activating protein 1                                                  |
| Q7Z5L9 | IRF2BP2   | interferon regulatory factor 2 binding protein 2                                                 |
| Q9NPH2 | ISYNA1    | inositol-3-phosphate synthase 1                                                                  |
| Q14573 | ITPR3     | inositol 1,4,5-trisphosphate receptor, type 3                                                    |
| P14923 | JUP       | junction plakoglobin                                                                             |
| Q63ZY3 | KANK2     | KN motif and ankyrin repeat domains 2                                                            |
| O60341 | KDM1A     | lysine (K)-specific demethylase 1A                                                               |
| Q07666 | KHDRBS1   | KH domain containing, RNA binding, signal transduction associated 1                              |
| Q12768 | KIAA0196  | KIAA0196                                                                                         |
| Q2M389 | KIAA1033  | KIAA1033                                                                                         |
| Q96Q89 | KIF20B    | kinesin family member 20B                                                                        |
| Q02241 | KIF23     | kinesin family member 23                                                                         |
| O00139 | KIF2A     | kinesin heavy chain member 2A                                                                    |
| Q99661 | KIF2C     | kinesin family member 2C                                                                         |
| O95239 | KIF4A     | kinesin family member 4A                                                                         |
| Q9BW19 | KIFC1     | kinesin family member C1                                                                         |
| Q9BVG8 | KIFC3     | kinesin family member C3                                                                         |
| Q1ED39 | KNOP1     | lysine-rich nucleolar protein 1                                                                  |
| P50748 | KNTC1     | kinetochore associated 1                                                                         |
| P52294 | KPNA1     | karyopherin alpha 1 (importin alpha 5)                                                           |
| P52292 | KPNA2     | karyopherin alpha 2 (RAG cohort 1, importin alpha 1)                                             |
| O15131 | KPNA5     | karyopherin alpha 5 (importin alpha 6)                                                           |
| P04264 | KRT1      | keratin 1, type II                                                                               |
| P13645 | KRT10     | keratin 10, type I                                                                               |
| P02533 | KRT14     | keratin 14, type I                                                                               |
| P08779 | KRT16     | keratin 16, type I                                                                               |
| P35908 | KRT2      | keratin 2, type II                                                                               |
| P13647 | KRT5      | keratin 5, type II                                                                               |
| P02538 | KRT6A     | keratin 6A, type II                                                                              |
| P04259 | KRT6B     | keratin 6B, type II                                                                              |
| Q01546 | KRT76     | keratin 76, type II                                                                              |
| P35527 | KRT9      | keratin 9, type I                                                                                |
| Q86UP2 | KTN1      | kinectin 1 (kinesin receptor)                                                                    |
| O00515 | LAD1      | ladinin 1                                                                                        |
| P11047 | LAMC1     | laminin, gamma 1 (formerly LAMB2)                                                                |
| P28838 | LAP3      | leucine aminopeptidase 3                                                                         |
| Q6PKG0 | LARP1     | La ribonucleoprotein domain family, member 1                                                     |
| Q71RC2 | LARP4     | La ribonucleoprotein domain family, member 4                                                     |
| Q92615 | LARP4B    | La ribonucleoprotein domain family, member 4B                                                    |
| Q4G0J3 | LARP7     | La ribonucleoprotein domain family, member 7                                                     |
| Q9P2J5 | LARS      | leucyl-tRNA synthetase                                                                           |
| Q15031 | LARS2     | leucyl-tRNA synthetase 2, mitochondrial                                                          |
| Q14847 | LASP1     | LIM and SH3 protein 1                                                                            |
| P00338 | LDHA      | lactate dehydrogenase A                                                                          |

|        |                    |                                                                                                                                          |
|--------|--------------------|------------------------------------------------------------------------------------------------------------------------------------------|
| P07195 | LDHB               | lactate dehydrogenase B                                                                                                                  |
| P09382 | LGALS1             | lectin, galactoside-binding, soluble, 1                                                                                                  |
| Q9UPQ0 | LIMCH1             | LIM and calponin homology domains 1                                                                                                      |
| P48059 | LIMS1              | LIM and senescent cell antigen-like domains 1                                                                                            |
| Q9H9Z2 | LIN28A             | lin-28 homolog A (C. elegans)                                                                                                            |
| Q9BRT6 | LLPH               | LLP homolog, long-term synaptic facilitation (Aplysia)                                                                                   |
| P02545 | LMNA               | lamin A/C                                                                                                                                |
| O43272 | LOC102724788/PRODH |                                                                                                                                          |
| P36776 | H                  | proline dehydrogenase (oxidase) 1                                                                                                        |
| Q93052 | LONP1              | lon peptidase 1, mitochondrial                                                                                                           |
| Q96II8 | LPP                | LIM domain containing preferred translocation partner in lipoma                                                                          |
| O75427 | LRCH3              | leucine-rich repeats and calponin homology (CH) domain containing 3                                                                      |
| P30533 | LRCH4              | leucine-rich repeats and calponin homology (CH) domain containing 4                                                                      |
| Q8N1G4 | LRPAP1             | low density lipoprotein receptor-related protein associated protein 1                                                                    |
| Q96AG4 | LRRC47             | leucine rich repeat containing 47                                                                                                        |
| Q32MZ4 | LRRC59             | leucine rich repeat containing 59                                                                                                        |
| Q9Y608 | LRRFIP1            | leucine rich repeat (in FLII) interacting protein 1                                                                                      |
| Q3MHD2 | LRRFIP2            | leucine rich repeat (in FLII) interacting protein 2                                                                                      |
| Q9NQ29 | LSM12              | LSM12 homolog                                                                                                                            |
| Q9Y383 | LUC7L              | LUC7-like                                                                                                                                |
| Q86V48 | LUC7L2             | LUC7-like 2 pre-mRNA splicing factor                                                                                                     |
| Q9NX58 | LUZP1              | leucine zipper protein 1                                                                                                                 |
| P07948 | LYAR               | Ly1 antibody reactive                                                                                                                    |
| Q7L5Y9 | LYN                | LYN proto-oncogene, Src family tyrosine kinase                                                                                           |
| Q9Y5V3 | MAEA               | macrophage erythroblast attacher                                                                                                         |
| Q9UNF1 | MAGED1             | melanoma antigen family D1                                                                                                               |
| Q9H0U3 | MAGED2             | melanoma antigen family D2                                                                                                               |
| Q66K74 | MAGT1              | magnesium transporter 1                                                                                                                  |
| P27816 | MAP1S              | microtubule-associated protein 1S                                                                                                        |
| O95819 | MAP4               | microtubule-associated protein 4                                                                                                         |
| Q3KQU3 | MAP4K4             | mitogen-activated protein kinase kinase kinase kinase 4                                                                                  |
| Q15555 | MAP7D1             | MAP7 domain containing 1                                                                                                                 |
| Q7KZ17 | MAPRE2             | microtubule-associated protein, RP/EB family, member 2                                                                                   |
| P27448 | MARK2              | MAP/microtubule affinity-regulating kinase 2                                                                                             |
| P56192 | MARK3              | MAP/microtubule affinity-regulating kinase 3                                                                                             |
| O60307 | MARS               | methionyl-tRNA synthetase                                                                                                                |
| P31153 | MAST3              | microtubule associated serine/threonine kinase 3                                                                                         |
| P43243 | MAT2A              | methionine adenosyltransferase II, alpha                                                                                                 |
| Q96RQ3 | MATR3              | matrin 3                                                                                                                                 |
| Q9HCC0 | MCCC1              | methylcrotonoyl-CoA carboxylase 1 (alpha)                                                                                                |
| P25205 | MCCC2              | methylcrotonoyl-CoA carboxylase 2 (beta)                                                                                                 |
| P33991 | MCM3               | minichromosome maintenance complex component 3                                                                                           |
| P33992 | MCM4               | minichromosome maintenance complex component 4                                                                                           |
| Q14566 | MCM5               | minichromosome maintenance complex component 5                                                                                           |
| P33993 | MCM6               | minichromosome maintenance complex component 6                                                                                           |
| Q14680 | MCM7               | minichromosome maintenance complex component 7                                                                                           |
| Q9Y316 | MELK               | maternal embryonic leucine zipper kinase                                                                                                 |
| Q8N6R0 | MEMO1              | mediator of cell motility 1                                                                                                              |
| Q7RTP6 | METTL13            | methyltransferase like 13                                                                                                                |
| Q8IUF8 | MICAL3             | microtubule associated monooxygenase, calponin and LIM domain containing 3                                                               |
| Q8N4C8 | MINA               | MYC induced nuclear antigen                                                                                                              |
| Q9NXC5 | MINK1              | misshapen-like kinase 1                                                                                                                  |
| P55196 | MIOS               | missing oocyte, meiosis regulator, homolog (Drosophila)                                                                                  |
| Q13724 | MLLT4              | myeloid/lymphoid or mixed-lineage leukemia; translocated to, 4                                                                           |
| Q9Y6X9 | MOGS               | mannosyl-oligosaccharide glucosidase                                                                                                     |
| Q9HCE1 | MORC2              | MORC family CW-type zinc finger 2                                                                                                        |
| Q6UVY6 | MOV10              | Mov10 RISC complex RNA helicase                                                                                                          |
| Q6WCQ1 | MOXD1              | monooxygenase, DBH-like 1                                                                                                                |
| Q9BV20 | MPRIIP             | myosin phosphatase Rho interacting protein                                                                                               |
| Q9Y2R9 | MR11               | methylthioribose-1-phosphate isomerase 1                                                                                                 |
| Q9UKD2 | MRPS7              | mitochondrial ribosomal protein S7                                                                                                       |
| P26038 | MRT04              | MRT4 homolog, ribosome maturation factor                                                                                                 |
| Q9Y4B5 | MSN                | moesin                                                                                                                                   |
| Q86UE4 | MTCL1              | microtubule crosslinking factor 1                                                                                                        |
| P11586 | MTDH               | metadherin                                                                                                                               |
| P13995 | MTHFD1             | methylenetetrahydrofolate dehydrogenase (NADP+ dependent) 1, methylenetetrahydrofolate cyclohydrolase, formyltetrahydrofolate synthetase |
| Q9NXD2 | MTHFD2             | methylenetetrahydrofolate dehydrogenase (NADP+ dependent) 2, methylenetetrahydrofolate cyclohydrolase                                    |
| Q14764 | MTMR10             | myotubularin related protein 10                                                                                                          |
| Q9BQG0 | MVP                | major vault protein                                                                                                                      |
|        | MYBBP1A            | MYB binding protein (P160) 1a                                                                                                            |

|        |          |                                                                                   |
|--------|----------|-----------------------------------------------------------------------------------|
| O75592 | MYCBP2   | MYC binding protein 2, E3 ubiquitin protein ligase                                |
| P35580 | MYH10    | myosin, heavy chain 10, non-muscle                                                |
| P35749 | MYH11    | myosin, heavy chain 11, smooth muscle                                             |
| Q7Z406 | MYH14    | myosin, heavy chain 14, non-muscle                                                |
| P35579 | MYH9     | myosin, heavy chain 9, non-muscle                                                 |
| P19105 | MYL12A   | myosin, light chain 12A, regulatory, non-sarcomeric                               |
| O14950 | MYL12B   | myosin, light chain 12B, regulatory                                               |
| P60660 | MYL6     | myosin, light chain 6, alkali, smooth muscle and non-muscle                       |
| P14649 | MYL6B    | myosin, light chain 6B, alkali, smooth muscle and non-muscle                      |
| P24844 | MYL9     | myosin, light chain 9, regulatory                                                 |
| Q92614 | MYO18A   | myosin XVIII A                                                                    |
| Q96H55 | MYO19    | myosin XIX                                                                        |
| O00159 | MYO1C    | myosin IC                                                                         |
| Q12965 | MYO1E    | myosin IE                                                                         |
| Q9Y411 | MYO5A    | myosin VA                                                                         |
| Q9ULV0 | MYO5B    | myosin VB                                                                         |
| Q9NQX4 | MYO5C    | myosin VC                                                                         |
| Q9UM54 | MYO6     | myosin VI                                                                         |
| Q13459 | MYO9B    | myosin IXB                                                                        |
| Q9NZM1 | MYOF     | myoferlin                                                                         |
| Q6NZ67 | MZT2B    | mitotic spindle organizing protein 2B                                             |
| Q13765 | NACA     | nascent polypeptide-associated complex alpha subunit                              |
| P43490 | NAMPT    | nicotinamide phosphoribosyltransferase                                            |
| Q99733 | NAP1L4   | nucleosome assembly protein 1-like 4                                              |
| O43776 | NARS     | asparaginyl-tRNA synthetase                                                       |
| Q15021 | NCAPD2   | non-SMC condensin I complex, subunit D2                                           |
| P42695 | NCAPD3   | non-SMC condensin II complex, subunit D3                                          |
| Q9BPX3 | NCAPG    | non-SMC condensin I complex, subunit G                                            |
| Q86X12 | NCAPG2   | non-SMC condensin II complex, subunit G2                                          |
| Q15003 | NCAPH    | non-SMC condensin I complex, subunit H                                            |
| Q9Y2A7 | NCKAP1   | NCK-associated protein 1                                                          |
| P19338 | NCL      | nucleolin                                                                         |
| Q969V3 | NCLN     | nicalin                                                                           |
| O75489 | NDUFS3   | NADH dehydrogenase (ubiquinone) Fe-S protein 3, 30kDa (NADH-coenzyme Q reductase) |
| P18615 | NELFE    | negative elongation factor complex member E                                       |
| O60524 | NEMF     | nuclear export mediator factor                                                    |
| P21359 | NF1      | neurofibromin 1                                                                   |
| Q9BYG3 | NIFK     | nucleolar protein interacting with the FHA domain of MK167                        |
| Q9BPW8 | NIPSNAP1 | nipsnap homolog 1 (C. elegans)                                                    |
| Q96D46 | NMD3     | NMD3 ribosome export adaptor                                                      |
| Q9Y5B8 | NME7     | NME/NM23 family member 7                                                          |
| P30419 | NMT1     | N-myristoyltransferase 1                                                          |
| Q8NC60 | NOA1     | nitric oxide associated 1                                                         |
| Q9ULX3 | NOB1     | NIN1/RPN12 binding protein 1 homolog                                              |
| Q15233 | NONO     | non-POU domain containing, octamer-binding                                        |
| P78316 | NOP14    | NOP14 nucleolar protein                                                           |
| P46087 | NOP2     | NOP2 nucleolar protein                                                            |
| O00567 | NOP56    | NOP56 ribonucleoprotein                                                           |
| Q9Y2X3 | NOP58    | NOP58 ribonucleoprotein                                                           |
| P06748 | NPM1     | nucleophosmin (nucleolar phosphoprotein B23, numatrin)                            |
| Q96P11 | NSUN5    | NOP2/Sun domain family, member 5                                                  |
| Q7Z417 | NUFIP2   | nuclear fragile X mental retardation protein interacting protein 2                |
| Q14980 | NUMA1    | nuclear mitotic apparatus protein 1                                               |
| Q9Y6R0 | NUMBL    | numb homolog (Drosophila)-like                                                    |
| P57740 | NUP107   | nucleoporin 107kDa                                                                |
| Q92621 | NUP205   | nucleoporin 205kDa                                                                |
| Q9UBU9 | NXF1     | nuclear RNA export factor 1                                                       |
| O60313 | OPA1     | optic atrophy 1 (autosomal dominant)                                              |
| O60890 | OPHN1    | oligophrenin 1                                                                    |
| O43929 | ORC4     | origin recognition complex, subunit 4                                             |
| Q9BZF1 | OSBPL8   | oxysterol binding protein-like 8                                                  |
| O15460 | P4HA2    | prolyl 4-hydroxylase, alpha polypeptide II                                        |
| P07237 | P4HB     | prolyl 4-hydroxylase, beta polypeptide                                            |
| Q9UQ80 | PA2G4    | proliferation-associated 2G4, 38kDa                                               |
| P11940 | PABPC1   | poly(A) binding protein, cytoplasmic 1                                            |
| Q13310 | PABPC4   | poly(A) binding protein, cytoplasmic 4 (inducible form)                           |
| Q9UNF0 | PACSN2   | protein kinase C and casein kinase substrate in neurons 2                         |
| Q9UKS6 | PACSN3   | protein kinase C and casein kinase substrate in neurons 3                         |
| O96013 | PAK4     | p21 protein (Cdc42/Rac)-activated kinase 4                                        |
| Q9NVE7 | PANK4    | pantothenate kinase 4                                                             |

|        |                 |                                                                                                                                             |
|--------|-----------------|---------------------------------------------------------------------------------------------------------------------------------------------|
| O43252 | PAPSS1          | 3'-phosphoadenosine 5'-phosphosulfate synthase 1                                                                                            |
| O95340 | PAPSS2          | 3'-phosphoadenosine 5'-phosphosulfate synthase 2                                                                                            |
| Q8TEW0 | PARD3           | par-3 family cell polarity regulator                                                                                                        |
| Q9BYG5 | PARD6B          | par-6 family cell polarity regulator beta                                                                                                   |
| P09874 | PARP1           | poly (ADP-ribose) polymerase 1                                                                                                              |
| Q9UGN5 | PARP2           | poly (ADP-ribose) polymerase 2                                                                                                              |
| Q9UKK3 | PARP4           | poly (ADP-ribose) polymerase family, member 4                                                                                               |
| Q7L3T8 | PARS2           | prolyl-tRNA synthetase 2, mitochondrial (putative)                                                                                          |
| Q86TB9 | PATL1           | protein associated with topoisomerase II homolog 1 (yeast)                                                                                  |
| Q96IZ0 | PAWR            | PRKC, apoptosis, WT1, regulator                                                                                                             |
| Q96AQ6 | PBXIP1          | pre-B-cell leukemia homeobox interacting protein 1                                                                                          |
| Q15365 | PCBP1           | poly(rC) binding protein 1                                                                                                                  |
| Q15366 | PCBP2           | poly(rC) binding protein 2                                                                                                                  |
| Q5JVF3 | PCID2           | PCI domain containing 2                                                                                                                     |
| Q16822 | PCK2            | phosphoenolpyruvate carboxykinase 2 (mitochondrial)                                                                                         |
| Q15154 | PCM1            | pericentriolar material 1                                                                                                                   |
| P12004 | PCNA            | proliferating cell nuclear antigen                                                                                                          |
| Q13442 | PDAP1           | PDGFA associated protein 1                                                                                                                  |
| Q5VU43 | PDE4DIP         | phosphodiesterase 4D interacting protein                                                                                                    |
| O00151 | PDLIM1          | PDZ and LIM domain 1                                                                                                                        |
| Q96HC4 | PDLIM5          | PDZ and LIM domain 5                                                                                                                        |
| Q9NUG6 | PDRG1           | p53 and DNA-damage regulated 1                                                                                                              |
| Q29RF7 | PDS5A           | PDS5 cohesin associated factor A                                                                                                            |
| Q9NTI5 | PDS5B           | PDS5 cohesin associated factor B                                                                                                            |
| Q86TG7 | PEG10           | paternally expressed 10                                                                                                                     |
| Q9BRX2 | PELO            | pelota homolog (Drosophila)                                                                                                                 |
| P50542 | PEX5            | peroxisomal biogenesis factor 5                                                                                                             |
| Q9UHV9 | PFDN2           | prefoldin subunit 2                                                                                                                         |
| P17858 | PFKL            | phosphofructokinase, liver                                                                                                                  |
| P08237 | PFKM            | phosphofructokinase, muscle                                                                                                                 |
| Q01813 | PFKP            | phosphofructokinase, platelet                                                                                                               |
| Q8IWS0 | PHF6            | PHD finger protein 6                                                                                                                        |
| O43175 | PHGDH           | phosphoglycerate dehydrogenase                                                                                                              |
| Q86UU1 | PHLDB1          | pleckstrin homology-like domain, family B, member 1                                                                                         |
| Q969N2 | PIGT            | phosphatidylinositol glycan anchor biosynthesis, class T                                                                                    |
| Q9NWS0 | PIH1D1          | PIH1 domain containing 1                                                                                                                    |
| Q99755 | PIP5K1A         | phosphatidylinositol-4-phosphate 5-kinase, type I, alpha                                                                                    |
| Q9Y446 | PKP3            | plakophilin 3                                                                                                                               |
| Q8IV08 | PLD3            | phospholipase D family, member 3                                                                                                            |
| Q15149 | PLEC            | plectin                                                                                                                                     |
| Q8IVE3 | PLEKHH2         | pleckstrin homology domain containing, family H (with MyTH4 domain) member 2                                                                |
| Q02809 | PLOD1           | procollagen-lysine, 2-oxoglutarate 5-dioxygenase 1                                                                                          |
| O60568 | PLOD3           | procollagen-lysine, 2-oxoglutarate 5-dioxygenase 3                                                                                          |
| P13797 | PLS3            | plastin 3                                                                                                                                   |
| Q9NRX1 | PNO1            | partner of NOB1 homolog                                                                                                                     |
| Q8IY17 | PNPLA6          | patatin-like phospholipase domain containing 6                                                                                              |
| Q8TCS8 | PNPT1           | polyribonucleotide nucleotidyltransferase 1                                                                                                 |
| P28340 | POLD1           | polymerase (DNA directed), delta 1, catalytic subunit                                                                                       |
| P24928 | POLR2A          | polymerase (RNA) II (DNA directed) polypeptide A, 220kDa                                                                                    |
| P30876 | POLR2B          | polymerase (RNA) II (DNA directed) polypeptide B, 140kDa                                                                                    |
| P36954 | POLR2I          | polymerase (RNA) II (DNA directed) polypeptide I, 14.5kDa                                                                                   |
| Q9GZM3 | POLR2J2/POLR2J3 | polymerase (RNA) II (DNA directed) polypeptide J3                                                                                           |
| O14802 | POLR3A          | polymerase (RNA) III (DNA directed) polypeptide A, 155kDa                                                                                   |
| Q99575 | POP1            | POP1 homolog, ribonuclease P/MRP subunit                                                                                                    |
| P0CG38 | POTE1           | POTE ankyrin domain family, member 1                                                                                                        |
| Q9NQ55 | PPAN            | peter pan homolog (Drosophila)<br>protein tyrosine phosphatase, receptor type, f polypeptide (PTPRF), interacting protein (liprin), alpha 1 |
| Q13136 | PPFIA1          | PTPRF interacting protein, binding protein 1 (liprin beta 1)                                                                                |
| Q86W92 | PPFIBP1         | PTPRF interacting protein, binding protein 2 (liprin beta 2)                                                                                |
| Q8ND30 | PPFIBP2         | PTPRF interacting protein, binding protein 2 (liprin beta 2)                                                                                |
| Q13356 | PPIL2           | peptidylprolyl isomerase (cyclophilin)-like 2                                                                                               |
| O60437 | PPL             | periplakin                                                                                                                                  |
| P62136 | PPP1CA          | protein phosphatase 1, catalytic subunit, alpha isozyme                                                                                     |
| P62140 | PPP1CB          | protein phosphatase 1, catalytic subunit, beta isozyme                                                                                      |
| P36873 | PPP1CC          | protein phosphatase 1, catalytic subunit, gamma isozyme                                                                                     |
| O14974 | PPP1R12A        | protein phosphatase 1, regulatory subunit 12A                                                                                               |
| Q9BZL4 | PPP1R12C        | protein phosphatase 1, regulatory subunit 12C                                                                                               |
| Q6NYC8 | PPP1R18         | protein phosphatase 1, regulatory subunit 18                                                                                                |
| P62714 | PPP2CB          | protein phosphatase 2, catalytic subunit, beta isozyme                                                                                      |
| Q06830 | PRDX1           | peroxiredoxin 1                                                                                                                             |
| Q9Y478 | PRKAB1          | protein kinase, AMP-activated, beta 1 non-catalytic subunit                                                                                 |



|        |           |                                                              |
|--------|-----------|--------------------------------------------------------------|
| P54619 | PRKAG1    | protein kinase, AMP-activated, gamma 1 non-catalytic subunit |
| P13861 | PRKAR2A   | protein kinase, cAMP-dependent, regulatory, type II, alpha   |
| Q05655 | PRKCD     | protein kinase C, delta                                      |
| Q9BZL6 | PRKD2     | protein kinase D2                                            |
| O94806 | PRKD3     | protein kinase D3                                            |
| P78527 | PRKDC     | protein kinase, DNA-activated, catalytic polypeptide         |
| O14744 | PRMT5     | protein arginine methyltransferase 5                         |
| O94906 | PRPF6     | pre-mRNA processing factor 6                                 |
| Q6P2Q9 | PRPF8     | pre-mRNA processing factor 8                                 |
| P60891 | PRPS1     | phosphoribosyl pyrophosphate synthetase 1                    |
| P11908 | PRPS2     | phosphoribosyl pyrophosphate synthetase 2                    |
| P48634 | PRRC2A    | proline-rich coiled-coil 2A                                  |
| P35998 | PSMC2     | proteasome 26S subunit, ATPase 2                             |
| P62195 | PSMC5     | proteasome 26S subunit, ATPase 5                             |
| Q13200 | PSMD2     | proteasome 26S subunit, non-ATPase 2                         |
| Q8WXF1 | PSPC1     | paraspeckle component 1                                      |
| P26599 | PTBP1     | polypyrimidine tract binding protein 1                       |
| Q15678 | PTPN14    | protein tyrosine phosphatase, non-receptor type 14           |
| Q6NZI2 | PTRF      | polymerase I and transcript release factor                   |
| Q15397 | PUM3      | pumilio RNA-binding family member 3                          |
| Q13610 | PWP1      | PWP1 homolog, endonuclein                                    |
| P49023 | PXN       | paxillin                                                     |
| P32322 | PYCR1     | pyrroline-5-carboxylate reductase 1                          |
| Q96C36 | PYCR2     | pyrroline-5-carboxylate reductase family, member 2           |
| P47897 | QARS      | glutamyl-tRNA synthetase                                     |
| P61026 | RAB10     | RAB10, member RAS oncogene family                            |
| Q9BXF6 | RAB11FIP5 | RAB11 family interacting protein 5 (class I)                 |
| P51153 | RAB13     | RAB13, member RAS oncogene family                            |
| Q15286 | RAB35     | RAB35, member RAS oncogene family                            |
| Q9H0H5 | RACGAP1   | Rac GTPase activating protein 1                              |
| O60216 | RAD21     | RAD21 cohesin complex component                              |
| Q92878 | RAD50     | RAD50 homolog, double strand break repair protein            |
| P04049 | RAF1      | Raf-1 proto-oncogene, serine/threonine kinase                |
| Q9POK7 | RAI14     | retinoic acid induced 14                                     |
| P11233 | RALA      | v-ral simian leukemia viral oncogene homolog A (ras related) |
| Q15311 | RALBP1    | ralA binding protein 1                                       |
| Q6GYQ0 | RALGAPA1  | Ral GTPase activating protein, alpha subunit 1 (catalytic)   |
| Q2PPJ7 | RALGAPA2  | Ral GTPase activating protein, alpha subunit 2 (catalytic)   |
| Q86X10 | RALGAPB   | Ral GTPase activating protein, beta subunit (non-catalytic)  |
| Q9UKM9 | RALY      | RALY heterogeneous nuclear ribonucleoprotein                 |
| P62826 | RAN       | RAN, member RAS oncogene family                              |
| Q6VN20 | RANBP10   | RAN binding protein 10                                       |
| P61224 | RAP1B     | RAP1B, member of RAS oncogene family                         |
| P54136 | RARS      | arginyl-tRNA synthetase                                      |
| Q96PK6 | RBM14     | RNA binding motif protein 14                                 |
| Q9NW64 | RBM22     | RNA binding motif protein 22                                 |
| Q9P2N5 | RBM27     | RNA binding motif protein 27                                 |
| Q9NW13 | RBM28     | RNA binding motif protein 28                                 |
| P98179 | RBM3      | RNA binding motif (RNP1, RRM) protein 3                      |
| Q14498 | RBM39     | RNA binding motif protein 39                                 |
| Q9BWF3 | RBM4      | RNA binding motif protein 4                                  |
| Q9Y580 | RBM7      | RNA binding motif protein 7                                  |
| Q15434 | RBMS2     | RNA binding motif, single stranded interacting protein 2     |
| P38159 | RBMX      | RNA binding motif protein, X-linked                          |
| Q93062 | RBPMS     | RNA binding protein with multiple splicing                   |
| P18754 | RCC1      | regulator of chromosome condensation 1                       |
| Q9P258 | RCC2      | regulator of chromosome condensation 2                       |
| Q15293 | RCN1      | reticulocalbin 1, EF-hand calcium binding domain             |
| Q14257 | RCN2      | reticulocalbin 2, EF-hand calcium binding domain             |
| P35241 | RDX       | radixin                                                      |
| P46063 | RECQL     | RecQ helicase-like                                           |
| Q9BWE0 | REPIN1    | replication initiator 1                                      |
| Q96D71 | REPS1     | RALBP1 associated Eps domain containing 1                    |
| P35251 | RFC1      | replication factor C (activator 1) 1, 145kDa                 |
| P35250 | RFC2      | replication factor C (activator 1) 2, 40kDa                  |
| P40938 | RFC3      | replication factor C (activator 1) 3, 38kDa                  |
| P35249 | RFC4      | replication factor C (activator 1) 4, 37kDa                  |
| P40937 | RFC5      | replication factor C (activator 1) 5, 36.5kDa                |
| Q14699 | RFTN1     | raftlin, lipid raft linker 1                                 |
| Q9NPQ8 | RIC8A     | RIC8 guanine nucleotide exchange factor A                    |
| Q06587 | RING1     | ring finger protein 1                                        |

|        |         |                                                         |
|--------|---------|---------------------------------------------------------|
| Q9BRS2 | RIOK1   | RIO kinase 1                                            |
| Q9BVS4 | RIOK2   | RIO kinase 2                                            |
| O43353 | RIPK2   | receptor-interacting serine-threonine kinase 2          |
| Q9H871 | RMND5A  | required for meiotic nuclear division 5 homolog A       |
| O15541 | RNF113A | ring finger protein 113A                                |
| Q5VTR2 | RNF20   | ring finger protein 20, E3 ubiquitin protein ligase     |
| Q63HN8 | RNF213  | ring finger protein 213                                 |
| O75150 | RNF40   | ring finger protein 40, E3 ubiquitin protein ligase     |
| Q15287 | RNPS1   | RNA binding protein S1, serine-rich domain              |
| Q13464 | ROCK1   | Rho-associated, coiled-coil containing protein kinase 1 |
| O75116 | ROCK2   | Rho-associated, coiled-coil containing protein kinase 2 |
| P27694 | RPA1    | replication protein A1, 70kDa                           |
| Q9H6T3 | RPAP3   | RNA polymerase II associated protein 3                  |
| P27635 | RPL10   | ribosomal protein L10                                   |
| P62906 | RPL10A  | ribosomal protein L10a                                  |
| P62913 | RPL11   | ribosomal protein L11                                   |
| P30050 | RPL12   | ribosomal protein L12                                   |
| P26373 | RPL13   | ribosomal protein L13                                   |
| P40429 | RPL13A  | ribosomal protein L13a                                  |
| P50914 | RPL14   | ribosomal protein L14                                   |
| P61313 | RPL15   | ribosomal protein L15                                   |
| P18621 | RPL17   | ribosomal protein L17                                   |
| Q07020 | RPL18   | ribosomal protein L18                                   |
| P84098 | RPL19   | ribosomal protein L19                                   |
| P46778 | RPL21   | ribosomal protein L21                                   |
| P35268 | RPL22   | ribosomal protein L22                                   |
| Q6P5R6 | RPL22L1 | ribosomal protein L22-like 1                            |
| P62829 | RPL23   | ribosomal protein L23                                   |
| P62750 | RPL23A  | ribosomal protein L23a                                  |
| P83731 | RPL24   | ribosomal protein L24                                   |
| P61254 | RPL26   | ribosomal protein L26                                   |
| Q9UNX3 | RPL26L1 | ribosomal protein L26-like 1                            |
| P61353 | RPL27   | ribosomal protein L27                                   |
| P46776 | RPL27A  | ribosomal protein L27a                                  |
| P46779 | RPL28   | ribosomal protein L28                                   |
| P47914 | RPL29   | ribosomal protein L29                                   |
| P39023 | RPL3    | ribosomal protein L3                                    |
| P62888 | RPL30   | ribosomal protein L30                                   |
| P62899 | RPL31   | ribosomal protein L31                                   |
| P62910 | RPL32   | ribosomal protein L32                                   |
| P49207 | RPL34   | ribosomal protein L34                                   |
| P42766 | RPL35   | ribosomal protein L35                                   |
| P18077 | RPL35A  | ribosomal protein L35a                                  |
| Q9Y3U8 | RPL36   | ribosomal protein L36                                   |
| P83881 | RPL36A  | ribosomal protein L36a                                  |
| Q969Q0 | RPL36AL | ribosomal protein L36a-like                             |
| P61513 | RPL37A  | ribosomal protein L37a                                  |
| P63173 | RPL38   | ribosomal protein L38                                   |
| P36578 | RPL4    | ribosomal protein L4                                    |
| P46777 | RPL5    | ribosomal protein L5                                    |
| Q02878 | RPL6    | ribosomal protein L6                                    |
| P18124 | RPL7    | ribosomal protein L7                                    |
| P62424 | RPL7A   | ribosomal protein L7a                                   |
| Q6DKI1 | RPL7L1  | ribosomal protein L7-like 1                             |
| P62917 | RPL8    | ribosomal protein L8                                    |
| P32969 | RPL9    | ribosomal protein L9                                    |
| P05388 | RPLP0   | ribosomal protein, large, P0                            |
| P05386 | RPLP1   | ribosomal protein, large, P1                            |
| P05387 | RPLP2   | ribosomal protein, large, P2                            |
| P04843 | RPN1    | ribophorin I                                            |
| P04844 | RPN2    | ribophorin II                                           |
| P46783 | RPS10   | ribosomal protein S10                                   |
| P62280 | RPS11   | ribosomal protein S11                                   |
| P62277 | RPS13   | ribosomal protein S13                                   |
| P62263 | RPS14   | ribosomal protein S14                                   |
| P62841 | RPS15   | ribosomal protein S15                                   |
| P62244 | RPS15A  | ribosomal protein S15a                                  |
| P62249 | RPS16   | ribosomal protein S16                                   |
| P0CW22 | RPS17   | ribosomal protein S17                                   |
| P62269 | RPS18   | ribosomal protein S18                                   |
| P39019 | RPS19   | ribosomal protein S19                                   |

|        |          |                                                                                                                                                                              |
|--------|----------|------------------------------------------------------------------------------------------------------------------------------------------------------------------------------|
| P15880 | RPS2     | ribosomal protein S2                                                                                                                                                         |
| P60866 | RPS20    | ribosomal protein S20                                                                                                                                                        |
| P63220 | RPS21    | ribosomal protein S21                                                                                                                                                        |
| P62266 | RPS23    | ribosomal protein S23                                                                                                                                                        |
| P62847 | RPS24    | ribosomal protein S24                                                                                                                                                        |
| P62851 | RPS25    | ribosomal protein S25                                                                                                                                                        |
| P62854 | RPS26    | ribosomal protein S26                                                                                                                                                        |
| P42677 | RPS27    | ribosomal protein S27                                                                                                                                                        |
| P62979 | RPS27A   | ribosomal protein S27a                                                                                                                                                       |
| P62857 | RPS28    | ribosomal protein S28                                                                                                                                                        |
| P62273 | RPS29    | ribosomal protein S29                                                                                                                                                        |
| P23396 | RPS3     | ribosomal protein S3                                                                                                                                                         |
| P61247 | RPS3A    | ribosomal protein S3A                                                                                                                                                        |
| P62701 | RPS4X    | ribosomal protein S4, X-linked                                                                                                                                               |
| P46782 | RPS5     | ribosomal protein S5                                                                                                                                                         |
| P62753 | RPS6     | ribosomal protein S6                                                                                                                                                         |
| Q15418 | RPS6KA1  | ribosomal protein S6 kinase, 90kDa, polypeptide 1                                                                                                                            |
| P51812 | RPS6KA3  | ribosomal protein S6 kinase, 90kDa, polypeptide 3                                                                                                                            |
| Q9UBS0 | RPS6KB2  | ribosomal protein S6 kinase, 70kDa, polypeptide 2                                                                                                                            |
| P62081 | RPS7     | ribosomal protein S7                                                                                                                                                         |
| P62241 | RPS8     | ribosomal protein S8                                                                                                                                                         |
| P46781 | RPS9     | ribosomal protein S9                                                                                                                                                         |
| P08865 | RPSA     | ribosomal protein SA                                                                                                                                                         |
| Q92600 | RQCD1    | RCD1 required for cell differentiation1 homolog (S. pombe)                                                                                                                   |
| P10301 | RRAS     | related RAS viral (r-ras) oncogene homolog                                                                                                                                   |
| P62070 | RRAS2    | related RAS viral (r-ras) oncogene homolog 2                                                                                                                                 |
| P56182 | RRP1     | ribosomal RNA processing 1                                                                                                                                                   |
| Q96EU6 | RRP36    | ribosomal RNA processing 36<br>ribosomal RNA processing 9, small subunit (SSU) processome component, homolog (yeast)                                                         |
| Q43818 | RRP9     | ribosomal RNA processing 9, small subunit (SSU) processome component, homolog (yeast)                                                                                        |
| Q15404 | RSU1     | Ras suppressor protein 1                                                                                                                                                     |
| Q9Y310 | RTCB     | RNA 2',3'-cyclic phosphate and 5'-OH ligase                                                                                                                                  |
| Q9BST9 | RTKN     | rhotekin                                                                                                                                                                     |
| Q9Y265 | RUVBL1   | RuvB-like AAA ATPase 1                                                                                                                                                       |
| Q9Y230 | RUVBL2   | RuvB-like AAA ATPase 2                                                                                                                                                       |
| P60903 | S100A10  | S100 calcium binding protein A10                                                                                                                                             |
| Q9NTJ5 | SACM1L   | SAC1 suppressor of actin mutations 1-like (yeast)                                                                                                                            |
| Q9Y3Z3 | SAMHD1   | SAM domain and HD domain 1                                                                                                                                                   |
| Q9Y6U3 | SCIN     | scinderin                                                                                                                                                                    |
| P34741 | SDC2     | syndecan 2                                                                                                                                                                   |
| Q9HCN8 | SDF2L1   | stromal cell-derived factor 2-like 1                                                                                                                                         |
| Q9BRK5 | SDF4     | stromal cell derived factor 4                                                                                                                                                |
| Q95810 | SDPR     | serum deprivation response                                                                                                                                                   |
| O15027 | SEC16A   | SEC16 homolog A, endoplasmic reticulum export factor                                                                                                                         |
| Q9P0V9 | SEPT10   | septin 10                                                                                                                                                                    |
| Q9NVA2 | SEPT11   | septin 11                                                                                                                                                                    |
| Q15019 | SEPT2    | septin 2                                                                                                                                                                     |
| Q16181 | SEPT7    | septin 7                                                                                                                                                                     |
| Q92599 | SEPT8    | septin 8                                                                                                                                                                     |
| Q9UHD8 | SEPT9    | septin 9                                                                                                                                                                     |
| Q8NC51 | SERBP1   | SERPINE1 mRNA binding protein 1<br>serpin peptidase inhibitor, clade H (heat shock protein 47), member 1, (collagen binding protein 1)                                       |
| P50454 | SERPINH1 | serpin peptidase inhibitor, clade H (heat shock protein 47), member 1, (collagen binding protein 1)                                                                          |
| O75533 | SF3B1    | splicing factor 3b, subunit 1, 155kDa                                                                                                                                        |
| Q13435 | SF3B2    | splicing factor 3b, subunit 2, 145kDa                                                                                                                                        |
| Q15427 | SF3B4    | splicing factor 3b, subunit 4, 49kDa                                                                                                                                         |
| P23246 | SFPQ     | splicing factor proline/glutamine-rich                                                                                                                                       |
| Q95470 | SGPL1    | sphingosine-1-phosphate lyase 1                                                                                                                                              |
| Q8TBC3 | SHKBP1   | SH3KBP1 binding protein 1                                                                                                                                                    |
| P34897 | SHMT2    | serine hydroxymethyltransferase 2 (mitochondrial)                                                                                                                            |
| Q8TF72 | SHROOM3  | shroom family member 3                                                                                                                                                       |
| Q96FS4 | SIPA1    | signal-induced proliferation-associated 1                                                                                                                                    |
| P42285 | SKIV2L2  | superkiller viralicidal activity 2-like 2 (S. cerevisiae)                                                                                                                    |
| Q00325 | SLC25A3  | solute carrier family 25 (mitochondrial carrier; phosphate carrier), member 3<br>solute carrier family 25 (mitochondrial carrier; adenine nucleotide translocator), member 5 |
| P05141 | SLC25A5  | solute carrier family 25 (mitochondrial carrier; adenine nucleotide translocator), member 5                                                                                  |
| Q5K4L6 | SLC27A3  | solute carrier family 27 (fatty acid transporter), member 3                                                                                                                  |
| Q9ULF5 | SLC39A10 | solute carrier family 39 (zinc transporter), member 10                                                                                                                       |
| Q01650 | SLC7A5   | solute carrier family 7 (amino acid transporter light chain, L system), member 5                                                                                             |
| P84022 | SMAD3    | SMAD family member 3                                                                                                                                                         |
| O60264 | SMARCA5  | SWI/SNF related, matrix associated, actin dependent regulator of chromatin, subfamily a, member 5                                                                            |

|        |          |                                                                             |
|--------|----------|-----------------------------------------------------------------------------|
| Q14683 | SMC1A    | structural maintenance of chromosomes 1A                                    |
| O95347 | SMC2     | structural maintenance of chromosomes 2                                     |
| Q9UQE7 | SMC3     | structural maintenance of chromosomes 3                                     |
| Q9NTJ3 | SMC4     | structural maintenance of chromosomes 4                                     |
| Q16637 | SMN1     | survival Of Motor Neuron 1                                                  |
| Q2TAY7 | SMU1     | smu-1 suppressor of mec-8 and unc-52 homolog (C. elegans)                   |
| O00161 | SNAP23   | synaptosomal-associated protein, 23kDa                                      |
| Q7KZF4 | SND1     | staphylococcal nuclease and tudor domain containing 1                       |
| O75643 | SNRNP200 | small nuclear ribonucleoprotein 200kDa (U5)                                 |
| P09661 | SNRPA1   | small nuclear ribonucleoprotein polypeptide A'                              |
| P62314 | SNRPD1   | small nuclear ribonucleoprotein D1 polypeptide 16kDa                        |
| P62306 | SNRPF    | small nuclear ribonucleoprotein polypeptide F                               |
| P55769 | SNU13    | SNU13 homolog, small nuclear ribonucleoprotein (U4/U6.U5)                   |
| Q9Y5X1 | SNX9     | sorting nexin 9                                                             |
| Q8NB90 | SPATA5   | spermatogenesis associated 5                                                |
| Q9BVQ7 | SPATA5L1 | spermatogenesis associated 5-like 1                                         |
| Q69YQ0 | SPECC1L  | sperm antigen with calponin homology and coiled-coil domains 1-like         |
| Q08AE8 | SPIRE1   | spire-type actin nucleation factor 1                                        |
| Q13813 | SPTAN1   | spectrin, alpha, non-erythrocytic 1                                         |
| Q01082 | SPTBN1   | spectrin, beta, non-erythrocytic 1                                          |
| O15020 | SPTBN2   | spectrin, beta, non-erythrocytic 2                                          |
| Q13501 | SQSTM1   | sequestosome 1                                                              |
| P12931 | SRC      | SRC proto-oncogene, non-receptor tyrosine kinase                            |
| Q7Z6B7 | SRGAP1   | SLIT-ROBO Rho GTPase activating protein 1                                   |
| O75044 | SRGAP2   | SLIT-ROBO Rho GTPase activating protein 2                                   |
| P37108 | SRP14    | signal recognition particle 14kDa (homologous Alu RNA binding protein)      |
| Q9UHB9 | SRP68    | signal recognition particle 68kDa                                           |
| O76094 | SRP72    | signal recognition particle 72kDa                                           |
| P49458 | SRP9     | signal recognition particle 9kDa                                            |
| Q96SB4 | SRPK1    | SRSF protein kinase 1                                                       |
| P78362 | SRPK2    | SRSF protein kinase 2                                                       |
| Q9Y5M8 | SRPRB    | signal recognition particle receptor, B subunit                             |
| Q07955 | SRSF1    | serine/arginine-rich splicing factor 1                                      |
| Q01130 | SRSF2    | serine/arginine-rich splicing factor 2                                      |
| Q08170 | SRSF4    | serine/arginine-rich splicing factor 4                                      |
| Q13243 | SRSF5    | serine/arginine-rich splicing factor 5                                      |
| Q16629 | SRSF7    | serine/arginine-rich splicing factor 7                                      |
| Q8WYL5 | SSH1     | slingshot protein phosphatase 1                                             |
| Q76176 | SSH2     | slingshot protein phosphatase 2                                             |
| Q08945 | SSRP1    | structure specific recognition protein 1                                    |
| P42224 | STAT1    | signal transducer and activator of transcription 1, 91kDa                   |
| O95793 | STAU1    | staufen double-stranded RNA binding protein 1                               |
| P31948 | STIP1    | stress-induced phosphoprotein 1                                             |
| Q8WXE9 | STON2    | stonin 2                                                                    |
| Q9Y3F4 | STRAP    | serine/threonine kinase receptor associated protein                         |
| O43815 | STRN     | striatin, calmodulin binding protein                                        |
| Q13033 | STRN3    | striatin, calmodulin binding protein 3                                      |
| Q9NRL3 | STRN4    | striatin, calmodulin binding protein 4                                      |
| P53999 | SUB1     | SUB1 homolog, transcriptional regulator                                     |
| Q9P2R7 | SUCLA2   | succinate-CoA ligase, ADP-forming, beta subunit                             |
| P53597 | SUCLG1   | succinate-CoA ligase, alpha subunit                                         |
| Q9Y5B9 | SUPT16H  | SPT16 homolog, facilitates chromatin remodeling subunit                     |
| Q15022 | SUZ12    | SUZ12 polycomb repressive complex 2 subunit                                 |
| O60506 | SYNCRIP  | synaptotagmin binding, cytoplasmic RNA interacting protein                  |
| Q96BW9 | TAMM41   | TAM41 mitochondrial translocator assembly and maintenance homolog           |
| Q9UL54 | TAOK2    | TAO kinase 2                                                                |
| Q9BW92 | TARS2    | threonyl-tRNA synthetase 2, mitochondrial (putative)                        |
| O60343 | TBC1D4   | TBC1 domain family, member 4                                                |
| Q9UHD2 | TBK1     | TANK-binding kinase 1                                                       |
| Q9Y4P3 | TBL2     | transducin (beta)-like 2                                                    |
| Q12788 | TBL3     | transducin (beta)-like 3                                                    |
| Q15369 | TCEB1    | transcription elongation factor B (SIII), polypeptide 1 (15kDa, elongin C)  |
| Q14241 | TCEB3    | transcription elongation factor B (SIII), polypeptide 3 (110kDa, elongin A) |
| Q9BQ70 | TCF25    | transcription factor 25 (basic helix-loop-helix)                            |
| Q13428 | TCOF1    | Treacher Collins-Franceschetti syndrome 1                                   |
| P17987 | TCP1     | t-complex 1                                                                 |
| Q9NZ01 | TECR     | trans-2,3-enoyl-CoA reductase                                               |
| P54274 | TERF1    | telomeric repeat binding factor (NIMA-interacting) 1                        |
| Q9UGI8 | TES      | testin LIM domain protein                                                   |
| Q9H5Q4 | TFB2M    | transcription factor B2, mitochondrial                                      |
| P49746 | THBS3    | thrombospondin 3                                                            |

|        |               |                                                                   |
|--------|---------------|-------------------------------------------------------------------|
| Q9Y2W1 | THRAP3        | thyroid hormone receptor associated protein 3                     |
| O43615 | TIMM44        | translocase of inner mitochondrial membrane 44 homolog (yeast)    |
| Q07157 | TJP1          | tight junction protein 1                                          |
| Q86UE8 | TLK2          | tousled-like kinase 2                                             |
| Q9BVC6 | TMEM109       | transmembrane protein 109                                         |
| Q9NYL9 | TMOD3         | tropomodulin 3 (ubiquitous)                                       |
| P42166 | TMPO          | thymopoietin                                                      |
| P42167 | TMPO          | thymopoietin                                                      |
| O95407 | TNFRSF6B      | tumor necrosis factor receptor superfamily, member 6b, decoy      |
| O95271 | TNKS          | tankyrase, TRF1-interacting ankyrin-related ADP-ribose polymerase |
| Q9C0C2 | TNKS1BP1      | tankyrase 1 binding protein 1, 182kDa                             |
| Q96GM8 | TOE1          | target of EGR1, member 1 (nuclear)                                |
| P11387 | TOP1          | topoisomerase (DNA) I                                             |
| P11388 | TOP2A         | topoisomerase (DNA) II alpha                                      |
| Q02880 | TOP2B         | topoisomerase (DNA) II beta                                       |
| Q5JTV8 | TOR1AIP1      | torsin A interacting protein 1                                    |
| P04637 | TP53          | tumor protein p53                                                 |
| P09493 | TPM1          | tropomyosin 1 (alpha)                                             |
| P06753 | TPM3          | tropomyosin 3                                                     |
| P67936 | TPM4          | tropomyosin 4                                                     |
| P29144 | TPP2          | tripeptidyl peptidase II                                          |
| Q12931 | TRAP1         | TNF receptor-associated protein 1                                 |
| Q96Q05 | TRAPPC9       | trafficking protein particle complex 9                            |
| P19474 | TRIM21        | tripartite motif containing 21                                    |
| Q14258 | TRIM25        | tripartite motif containing 25                                    |
| Q13263 | TRIM28        | tripartite motif containing 28                                    |
| Q9BRZ2 | TRIM56        | tripartite motif containing 56                                    |
| Q9C026 | TRIM9         | tripartite motif containing 9                                     |
| Q9H2D6 | TRIOBP        | TRIO and F-actin binding protein                                  |
| Q15650 | TRIP4         | thyroid hormone receptor interactor 4                             |
| Q9UI30 | TRMT112       | tRNA methyltransferase 11-2 homolog (S. cerevisiae)               |
| Q7Z2T5 | TRMT1L        | tRNA methyltransferase 1-like                                     |
| Q92574 | TSC1          | tuberous sclerosis 1                                              |
| P49815 | TSC2          | tuberous sclerosis 2                                              |
| Q2NL82 | TSR1          | TSR1, 20S rRNA accumulation, homolog (S. cerevisiae)              |
| Q96AY4 | TTC28         | tetratricopeptide repeat domain 28                                |
| Q71U36 | TUBA1A        | tubulin, alpha 1a                                                 |
| Q9BQE3 | TUBA1C        | tubulin, alpha 1c                                                 |
| P68366 | TUBA4A        | tubulin, alpha 4a                                                 |
| P07437 | TUBB          | tubulin, beta class I                                             |
| Q13885 | TUBB2A        | tubulin, beta 2A class IIa                                        |
| Q9BVA1 | TUBB2B        | tubulin, beta 2B class IIb                                        |
| Q13509 | TUBB3         | tubulin, beta 3 class III                                         |
| P04350 | TUBB4A        | tubulin, beta 4A class IVa                                        |
| P68371 | TUBB4B        | tubulin, beta 4B class IVb                                        |
| Q9BUF5 | TUBB6         | tubulin, beta 6 class V                                           |
| P23258 | TUBG1         | tubulin, gamma 1                                                  |
| Q9BSJ2 | TUBGCP2       | tubulin, gamma complex associated protein 2                       |
| Q96CW5 | TUBGCP3       | tubulin, gamma complex associated protein 3                       |
| Q9UGJ1 | TUBGCP4       | tubulin, gamma complex associated protein 4                       |
| Q96RT8 | TUBGCP5       | tubulin, gamma complex associated protein 5                       |
| Q96RT7 | TUBGCP6       | tubulin, gamma complex associated protein 6                       |
| P49411 | TUFM          | Tu translation elongation factor, mitochondrial                   |
| P40222 | TXLNA         | taxilin alpha                                                     |
| Q9NUQ3 | TXLNG         | taxilin gamma                                                     |
| Q01081 | U2AF1/U2AF1L5 | U2 small nuclear RNA auxiliary factor 1                           |
| O15042 | U2SURP        | U2 snRNP-associated SURP domain containing                        |
| Q14157 | UBAP2L        | ubiquitin associated protein 2-like                               |
| P17480 | UBTF          | upstream binding transcription factor, RNA polymerase I           |
| P22695 | UQCRC2        | ubiquinol-cytochrome c reductase core protein II                  |
| O94763 | URI1          | URI1, prefoldin-like chaperone                                    |
| Q14694 | USP10         | ubiquitin specific peptidase 10                                   |
| Q86UV5 | USP48         | ubiquitin specific peptidase 48                                   |
| P46939 | UTRN          | utrophin                                                          |
| P50552 | VASP          | vasodilator-stimulated phosphoprotein                             |
| P08670 | VIM           | vimentin                                                          |
| Q9H269 | VPS16         | vacuolar protein sorting 16 homolog (S. cerevisiae)               |
| Q9P253 | VPS18         | vacuolar protein sorting 18 homolog (S. cerevisiae)               |
| Q96AX1 | VPS33A        | vacuolar protein sorting 33 homolog A (S. cerevisiae)             |
| Q9H267 | VPS33B        | vacuolar protein sorting 33 homolog B (yeast)                     |
| Q9UN37 | VPS4A         | vacuolar protein sorting 4 homolog A (S. cerevisiae)              |

|        |         |                                                                                                                                         |
|--------|---------|-----------------------------------------------------------------------------------------------------------------------------------------|
| Q7Z5K2 | WAPL    | WAPL cohesin release factor                                                                                                             |
| Q9Y6W5 | WASF2   | WAS protein family, member 2                                                                                                            |
| C4AMC7 | WASH3P  | WAS protein family homolog 3 pseudogene                                                                                                 |
| Q9Y2W2 | WBP11   | WW domain binding protein 11                                                                                                            |
| O43709 | WBSCR22 | Williams Beuren syndrome chromosome region 22                                                                                           |
| O75717 | WDHD1   | WD repeat and HMG-box DNA binding protein 1                                                                                             |
| Q9BZH6 | WDR11   | WD repeat domain 11                                                                                                                     |
| Q6PJI9 | WDR59   | WD repeat domain 59                                                                                                                     |
| Q9GZS3 | WDR61   | WD repeat domain 61                                                                                                                     |
| O43379 | WDR62   | WD repeat domain 62                                                                                                                     |
| Q14191 | WRN     | Werner syndrome, RecQ helicase-like                                                                                                     |
| Q8IX03 | WWC1    | WW and C2 domain containing 1<br>X-ray repair complementing defective repair in Chinese hamster cells 5 (double-strand-break rejoining) |
| P13010 | XRCC5   | X-ray repair complementing defective repair in Chinese hamster cells 6                                                                  |
| P12956 | XRCC6   | X-ray repair complementing defective repair in Chinese hamster cells 6                                                                  |
| Q8IZH2 | XRN1    | 5'-3' exoribonuclease 1                                                                                                                 |
| Q9Y2Z4 | YARS2   | tyrosyl-tRNA synthetase 2, mitochondrial                                                                                                |
| P67809 | YBX1    | Y box binding protein 1                                                                                                                 |
| P07947 | YES1    | YES proto-oncogene 1, Src family tyrosine kinase                                                                                        |
| P62699 | YPEL5   | yippee-like 5                                                                                                                           |
| Q9H6S0 | YTHDC2  | YTH domain containing 2                                                                                                                 |
| P31946 | YWHAB   | tyrosine 3-monooxygenase/tryptophan 5-monooxygenase activation protein, beta                                                            |
| P61981 | YWHAG   | tyrosine 3-monooxygenase/tryptophan 5-monooxygenase activation protein, gamma                                                           |
| Q04917 | YWHAH   | tyrosine 3-monooxygenase/tryptophan 5-monooxygenase activation protein, eta                                                             |
| P27348 | YWHAQ   | tyrosine 3-monooxygenase/tryptophan 5-monooxygenase activation protein, theta                                                           |
| P63104 | YWHAZ   | tyrosine 3-monooxygenase/tryptophan 5-monooxygenase activation protein, zeta                                                            |
| Q96DT7 | ZBTB10  | zinc finger and BTB domain containing 10                                                                                                |
| Q9ULJ3 | ZBTB21  | zinc finger and BTB domain containing 21                                                                                                |
| Q96GY0 | ZC2HC1A | zinc finger, C2HC-type containing 1A                                                                                                    |
| Q8WU90 | ZC3H15  | zinc finger CCCH-type containing 15                                                                                                     |
| Q9UPT8 | ZC3H4   | zinc finger CCCH-type containing 4                                                                                                      |
| Q7Z2W4 | ZC3HAV1 | zinc finger CCCH-type, antiviral 1                                                                                                      |
| Q9NUD5 | ZCCHC3  | zinc finger, CCHC domain containing 3                                                                                                   |
| P17029 | ZKSCAN1 | zinc finger with KRAB and SCAN domains 1                                                                                                |
| Q9Y2X9 | ZNF281  | zinc finger protein 281                                                                                                                 |
| Q5BKZ1 | ZNF326  | zinc finger protein 326                                                                                                                 |
| Q9Y3S2 | ZNF330  | zinc finger protein 330                                                                                                                 |
| Q86UK7 | ZNF598  | zinc finger protein 598                                                                                                                 |
| Q9P2E3 | ZNFX1   | zinc finger, NFX1-type containing 1                                                                                                     |
| Q9Y5A6 | ZSCAN21 | zinc finger and SCAN domain containing 21                                                                                               |
| O43264 | ZW10    | zw10 kinetochore protein                                                                                                                |
| Q15942 | ZYX     | zyxin                                                                                                                                   |

Table S4:

## A. SILAC on RPE-1 cells.

| Full name                                                                                        | Light/Heavy Ratio 1 | Light/Heavy Ratio 2 | Light/Heavy Ratio 3 | Average |
|--------------------------------------------------------------------------------------------------|---------------------|---------------------|---------------------|---------|
| 1,4-alpha-glucan-branching enzyme OS=Homo sapiens GN=GBE1 PE=1 SV=3 - [GLGB_HUMAN]               | 0,83                | 0,67                | 0,81                | 0,77    |
| 116 kDa U5 small nuclear ribonucleoprotein component OS=Homo sapiens GN=EFTUD2 PE=1              | 1,06                | 0,87                | 1,25                | 1,06    |
| 14 kDa phosphohistidine phosphatase OS=Homo sapiens GN=PHPT1 PE=1 SV=1 -                         | 1,70                | -                   | -                   | 1,70    |
| 14-3-3 protein beta/alpha OS=Homo sapiens GN=YWHAB PE=1 SV=3 - [1433B_HUMAN]                     | 0,93                | 2,46                | 1,19                | 1,53    |
| 14-3-3 protein epsilon OS=Homo sapiens GN=YWHAE PE=1 SV=1 - [1433E_HUMAN]                        | 1,02                | 1,04                | 0,93                | 1,00    |
| 14-3-3 protein gamma OS=Homo sapiens GN=YWHAG PE=1 SV=2 - [1433G_HUMAN]                          | 1,00                | 1,34                | 1,30                | 1,21    |
| 14-3-3 protein theta OS=Homo sapiens GN=YWHAQ PE=1 SV=1 - [1433T_HUMAN]                          | 1,09                | 1,05                | 0,94                | 1,03    |
| 14-3-3 protein zeta/delta OS=Homo sapiens GN=YWHAZ PE=1 SV=1 - [1433Z_HUMAN]                     | 0,73                | 0,86                | 0,73                | 0,77    |
| 182 kDa tankyrase-1-binding protein OS=Homo sapiens GN=TNKS1BP1 PE=1 SV=4 -                      | -                   | 1,30                | -                   | 1,30    |
| 1-phosphatidylinositol 4,5-bisphosphate phosphodiesterase beta-3 OS=Homo sapiens GN=PLCB3        | 1,88                | 1,31                | -                   | 1,59    |
| 1-phosphatidylinositol-4,5-bisphosphate phosphodiesterase eta-1 OS=Homo sapiens GN=PLCH1         | 1,21                | 1,40                | -                   | 1,30    |
| 26S protease regulatory subunit 4 OS=Homo sapiens GN=PSMC1 PE=1 SV=1 - [PRS4_HUMAN]              | 0,70                | 0,68                | 0,61                | 0,66    |
| 26S protease regulatory subunit 6A OS=Homo sapiens GN=PSMC3 PE=1 SV=3 -                          | -                   | -                   | 1,61                | 1,61    |
| 26S protease regulatory subunit 7 OS=Homo sapiens GN=PSMC2 PE=1 SV=3 - [PRS7_HUMAN]              | 1,35                | 1,94                | -                   | 1,65    |
| 26S proteasome non-ATPase regulatory subunit 1 OS=Homo sapiens GN=PSMD1 PE=1 SV=2 -              | 0,91                | 1,35                | 0,91                | 1,06    |
| 26S proteasome non-ATPase regulatory subunit 12 OS=Homo sapiens GN=PSMD12 PE=1 SV=3 -            | -                   | 0,97                | -                   | 0,97    |
| 26S proteasome non-ATPase regulatory subunit 13 OS=Homo sapiens GN=PSMD13 PE=1 SV=2 -            | 4,56                | -                   | -                   | 4,56    |
| 26S proteasome non-ATPase regulatory subunit 2 OS=Homo sapiens GN=PSMD2 PE=1 SV=3 -              | 0,97                | 1,37                | 1,00                | 1,11    |
| 26S proteasome non-ATPase regulatory subunit 3 OS=Homo sapiens GN=PSMD3 PE=1 SV=2 -              | 1,06                | 1,41                | 1,32                | 1,26    |
| 2-oxoglutarate dehydrogenase, mitochondrial OS=Homo sapiens GN=OGDH PE=1 SV=3 -                  | 1,25                | 1,60                | 0,54                | 1,13    |
| 40S ribosomal protein S10 OS=Homo sapiens GN=RPS10 PE=1 SV=1 - [RS10_HUMAN]                      | 0,70                | 0,63                | 0,70                | 0,67    |
| 40S ribosomal protein S11 OS=Homo sapiens GN=RPS11 PE=1 SV=3 - [RS11_HUMAN]                      | 0,66                | -                   | 0,95                | 0,80    |
| 40S ribosomal protein S12 OS=Homo sapiens GN=RPS12 PE=1 SV=3 - [RS12_HUMAN]                      | -                   | 0,27                | -                   | 0,27    |
| 40S ribosomal protein S14 OS=Homo sapiens GN=RPS14 PE=1 SV=3 - [RS14_HUMAN]                      | 1,57                | 1,65                | -                   | 1,61    |
| 40S ribosomal protein S15 OS=Homo sapiens GN=RPS15 PE=1 SV=2 - [RS15_HUMAN]                      | -                   | 1,53                | -                   | 1,53    |
| 40S ribosomal protein S15a OS=Homo sapiens GN=RPS15A PE=1 SV=2 - [RS15A_HUMAN]                   | 0,84                | 0,93                | 1,05                | 0,94    |
| 40S ribosomal protein S16 OS=Homo sapiens GN=RPS16 PE=1 SV=2 - [RS16_HUMAN]                      | 0,96                | 0,91                | 0,74                | 0,87    |
| 40S ribosomal protein S17-like OS=Homo sapiens GN=RPS17L PE=1 SV=1 - [RS17L_HUMAN]               | -                   | -                   | 0,98                | 0,98    |
| 40S ribosomal protein S18 OS=Homo sapiens GN=RPS18 PE=1 SV=3 - [RS18_HUMAN]                      | 1,51                | 0,87                | 1,33                | 1,24    |
| 40S ribosomal protein S19 OS=Homo sapiens GN=RPS19 PE=1 SV=2 - [RS19_HUMAN]                      | -                   | -                   | 1,03                | 1,03    |
| 40S ribosomal protein S2 OS=Homo sapiens GN=RPS2 PE=1 SV=2 - [RS2_HUMAN]                         | 1,04                | 1,04                | 0,67                | 0,92    |
| 40S ribosomal protein S20 OS=Homo sapiens GN=RPS20 PE=1 SV=1 - [RS20_HUMAN]                      | 1,99                | -                   | -                   | 1,99    |
| 40S ribosomal protein S23 OS=Homo sapiens GN=RPS23 PE=1 SV=3 - [RS23_HUMAN]                      | 0,75                | 0,75                | 0,76                | 0,76    |
| 40S ribosomal protein S24 OS=Homo sapiens GN=RPS24 PE=1 SV=1 - [RS24_HUMAN]                      | 0,61                | 0,62                | 1,23                | 0,82    |
| 40S ribosomal protein S25 OS=Homo sapiens GN=RPS25 PE=1 SV=1 - [RS25_HUMAN]                      | -                   | 0,69                | -                   | 0,69    |
| 40S ribosomal protein S26 OS=Homo sapiens GN=RPS26 PE=1 SV=3 - [RS26_HUMAN]                      | -                   | -                   | 1,00                | 1,00    |
| 40S ribosomal protein S3 OS=Homo sapiens GN=RPS3 PE=1 SV=2 - [RS3_HUMAN]                         | 0,72                | 0,70                | 0,94                | 0,79    |
| 40S ribosomal protein S3a OS=Homo sapiens GN=RPS3A PE=1 SV=2 - [RS3A_HUMAN]                      | 1,29                | 0,88                | 1,49                | 1,22    |
| 40S ribosomal protein S4, X isoform OS=Homo sapiens GN=RPS4X PE=1 SV=2 - [RS4X_HUMAN]            | -                   | -                   | -                   | -       |
| 40S ribosomal protein S5 OS=Homo sapiens GN=RPS5 PE=1 SV=4 - [RS5_HUMAN]                         | 2,11                | 1,14                | 0,85                | 1,37    |
| 40S ribosomal protein S6 OS=Homo sapiens GN=RPS6 PE=1 SV=1 - [RS6_HUMAN]                         | 0,72                | 0,69                | 0,78                | 0,73    |
| 40S ribosomal protein S7 OS=Homo sapiens GN=RPS7 PE=1 SV=1 - [RS7_HUMAN]                         | -                   | 1,22                | -                   | 1,22    |
| 40S ribosomal protein S8 OS=Homo sapiens GN=RPS8 PE=1 SV=2 - [RS8_HUMAN]                         | 0,99                | 1,09                | 1,06                | 1,05    |
| 40S ribosomal protein S8 OS=Homo sapiens GN=RPS8 PE=1 SV=2 - [RS8_HUMAN]                         | 1,11                | 1,10                | 1,06                | 1,09    |
| 40S ribosomal protein SA OS=Homo sapiens GN=RPSA PE=1 SV=4 - [RSSA_HUMAN]                        | 0,87                | 1,34                | 1,12                | 1,11    |
| 4F2 cell-surface antigen heavy chain OS=Homo sapiens GN=SLC3A2 PE=1 SV=3 - [4F2_HUMAN]           | -                   | -                   | -                   | -       |
| 4-trimethylaminobutyraldehyde dehydrogenase OS=Homo sapiens GN=ALDH9A1 PE=1 SV=3 - [AL9A1_HUMAN] | 0,81                | 0,69                | 0,90                | 0,80    |
| 5'-nucleotidase OS=Homo sapiens GN=NT5E PE=1 SV=1 - [5NTD_HUMAN]                                 | 1,14                | 0,99                | -                   | 1,07    |
| 60 kDa heat shock protein, mitochondrial OS=Homo sapiens GN=HSPD1 PE=1 SV=2 - [CH60_HUMAN]       | 1,02                | 0,93                | 0,92                | 0,96    |
| 60S acidic ribosomal protein P0 OS=Homo sapiens GN=RPLP0 PE=1 SV=1 - [RLA0_HUMAN]                | 0,88                | 1,01                | 0,90                | 0,93    |
| 60S acidic ribosomal protein P1 OS=Homo sapiens GN=RPLP1 PE=1 SV=1 - [RLA1_HUMAN]                | 0,82                | 0,71                | 0,87                | 0,80    |
| 60S acidic ribosomal protein P2 OS=Homo sapiens GN=RPLP2 PE=1 SV=1 - [RLA2_HUMAN]                | 2,12                | 1,27                | 1,95                | 1,78    |
| 60S ribosomal protein L10a OS=Homo sapiens GN=RPL10A PE=1 SV=2 - [RL10A_HUMAN]                   | 0,64                | 0,77                | 0,90                | 0,77    |
| 60S ribosomal protein L12 OS=Homo sapiens GN=RPL12 PE=1 SV=1 - [RL12_HUMAN]                      | 1,19                | -                   | -                   | 1,19    |
| 60S ribosomal protein L13 OS=Homo sapiens GN=RPL13 PE=1 SV=4 - [RL13_HUMAN]                      | 0,89                | 0,92                | 1,11                | 0,98    |
| 60S ribosomal protein L13a OS=Homo sapiens GN=RPL13A PE=1 SV=2 - [RL13A_HUMAN]                   | 0,56                | 0,57                | 0,70                | 0,61    |
| 60S ribosomal protein L13a OS=Homo sapiens GN=RPL13A PE=1 SV=2 - [RL13A_HUMAN]                   | 1,16                | 1,38                | 1,31                | 1,28    |
| 60S ribosomal protein L14 OS=Homo sapiens GN=RPL14 PE=1 SV=4 - [RL14_HUMAN]                      | 1,09                | 0,81                | 0,95                | 0,95    |
| 60S ribosomal protein L15 OS=Homo sapiens GN=RPL15 PE=1 SV=2 - [RL15_HUMAN]                      | -                   | 1,37                | 1,41                | 1,39    |
| 60S ribosomal protein L18 OS=Homo sapiens GN=RPL18 PE=1 SV=2 - [RL18_HUMAN]                      | -                   | 1,03                | 0,93                | 1,04    |
| 60S ribosomal protein L18a OS=Homo sapiens GN=RPL18A PE=1 SV=2 - [RL18A_HUMAN]                   | 1,14                | -                   | 0,42                | 0,42    |
| 60S ribosomal protein L19 OS=Homo sapiens GN=RPL19 PE=1 SV=1 - [RL19_HUMAN]                      | -                   | 1,41                | 1,40                | 1,41    |
| 60S ribosomal protein L21 OS=Homo sapiens GN=RPL21 PE=1 SV=2 - [RL21_HUMAN]                      | -                   | 0,71                | -                   | 0,71    |
| 60S ribosomal protein L22 OS=Homo sapiens GN=RPL22 PE=1 SV=2 - [RL22_HUMAN]                      | 1,41                | 0,93                | 0,65                | 1,00    |
| 60S ribosomal protein L23 OS=Homo sapiens GN=RPL23 PE=1 SV=1 - [RL23_HUMAN]                      | 1,16                | 1,44                | 1,47                | 1,36    |
| 60S ribosomal protein L23a OS=Homo sapiens GN=RPL23A PE=1 SV=1 - [RL23A_HUMAN]                   | 0,86                | 1,02                | 1,45                | 1,11    |
| 60S ribosomal protein L24 OS=Homo sapiens GN=RPL24 PE=1 SV=1 - [RL24_HUMAN]                      | 0,74                | 0,66                | 0,59                | 0,66    |
| 60S ribosomal protein L26 OS=Homo sapiens GN=RPL26 PE=1 SV=1 - [RL26_HUMAN]                      | 2,65                | 1,16                | -                   | 1,91    |
| 60S ribosomal protein L27 OS=Homo sapiens GN=RPL27 PE=1 SV=2 - [RL27_HUMAN]                      | 0,91                | 0,89                | 0,92                | 0,91    |
| 60S ribosomal protein L27a OS=Homo sapiens GN=RPL27A PE=1 SV=2 - [RL27A_HUMAN]                   | 1,27                | 1,28                | -                   | 1,28    |
| 60S ribosomal protein L28 OS=Homo sapiens GN=RPL28 PE=1 SV=3 - [RL28_HUMAN]                      | 1,02                | 1,21                | 1,14                | 1,12    |
| 60S ribosomal protein L29 OS=Homo sapiens GN=RPL29 PE=1 SV=2 - [RL29_HUMAN]                      | 1,75                | 1,84                | -                   | 1,80    |

|                                                                                                         |       |      |      |       |
|---------------------------------------------------------------------------------------------------------|-------|------|------|-------|
| 60S ribosomal protein L3 OS=Homo sapiens GN=RPL3 PE=1 SV=2 - [RL3_HUMAN]                                | 0,88  | 0,90 | 1,12 | 0,97  |
| 60S ribosomal protein L30 OS=Homo sapiens GN=RPL30 PE=1 SV=2 - [RL30_HUMAN]                             | 1,08  | 1,03 | 0,97 | 1,03  |
| 60S ribosomal protein L31 OS=Homo sapiens GN=RPL31 PE=1 SV=1 - [RL31_HUMAN]                             | -     | 1,25 | 1,69 | 1,47  |
| 60S ribosomal protein L36a OS=Homo sapiens GN=RPL36A PE=1 SV=2 - [RL36A_HUMAN]                          | 1,20  | -    | 1,26 | 1,23  |
| 60S ribosomal protein L37a OS=Homo sapiens GN=RPL37A PE=1 SV=2 - [RL37A_HUMAN]                          | 0,76  | -    | -    | 0,76  |
| 60S ribosomal protein L4 OS=Homo sapiens GN=RPL4 PE=1 SV=5 - [RL4_HUMAN]                                | 1,04  | 0,91 | 1,07 | 1,01  |
| 60S ribosomal protein L5 OS=Homo sapiens GN=RPL5 PE=1 SV=3 - [RL5_HUMAN]                                | 1,09  | 1,01 | 1,04 | 1,05  |
| 60S ribosomal protein L6 OS=Homo sapiens GN=RPL6 PE=1 SV=3 - [RL6_HUMAN]                                | 1,05  | 1,05 | 0,90 | 1,00  |
| 60S ribosomal protein L7 OS=Homo sapiens GN=RPL7 PE=1 SV=1 - [RL7_HUMAN]                                | 1,08  | 0,89 | 0,93 | 0,97  |
| 60S ribosomal protein L7a OS=Homo sapiens GN=RPL7A PE=1 SV=2 - [RL7A_HUMAN]                             | 0,82  | 0,94 | 1,00 | 0,92  |
| 60S ribosomal protein L8 OS=Homo sapiens GN=RPL8 PE=1 SV=2 - [RL8_HUMAN]                                | -     | 0,91 | 0,93 | 0,92  |
| 60S ribosomal protein L9 OS=Homo sapiens GN=RPL9 PE=1 SV=1 - [RL9_HUMAN]                                | 1,50  | 1,89 | 1,42 | 1,61  |
| 6-phosphofruktokinase type C OS=Homo sapiens GN=PFKP PE=1 SV=1 - [K6PP_HUMAN]                           | 0,83  | 0,88 | 0,82 | 0,84  |
| 6-phosphofruktokinase, liver type OS=Homo sapiens GN=PFKL PE=1 SV=6 - [K6PL_HUMAN]                      | -     | -    | 1,51 | 1,51  |
| 6-phosphogluconate dehydrogenase, decarboxylating OS=Homo sapiens GN=PGD PE=1 SV=3 - [6PGD_HUMAN]       | 0,88  | 1,08 | 0,86 | 0,94  |
| 72 kDa type IV collagenase OS=Homo sapiens GN=MMP2 PE=1 SV=2 - [MMP2_HUMAN]                             | 1,13  | 1,03 | 0,96 | 1,04  |
| 78 kDa glucose-regulated protein OS=Homo sapiens GN=HSPA5 PE=1 SV=2 - [GRP78_HUMAN]                     | 0,96  | 1,04 | 0,92 | 0,97  |
| 7-dehydrocholesterol reductase OS=Homo sapiens GN=DHCR7 PE=1 SV=1 - [DHCR7_HUMAN]                       | 0,74  | 0,75 | 0,89 | 0,80  |
| Acetyl-CoA acetyltransferase, cytosolic OS=Homo sapiens GN=ACAT2 PE=1 SV=2 - [THIC_HUMAN]               | 1,34  | 1,62 | 1,14 | 1,37  |
| Acetyl-CoA acetyltransferase, mitochondrial OS=Homo sapiens GN=ACAT1 PE=1 SV=1 - [THIL_HUMAN]           | 2,33  | -    | -    | 2,33  |
| Aconitate hydratase, mitochondrial OS=Homo sapiens GN=ACO2 PE=1 SV=2 - [ACON_HUMAN]                     | 1,63  | 1,71 | 2,15 | 1,83  |
| Actin, alpha cardiac muscle 1 OS=Homo sapiens GN=ACTC1 PE=1 SV=1 - [ACTC_HUMAN]                         | 1,06  | 1,11 | 1,06 | 1,08  |
| Actin, cytoplasmic 1 OS=Homo sapiens GN=ACTB PE=1 SV=1 - [ACTB_HUMAN]                                   | 1,49  | 1,41 | 1,33 | 1,41  |
| Actin-related protein 2 OS=Homo sapiens GN=ACTR2 PE=1 SV=1 - [ARP2_HUMAN]                               | -     | 1,97 | -    | 1,97  |
| Actin-related protein 2/3 complex subunit 1B OS=Homo sapiens GN=ARPC1B PE=1 SV=3 - [ARC1B_HUMAN]        | -     | 0,81 | 0,82 | 0,82  |
| Actin-related protein 2/3 complex subunit 2 OS=Homo sapiens GN=ARPC2 PE=1 SV=1 - [ARPC2_HUMAN]          | -     | -    | 0,91 | 0,91  |
| Actin-related protein 2/3 complex subunit 3 OS=Homo sapiens GN=ARPC3 PE=1 SV=3 - [ARPC3_HUMAN]          | -     | 0,25 | -    | 0,25  |
| Actin-related protein 2/3 complex subunit 4 OS=Homo sapiens GN=ARPC4 PE=1 SV=3 - [ARPC4_HUMAN]          | 1,48  | 1,70 | 0,98 | 1,39  |
| Actin-related protein 3 OS=Homo sapiens GN=ACTR3 PE=1 SV=3 - [ARP3_HUMAN]                               | 0,96  | 0,99 | 0,81 | 0,92  |
| Activating signal cointegrator 1 complex subunit 2 OS=Homo sapiens GN=ASCC2 PE=1 SV=3 - [ASCC2_HUMAN]   | 20,23 | -    | -    | 20,23 |
| Acylamino-acid-releasing enzyme OS=Homo sapiens GN=APEH PE=1 SV=4 - [ACPH_HUMAN]                        | 1,27  | 1,64 | 1,00 | 1,30  |
| Acyl-protein thioesterase 2 OS=Homo sapiens GN=LYPLA2 PE=1 SV=1 - [LYPA2_HUMAN]                         | 0,96  | -    | -    | 0,96  |
| Adenine phosphoribosyltransferase OS=Homo sapiens GN=APRT PE=1 SV=2 - [APT_HUMAN]                       | 2,36  | 2,18 | -    | 2,27  |
| Adenosine kinase OS=Homo sapiens GN=ADK PE=1 SV=2 - [ADK_HUMAN]                                         | 0,69  | 1,56 | 1,28 | 1,18  |
| Adenosylhomocysteinase OS=Homo sapiens GN=AHCY PE=1 SV=4 - [SAHH_HUMAN]                                 | 0,89  | 0,80 | 2,54 | 1,41  |
| Adenylyl cyclase-associated protein 1 OS=Homo sapiens GN=CAP1 PE=1 SV=5 - [CAP1_HUMAN]                  | 0,88  | 0,91 | 0,79 | 0,86  |
| ADP/ATP translocase 2 OS=Homo sapiens GN=SLC25A5 PE=1 SV=7 - [ADT2_HUMAN]                               | 0,70  | 0,98 | 1,45 | 1,04  |
| ADP/ATP translocase 3 OS=Homo sapiens GN=SLC25A6 PE=1 SV=4 - [ADT3_HUMAN]                               | 0,84  | -    | 2,14 | 1,49  |
| ADP-ribosylation factor 3 OS=Homo sapiens GN=ARF3 PE=1 SV=2 - [ARF3_HUMAN]                              | 2,43  | 1,04 | 1,39 | 1,62  |
| ADP-ribosylation factor 4 OS=Homo sapiens GN=ARF4 PE=1 SV=3 - [ARF4_HUMAN]                              | 0,97  | 0,88 | 0,71 | 0,85  |
| A-kinase anchor protein 12 OS=Homo sapiens GN=AKAP12 PE=1 SV=4 - [AKA12_HUMAN]                          | 1,09  | 1,23 | 1,34 | 1,22  |
| A-kinase anchor protein 2 OS=Homo sapiens GN=AKAP2 PE=1 SV=3 - [AKAP2_HUMAN]                            | 2,68  | 2,31 | 1,81 | 2,27  |
| Alanine--tRNA ligase, cytoplasmic OS=Homo sapiens GN=AARS PE=1 SV=2 - [SYAC_HUMAN]                      | 0,84  | 0,80 | 0,84 | 0,83  |
| Aldose reductase OS=Homo sapiens GN=AKR1B1 PE=1 SV=3 - [ALDR_HUMAN]                                     | 0,76  | 1,46 | 0,77 | 1,00  |
| Alkyldihydroxyacetonephosphate synthase, peroxisomal OS=Homo sapiens GN=AGPS PE=1 SV=1 - [ADAS_HUMAN]   | -     | 1,51 | -    | 1,51  |
| All-trans-retinol 13,14-reductase OS=Homo sapiens GN=RETSAT PE=1 SV=2 - [RETST_HUMAN]                   | -     | 6,50 | -    | 6,50  |
| Alpha-actinin-1 OS=Homo sapiens GN=ACTN1 PE=1 SV=2 - [ACTN1_HUMAN]                                      | 0,97  | 0,97 | 0,96 | 0,97  |
| Alpha-actinin-4 OS=Homo sapiens GN=ACTN4 PE=1 SV=2 - [ACTN4_HUMAN]                                      | 1,00  | 1,04 | 1,06 | 1,03  |
| Alpha-adducin OS=Homo sapiens GN=ADD1 PE=1 SV=2 - [ADDA_HUMAN]                                          | 0,54  | -    | 0,63 | 0,58  |
| Alpha-aminoacidic semialdehyde synthase, mitochondrial OS=Homo sapiens GN=AASS PE=1 SV=1 - [AASS_HUMAN] | -     | 4,23 | -    | 4,23  |
| Alpha-centractin OS=Homo sapiens GN=ACTR1A PE=1 SV=1 - [ACTZ_HUMAN]                                     | 0,49  | 0,54 | 0,95 | 0,66  |
| Alpha-enolase OS=Homo sapiens GN=ENO1 PE=1 SV=2 - [ENOA_HUMAN]                                          | 0,92  | 0,96 | 0,91 | 0,93  |
| Alpha-mannosidase 2 OS=Homo sapiens GN=MAN2A1 PE=1 SV=2 - [MA2A1_HUMAN]                                 | -     | -    | 0,89 | 0,89  |
| Alpha-parvin OS=Homo sapiens GN=PARVA PE=1 SV=1 - [PARVA_HUMAN]                                         | 0,71  | -    | -    | 0,71  |
| Amphoterin-induced protein 2 OS=Homo sapiens GN=AMIGO2 PE=1 SV=1 - [AMGO2_HUMAN]                        | 0,76  | -    | 1,77 | 1,26  |
| Amyloid beta A4 protein OS=Homo sapiens GN=APP PE=1 SV=3 - [A4_HUMAN]                                   | 0,98  | 0,97 | 0,94 | 0,96  |
| Amyloid-like protein 2 OS=Homo sapiens GN=APLP2 PE=1 SV=2 - [APLP2_HUMAN]                               | 0,72  | 0,71 | 0,78 | 0,74  |
| Anion exchange protein 2 OS=Homo sapiens GN=SLC4A2 PE=1 SV=4 - [B3A2_HUMAN]                             | 2,30  | -    | -    | 2,30  |
| Ankycorbin OS=Homo sapiens GN=RAI14 PE=1 SV=2 - [RAI14_HUMAN]                                           | 0,77  | 1,05 | 0,79 | 0,87  |
| Annexin A1 OS=Homo sapiens GN=ANXA1 PE=1 SV=2 - [ANXA1_HUMAN]                                           | 0,94  | 1,00 | 1,08 | 1,01  |
| Annexin A11 OS=Homo sapiens GN=ANXA11 PE=1 SV=1 - [ANX11_HUMAN]                                         | 1,83  | 0,90 | 1,06 | 1,26  |
| Annexin A2 OS=Homo sapiens GN=ANXA2 PE=1 SV=2 - [ANXA2_HUMAN]                                           | 0,92  | 0,96 | 0,95 | 0,94  |
| Annexin A4 OS=Homo sapiens GN=ANXA4 PE=1 SV=4 - [ANXA4_HUMAN]                                           | 0,57  | 0,97 | 0,84 | 0,79  |



|                                                                                                                   |      |      |      |      |
|-------------------------------------------------------------------------------------------------------------------|------|------|------|------|
| Annexin A5 OS=Homo sapiens GN=ANXA5 PE=1 SV=2 - [ANXA5_HUMAN]                                                     | 0,92 | 0,91 | 0,87 | 0,90 |
| Annexin A6 OS=Homo sapiens GN=ANXA6 PE=1 SV=3 - [ANXA6_HUMAN]                                                     | 0,95 | 0,94 | 0,88 | 0,92 |
| Annexin A7 OS=Homo sapiens GN=ANXA7 PE=1 SV=3 - [ANXA7_HUMAN]                                                     | 0,94 | 2,05 | 1,05 | 1,35 |
| AP-1 complex subunit beta-1 OS=Homo sapiens GN=AP1B1 PE=1 SV=2 - [AP1B1_HUMAN]                                    | 1,00 | 1,06 | 1,32 | 1,12 |
| AP-1 complex subunit gamma-1 OS=Homo sapiens GN=AP1G1 PE=1 SV=5 - [AP1G1_HUMAN]                                   |      |      |      |      |
|                                                                                                                   | 0,90 | 1,54 | 1,18 | 1,21 |
| AP-2 complex subunit alpha-1 OS=Homo sapiens GN=AP2A1 PE=1 SV=3 - [AP2A1_HUMAN]                                   | 1,29 | 1,13 | 1,06 | 1,16 |
| AP-2 complex subunit alpha-2 OS=Homo sapiens GN=AP2A2 PE=1 SV=2 - [AP2A2_HUMAN]                                   | 1,54 | 1,19 | 1,90 | 1,54 |
| AP-2 complex subunit beta OS=Homo sapiens GN=AP2B1 PE=1 SV=1 - [AP2B1_HUMAN]                                      | 1,23 | 1,13 | 1,06 | 1,14 |
| AP-2 complex subunit mu OS=Homo sapiens GN=AP2M1 PE=1 SV=2 - [AP2M1_HUMAN]                                        | 1,49 | -    | 0,99 | 1,24 |
| AP-3 complex subunit beta-1 OS=Homo sapiens GN=AP3B1 PE=1 SV=3 - [AP3B1_HUMAN]                                    | 0,98 | 0,56 | 0,80 | 0,78 |
| AP-3 complex subunit delta-1 OS=Homo sapiens GN=AP3D1 PE=1 SV=1 - [AP3D1_HUMAN]                                   | 1,46 | 1,35 | 1,99 | 1,60 |
| Apolipoprotein E OS=Homo sapiens GN=APOE PE=1 SV=1 - [APOE_HUMAN]                                                 | -    | -    | 3,50 | 3,50 |
| Apoptosis-inducing factor 1, mitochondrial OS=Homo sapiens GN=AIFM1 PE=1 SV=1 - [AIFM1_HUMAN]                     | 0,98 | -    | -    | 0,98 |
| Arginine--tRNA ligase, cytoplasmic OS=Homo sapiens GN=RARS PE=1 SV=2 - [SYRC_HUMAN]                               |      |      |      |      |
|                                                                                                                   | 0,64 | 1,06 | 0,97 | 0,89 |
| Asparagine--tRNA ligase, cytoplasmic OS=Homo sapiens GN=NARS PE=1 SV=1 - [SYNC_HUMAN]                             | 0,92 | 1,82 | 1,28 | 1,34 |
| Aspartate aminotransferase, mitochondrial OS=Homo sapiens GN=GOT2 PE=1 SV=3 - [AATM_HUMAN]                        | 2,07 | 1,50 | 1,11 | 1,56 |
| Aspartate--tRNA ligase, cytoplasmic OS=Homo sapiens GN=DARS PE=1 SV=2 - [SYDC_HUMAN]                              | -    | 1,22 | -    | 1,22 |
| Aspartyl/asparaginyl beta-hydroxylase OS=Homo sapiens GN=ASPH PE=1 SV=3 - [ASPH_HUMAN]                            | 0,84 | 1,00 | 0,91 | 0,92 |
| Astrocytic phosphoprotein PEA-15 OS=Homo sapiens GN=PEA15 PE=1 SV=2 - [PEA15_HUMAN]                               |      |      |      |      |
|                                                                                                                   | 0,83 | 0,78 | 0,68 | 0,76 |
| ATP synthase subunit alpha, mitochondrial OS=Homo sapiens GN=ATP5A1 PE=1 SV=1 - [ATPA_HUMAN]                      | 1,15 | 1,04 | 1,18 | 1,12 |
| ATP synthase subunit beta, mitochondrial OS=Homo sapiens GN=ATP5B PE=1 SV=3 - [ATPB_HUMAN]                        | 1,60 | 1,50 | 1,22 | 1,44 |
| ATP synthase subunit gamma, mitochondrial OS=Homo sapiens GN=ATP5C1 PE=1 SV=1 - [ATPG_HUMAN]                      | -    | -    | 1,17 | 1,17 |
| ATPase family AAA domain-containing protein 3B OS=Homo sapiens GN=ATAD3B PE=1 SV=1 - [ATD3B_HUMAN]                | -    | -    | 0,84 | 0,84 |
| ATP-binding cassette sub-family E member 1 OS=Homo sapiens GN=ABCE1 PE=1 SV=1 - [ABCE1_HUMAN]                     | 0,72 | -    | -    | 0,72 |
| ATP-binding cassette sub-family F member 1 OS=Homo sapiens GN=ABCF1 PE=1 SV=2 - [ABCF1_HUMAN]                     | 0,78 | 1,09 | 1,03 | 0,97 |
| ATP-citrate synthase OS=Homo sapiens GN=ACLY PE=1 SV=3 - [ACLY_HUMAN]                                             | 1,02 | 1,04 | 0,98 | 1,01 |
| ATP-dependent RNA helicase A OS=Homo sapiens GN=DHX9 PE=1 SV=4 - [DHX9_HUMAN]                                     | 0,85 | 0,92 | 0,88 | 0,88 |
| ATP-dependent RNA helicase DDX1 OS=Homo sapiens GN=DDX1 PE=1 SV=2 - [DDX1_HUMAN]                                  |      |      |      |      |
|                                                                                                                   | 0,85 | 0,88 | 0,76 | 0,83 |
| ATP-dependent RNA helicase DDX3X OS=Homo sapiens GN=DDX3X PE=1 SV=3 - [DDX3X_HUMAN]                               | 0,86 | 0,63 | 0,68 | 0,73 |
| ATP-dependent RNA helicase DHX29 OS=Homo sapiens GN=DHX29 PE=1 SV=2 - [DHX29_HUMAN]                               | -    | 0,56 | -    | 0,56 |
| BAG family molecular chaperone regulator 3 OS=Homo sapiens GN=BAG3 PE=1 SV=3 - [BAG3_HUMAN]                       | -    | -    | 0,52 | 0,52 |
| Band 4.1-like protein 2 OS=Homo sapiens GN=EPB41L2 PE=1 SV=1 - [E41L2_HUMAN]                                      | 0,14 | -    | -    | 0,14 |
| Basigin OS=Homo sapiens GN=BSG PE=1 SV=2 - [BASL_HUMAN]                                                           | 0,91 | 0,83 | 2,40 | 1,38 |
| Bcl-2-associated transcription factor 1 OS=Homo sapiens GN=BCLAF1 PE=1 SV=2 - [BCLF1_HUMAN]                       | -    | 1,00 | -    | 1,00 |
| Beta-actin-like protein 2 OS=Homo sapiens GN=ACTBL2 PE=1 SV=2 - [ACTBL_HUMAN]                                     | 0,95 | 1,01 | 0,91 | 0,95 |
| Bifunctional 3'-phosphoadenosine 5'-phosphosulfate synthase 2 OS=Homo sapiens GN=PAPSS2 PE=1 SV=2 - [PAPS2_HUMAN] | 1,64 | 0,42 | 1,76 | 1,27 |
| Bifunctional glutamate/proline--tRNA ligase OS=Homo sapiens GN=EPRS PE=1 SV=5 - [SYEP_HUMAN]                      | 0,90 | 0,96 | 0,88 | 0,92 |
| Bifunctional purine biosynthesis protein PURH OS=Homo sapiens GN=ATIC PE=1 SV=3 - [PUR9_HUMAN]                    | 1,33 | 1,26 | 1,36 | 1,32 |
| Brain acid soluble protein 1 OS=Homo sapiens GN=BASP1 PE=1 SV=2 - [BASP1_HUMAN]                                   | 2,82 | 1,91 | 2,63 | 2,45 |
| Brain protein I3 OS=Homo sapiens GN=BRI3 PE=2 SV=1 - [BRI3_HUMAN]                                                 | 1,81 | -    | -    | 1,81 |
| C-1-tetrahydrofolate synthase, cytoplasmic OS=Homo sapiens GN=MTHFD1 PE=1 SV=3 - [C1TC_HUMAN]                     | 1,22 | 1,10 | 1,15 | 1,15 |
| CAD protein OS=Homo sapiens GN=CAD PE=1 SV=3 - [PYR1_HUMAN]                                                       | 1,03 | 3,31 | 0,82 | 1,72 |
| Calcium-activated potassium channel subunit alpha-1 OS=Homo sapiens GN=KCNMA1 PE=1 SV=2 - [KCMA1_HUMAN]           | 1,57 | -    | 0,26 | 0,92 |
| Calcium-binding and coiled-coil domain-containing protein 1 OS=Homo sapiens GN=CALCOCO1 PE=1 SV=2 - [CACO1_HUMAN] | 1,59 | 2,40 | 1,31 | 1,76 |
| Calcium-transporting ATPase type 2C member 1 OS=Homo sapiens GN=ATP2C1 PE=1 SV=3 - [AT2C1_HUMAN]                  | 0,60 | -    | 0,48 | 0,54 |
| Caldesmon OS=Homo sapiens GN=CALD1 PE=1 SV=3 - [CALD1_HUMAN]                                                      | 1,55 | 1,22 | 1,60 | 1,45 |
| Calmodulin OS=Homo sapiens GN=CALM1 PE=1 SV=2 - [CALM_HUMAN]                                                      | 1,12 | 0,96 | 0,76 | 0,95 |
| Calnexin OS=Homo sapiens GN=CANX PE=1 SV=2 - [CALX_HUMAN]                                                         | 1,47 | 1,43 | 1,23 | 1,37 |
| Calpain small subunit 1 OS=Homo sapiens GN=CAPNS1 PE=1 SV=1 - [CPNS1_HUMAN]                                       | 2,54 | 1,06 | -    | 1,80 |
| Calpain-1 catalytic subunit OS=Homo sapiens GN=CAPN1 PE=1 SV=1 - [CAN1_HUMAN]                                     | 1,41 | 1,24 | 1,38 | 1,34 |
| Calpain-2 catalytic subunit OS=Homo sapiens GN=CAPN2 PE=1 SV=6 - [CAN2_HUMAN]                                     | 1,24 | 1,11 | 1,20 | 1,18 |
| Calpastatin OS=Homo sapiens GN=CAST PE=1 SV=4 - [ICAL_HUMAN]                                                      | 1,51 | 1,77 | 2,07 | 1,78 |
| Calponin-2 OS=Homo sapiens GN=CNN2 PE=1 SV=4 - [CNN2_HUMAN]                                                       | 6,53 | -    | -    | 6,53 |
| Calponin-3 OS=Homo sapiens GN=CNN3 PE=1 SV=1 - [CNN3_HUMAN]                                                       | 0,97 | 0,95 | 0,83 | 0,92 |
| Calreticulin OS=Homo sapiens GN=CALR PE=1 SV=1 - [CALR_HUMAN]                                                     | 1,66 | 1,54 | 1,34 | 1,51 |
| Calumenin OS=Homo sapiens GN=CALU PE=1 SV=2 - [CALU_HUMAN]                                                        | 1,15 | 1,03 | 0,90 | 1,02 |

|                                                                                                                   |      |      |      |      |
|-------------------------------------------------------------------------------------------------------------------|------|------|------|------|
| cAMP-dependent protein kinase type I-alpha regulatory subunit OS=Homo sapiens GN=PRKAR1A PE=1 SV=1 - [KAP0_HUMAN] | 1,73 | 1,83 | 1,23 | 1,59 |
| Caprin-1 OS=Homo sapiens GN=CAPRIN1 PE=1 SV=2 - [CAPR1_HUMAN]                                                     | 0,56 | 0,84 | 0,59 | 0,66 |
| Carbonyl reductase [NADPH] 1 OS=Homo sapiens GN=CBR1 PE=1 SV=3 - [CBR1_HUMAN]                                     | -    | -    | 1,25 | 1,25 |
| Carnitine O-palmitoyltransferase 1, liver isoform OS=Homo sapiens GN=CPT1A PE=1 SV=2 - [CPT1A_HUMAN]              | 0,69 | 0,83 | 1,36 | 0,96 |
| Catalase OS=Homo sapiens GN=CAT PE=1 SV=3 - [CATA_HUMAN]                                                          | 0,45 | -    | -    | 0,45 |
| Catenin alpha-1 OS=Homo sapiens GN=CTNNA1 PE=1 SV=1 - [CTNA1_HUMAN]                                               | 0,82 | 0,78 | 0,72 | 0,77 |
| Catenin beta-1 OS=Homo sapiens GN=CTNNA1 PE=1 SV=1 - [CTNB1_HUMAN]                                                | 1,75 | 2,19 | 1,82 | 1,92 |
| Catenin delta-1 OS=Homo sapiens GN=CTNND1 PE=1 SV=1 - [CTND1_HUMAN]                                               | 0,89 | 1,96 | 1,41 | 1,42 |
| Cathepsin D OS=Homo sapiens GN=CTSD PE=1 SV=1 - [CATD_HUMAN]                                                      | 1,14 | 0,97 | 1,02 | 1,05 |
| Cation-dependent mannose-6-phosphate receptor OS=Homo sapiens GN=M6PR PE=1 SV=1 - [MPRD_HUMAN]                    | 0,86 | 1,51 | 1,23 | 1,20 |
| Cation-independent mannose-6-phosphate receptor OS=Homo sapiens GN=IGF2R PE=1 SV=3 - [MPRI_HUMAN]                 | 1,05 | 1,04 | 1,07 | 1,05 |
| Caveolin-1 OS=Homo sapiens GN=CAV1 PE=1 SV=4 - [CAV1_HUMAN]                                                       | 1,29 | 1,21 | 1,20 | 1,23 |
| CD151 antigen OS=Homo sapiens GN=CD151 PE=1 SV=3 - [CD151_HUMAN]                                                  | 0,71 | 0,71 | 0,67 | 0,70 |
| CD166 antigen OS=Homo sapiens GN=ALCAM PE=1 SV=2 - [CD166_HUMAN]                                                  | 1,23 | 1,07 | 1,00 | 1,10 |
| CD276 antigen OS=Homo sapiens GN=CD276 PE=1 SV=1 - [CD276_HUMAN]                                                  | 2,28 | -    | -    | 2,28 |
| CD44 antigen OS=Homo sapiens GN=CD44 PE=1 SV=3 - [CD44_HUMAN]                                                     | 0,69 | 0,72 | 0,69 | 0,70 |
| CD59 glycoprotein OS=Homo sapiens GN=CD59 PE=1 SV=1 - [CD59_HUMAN]                                                | 0,94 | 0,97 | 0,97 | 0,96 |
| CD63 antigen OS=Homo sapiens GN=CD63 PE=1 SV=2 - [CD63_HUMAN]                                                     | 0,56 | 1,06 | 1,42 | 1,01 |
| CD81 antigen OS=Homo sapiens GN=CD81 PE=1 SV=1 - [CD81_HUMAN]                                                     | 1,11 | 1,42 | -    | 1,26 |
| Cell cycle and apoptosis regulator protein 2 OS=Homo sapiens GN=CCAR2 PE=1 SV=2 - [CCAR2_HUMAN]                   | 0,90 | 1,09 | 1,11 | 1,03 |
| Cell division control protein 42 homolog OS=Homo sapiens GN=CDC42 PE=1 SV=2 - [CDC42_HUMAN]                       | -    | -    | 1,19 | 1,19 |
| Centrosomal protein of 170 kDa OS=Homo sapiens GN=CEP170 PE=1 SV=1 - [CE170_HUMAN]                                | 0,77 | -    | 0,84 | 0,80 |
| Chloride intracellular channel protein 1 OS=Homo sapiens GN=CLIC1 PE=1 SV=4 - [CLIC1_HUMAN]                       | 1,13 | 1,24 | 1,11 | 1,16 |
| Chloride intracellular channel protein 4 OS=Homo sapiens GN=CLIC4 PE=1 SV=4 - [CLIC4_HUMAN]                       | -    | 2,23 | 1,16 | 1,69 |
| Citrate synthase, mitochondrial OS=Homo sapiens GN=CS PE=1 SV=2 - [CISY_HUMAN]                                    | -    | 1,67 | 0,91 | 1,29 |
| Clathrin heavy chain 1 OS=Homo sapiens GN=CLTC PE=1 SV=5 - [CLH1_HUMAN]                                           | 0,92 | 0,96 | 0,96 | 0,95 |
| Cleavage and polyadenylation specificity factor subunit 6 OS=Homo sapiens GN=CPSF6 PE=1 SV=2 - [CPSF6_HUMAN]      | 0,55 | 0,74 | 1,95 | 1,08 |
| Cleft lip and palate transmembrane protein 1 OS=Homo sapiens GN=CLPTM1 PE=1 SV=1 - [CLPT1_HUMAN]                  | 1,67 | 1,40 | 1,51 | 1,53 |
| Coactosin-like protein OS=Homo sapiens GN=COTL1 PE=1 SV=3 - [COTL1_HUMAN]                                         | 1,13 | 0,91 | 1,09 | 1,04 |
| Coatomer subunit alpha OS=Homo sapiens GN=COPA PE=1 SV=2 - [COPA_HUMAN]                                           | 0,87 | 0,97 | 0,88 | 0,91 |
| Coatomer subunit beta OS=Homo sapiens GN=COPB1 PE=1 SV=3 - [COPB_HUMAN]                                           | 1,09 | 0,89 | 1,36 | 1,11 |
| Coatomer subunit beta' OS=Homo sapiens GN=COPB2 PE=1 SV=2 - [COPB2_HUMAN]                                         | 0,87 | 0,98 | 1,03 | 0,96 |
| Coatomer subunit delta OS=Homo sapiens GN=ARCN1 PE=1 SV=1 - [COPD_HUMAN]                                          | -    | -    | 1,13 | 1,13 |
| Coatomer subunit gamma-1 OS=Homo sapiens GN=COPG1 PE=1 SV=1 - [COPG1_HUMAN]                                       | 1,42 | 1,16 | 1,20 | 1,26 |
| Cofilin-1 OS=Homo sapiens GN=CFL1 PE=1 SV=3 - [COF1_HUMAN]                                                        | 0,98 | 1,37 | 1,15 | 1,17 |
| Cold shock domain-containing protein E1 OS=Homo sapiens GN=CSDE1 PE=1 SV=2 - [CSDE1_HUMAN]                        | 0,71 | 1,13 | 1,59 | 1,14 |
| Complement decay-accelerating factor OS=Homo sapiens GN=CD55 PE=1 SV=4 - [DAF_HUMAN]                              | 0,67 | -    | -    | 0,67 |
| Condensin complex subunit 1 OS=Homo sapiens GN=NCAPD2 PE=1 SV=3 - [CND1_HUMAN]                                    | 1,14 | -    | -    | 1,14 |
| Connective tissue growth factor OS=Homo sapiens GN=CTGF PE=1 SV=2 - [CTGF_HUMAN]                                  | -    | 0,55 | -    | 0,55 |
| Constitutive coactivator of PPAR-gamma-like protein 1 OS=Homo sapiens GN=FAM120A PE=1 SV=2 - [F120A_HUMAN]        | 1,33 | 1,55 | 1,05 | 1,31 |
| Copine-1 OS=Homo sapiens GN=CPNE1 PE=1 SV=1 - [CPNE1_HUMAN]                                                       | 1,17 | 1,41 | 3,55 | 2,04 |
| Copine-3 OS=Homo sapiens GN=CPNE3 PE=1 SV=1 - [CPNE3_HUMAN]                                                       | 0,64 | 1,00 | 0,96 | 0,87 |
| Coronin-1B OS=Homo sapiens GN=CORO1B PE=1 SV=1 - [COR1B_HUMAN]                                                    | 1,04 | 1,43 | 1,13 | 1,20 |
| Coronin-1C OS=Homo sapiens GN=CORO1C PE=1 SV=1 - [COR1C_HUMAN]                                                    | 0,99 | 0,98 | 1,09 | 1,02 |
| CTP synthase 1 OS=Homo sapiens GN=CTPS1 PE=1 SV=2 - [PYRG1_HUMAN]                                                 | -    | -    | 2,57 | 2,57 |
| Cullin-2 OS=Homo sapiens GN=CUL2 PE=1 SV=2 - [CUL2_HUMAN]                                                         | 0,77 | -    | -    | 0,77 |
| Cullin-4B OS=Homo sapiens GN=CUL4B PE=1 SV=4 - [CUL4B_HUMAN]                                                      | 0,87 | 0,77 | 0,88 | 0,84 |
| Cullin-associated NEDD8-dissociated protein 1 OS=Homo sapiens GN=CAND1 PE=1 SV=2 - [CAND1_HUMAN]                  | 0,92 | 0,87 | 0,94 | 0,91 |
| Cystatin-B OS=Homo sapiens GN=CSTB PE=1 SV=2 - [CYTB_HUMAN]                                                       | 0,85 | -    | 1,05 | 0,95 |
| Cysteine and glycine-rich protein 1 OS=Homo sapiens GN=CSRP1 PE=1 SV=3 - [CSRP1_HUMAN]                            | -    | 0,64 | 0,69 | 0,67 |
| Cysteine-rich motor neuron 1 protein OS=Homo sapiens GN=CRIM1 PE=1 SV=1 - [CRIM1_HUMAN]                           | 1,24 | 0,88 | 0,98 | 1,04 |
| Cytochrome b-c1 complex subunit 2, mitochondrial OS=Homo sapiens GN=UQCRC2 PE=1 SV=3 - [QCR2_HUMAN]               | -    | 1,83 | 1,30 | 1,57 |
| Cytochrome c OS=Homo sapiens GN=CYCS PE=1 SV=2 - [CYC_HUMAN]                                                      | 0,91 | 0,83 | 0,89 | 0,88 |
| Cytoplasmic aconitate hydratase OS=Homo sapiens GN=ACO1 PE=1 SV=3 - [ACOC_HUMAN]                                  | 1,26 | 1,61 | 1,50 | 1,46 |
| Cytoplasmic dynein 1 heavy chain 1 OS=Homo sapiens GN=DYNC1H1 PE=1 SV=5 - [DYHC1_HUMAN]                           | 1,00 | 0,97 | 0,96 | 0,98 |
| Cytoplasmic dynein 1 intermediate chain 2 OS=Homo sapiens GN=DYNC1I2 PE=1 SV=3 - [DC1I2_HUMAN]                    | 0,77 | 0,98 | 0,91 | 0,88 |
| Cytoplasmic FMR1-interacting protein 1 OS=Homo sapiens GN=CYFIP1 PE=1 SV=1 - [CYFIP1_HUMAN]                       | 0,96 | 0,90 | 0,72 | 0,86 |
| Cytoskeleton-associated protein 4 OS=Homo sapiens GN=CKAP4 PE=1 SV=2 - [CKAP4_HUMAN]                              | 0,91 | 0,91 | 0,81 | 0,87 |

|                                                                                                                                                                   |      |      |      |      |
|-------------------------------------------------------------------------------------------------------------------------------------------------------------------|------|------|------|------|
| Cytoskeleton-associated protein 5 OS=Homo sapiens GN=CKAP5 PE=1 SV=3 - [CKAP5_HUMAN]                                                                              | 0,80 | 0,91 | -    | 0,86 |
| Cytosolic acyl coenzyme A thioester hydrolase OS=Homo sapiens GN=ACOT7 PE=1 SV=3 - [BACH_HUMAN]                                                                   | 0,91 | -    | -    | 0,91 |
| Cytosolic non-specific dipeptidase OS=Homo sapiens GN=CNDP2 PE=1 SV=2 - [CNDP2_HUMAN]                                                                             | -    | -    | 6,53 | 6,53 |
| D-3-phosphoglycerate dehydrogenase OS=Homo sapiens GN=PHGDH PE=1 SV=4 - [SERA_HUMAN]                                                                              | 0,72 | 0,51 | 0,43 | 0,55 |
| Delta and Notch-like epidermal growth factor-related receptor OS=Homo sapiens GN=DNER PE=1 SV=1 - [DNER_HUMAN]                                                    | 0,79 | 0,70 | 0,68 | 0,72 |
| Delta(24)-sterol reductase OS=Homo sapiens GN=DHCR24 PE=1 SV=2 - [DHCR24_HUMAN]                                                                                   | 2,20 | 1,21 | -    | 1,71 |
| Delta-1-pyrroline-5-carboxylate synthase OS=Homo sapiens GN=ALDH18A1 PE=1 SV=2 - [P5CS_HUMAN]                                                                     | 1,29 | 1,69 | 1,86 | 1,61 |
| Desmoglein-2 OS=Homo sapiens GN=DSG2 PE=1 SV=2 - [DSG2_HUMAN]                                                                                                     | 1,60 | 0,56 | 0,49 | 0,89 |
| Destrin OS=Homo sapiens GN=DSTN PE=1 SV=3 - [DEST_HUMAN]                                                                                                          | 0,73 | 0,81 | 0,65 | 0,73 |
| Dihydrolipoyllysine-residue succinyltransferase component of 2-oxoglutarate dehydrogenase complex, mitochondrial OS=Homo sapiens GN=DLST PE=1 SV=4 - [ODO2_HUMAN] | -    | 0,71 | -    | 0,71 |
| Dihydropyrimidinase-related protein 2 OS=Homo sapiens GN=DPYSL2 PE=1 SV=1 - [DPYL2_HUMAN]                                                                         | 0,89 | 1,02 | 0,88 | 0,93 |
| Dihydropyrimidinase-related protein 3 OS=Homo sapiens GN=DPYSL3 PE=1 SV=1 - [DPYL3_HUMAN]                                                                         | 0,74 | -    | -    | 0,74 |
| Dipeptidyl peptidase 3 OS=Homo sapiens GN=DPP3 PE=1 SV=2 - [DPP3_HUMAN]                                                                                           | 1,08 | 0,99 | 1,03 | 1,03 |
| Dipeptidyl peptidase 9 OS=Homo sapiens GN=DPP9 PE=1 SV=3 - [DPP9_HUMAN]                                                                                           | -    | 0,99 | -    | 0,99 |
| Disabled homolog 2 OS=Homo sapiens GN=DAB2 PE=1 SV=3 - [DAB2_HUMAN]                                                                                               | -    | -    | 0,82 | 0,82 |
| Discoidin domain-containing receptor 2 OS=Homo sapiens GN=DDR2 PE=1 SV=2 - [DDR2_HUMAN]                                                                           | 0,76 | 0,61 | -    | 0,68 |
| Discoidin, CUB and LCCL domain-containing protein 2 OS=Homo sapiens GN=DCBLD2 PE=1 SV=1 - [DCBD2_HUMAN]                                                           | 0,84 | 0,76 | 0,73 | 0,78 |
| Disintegrin and metalloproteinase domain-containing protein 9 OS=Homo sapiens GN=ADAM9 PE=1 SV=1 - [ADAM9_HUMAN]                                                  | 0,95 | 1,33 | 1,03 | 1,10 |
| Disks large homolog 1 OS=Homo sapiens GN=DLG1 PE=1 SV=2 - [DLG1_HUMAN]                                                                                            | 1,29 | 0,81 | 0,79 | 0,96 |
| DNA damage-binding protein 1 OS=Homo sapiens GN=DDB1 PE=1 SV=1 - [DDB1_HUMAN]                                                                                     | 0,66 | 0,76 | 0,90 | 0,78 |
| DNA replication licensing factor MCM2 OS=Homo sapiens GN=MCM2 PE=1 SV=4 - [MCM2_HUMAN]                                                                            | -    | -    | 0,22 | 0,22 |
| DNA topoisomerase 1 OS=Homo sapiens GN=TOP1 PE=1 SV=2 - [TOP1_HUMAN]                                                                                              | 1,01 | 0,72 | 0,98 | 0,90 |
| DNA-dependent protein kinase catalytic subunit OS=Homo sapiens GN=PRKDC PE=1 SV=3 - [PRKDC_HUMAN]                                                                 | 0,88 | 0,88 | 0,81 | 0,86 |
| DnaJ homolog subfamily A member 1 OS=Homo sapiens GN=DNAJA1 PE=1 SV=2 - [DNJA1_HUMAN]                                                                             | 0,42 | 0,34 | 0,46 | 0,41 |
| DnaJ homolog subfamily A member 2 OS=Homo sapiens GN=DNAJA2 PE=1 SV=1 - [DNJA2_HUMAN]                                                                             | 0,60 | 0,64 | 0,57 | 0,60 |
| DnaJ homolog subfamily C member 10 OS=Homo sapiens GN=DNAJC10 PE=1 SV=2 - [DJC10_HUMAN]                                                                           | 1,42 | 1,14 | -    | 1,28 |
| Dolichyl-diphosphooligosaccharide--protein glycosyltransferase 48 kDa subunit OS=Homo sapiens GN=DDOST PE=1 SV=4 - [OST48_HUMAN]                                  | 1,56 | 1,55 | 1,30 | 1,47 |
| Dolichyl-diphosphooligosaccharide--protein glycosyltransferase subunit 1 OS=Homo sapiens GN=RPN1 PE=1 SV=1 - [RPN1_HUMAN]                                         | 1,13 | 1,17 | 1,11 | 1,14 |
| Dolichyl-diphosphooligosaccharide--protein glycosyltransferase subunit 2 OS=Homo sapiens GN=RPN2 PE=1 SV=3 - [RPN2_HUMAN]                                         | 1,08 | 1,24 | 1,21 | 1,18 |
| Dolichyl-diphosphooligosaccharide--protein glycosyltransferase subunit STT3A OS=Homo sapiens GN=STT3A PE=1 SV=2 - [STT3A_HUMAN]                                   | 1,07 | 1,10 | 1,05 | 1,07 |
| Dolichyl-diphosphooligosaccharide--protein glycosyltransferase subunit STT3B OS=Homo sapiens GN=STT3B PE=1 SV=1 - [STT3B_HUMAN]                                   | -    | -    | 1,77 | 1,77 |
| Double-stranded RNA-specific adenosine deaminase OS=Homo sapiens GN=ADAR PE=1 SV=4 - [DSRAD_HUMAN]                                                                | 0,59 | -    | -    | 0,59 |
| Drebrin OS=Homo sapiens GN=DBN1 PE=1 SV=4 - [DREB_HUMAN]                                                                                                          | 1,17 | 1,10 | 1,18 | 1,15 |
| Drebrin-like protein OS=Homo sapiens GN=DBNL PE=1 SV=1 - [DBNL_HUMAN]                                                                                             | 2,84 | 0,91 | 0,95 | 1,57 |
| Dynactin subunit 1 OS=Homo sapiens GN=DCTN1 PE=1 SV=3 - [DCTN1_HUMAN]                                                                                             | 0,94 | 1,16 | 0,81 | 0,97 |
| Dynactin subunit 2 OS=Homo sapiens GN=DCTN2 PE=1 SV=4 - [DCTN2_HUMAN]                                                                                             | -    | -    | 1,91 | 1,91 |
| Dynamamin-1-like protein OS=Homo sapiens GN=DNM1L PE=1 SV=2 - [DNM1L_HUMAN]                                                                                       | 1,10 | 0,55 | -    | 0,82 |
| Dynamamin-2 OS=Homo sapiens GN=DNM2 PE=1 SV=2 - [DYN2_HUMAN]                                                                                                      | 2,53 | -    | 0,63 | 1,58 |
| Dynamamin-binding protein OS=Homo sapiens GN=DNMBP PE=1 SV=1 - [DNMBP_HUMAN]                                                                                      | -    | -    | 1,46 | 1,46 |
| Dysferlin OS=Homo sapiens GN=DYSF PE=1 SV=1 - [DYSF_HUMAN]                                                                                                        | 1,14 | 1,19 | 1,63 | 1,32 |
| Dystonin OS=Homo sapiens GN=DST PE=1 SV=4 - [DYST_HUMAN]                                                                                                          | 1,03 | -    | -    | 1,03 |
| E3 SUMO-protein ligase RanBP2 OS=Homo sapiens GN=RANBP2 PE=1 SV=2 - [RBP2_HUMAN]                                                                                  | -    | -    | 1,02 | 1,02 |
| E3 ubiquitin/ISG15 ligase TRIM25 OS=Homo sapiens GN=TRIM25 PE=1 SV=2 - [TRI25_HUMAN]                                                                              | -    | 1,00 | 1,29 | 1,14 |
| E3 ubiquitin-protein ligase HUWE1 OS=Homo sapiens GN=HUWE1 PE=1 SV=3 - [HUWE1_HUMAN]                                                                              | 2,16 | 0,61 | 2,14 | 1,64 |
| E3 ubiquitin-protein ligase MYLIP OS=Homo sapiens GN=MYLIP PE=1 SV=2 - [MYLIP_HUMAN]                                                                              | 0,63 | -    | -    | 0,63 |
| E3 ubiquitin-protein ligase UBR4 OS=Homo sapiens GN=UBR4 PE=1 SV=1 - [UBR4_HUMAN]                                                                                 | 1,72 | 3,22 | -    | 2,47 |
| Early endosome antigen 1 OS=Homo sapiens GN=EEA1 PE=1 SV=2 - [EEA1_HUMAN]                                                                                         | 1,08 | 1,08 | 0,97 | 1,04 |
| Ectopic P granules protein 5 homolog OS=Homo sapiens GN=EPG5 PE=2 SV=2 - [EPG5_HUMAN]                                                                             | -    | 1,63 | -    | 1,63 |
| EH domain-containing protein 1 OS=Homo sapiens GN=EHD1 PE=1 SV=2 - [EHD1_HUMAN]                                                                                   | 5,18 | -    | -    | 5,18 |
| Electron transfer flavoprotein subunit alpha, mitochondrial OS=Homo sapiens GN=ETFFA PE=1 SV=1 - [ETFFA_HUMAN]                                                    | 1,30 | -    | -    | 1,30 |
| Elongation factor 1-alpha 1 OS=Homo sapiens GN=EEF1A1 PE=1 SV=1 - [EF1A1_HUMAN]                                                                                   | 1,55 | 1,35 | 1,28 | 1,39 |
| Elongation factor 1-beta OS=Homo sapiens GN=EEF1B2 PE=1 SV=3 - [EF1B_HUMAN]                                                                                       | 2,27 | 1,44 | 1,76 | 1,82 |
| Elongation factor 1-delta OS=Homo sapiens GN=EEF1D PE=1 SV=5 - [EF1D_HUMAN]                                                                                       | 0,69 | 1,11 | 0,89 | 0,90 |

|                                                                                                                          |      |      |      |      |
|--------------------------------------------------------------------------------------------------------------------------|------|------|------|------|
| Elongation factor 1-gamma OS=Homo sapiens GN=EEF1G PE=1 SV=3 - [EF1G_HUMAN]                                              | 0,97 | 1,00 | 0,87 | 0,95 |
| Elongation factor 2 OS=Homo sapiens GN=EEF2 PE=1 SV=4 - [EF2_HUMAN]                                                      | 0,92 | 1,03 | 0,97 | 0,97 |
| Elongation factor Tu GTP-binding domain-containing protein 1 OS=Homo sapiens GN=EFTUD1 PE=1 SV=2 - [ETUD1_HUMAN]         | 0,23 | -    | -    | 0,23 |
| Elongation factor Tu, mitochondrial OS=Homo sapiens GN=TUFM PE=1 SV=2 - [EFTU_HUMAN]                                     | 0,83 | 0,80 | -    | 0,82 |
| Endoplasmic reticulum aminopeptidase 1 OS=Homo sapiens GN=ERAP1 PE=1 SV=3 - [ERAP1_HUMAN]                                | 2,48 | 1,65 | 1,93 | 2,02 |
| Endoplasmic reticulum mannosyl-oligosaccharide 1,2-alpha-mannosidase OS=Homo sapiens GN=MAN1B1 PE=1 SV=2 - [MA1B1_HUMAN] | 0,53 | 1,80 | -    | 1,17 |
| Endoplasmic reticulum chaperone protein OS=Homo sapiens GN=HSP90B1 PE=1 SV=1 - [ENPL_HUMAN]                              | 0,92 | 0,97 | 0,90 | 0,93 |
| Endothelin-converting enzyme 1 OS=Homo sapiens GN=ECE1 PE=1 SV=2 - [ECE1_HUMAN]                                          | 1,55 | 0,95 | 1,03 | 1,18 |
| Enhancer of mRNA-decapping protein 4 OS=Homo sapiens GN=EDC4 PE=1 SV=1 - [EDC4_HUMAN]                                    | 1,36 | 0,30 | 0,78 | 0,81 |
| Enoyl-CoA hydratase, mitochondrial OS=Homo sapiens GN=ECHS1 PE=1 SV=4 - [ECHM_HUMAN]                                     | -    | 1,46 | 1,40 | 1,43 |
| Ephrin type-A receptor 2 OS=Homo sapiens GN=EPHA2 PE=1 SV=2 - [EPHA2_HUMAN]                                              | 1,02 | 0,87 | 0,73 | 0,87 |
| Epidermal growth factor receptor OS=Homo sapiens GN=EGFR PE=1 SV=2 - [EGFR_HUMAN]                                        | 1,05 | 0,70 | 0,63 | 0,79 |
| ER lumen protein retaining receptor 2 OS=Homo sapiens GN=KDELRL2 PE=1 SV=1 - [ERD22_HUMAN]                               | -    | 0,67 | -    | 0,67 |
| Erlin-2 OS=Homo sapiens GN=ERLIN2 PE=1 SV=1 - [ERLN2_HUMAN]                                                              | -    | 1,26 | 1,45 | 1,36 |
| ERO1-like protein alpha OS=Homo sapiens GN=ERO1L PE=1 SV=2 - [ERO1A_HUMAN]                                               | 1,84 | 1,20 | 0,96 | 1,34 |
| Estradiol 17-beta-dehydrogenase 12 OS=Homo sapiens GN=HSD17B12 PE=1 SV=2 - [DHB12_HUMAN]                                 | 2,06 | -    | 2,61 | 2,33 |
| Eukaryotic initiation factor 4A-1 OS=Homo sapiens GN=EIF4A1 PE=1 SV=1 - [IF4A1_HUMAN]                                    | 0,77 | 0,85 | 0,94 | 0,85 |
| Eukaryotic peptide chain release factor GTP-binding subunit ERF3A OS=Homo sapiens GN=GSPT1 PE=1 SV=1 - [ERF3A_HUMAN]     | 0,56 | 0,58 | 0,53 | 0,56 |
| Eukaryotic translation initiation factor 2 subunit 1 OS=Homo sapiens GN=EIF2S1 PE=1 SV=3 - [IF2A_HUMAN]                  | -    | 2,27 | 2,07 | 2,17 |
| Eukaryotic translation initiation factor 2 subunit 3 OS=Homo sapiens GN=EIF2S3 PE=1 SV=3 - [IF2G_HUMAN]                  | 3,20 | 3,00 | 1,14 | 2,45 |
| Eukaryotic translation initiation factor 3 subunit A OS=Homo sapiens GN=EIF3A PE=1 SV=1 - [EIF3A_HUMAN]                  | 0,87 | 0,85 | 0,82 | 0,85 |
| Eukaryotic translation initiation factor 3 subunit B OS=Homo sapiens GN=EIF3B PE=1 SV=3 - [EIF3B_HUMAN]                  | 0,85 | 0,86 | 0,50 | 0,74 |
| Eukaryotic translation initiation factor 3 subunit C OS=Homo sapiens GN=EIF3C PE=1 SV=1 - [EIF3C_HUMAN]                  | 0,90 | 1,07 | 0,82 | 0,93 |
| Eukaryotic translation initiation factor 3 subunit D OS=Homo sapiens GN=EIF3D PE=1 SV=1 - [EIF3D_HUMAN]                  | -    | 0,25 | -    | 0,25 |
| Eukaryotic translation initiation factor 3 subunit F OS=Homo sapiens GN=EIF3F PE=1 SV=1 - [EIF3F_HUMAN]                  | -    | 0,81 | 1,03 | 0,92 |
| Eukaryotic translation initiation factor 3 subunit L OS=Homo sapiens GN=EIF3L PE=1 SV=1 - [EIF3L_HUMAN]                  | 1,20 | 1,11 | -    | 1,16 |
| Eukaryotic translation initiation factor 4 gamma 1 OS=Homo sapiens GN=EIF4G1 PE=1 SV=4 - [IF4G1_HUMAN]                   | 1,25 | 0,93 | 1,11 | 1,10 |
| Eukaryotic translation initiation factor 4 gamma 2 OS=Homo sapiens GN=EIF4G2 PE=1 SV=1 - [IF4G2_HUMAN]                   | 0,41 | 0,51 | 0,32 | 0,41 |
| Eukaryotic translation initiation factor 4B OS=Homo sapiens GN=EIF4B PE=1 SV=2 - [IF4B_HUMAN]                            | 0,99 | -    | -    | 0,99 |
| Eukaryotic translation initiation factor 5A-1 OS=Homo sapiens GN=EIF5A PE=1 SV=2 - [IF5A1_HUMAN]                         | 0,83 | 0,70 | 0,89 | 0,81 |
| Eukaryotic translation initiation factor 5B OS=Homo sapiens GN=EIF5B PE=1 SV=4 - [IF2P_HUMAN]                            | 1,08 | 0,98 | 1,02 | 1,03 |
| Exocyst complex component 1 OS=Homo sapiens GN=EXOC1 PE=1 SV=4 - [EXOC1_HUMAN]                                           | 1,26 | -    | -    | 1,26 |
| Exocyst complex component 2 OS=Homo sapiens GN=EXOC2 PE=1 SV=1 - [EXOC2_HUMAN]                                           | 3,24 | -    | -    | 3,24 |
| Exocyst complex component 4 OS=Homo sapiens GN=EXOC4 PE=1 SV=1 - [EXOC4_HUMAN]                                           | 1,12 | -    | -    | 1,12 |
| Exportin-1 OS=Homo sapiens GN=XPO1 PE=1 SV=1 - [XPO1_HUMAN]                                                              | 0,62 | 0,73 | 0,69 | 0,68 |
| Exportin-2 OS=Homo sapiens GN=CSE1L PE=1 SV=3 - [XPO2_HUMAN]                                                             | 0,82 | 0,73 | 0,74 | 0,76 |
| Extended synaptotagmin-1 OS=Homo sapiens GN=ESYT1 PE=1 SV=1 - [ESYT1_HUMAN]                                              | 1,69 | 1,44 | 1,75 | 1,63 |
| Extended synaptotagmin-2 OS=Homo sapiens GN=ESYT2 PE=1 SV=1 - [ESYT2_HUMAN]                                              | -    | 0,90 | -    | 0,90 |
| Ezrin OS=Homo sapiens GN=EZR PE=1 SV=4 - [EZRI_HUMAN]                                                                    | 0,86 | 0,81 | 0,81 | 0,83 |
| FACT complex subunit SPT16 OS=Homo sapiens GN=SUPT16H PE=1 SV=1 - [SP16H_HUMAN]                                          | 0,46 | 0,93 | -    | 0,70 |
| F-actin-capping protein subunit alpha-1 OS=Homo sapiens GN=CAPZA1 PE=1 SV=3 - [CAZA1_HUMAN]                              | 0,97 | 1,16 | 0,76 | 0,96 |
| F-actin-capping protein subunit beta OS=Homo sapiens GN=CAPZB PE=1 SV=4 - [CAPZB_HUMAN]                                  | 5,44 | 1,61 | -    | 3,53 |
| Far upstream element-binding protein 2 OS=Homo sapiens GN=KHSRP PE=1 SV=4 - [FUBP2_HUMAN]                                | 1,14 | 1,08 | 1,03 | 1,08 |
| Farnesyl pyrophosphate synthase OS=Homo sapiens GN=FDPS PE=1 SV=4 - [FPFS_HUMAN]                                         | 0,93 | -    | -    | 0,93 |
| Fascin OS=Homo sapiens GN=FSCN1 PE=1 SV=3 - [FSCN1_HUMAN]                                                                | 0,77 | 0,81 | 0,77 | 0,78 |
| Fatty acid synthase OS=Homo sapiens GN=FASN PE=1 SV=3 - [FAS_HUMAN]                                                      | 1,00 | 1,05 | 1,01 | 1,02 |
| Fermitin family homolog 2 OS=Homo sapiens GN=FERMT2 PE=1 SV=1 - [FERM2_HUMAN]                                            | 0,90 | 0,81 | 0,95 | 0,89 |
| Ferritin heavy chain OS=Homo sapiens GN=FTH1 PE=1 SV=2 - [FRIH_HUMAN]                                                    | 1,15 | 1,26 | 1,19 | 1,20 |
| Ferritin light chain OS=Homo sapiens GN=FTL PE=1 SV=2 - [FRIL_HUMAN]                                                     | 1,53 | 0,88 | 1,68 | 1,36 |
| Fibronectin OS=Homo sapiens GN=FN1 PE=1 SV=4 - [FINC_HUMAN]                                                              | 1,21 | 1,05 | 0,98 | 1,08 |
| Filamin-A OS=Homo sapiens GN=FLNA PE=1 SV=4 - [FLNA_HUMAN]                                                               | 1,21 | 1,22 | 1,21 | 1,21 |
| Filamin-B OS=Homo sapiens GN=FLNB PE=1 SV=2 - [FLNB_HUMAN]                                                               | 1,04 | 1,18 | 1,03 | 1,08 |

|                                                                                                                             |      |      |      |      |
|-----------------------------------------------------------------------------------------------------------------------------|------|------|------|------|
| Filamin-C OS=Homo sapiens GN=FLNC PE=1 SV=3 - [FLNC_HUMAN]                                                                  | 1,22 | 1,25 | 1,22 | 1,23 |
| Flotillin-1 OS=Homo sapiens GN=FLOT1 PE=1 SV=3 - [FLOT1_HUMAN]                                                              | 0,79 | 0,76 | 0,94 | 0,83 |
| Fragile X mental retardation syndrome-related protein 1 OS=Homo sapiens GN=FXR1 PE=1 SV=3 - [FXR1_HUMAN]                    | -    | -    | 0,63 | 0,63 |
| Fructose-bisphosphate aldolase A OS=Homo sapiens GN=ALDOA PE=1 SV=2 - [ALDOA_HUMAN]                                         | 0,96 | 0,80 | 0,80 | 0,85 |
| Fructose-bisphosphate aldolase C OS=Homo sapiens GN=ALDOC PE=1 SV=2 - [ALDOC_HUMAN]                                         | 1,31 | 1,23 | 1,79 | 1,44 |
| Galectin-1 OS=Homo sapiens GN=LGALS1 PE=1 SV=2 - [LEG1_HUMAN]                                                               | 0,85 | 0,88 | 1,18 | 0,97 |
| Gamma-interferon-inducible protein 16 OS=Homo sapiens GN=IFI16 PE=1 SV=3 - [IFI16_HUMAN]                                    | 1,24 | -    | -    | 1,24 |
| Gap junction alpha-1 protein OS=Homo sapiens GN=GJA1 PE=1 SV=2 - [CXA1_HUMAN]                                               | -    | 0,70 | -    | 0,70 |
| Gelsolin OS=Homo sapiens GN=GSN PE=1 SV=1 - [GELS_HUMAN]                                                                    | 1,27 | 1,65 | 1,03 | 1,31 |
| General vesicular transport factor p115 OS=Homo sapiens GN=USO1 PE=1 SV=2 - [USO1_HUMAN]                                    | 0,89 | 0,91 | 0,93 | 0,91 |
| Glucose-6-phosphate 1-dehydrogenase OS=Homo sapiens GN=G6PD PE=1 SV=4 - [G6PD_HUMAN]                                        | 1,11 | 1,41 | 0,96 | 1,16 |
| Glucose-6-phosphate isomerase OS=Homo sapiens GN=GPI PE=1 SV=4 - [G6PI_HUMAN]                                               | 0,89 | 1,02 | 0,91 | 0,94 |
| Glucosidase 2 subunit beta OS=Homo sapiens GN=PRKCSH PE=1 SV=2 - [GLU2B_HUMAN]                                              | 0,89 | 0,99 | 0,82 | 0,90 |
| Glucosylceramidase OS=Homo sapiens GN=GBA PE=1 SV=3 - [GLCM_HUMAN]                                                          | 1,38 | 0,92 | -    | 1,15 |
| Glutamate dehydrogenase 1, mitochondrial OS=Homo sapiens GN=GLUD1 PE=1 SV=2 - [DHE3_HUMAN]                                  | 0,93 | 1,55 | 1,47 | 1,32 |
| Glutaminase kidney isoform, mitochondrial OS=Homo sapiens GN=GLS PE=1 SV=1 - [GLSK_HUMAN]                                   | 1,17 | 0,76 | 0,68 | 0,87 |
| Glutamine--fructose-6-phosphate aminotransferase [isomerizing] 1 OS=Homo sapiens GN=GFPT1 PE=1 SV=3 - [GFPT1_HUMAN]         | 0,54 | 0,60 | 1,24 | 0,79 |
| Glutamine--tRNA ligase OS=Homo sapiens GN=QARS PE=1 SV=1 - [SYQ_HUMAN]                                                      | 2,22 | 1,45 | 1,53 | 1,73 |
| Glutathione S-transferase omega-1 OS=Homo sapiens GN=GSTO1 PE=1 SV=2 - [GSTO1_HUMAN]                                        | 0,96 | 1,24 | 0,83 | 1,01 |
| Glutathione S-transferase P OS=Homo sapiens GN=GSTP1 PE=1 SV=2 - [GSTP1_HUMAN]                                              | 1,14 | 1,40 | 1,25 | 1,26 |
| Glyceraldehyde-3-phosphate dehydrogenase OS=Homo sapiens GN=GAPDH PE=1 SV=3 - [G3P_HUMAN]                                   | 0,92 | 1,08 | 0,93 | 0,98 |
| Glycine--tRNA ligase OS=Homo sapiens GN=GARS PE=1 SV=3 - [SYG_HUMAN]                                                        | 0,77 | 0,76 | 0,94 | 0,82 |
| Glycogen phosphorylase, brain form OS=Homo sapiens GN=PYGB PE=1 SV=5 - [PYGB_HUMAN]                                         | 1,24 | 0,99 | 1,01 | 1,08 |
| Glycogen phosphorylase, liver form OS=Homo sapiens GN=PYGL PE=1 SV=4 - [PYGL_HUMAN]                                         | 1,60 | 1,28 | 2,60 | 1,83 |
| Golgi apparatus protein 1 OS=Homo sapiens GN=GLG1 PE=1 SV=2 - [GSLG1_HUMAN]                                                 | 1,03 | 0,88 | 0,98 | 0,96 |
| Golgi reassembly-stacking protein 2 OS=Homo sapiens GN=GORASP2 PE=1 SV=3 - [GORS2_HUMAN]                                    | 1,12 | -    | -    | 1,12 |
| Golgi resident protein GCP60 OS=Homo sapiens GN=ACBD3 PE=1 SV=4 - [GCP60_HUMAN]                                             | 2,00 | 1,12 | 0,84 | 1,32 |
| Golgin subfamily A member 2 OS=Homo sapiens GN=GOLGA2 PE=1 SV=3 - [GOGA2_HUMAN]                                             | 0,50 | 0,45 | -    | 0,47 |
| Golgi-specific brefeldin A-resistance guanine nucleotide exchange factor 1 OS=Homo sapiens GN=GBF1 PE=1 SV=2 - [GBF1_HUMAN] | 1,06 | 0,96 | 0,94 | 0,99 |
| Growth arrest-specific protein 6 OS=Homo sapiens GN=GAS6 PE=1 SV=2 - [GAS6_HUMAN]                                           | 1,09 | 0,89 | -    | 0,99 |
| GTP-binding nuclear protein Ran OS=Homo sapiens GN=RAN PE=1 SV=3 - [RAN_HUMAN]                                              | 1,12 | 0,78 | 1,07 | 0,99 |
| GTP-binding protein SAR1a OS=Homo sapiens GN=SAR1A PE=1 SV=1 - [SAR1A_HUMAN]                                                | -    | -    | 0,64 | 0,64 |
| Guanine nucleotide-binding protein G(i) subunit alpha-2 OS=Homo sapiens GN=GNAI2 PE=1 SV=3 - [GNAI2_HUMAN]                  | -    | 1,08 | 0,57 | 0,82 |
| Guanine nucleotide-binding protein G(I)/G(S)/G(T) subunit beta-1 OS=Homo sapiens GN=GNB1 PE=1 SV=3 - [GNB1_HUMAN]           | -    | 1,31 | -    | 1,31 |
| Guanine nucleotide-binding protein G(I)/G(S)/G(T) subunit beta-2 OS=Homo sapiens GN=GNB2 PE=1 SV=3 - [GNB2_HUMAN]           | 0,79 | -    | 0,38 | 0,58 |
| Guanine nucleotide-binding protein subunit beta-2-like 1 OS=Homo sapiens GN=GNB2L1 PE=1 SV=3 - [GNB2L1_HUMAN]               | 0,84 | 0,77 | 1,07 | 0,89 |
| Heat shock 70 kDa protein 1A/1B OS=Homo sapiens GN=HSPA1A PE=1 SV=5 - [HSP71_HUMAN]                                         | 1,92 | 0,93 | 1,61 | 1,49 |
| Heat shock 70 kDa protein 4 OS=Homo sapiens GN=HSPA4 PE=1 SV=4 - [HSP74_HUMAN]                                              | 0,99 | 1,28 | 1,04 | 1,10 |
| Heat shock 70 kDa protein 4L OS=Homo sapiens GN=HSPA4L PE=1 SV=3 - [HS74L_HUMAN]                                            | 6,79 | -    | -    | 6,79 |
| Heat shock cognate 71 kDa protein OS=Homo sapiens GN=HSPA8 PE=1 SV=1 - [HSP7C_HUMAN]                                        | 0,72 | 0,74 | 0,72 | 0,73 |
| Heat shock protein 105 kDa OS=Homo sapiens GN=HSPH1 PE=1 SV=1 - [HS105_HUMAN]                                               | 0,68 | 0,72 | 0,70 | 0,70 |
| Heat shock protein beta-1 OS=Homo sapiens GN=HSPB1 PE=1 SV=2 - [HSPB1_HUMAN]                                                | 1,57 | 0,82 | 1,30 | 1,23 |
| Heat shock protein HSP 90-alpha OS=Homo sapiens GN=HSP90AA1 PE=1 SV=5 - [HS90A_HUMAN]                                       | 0,91 | 0,83 | 0,93 | 0,89 |
| Heat shock protein HSP 90-beta OS=Homo sapiens GN=HSP90AB1 PE=1 SV=4 - [HS90B_HUMAN]                                        | 0,92 | 0,81 | 0,90 | 0,88 |
| Hepatocyte growth factor-regulated tyrosine kinase substrate OS=Homo sapiens GN=HGS PE=1 SV=1 - [HGS_HUMAN]                 | 0,99 | 1,01 | -    | 1,00 |
| Hepatoma-derived growth factor-related protein 2 OS=Homo sapiens GN=HDGFRP2 PE=1 SV=1 - [HDGR2_HUMAN]                       | -    | -    | 1,21 | 1,21 |
| Heterochromatin protein 1-binding protein 3 OS=Homo sapiens GN=HP1BP3 PE=1 SV=1 - [HP1B3_HUMAN]                             | 0,73 | -    | -    | 0,73 |
| Heterogeneous nuclear ribonucleoprotein A/B OS=Homo sapiens GN=HNRNPAB PE=1 SV=2 - [ROAA_HUMAN]                             | 0,75 | 0,88 | 1,09 | 0,91 |
| Heterogeneous nuclear ribonucleoprotein A1 OS=Homo sapiens GN=HNRNPA1 PE=1 SV=5 - [ROA1_HUMAN]                              | 0,64 | 0,67 | 0,80 | 0,71 |
| Heterogeneous nuclear ribonucleoprotein A3 OS=Homo sapiens GN=HNRNPA3 PE=1 SV=2 - [ROA3_HUMAN]                              | 0,90 | 1,07 | 0,97 | 0,98 |

|                                                                                                                                  |      |      |      |      |
|----------------------------------------------------------------------------------------------------------------------------------|------|------|------|------|
| Heterogeneous nuclear ribonucleoprotein D0 OS=Homo sapiens GN=HNRNPD PE=1 SV=1 - [HNRPD_HUMAN]                                   | 0,57 | 0,76 | 0,72 | 0,68 |
| Heterogeneous nuclear ribonucleoprotein H OS=Homo sapiens GN=HNRNPH1 PE=1 SV=4 - [HNRH1_HUMAN]                                   | 0,97 | 1,56 | 1,52 | 1,35 |
| Heterogeneous nuclear ribonucleoprotein K OS=Homo sapiens GN=HNRNPK PE=1 SV=1 - [HNRPK_HUMAN]                                    | 0,83 | 0,88 | 0,83 | 0,85 |
| Heterogeneous nuclear ribonucleoprotein L OS=Homo sapiens GN=HNRNPL PE=1 SV=2 - [HNRPL_HUMAN]                                    | 0,72 | 0,64 | 0,60 | 0,65 |
| Heterogeneous nuclear ribonucleoprotein M OS=Homo sapiens GN=HNRNPM PE=1 SV=3 - [HNRPM_HUMAN]                                    | 1,10 | 1,14 | 0,86 | 1,03 |
| Heterogeneous nuclear ribonucleoprotein Q OS=Homo sapiens GN=SYNCRIP PE=1 SV=2 - [HNRPQ_HUMAN]                                   | 0,75 | 0,76 | 0,70 | 0,74 |
| Heterogeneous nuclear ribonucleoprotein U OS=Homo sapiens GN=HNRNPU PE=1 SV=6 - [HNRPU_HUMAN]                                    | 0,71 | 0,83 | 0,78 | 0,77 |
| Heterogeneous nuclear ribonucleoprotein U-like protein 1 OS=Homo sapiens GN=HNRNPUL1 PE=1 SV=2 - [HNRL1_HUMAN]                   | -    | -    | 1,36 | 1,36 |
| Heterogeneous nuclear ribonucleoprotein U-like protein 2 OS=Homo sapiens GN=HNRNPUL2 PE=1 SV=1 - [HNRL2_HUMAN]                   | 0,52 | -    | 0,68 | 0,60 |
| Heterogeneous nuclear ribonucleoproteins A2/B1 OS=Homo sapiens GN=HNRNPA2B1 PE=1 SV=2 - [ROA2_HUMAN]                             | 0,92 | 0,84 | 0,88 | 0,88 |
| Heterogeneous nuclear ribonucleoproteins C1/C2 OS=Homo sapiens GN=HNRNPC PE=1 SV=4 - [HNRPC_HUMAN]                               | 0,70 | 0,71 | 0,75 | 0,72 |
| Hexokinase-1 OS=Homo sapiens GN=HK1 PE=1 SV=3 - [HXK1_HUMAN]                                                                     | 0,82 | 0,87 | 0,79 | 0,83 |
| Hexokinase-2 OS=Homo sapiens GN=HK2 PE=1 SV=2 - [HXK2_HUMAN]                                                                     | 0,52 | 0,57 | 1,28 | 0,79 |
| Histone H1.2 OS=Homo sapiens GN=HIST1H1C PE=1 SV=2 - [H12_HUMAN]                                                                 | 0,27 | 0,88 | 0,84 | 0,66 |
| Histone H2A type 1-H OS=Homo sapiens GN=HIST1H2AH PE=1 SV=3 - [H2A1H_HUMAN]                                                      | 0,85 | 0,87 | 0,86 | 0,86 |
| Histone H2B type 1-J OS=Homo sapiens GN=HIST1H2BJ PE=1 SV=3 - [H2B1J_HUMAN]                                                      | 0,90 | -    | -    | 0,90 |
| Histone H2B type 1-K OS=Homo sapiens GN=HIST1H2BK PE=1 SV=3 - [H2B1K_HUMAN]                                                      | 0,65 | 0,64 | 0,59 | 0,63 |
| Histone H3.1 OS=Homo sapiens GN=HIST1H3A PE=1 SV=2 - [H31_HUMAN]                                                                 | -    | 0,69 | -    | 0,69 |
| Histone H3.2 OS=Homo sapiens GN=HIST2H3A PE=1 SV=3 - [H32_HUMAN]                                                                 | 0,82 | -    | 0,84 | 0,83 |
| Histone H3.3 OS=Homo sapiens GN=H3F3A PE=1 SV=2 - [H33_HUMAN]                                                                    | 0,68 | -    | -    | 0,68 |
| Histone H4 OS=Homo sapiens GN=HIST1H4A PE=1 SV=2 - [H4_HUMAN]                                                                    | 0,73 | 0,79 | 0,62 | 0,71 |
| HLA class I histocompatibility antigen, A-2 alpha chain OS=Homo sapiens GN=HLA-A PE=1 SV=1 - [1A02_HUMAN]                        | 1,20 | 1,10 | 0,98 | 1,09 |
| Hydroxymethylglutaryl-CoA synthase, cytoplasmic OS=Homo sapiens GN=HMGS1 PE=1 SV=2 - [HMCS1_HUMAN]                               | 1,11 | -    | 0,82 | 0,97 |
| Hypoxia up-regulated protein 1 OS=Homo sapiens GN=HYOU1 PE=1 SV=1 - [HYOU1_HUMAN]                                                | 1,07 | 1,12 | 1,25 | 1,15 |
| Importin subunit alpha-3 OS=Homo sapiens GN=KPNA4 PE=1 SV=1 - [IMA3_HUMAN]                                                       | 0,60 | -    | -    | 0,60 |
| Importin subunit alpha-4 OS=Homo sapiens GN=KPNA3 PE=1 SV=2 - [IMA4_HUMAN]                                                       | 1,58 | -    | -    | 1,58 |
| Importin subunit beta-1 OS=Homo sapiens GN=KPNB1 PE=1 SV=2 - [IMB1_HUMAN]                                                        | 0,93 | 0,99 | 0,87 | 0,93 |
| Importin-11 OS=Homo sapiens GN=IPO11 PE=1 SV=1 - [IPO11_HUMAN]                                                                   | 0,89 | -    | -    | 0,89 |
| Importin-4 OS=Homo sapiens GN=IPO4 PE=1 SV=2 - [IPO4_HUMAN]                                                                      | 1,70 | 1,50 | 1,44 | 1,54 |
| Importin-5 OS=Homo sapiens GN=IPO5 PE=1 SV=4 - [IPO5_HUMAN]                                                                      | 0,91 | 0,91 | 0,83 | 0,88 |
| Importin-7 OS=Homo sapiens GN=IPO7 PE=1 SV=1 - [IPO7_HUMAN]                                                                      | 0,69 | 0,75 | 0,80 | 0,75 |
| Importin-9 OS=Homo sapiens GN=IPO9 PE=1 SV=3 - [IPO9_HUMAN]                                                                      | 1,72 | 1,31 | 1,43 | 1,49 |
| Inhibitor of nuclear factor kappa-B kinase subunit beta OS=Homo sapiens GN=IKKB PE=1 SV=1 - [IKKB_HUMAN]                         | 0,31 | -    | -    | 0,31 |
| Inorganic pyrophosphatase OS=Homo sapiens GN=PPA1 PE=1 SV=2 - [IPYR_HUMAN]                                                       | 1,01 | 2,06 | 1,73 | 1,60 |
| Inosine-5'-monophosphate dehydrogenase 2 OS=Homo sapiens GN=IMPDH2 PE=1 SV=2 - [IMDH2_HUMAN]                                     | 0,40 | -    | -    | 0,40 |
| Insulin-like growth factor-binding protein 7 OS=Homo sapiens GN=IGFBP7 PE=1 SV=1 - [IBP7_HUMAN]                                  | 0,97 | -    | -    | 0,97 |
| Integral membrane protein 2B OS=Homo sapiens GN=ITM2B PE=1 SV=1 - [ITM2B_HUMAN]                                                  | 0,67 | -    | -    | 0,67 |
| Integrin alpha-2 OS=Homo sapiens GN=ITGA2 PE=1 SV=1 - [ITA2_HUMAN]                                                               | 0,76 | 1,65 | 0,92 | 1,11 |
| Integrin alpha-3 OS=Homo sapiens GN=ITGA3 PE=1 SV=5 - [ITA3_HUMAN]                                                               | 1,01 | 1,18 | 1,09 | 1,09 |
| Integrin alpha-5 OS=Homo sapiens GN=ITGA5 PE=1 SV=2 - [ITA5_HUMAN]                                                               | 0,99 | 1,04 | 1,13 | 1,06 |
| Integrin alpha-V OS=Homo sapiens GN=ITGAV PE=1 SV=2 - [ITAV_HUMAN]                                                               | 1,08 | 0,76 | 1,05 | 0,96 |
| Integrin beta-1 OS=Homo sapiens GN=ITGB1 PE=1 SV=2 - [ITB1_HUMAN]                                                                | 0,88 | 0,88 | 0,89 | 0,89 |
| Integrin beta-5 OS=Homo sapiens GN=ITGB5 PE=1 SV=1 - [ITB5_HUMAN]                                                                | 0,98 | 1,16 | 1,01 | 1,05 |
| Interleukin enhancer-binding factor 2 OS=Homo sapiens GN=ILF2 PE=1 SV=2 - [ILF2_HUMAN]                                           | -    | 2,40 | -    | 2,40 |
| Interleukin enhancer-binding factor 3 OS=Homo sapiens GN=ILF3 PE=1 SV=3 - [ILF3_HUMAN]                                           | 0,92 | 0,97 | 0,93 | 0,94 |
| Inverted formin-2 OS=Homo sapiens GN=INF2 PE=1 SV=2 - [INF2_HUMAN]                                                               | 1,29 | 1,26 | 1,77 | 1,44 |
| Isocitrate dehydrogenase [NADP] cytoplasmic OS=Homo sapiens GN=IDH1 PE=1 SV=2 - [IDHC_HUMAN]                                     | 1,84 | 1,30 | 1,45 | 1,53 |
| Isoleucine-tRNA ligase, cytoplasmic OS=Homo sapiens GN=IARS PE=1 SV=2 - [SYIC_HUMAN]                                             | 1,12 | 1,15 | 1,05 | 1,11 |
| Isoleucine-tRNA ligase, mitochondrial OS=Homo sapiens GN=IARS2 PE=1 SV=2 - [SYIM_HUMAN]                                          | 2,04 | 1,32 | 1,88 | 1,75 |
| Junction plakoglobin OS=Homo sapiens GN=JUP PE=1 SV=3 - [PLAK_HUMAN]                                                             | 1,02 | 1,21 | 1,19 | 1,14 |
| Keratin, type I cytoskeletal 18 OS=Homo sapiens GN=KRT18 PE=1 SV=2 - [K1C18_HUMAN]                                               | 1,02 | 1,17 | 1,22 | 1,14 |
| Keratin, type II cytoskeletal 8 OS=Homo sapiens GN=KRT8 PE=1 SV=7 - [K2C8_HUMAN]                                                 | 1,15 | 1,07 | 1,19 | 1,14 |
| KH domain-containing, RNA-binding, signal transduction-associated protein 1 OS=Homo sapiens GN=KHDRBS1 PE=1 SV=1 - [KHDR1_HUMAN] | -    | -    | 0,78 | 0,78 |
| Kinectin OS=Homo sapiens GN=KTN1 PE=1 SV=1 - [KTN1_HUMAN]                                                                        | 0,77 | 0,91 | 0,71 | 0,80 |
| Kinesin-1 heavy chain OS=Homo sapiens GN=KIF5B PE=1 SV=1 - [KINH_HUMAN]                                                          | 0,85 | 0,87 | 0,86 | 0,86 |
| Lactoylglutathione lyase OS=Homo sapiens GN=GLO1 PE=1 SV=4 - [LGUL_HUMAN]                                                        | -    | 0,83 | -    | 0,83 |
| Lamin-B1 OS=Homo sapiens GN=LMNB1 PE=1 SV=2 - [LMNB1_HUMAN]                                                                      | 0,66 | 0,64 | 0,86 | 0,72 |
| Lamin-B2 OS=Homo sapiens GN=LMNB2 PE=1 SV=3 - [LMNB2_HUMAN]                                                                      | 1,09 | -    | -    | 1,09 |
| Laminin subunit beta-1 OS=Homo sapiens GN=LAMB1 PE=1 SV=2 - [LAMB1_HUMAN]                                                        | 0,96 | 0,89 | 1,53 | 1,13 |
| Laminin subunit gamma-1 OS=Homo sapiens GN=LAMC1 PE=1 SV=3 - [LAMC1_HUMAN]                                                       | 1,59 | 1,06 | 1,13 | 1,26 |
| Lanosterol synthase OS=Homo sapiens GN=LSS PE=1 SV=1 - [ERG7_HUMAN]                                                              | 1,76 | 1,29 | 1,14 | 1,40 |

|                                                                                                               |      |       |      |       |
|---------------------------------------------------------------------------------------------------------------|------|-------|------|-------|
| La-related protein 1 OS=Homo sapiens GN=LARP1 PE=1 SV=2 - [LARP1_HUMAN]                                       | 0,70 | 0,60  | -    | 0,65  |
| Large neutral amino acids transporter small subunit 1 OS=Homo sapiens GN=SLC7A5 PE=1 SV=2 - [LAT1_HUMAN]      | -    | -     | 1,06 | 1,06  |
| Large proline-rich protein BAG6 OS=Homo sapiens GN=BAG6 PE=1 SV=2 - [BAG6_HUMAN]                              | 1,57 | 5,65  | 2,23 | 3,15  |
| Leptin receptor gene-related protein OS=Homo sapiens GN=LEPROT PE=2 SV=1 - [OBRG_HUMAN]                       | 0,96 | 1,05  | 0,94 | 0,99  |
| Leucine-rich PPR motif-containing protein, mitochondrial OS=Homo sapiens GN=LRPPRC PE=1 SV=3 - [LRPPRC_HUMAN] | 0,93 | 1,09  | 1,12 | 1,05  |
| Leucine-rich repeat flightless-interacting protein 1 OS=Homo sapiens GN=LRRFIP1 PE=1 SV=2 - [LRRF1_HUMAN]     | 1,20 | 0,83  | 0,90 | 0,98  |
| Leucine-rich repeat-containing protein 47 OS=Homo sapiens GN=LRRC47 PE=1 SV=1 - [LRC47_HUMAN]                 | 2,43 | -     | -    | 2,43  |
| Leucine-rich repeat-containing protein 59 OS=Homo sapiens GN=LRRC59 PE=1 SV=1 - [LRC59_HUMAN]                 | 0,97 | -     | -    | 0,97  |
| Leucine--tRNA ligase, cytoplasmic OS=Homo sapiens GN=LARS PE=1 SV=2 - [SYLC_HUMAN]                            | 0,67 | 0,99  | 1,01 | 0,89  |
| Leucyl-cystinyl aminopeptidase OS=Homo sapiens GN=LNPEP PE=1 SV=3 - [LCAP_HUMAN]                              | 0,98 | -     | -    | 0,98  |
| Leukotriene A-4 hydrolase OS=Homo sapiens GN=LTA4H PE=1 SV=2 - [LKHA4_HUMAN]                                  | 0,94 | 2,22  | 1,25 | 1,47  |
| LIM and SH3 domain protein 1 OS=Homo sapiens GN=LASP1 PE=1 SV=2 - [LASP1_HUMAN]                               | 1,05 | 1,00  | -    | 1,02  |
| LIM domain and actin-binding protein 1 OS=Homo sapiens GN=LIMA1 PE=1 SV=1 - [LIMA1_HUMAN]                     | 1,29 | 1,17  | 1,33 | 1,26  |
| LIM domain only protein 7 OS=Homo sapiens GN=LMO7 PE=1 SV=3 - [LMO7_HUMAN]                                    | 0,89 | 0,88  | 0,94 | 0,90  |
| Lipoma-preferred partner OS=Homo sapiens GN=LPP PE=1 SV=1 - [LPP_HUMAN]                                       | 2,31 | -     | 1,82 | 2,06  |
| LisH domain-containing protein ARMC9 OS=Homo sapiens GN=ARMC9 PE=1 SV=2 - [ARMC9_HUMAN]                       | 1,30 | 1,71  | -    | 1,50  |
| L-lactate dehydrogenase A chain OS=Homo sapiens GN=LDHA PE=1 SV=2 - [LDHA_HUMAN]                              | 0,92 | 0,95  | 0,92 | 0,93  |
| L-lactate dehydrogenase B chain OS=Homo sapiens GN=LDHB PE=1 SV=2 - [LDHB_HUMAN]                              | 0,93 | 0,93  | 0,92 | 0,93  |
| Lon protease homolog, mitochondrial OS=Homo sapiens GN=LONP1 PE=1 SV=2 - [LONM_HUMAN]                         | 0,85 | 0,92  | 1,02 | 0,93  |
| Long-chain-fatty-acid-CoA ligase 4 OS=Homo sapiens GN=ACSL4 PE=1 SV=2 - [ACSL4_HUMAN]                         | 0,43 | 1,36  | -    | 0,89  |
| Low-density lipoprotein receptor OS=Homo sapiens GN=LDLR PE=1 SV=1 - [LDLR_HUMAN]                             | 1,05 | 0,70  | 1,33 | 1,03  |
| Low-density lipoprotein receptor-related protein 10 OS=Homo sapiens GN=LRP10 PE=1 SV=2 - [LRP10_HUMAN]        | 1,10 | 1,46  | 3,61 | 2,06  |
| Low-density lipoprotein receptor-related protein 12 OS=Homo sapiens GN=LRP12 PE=1 SV=1 - [LRP12_HUMAN]        | 1,37 | 1,35  | -    | 1,36  |
| Lupus La protein OS=Homo sapiens GN=SSB PE=1 SV=2 - [LA_HUMAN]                                                | -    | 1,36  | -    | 1,36  |
| Lysine--tRNA ligase OS=Homo sapiens GN=KARS PE=1 SV=3 - [SYK_HUMAN]                                           | 1,30 | 1,17  | 1,18 | 1,22  |
| Lysophospholipid acyltransferase 7 OS=Homo sapiens GN=MBOAT7 PE=1 SV=2 - [MBOAT7_HUMAN]                       | -    | 21,98 | -    | 21,98 |
| Lysosomal acid lipase/cholesteryl ester hydrolase OS=Homo sapiens GN=LIPA PE=1 SV=2 - [LICH_HUMAN]            | 2,32 | -     | -    | 2,32  |
| Lysosome membrane protein 2 OS=Homo sapiens GN=SCARB2 PE=1 SV=2 - [SCR2_HUMAN]                                | 0,92 | 0,92  | 1,20 | 1,02  |
| Lysosome-associated membrane glycoprotein 1 OS=Homo sapiens GN=LAMP1 PE=1 SV=3 - [LAMP1_HUMAN]                | 1,00 | 0,94  | 0,96 | 0,97  |
| Lysosome-associated membrane glycoprotein 2 OS=Homo sapiens GN=LAMP2 PE=1 SV=2 - [LAMP2_HUMAN]                | 0,83 | 0,90  | 0,86 | 0,86  |
| Lysyl oxidase homolog 2 OS=Homo sapiens GN=LOXL2 PE=1 SV=1 - [LOXL2_HUMAN]                                    | 1,62 | 1,20  | 1,17 | 1,33  |
| Macrophage migration inhibitory factor OS=Homo sapiens GN=MIF PE=1 SV=4 - [MIF_HUMAN]                         | 1,02 | 1,16  | 1,00 | 1,06  |
| Macrosialin OS=Homo sapiens GN=CD68 PE=1 SV=2 - [CD68_HUMAN]                                                  | -    | -     | 0,73 | 0,73  |
| Major vault protein OS=Homo sapiens GN=MVP PE=1 SV=4 - [MVP_HUMAN]                                            | 1,09 | 1,13  | 1,11 | 1,11  |
| Malate dehydrogenase, cytoplasmic OS=Homo sapiens GN=MDH1 PE=1 SV=4 - [MDHC_HUMAN]                            | 1,14 | 1,01  | 1,11 | 1,09  |
| Malate dehydrogenase, mitochondrial OS=Homo sapiens GN=MDH2 PE=1 SV=3 - [MDHM_HUMAN]                          | 1,61 | 1,81  | 1,41 | 1,61  |
| Mannosyl-oligosaccharide glucosidase OS=Homo sapiens GN=MOGS PE=1 SV=5 - [MOGS_HUMAN]                         | 1,34 | 1,25  | 1,10 | 1,23  |
| Matrin-3 OS=Homo sapiens GN=MATR3 PE=1 SV=2 - [MATR3_HUMAN]                                                   | 0,69 | 0,78  | 0,82 | 0,77  |
| Matrix metalloproteinase-14 OS=Homo sapiens GN=MMP14 PE=1 SV=3 - [MMP14_HUMAN]                                | 1,04 | 2,65  | 0,69 | 1,46  |
| Melanoma-associated antigen D2 OS=Homo sapiens GN=MAGED2 PE=1 SV=2 - [MAGD2_HUMAN]                            | -    | 3,28  | -    | 3,28  |
| Membrane cofactor protein OS=Homo sapiens GN=CD46 PE=1 SV=3 - [MCP_HUMAN]                                     | 4,45 | -     | -    | 4,45  |
| Metalloproteinase inhibitor 2 OS=Homo sapiens GN=TIMP2 PE=1 SV=2 - [TIMP2_HUMAN]                              | -    | 1,18  | -    | 1,18  |
| Metalloreductase STEAP3 OS=Homo sapiens GN=STEAP3 PE=1 SV=2 - [STEAP3_HUMAN]                                  | 0,78 | -     | 1,23 | 1,00  |
| Metallothionein-2 OS=Homo sapiens GN=MT2A PE=1 SV=1 - [MT2_HUMAN]                                             | 0,90 | 1,09  | 0,84 | 0,94  |
| Methionine--tRNA ligase, cytoplasmic OS=Homo sapiens GN=MARS PE=1 SV=2 - [SYMC_HUMAN]                         | 0,99 | 1,48  | 1,23 | 1,23  |
| Methylsterol monooxygenase 1 OS=Homo sapiens GN=MSMO1 PE=1 SV=1 - [MSMO1_HUMAN]                               | 1,39 | 2,67  | 0,91 | 1,66  |
| Microsomal glutathione S-transferase 3 OS=Homo sapiens GN=MGST3 PE=1 SV=1 - [MGST3_HUMAN]                     | 0,81 | 0,91  | -    | 0,86  |
| Microtubule-actin cross-linking factor 1, isoforms 1/2/3/5 OS=Homo sapiens GN=MACF1 PE=1 SV=4 - [MACF1_HUMAN] | 1,17 | 0,84  | 0,97 | 0,99  |
| Microtubule-associated protein 1A OS=Homo sapiens GN=MAP1A PE=1 SV=6 - [MAP1A_HUMAN]                          | 1,61 | -     | 1,40 | 1,51  |
| Microtubule-associated protein 1B OS=Homo sapiens GN=MAP1B PE=1 SV=2 - [MAP1B_HUMAN]                          | 0,68 | 0,68  | 0,70 | 0,69  |
| Microtubule-associated protein 1S OS=Homo sapiens GN=MAP1S PE=1 SV=2 - [MAP1S_HUMAN]                          | -    | 0,56  | -    | 0,56  |

|                                                                                                                              |      |      |      |      |
|------------------------------------------------------------------------------------------------------------------------------|------|------|------|------|
| Microtubule-associated protein 4 OS=Homo sapiens GN=MAP4 PE=1 SV=3 - [MAP4_HUMAN]                                            | 1,22 | 1,41 | 1,10 | 1,24 |
| Microtubule-associated proteins 1A/1B light chain 3 beta 2 OS=Homo sapiens GN=MAP1LC3B2 PE=2 SV=1 - [MP3B2_HUMAN]            | -    | -    | 1,18 | 1,18 |
| Minor histocompatibility antigen H13 OS=Homo sapiens GN=HM13 PE=1 SV=1 - [HM13_HUMAN]                                        | -    | -    | 2,33 | 2,33 |
| Mitochondrial antiviral-signaling protein OS=Homo sapiens GN=MAVS PE=1 SV=2 - [MAVS_HUMAN]                                   | 2,68 | 1,59 | -    | 2,13 |
| Mitochondrial import receptor subunit TOM70 OS=Homo sapiens GN=TOMM70A PE=1 SV=1 - [TOM70_HUMAN]                             | -    | 0,99 | 1,39 | 1,19 |
| Mitochondrial inner membrane protein OS=Homo sapiens GN=IMMT PE=1 SV=1 - [IMMT_HUMAN]                                        | 0,60 | 1,04 | 1,29 | 0,98 |
| MMS19 nucleotide excision repair protein homolog OS=Homo sapiens GN=MMS19 PE=1 SV=2 - [MMS19_HUMAN]                          | 1,08 | 1,05 | 0,99 | 1,04 |
| Moesin OS=Homo sapiens GN=MSN PE=1 SV=3 - [MOES_HUMAN]                                                                       | 0,82 | 0,83 | 0,81 | 0,82 |
| Monocarboxylate transporter 4 OS=Homo sapiens GN=SLC16A3 PE=1 SV=1 - [MOT4_HUMAN]                                            | 0,83 | 1,00 | 0,97 | 0,93 |
| Mucolipin-1 OS=Homo sapiens GN=MCOLN1 PE=1 SV=1 - [MCLN1_HUMAN]                                                              | -    | -    | 3,12 | 3,12 |
| Multifunctional protein ADE2 OS=Homo sapiens GN=PAICS PE=1 SV=3 - [PUR6_HUMAN]                                               | 0,70 | -    | 1,50 | 1,10 |
| Myb-binding protein 1A OS=Homo sapiens GN=MYBBP1A PE=1 SV=2 - [MBB1A_HUMAN]                                                  | 1,64 | 1,28 | 2,12 | 1,68 |
| Myeloid-associated differentiation marker OS=Homo sapiens GN=MYADM PE=1 SV=2 - [MYADM_HUMAN]                                 | 1,61 | 1,33 | -    | 1,47 |
| Myoferlin OS=Homo sapiens GN=MYOF PE=1 SV=1 - [MYOF_HUMAN]                                                                   | 1,12 | 1,13 | 1,08 | 1,11 |
| Myosin light chain kinase, smooth muscle OS=Homo sapiens GN=MYLK PE=1 SV=4 - [MYLK_HUMAN]                                    | -    | 0,61 | 1,21 | 0,91 |
| Myosin light polypeptide 6 OS=Homo sapiens GN=MYL6 PE=1 SV=2 - [MYL6_HUMAN]                                                  | 0,94 | 1,11 | 0,88 | 0,98 |
| Myosin regulatory light chain 12A OS=Homo sapiens GN=MYL12A PE=1 SV=2 - [ML12A_HUMAN]                                        | 1,03 | 0,96 | -    | 1,00 |
| Myosin-10 OS=Homo sapiens GN=MYH10 PE=1 SV=3 - [MYH10_HUMAN]                                                                 | 1,19 | 1,21 | 0,95 | 1,12 |
| Myosin-9 OS=Homo sapiens GN=MYH9 PE=1 SV=4 - [MYH9_HUMAN]                                                                    | 1,03 | 1,01 | 1,00 | 1,01 |
| Myristoylated alanine-rich C-kinase substrate OS=Homo sapiens GN=MARCKS PE=1 SV=4 - [MARCS_HUMAN]                            | 1,58 | 2,01 | 2,08 | 1,89 |
| Na(+)/H(+) exchange regulatory cofactor NHE-RF1 OS=Homo sapiens GN=SLC9A3R1 PE=1 SV=4 - [NHRF1_HUMAN]                        | 2,30 | -    | -    | 2,30 |
| N-acetylglucosamine-6-sulfatase OS=Homo sapiens GN=GNS PE=1 SV=3 - [GNS_HUMAN]                                               | 1,86 | 0,82 | 2,99 | 1,89 |
| N-acetyltransferase 10 OS=Homo sapiens GN=NAT10 PE=1 SV=2 - [NAT10_HUMAN]                                                    | 1,25 | -    | 2,12 | 1,69 |
| NAD(P) transhydrogenase, mitochondrial OS=Homo sapiens GN=NNT PE=1 SV=3 - [NNTM_HUMAN]                                       | 1,64 | 1,17 | 1,23 | 1,35 |
| NAD(P)H dehydrogenase [quinone] 1 OS=Homo sapiens GN=NQO1 PE=1 SV=1 - [NQO1_HUMAN]                                           | 1,70 | 2,22 | 1,26 | 1,73 |
| NADH-cytochrome b5 reductase 3 OS=Homo sapiens GN=CYB5R3 PE=1 SV=3 - [NB5R3_HUMAN]                                           | 1,22 | 1,02 | 1,16 | 1,13 |
| NADPH--cytochrome P450 reductase OS=Homo sapiens GN=POR PE=1 SV=2 - [NCPR_HUMAN]                                             | -    | 0,55 | 0,60 | 0,58 |
| N-alpha-acetyltransferase 15, NatA auxiliary subunit OS=Homo sapiens GN=NAA15 PE=1 SV=1 - [NAA15_HUMAN]                      | 0,36 | 0,97 | 0,97 | 0,76 |
| Nardilysin OS=Homo sapiens GN=NRD1 PE=1 SV=2 - [NRDC_HUMAN]                                                                  | -    | 1,53 | 0,17 | 0,85 |
| Nascent polypeptide-associated complex subunit alpha, muscle-specific form OS=Homo sapiens GN=NACA PE=1 SV=1 - [NACAM_HUMAN] | 0,73 | 0,93 | 0,87 | 0,84 |
| Nck-associated protein 1 OS=Homo sapiens GN=NCKAP1 PE=1 SV=1 - [NCKP1_HUMAN]                                                 | 1,05 | 1,48 | 0,61 | 1,05 |
| NEDD4 family-interacting protein 2 OS=Homo sapiens GN=NDFIP2 PE=1 SV=2 - [NFIP2_HUMAN]                                       | -    | -    | 1,41 | 1,41 |
| Neprilysin OS=Homo sapiens GN=MME PE=1 SV=2 - [NEP_HUMAN]                                                                    | 0,85 | 0,69 | 0,88 | 0,81 |
| Neuroblast differentiation-associated protein AHNAK OS=Homo sapiens GN=AHNAK PE=1 SV=2 - [AHNK_HUMAN]                        | 1,08 | 1,06 | 1,05 | 1,06 |
| Neurogenic locus notch homolog protein 2 OS=Homo sapiens GN=NOTCH2 PE=1 SV=3 - [NOTC2_HUMAN]                                 | 1,59 | 1,45 | 1,57 | 1,53 |
| Neuropathy target esterase OS=Homo sapiens GN=PNPLA6 PE=1 SV=2 - [PLPL6_HUMAN]                                               | 1,41 | -    | -    | 1,41 |
| Neuropilin-1 OS=Homo sapiens GN=NRP1 PE=1 SV=3 - [NRP1_HUMAN]                                                                | 0,58 | 0,73 | 0,67 | 0,66 |
| Neuroplastin OS=Homo sapiens GN=NPTN PE=1 SV=2 - [NPTN_HUMAN]                                                                | 0,91 | 1,03 | 0,96 | 0,97 |
| Neutral alpha-glucosidase AB OS=Homo sapiens GN=GANAB PE=1 SV=3 - [GANAB_HUMAN]                                              | 1,04 | 1,25 | 1,14 | 1,14 |
| Neutral amino acid transporter B(0) OS=Homo sapiens GN=SLC1A5 PE=1 SV=2 - [AAAT_HUMAN]                                       | 1,14 | 0,72 | 0,81 | 0,89 |
| Neutral cholesterol ester hydrolase 1 OS=Homo sapiens GN=NCEH1 PE=1 SV=3 - [NCEH1_HUMAN]                                     | -    | 0,87 | 0,77 | 0,82 |
| Nexilin OS=Homo sapiens GN=NEXN PE=1 SV=1 - [NEXN_HUMAN]                                                                     | 0,24 | -    | -    | 0,24 |
| Niban-like protein 1 OS=Homo sapiens GN=FAM129B PE=1 SV=3 - [NIBL1_HUMAN]                                                    | 0,93 | 0,99 | 0,90 | 0,94 |
| Nicastrin OS=Homo sapiens GN=NCSTN PE=1 SV=2 - [NICA_HUMAN]                                                                  | 0,99 | 1,11 | 0,78 | 0,96 |
| Niemann-Pick C1 protein OS=Homo sapiens GN=NPC1 PE=1 SV=2 - [NPC1_HUMAN]                                                     | 1,06 | 2,42 | 0,92 | 1,46 |
| Nodal modulator 3 OS=Homo sapiens GN=NOMO3 PE=2 SV=2 - [NOMO3_HUMAN]                                                         | 0,75 | 0,64 | 1,04 | 0,81 |
| Non-POU domain-containing octamer-binding protein OS=Homo sapiens GN=NONO PE=1 SV=4 - [NONO_HUMAN]                           | 0,90 | 0,86 | 1,36 | 1,04 |
| Nuclear factor of activated T-cells, cytoplasmic 1 OS=Homo sapiens GN=NFATC1 PE=1 SV=3 - [NFAC1_HUMAN]                       | -    | -    | 2,43 | 2,43 |
| Nuclear migration protein nudC OS=Homo sapiens GN=NUDC PE=1 SV=1 - [NUDC_HUMAN]                                              | 1,03 | 0,79 | 0,37 | 0,73 |
| Nuclear mitotic apparatus protein 1 OS=Homo sapiens GN=NUMA1 PE=1 SV=2 - [NUMA1_HUMAN]                                       | 3,34 | -    | -    | 3,34 |
| Nuclear pore complex protein Nup155 OS=Homo sapiens GN=NUP155 PE=1 SV=1 - [NU155_HUMAN]                                      | -    | 1,59 | -    | 1,59 |
| Nuclear pore complex protein Nup205 OS=Homo sapiens GN=NUP205 PE=1 SV=3 - [NU205_HUMAN]                                      | 1,32 | -    | -    | 1,32 |



|                                                                                                               |      |      |      |      |
|---------------------------------------------------------------------------------------------------------------|------|------|------|------|
| Nuclear pore complex protein Nup88 OS=Homo sapiens GN=NUP88 PE=1 SV=2 - [NUP88_HUMAN]                         | 1,39 | -    | -    | 1,39 |
| Nuclear pore complex protein Nup93 OS=Homo sapiens GN=NUP93 PE=1 SV=2 - [NUP93_HUMAN]                         | -    | 0,83 | -    | 0,83 |
| Nuclear protein localization protein 4 homolog OS=Homo sapiens GN=NPLC4 PE=1 SV=3 - [NPL4_HUMAN]              | 1,33 | -    | -    | 1,33 |
| Nuclear receptor coactivator 4 OS=Homo sapiens GN=NCOA4 PE=1 SV=1 - [NCOA4_HUMAN]                             | 1,38 | -    | 0,69 | 1,04 |
| Nuclease-sensitive element-binding protein 1 OS=Homo sapiens GN=YBX1 PE=1 SV=3 - [YBOX1_HUMAN]                | 2,21 | 1,25 | 1,85 | 1,77 |
| Nucleolar complex protein 2 homolog OS=Homo sapiens GN=NOC2L PE=1 SV=4 - [NOC2L_HUMAN]                        | 1,11 | -    | -    | 1,11 |
| Nucleolar protein 56 OS=Homo sapiens GN=NOP56 PE=1 SV=4 - [NOP56_HUMAN]                                       | -    | -    | 0,32 | 0,32 |
| Nucleolar RNA helicase 2 OS=Homo sapiens GN=DDX21 PE=1 SV=5 - [DDX21_HUMAN]                                   | 0,53 | 0,73 | 0,36 | 0,54 |
| Nucleolin OS=Homo sapiens GN=NCL PE=1 SV=3 - [NUCL_HUMAN]                                                     | 0,68 | 0,61 | 0,67 | 0,66 |
| Nucleophosmin OS=Homo sapiens GN=NPM1 PE=1 SV=2 - [NPM_HUMAN]                                                 | 0,92 | 1,14 | 1,08 | 1,04 |
| Nucleoprotein TPR OS=Homo sapiens GN=TPR PE=1 SV=3 - [TPR_HUMAN]                                              | 0,71 | 1,16 | 0,82 | 0,90 |
| Nucleoside diphosphate kinase A OS=Homo sapiens GN=NME1 PE=1 SV=1 - [NDKA_HUMAN]                              | -    | -    | 2,32 | 2,32 |
| Nucleoside diphosphate kinase B OS=Homo sapiens GN=NME2 PE=1 SV=1 - [NDKB_HUMAN]                              | 1,51 | 1,91 | -    | 1,71 |
| Nucleosome assembly protein 1-like 1 OS=Homo sapiens GN=NAP1L1 PE=1 SV=1 - [NP1L1_HUMAN]                      | 1,05 | 0,95 | 1,01 | 1,00 |
| Nucleosome assembly protein 1-like 4 OS=Homo sapiens GN=NAP1L4 PE=1 SV=1 - [NP1L4_HUMAN]                      | -    | 2,64 | 2,48 | 2,56 |
| Obg-like ATPase 1 OS=Homo sapiens GN=OLA1 PE=1 SV=2 - [OLA1_HUMAN]                                            | 0,93 | 0,96 | 1,03 | 0,97 |
| Ornithine aminotransferase, mitochondrial OS=Homo sapiens GN=OAT PE=1 SV=1 - [OAT_HUMAN]                      | 1,28 | 0,60 | 0,57 | 0,82 |
| Oxysterol-binding protein 1 OS=Homo sapiens GN=OSBP PE=1 SV=1 - [OSBP1_HUMAN]                                 | 2,23 | 1,98 | -    | 2,10 |
| Palladin OS=Homo sapiens GN=PALLD PE=1 SV=3 - [PALLD_HUMAN]                                                   | 1,48 | 2,55 | 2,11 | 2,05 |
| Paraspeckle component 1 OS=Homo sapiens GN=PSPC1 PE=1 SV=1 - [PSPC1_HUMAN]                                    | 2,82 | -    | -    | 2,82 |
| PDZ and LIM domain protein 5 OS=Homo sapiens GN=PDLIM5 PE=1 SV=5 - [PDLI5_HUMAN]                              | 1,22 | 1,18 | 0,85 | 1,08 |
| PDZ and LIM domain protein 7 OS=Homo sapiens GN=PDLIM7 PE=1 SV=1 - [PDLI7_HUMAN]                              | -    | 0,54 | -    | 0,54 |
| Peptidyl-prolyl cis-trans isomerase A OS=Homo sapiens GN=PPIA PE=1 SV=2 - [PPIA_HUMAN]                        | 0,92 | 0,90 | 0,83 | 0,88 |
| Peptidyl-prolyl cis-trans isomerase B OS=Homo sapiens GN=PPIB PE=1 SV=2 - [PPIB_HUMAN]                        | 1,21 | 1,07 | 0,91 | 1,07 |
| Peptidyl-prolyl cis-trans isomerase FKBP10 OS=Homo sapiens GN=FKBP10 PE=1 SV=1 - [FKB10_HUMAN]                | 1,79 | 1,52 | 1,79 | 1,70 |
| Peptidyl-prolyl cis-trans isomerase FKBP1A OS=Homo sapiens GN=FKBP1A PE=1 SV=2 - [FKB1A_HUMAN]                | 0,69 | 0,53 | 0,63 | 0,61 |
| Perilipin-3 OS=Homo sapiens GN=PLIN3 PE=1 SV=3 - [PLIN3_HUMAN]                                                | 1,34 | 6,18 | -    | 3,76 |
| Peroxidasin homolog OS=Homo sapiens GN=PXDN PE=1 SV=2 - [PXDN_HUMAN]                                          | 0,73 | -    | -    | 0,73 |
| Peroxiredoxin-1 OS=Homo sapiens GN=PRDX1 PE=1 SV=1 - [PRDX1_HUMAN]                                            | 0,92 | 0,87 | 0,75 | 0,84 |
| Peroxiredoxin-2 OS=Homo sapiens GN=PRDX2 PE=1 SV=5 - [PRDX2_HUMAN]                                            | 0,75 | 0,83 | 0,96 | 0,85 |
| Peroxiredoxin-6 OS=Homo sapiens GN=PRDX6 PE=1 SV=3 - [PRDX6_HUMAN]                                            | 1,28 | 2,70 | 1,71 | 1,90 |
| Peroxisomal multifunctional enzyme type 2 OS=Homo sapiens GN=HSD17B4 PE=1 SV=3 - [DHB4_HUMAN]                 | 0,75 | 0,84 | 0,94 | 0,84 |
| PERQ amino acid-rich with GYF domain-containing protein 2 OS=Homo sapiens GN=GIGYF2 PE=1 SV=1 - [PERQ2_HUMAN] | 1,32 | -    | 0,57 | 0,94 |
| Phosphate carrier protein, mitochondrial OS=Homo sapiens GN=SLC25A3 PE=1 SV=2 - [MPCP_HUMAN]                  | 1,07 | 1,12 | 0,92 | 1,04 |
| Phosphatidate phosphatase LPIN1 OS=Homo sapiens GN=LPIN1 PE=1 SV=2 - [LPIN1_HUMAN]                            | 1,14 | -    | -    | 1,14 |
| Phosphatidylethanolamine-binding protein 1 OS=Homo sapiens GN=PEBP1 PE=1 SV=3 - [PEBP1_HUMAN]                 | -    | 1,00 | -    | 1,00 |
| Phosphatidylinositol 4-kinase type 2-alpha OS=Homo sapiens GN=PI4K2A PE=1 SV=1 - [P4K2A_HUMAN]                | 1,49 | -    | -    | 1,49 |
| Phosphatidylinositol-binding clathrin assembly protein OS=Homo sapiens GN=PICALM PE=1 SV=2 - [PICAL_HUMAN]    | 1,40 | 1,24 | 0,92 | 1,19 |
| Phosphoglucosyltransferase-1 OS=Homo sapiens GN=PGM1 PE=1 SV=3 - [PGM1_HUMAN]                                 | -    | 3,83 | -    | 3,83 |
| Phosphoglucosyltransferase-2 OS=Homo sapiens GN=PGM2 PE=1 SV=4 - [PGM2_HUMAN]                                 | 2,60 | -    | -    | 2,60 |
| Phosphoglycerate kinase 1 OS=Homo sapiens GN=PGK1 PE=1 SV=3 - [PGK1_HUMAN]                                    | 1,17 | 1,13 | 1,22 | 1,18 |
| Phosphoglycerate mutase 1 OS=Homo sapiens GN=PGAM1 PE=1 SV=2 - [PGAM1_HUMAN]                                  | 1,03 | 1,15 | 1,24 | 1,14 |
| Phospholipase A-2-activating protein OS=Homo sapiens GN=PLAA PE=1 SV=2 - [PLAP_HUMAN]                         | -    | 0,47 | -    | 0,47 |
| Phospholipase D3 OS=Homo sapiens GN=PLD3 PE=1 SV=1 - [PLD3_HUMAN]                                             | 2,04 | 2,23 | 4,97 | 3,08 |
| Phostensin OS=Homo sapiens GN=PPP1R18 PE=1 SV=1 - [PPR18_HUMAN]                                               | 1,32 | 1,88 | -    | 1,60 |
| Plasma membrane calcium-transporting ATPase 1 OS=Homo sapiens GN=ATP2B1 PE=1 SV=3 - [AT2B1_HUMAN]             | 0,73 | -    | 0,78 | 0,75 |
| Plasma membrane calcium-transporting ATPase 4 OS=Homo sapiens GN=ATP2B4 PE=1 SV=2 - [AT2B4_HUMAN]             | 0,92 | 1,28 | 1,70 | 1,30 |
| Plasminogen activator inhibitor 1 OS=Homo sapiens GN=SERPINE1 PE=1 SV=1 - [PAI1_HUMAN]                        | 0,80 | 0,77 | 0,85 | 0,81 |
| Plasminogen activator inhibitor 1 RNA-binding protein OS=Homo sapiens GN=SERBP1 PE=1 SV=2 - [PAIRB_HUMAN]     | -    | 1,05 | -    | 1,05 |
| Plastin-3 OS=Homo sapiens GN=PLS3 PE=1 SV=4 - [PLST_HUMAN]                                                    | 1,22 | 1,62 | 1,39 | 1,41 |
| Plectin OS=Homo sapiens GN=PLEC PE=1 SV=3 - [PLEC_HUMAN]                                                      | 1,08 | 1,14 | 1,03 | 1,08 |
| Plexin-B2 OS=Homo sapiens GN=PLXNB2 PE=1 SV=3 - [PLXB2_HUMAN]                                                 | -    | 1,07 | 0,88 | 0,97 |
| Poly [ADP-ribose] polymerase 1 OS=Homo sapiens GN=PARP1 PE=1 SV=4 - [PARP1_HUMAN]                             | 0,23 | 1,03 | -    | 0,63 |

|                                                                                                                    |      |      |      |      |
|--------------------------------------------------------------------------------------------------------------------|------|------|------|------|
| Poly [ADP-ribose] polymerase 4 OS=Homo sapiens GN=PARP4 PE=1 SV=3 - [PARP4_HUMAN]                                  | 0,97 | 1,30 | 1,25 | 1,17 |
| Poly(rC)-binding protein 1 OS=Homo sapiens GN=PCBP1 PE=1 SV=2 - [PCBP1_HUMAN]                                      | 0,77 | 0,86 | 0,81 | 0,81 |
| Poly(rC)-binding protein 2 OS=Homo sapiens GN=PCBP2 PE=1 SV=1 - [PCBP2_HUMAN]                                      | -    | -    | 1,56 | 1,56 |
| Polyadenylate-binding protein 1 OS=Homo sapiens GN=PABPC1 PE=1 SV=2 - [PABP1_HUMAN]                                | 0,69 | 0,62 | 0,73 | 0,68 |
| Polymerase I and transcript release factor OS=Homo sapiens GN=PTRF PE=1 SV=1 - [PTRF_HUMAN]                        | -    | -    | 1,20 | 1,20 |
| Polypeptide N-acetylgalactosaminyltransferase 2 OS=Homo sapiens GN=GALNT2 PE=1 SV=1 - [GALNT2_HUMAN]               | 0,93 | 1,14 | 1,34 | 1,14 |
| Polypyrimidine tract-binding protein 1 OS=Homo sapiens GN=PTBP1 PE=1 SV=1 - [PTBP1_HUMAN]                          | 1,09 | 0,95 | 1,21 | 1,08 |
| Polyubiquitin-C OS=Homo sapiens GN=UBC PE=1 SV=3 - [UBC_HUMAN]                                                     | 0,93 | 0,91 | 1,10 | 0,98 |
| POTE ankyrin domain family member E OS=Homo sapiens GN=POTEE PE=1 SV=3 - [POTEE_HUMAN]                             | 1,17 | -    | 1,45 | 1,31 |
| PRA1 family protein 3 OS=Homo sapiens GN=ARL6IP5 PE=1 SV=1 - [PRAF3_HUMAN]                                         | 1,56 | 1,28 | -    | 1,42 |
| Pre-B-cell leukemia transcription factor-interacting protein 1 OS=Homo sapiens GN=PBXIP1 PE=1 SV=1 - [PBIP1_HUMAN] | -    | -    | 1,43 | 1,43 |
| Prelamin-A/C OS=Homo sapiens GN=LMNA PE=1 SV=1 - [LMNA_HUMAN]                                                      | 0,86 | 0,90 | 0,87 | 0,88 |
| Pre-mRNA-processing-splicing factor 8 OS=Homo sapiens GN=PRPF8 PE=1 SV=2 - [PRP8_HUMAN]                            | 0,80 | 0,62 | -    | 0,71 |
| Presequence protease, mitochondrial OS=Homo sapiens GN=PITRM1 PE=1 SV=3 - [PREP_HUMAN]                             | 1,36 | 2,18 | 2,57 | 2,04 |
| PRKC apoptosis WT1 regulator protein OS=Homo sapiens GN=PAWR PE=1 SV=1 - [PAWR_HUMAN]                              | 0,90 | 1,41 | -    | 1,15 |
| Probable ATP-dependent RNA helicase DDX17 OS=Homo sapiens GN=DDX17 PE=1 SV=2 - [DDX17_HUMAN]                       | 1,91 | 1,13 | 1,01 | 1,35 |
| Probable ATP-dependent RNA helicase DDX46 OS=Homo sapiens GN=DDX46 PE=1 SV=2 - [DDX46_HUMAN]                       | 2,93 | 0,67 | -    | 1,80 |
| Probable ATP-dependent RNA helicase DDX5 OS=Homo sapiens GN=DDX5 PE=1 SV=1 - [DDX5_HUMAN]                          | 0,13 | 0,74 | 0,49 | 0,45 |
| Probable ATP-dependent RNA helicase DDX58 OS=Homo sapiens GN=DDX58 PE=1 SV=2 - [DDX58_HUMAN]                       | -    | 1,13 | -    | 1,13 |
| Probable ATP-dependent RNA helicase DHX36 OS=Homo sapiens GN=DHX36 PE=1 SV=2 - [DHX36_HUMAN]                       | 1,08 | -    | -    | 1,08 |
| Probable cation-transporting ATPase 13A1 OS=Homo sapiens GN=ATP13A1 PE=1 SV=2 - [AT131_HUMAN]                      | -    | 0,74 | -    | 0,74 |
| Probable E3 ubiquitin-protein ligase HERC4 OS=Homo sapiens GN=HERC4 PE=1 SV=1 - [HERC4_HUMAN]                      | 0,89 | 1,94 | 1,34 | 1,39 |
| Probable fructose-2,6-bisphosphatase TIGAR OS=Homo sapiens GN=TIGAR PE=1 SV=1 - [TIGAR_HUMAN]                      | 1,49 | -    | -    | 1,49 |
| Probable phospholipid-transporting ATPase IC OS=Homo sapiens GN=ATP8B1 PE=1 SV=3 - [AT8B1_HUMAN]                   | -    | 1,23 | 1,45 | 1,34 |
| Probable ubiquitin carboxyl-terminal hydrolase FAF-X OS=Homo sapiens GN=USP9X PE=1 SV=3 - [USP9X_HUMAN]            | 0,84 | 0,89 | 0,92 | 0,88 |
| Procollagen galactosyltransferase 1 OS=Homo sapiens GN=COLGALT1 PE=1 SV=1 - [GT251_HUMAN]                          | -    | -    | 1,15 | 1,15 |
| Procollagen-lysine,2-oxoglutarate 5-dioxygenase 1 OS=Homo sapiens GN=PLOD1 PE=1 SV=2 - [PLOD1_HUMAN]               | 1,09 | 0,93 | 1,54 | 1,19 |
| Procollagen-lysine,2-oxoglutarate 5-dioxygenase 2 OS=Homo sapiens GN=PLOD2 PE=1 SV=2 - [PLOD2_HUMAN]               | 0,68 | 0,65 | 0,84 | 0,72 |
| Procollagen-lysine,2-oxoglutarate 5-dioxygenase 3 OS=Homo sapiens GN=PLOD3 PE=1 SV=1 - [PLOD3_HUMAN]               | -    | 0,54 | 0,84 | 0,69 |
| Profilin-1 OS=Homo sapiens GN=PFN1 PE=1 SV=2 - [PROF1_HUMAN]                                                       | 0,83 | 0,88 | 0,87 | 0,86 |
| Profilin-2 OS=Homo sapiens GN=PFN2 PE=1 SV=3 - [PROF2_HUMAN]                                                       | 1,70 | -    | -    | 1,70 |
| Programmed cell death 6-interacting protein OS=Homo sapiens GN=PDCC6IP PE=1 SV=1 - [PDC6I_HUMAN]                   | 0,67 | 0,71 | 0,64 | 0,67 |
| Prohibitin-2 OS=Homo sapiens GN=PHB2 PE=1 SV=2 - [PHB2_HUMAN]                                                      | -    | 0,42 | -    | 0,42 |
| Proliferating cell nuclear antigen OS=Homo sapiens GN=PCNA PE=1 SV=1 - [PCNA_HUMAN]                                | 0,52 | 0,66 | 0,60 | 0,59 |
| Proliferation-associated protein 2G4 OS=Homo sapiens GN=PA2G4 PE=1 SV=3 - [PA2G4_HUMAN]                            | 0,97 | 0,89 | 1,03 | 0,96 |
| Prolow-density lipoprotein receptor-related protein 1 OS=Homo sapiens GN=LRP1 PE=1 SV=2 - [LRP1_HUMAN]             | 1,07 | 0,88 | 0,94 | 0,96 |
| Prolyl 3-hydroxylase 1 OS=Homo sapiens GN=LEPRE1 PE=1 SV=2 - [P3H1_HUMAN]                                          | 0,87 | 0,81 | 1,68 | 1,12 |
| Prolyl 3-hydroxylase 3 OS=Homo sapiens GN=LEPREL2 PE=1 SV=1 - [P3H3_HUMAN]                                         | 0,79 | 1,81 | -    | 1,30 |
| Prosaposin OS=Homo sapiens GN=PSAP PE=1 SV=2 - [SAP_HUMAN]                                                         | 0,99 | 1,11 | 1,10 | 1,07 |
| Proteasome activator complex subunit 2 OS=Homo sapiens GN=PSME2 PE=1 SV=4 - [PSME2_HUMAN]                          | 0,97 | 1,89 | -    | 1,43 |
| Proteasome subunit alpha type-2 OS=Homo sapiens GN=PSMA2 PE=1 SV=2 - [PSA2_HUMAN]                                  | 0,68 | -    | 1,21 | 0,95 |
| Proteasome subunit alpha type-3 OS=Homo sapiens GN=PSMA3 PE=1 SV=2 - [PSA3_HUMAN]                                  | -    | -    | 1,69 | 1,69 |
| Proteasome subunit alpha type-4 OS=Homo sapiens GN=PSMA4 PE=1 SV=1 - [PSA4_HUMAN]                                  | -    | 1,72 | -    | 1,72 |
| Proteasome subunit alpha type-5 OS=Homo sapiens GN=PSMA5 PE=1 SV=3 - [PSA5_HUMAN]                                  | -    | -    | 1,78 | 1,78 |
| Proteasome subunit alpha type-6 OS=Homo sapiens GN=PSMA6 PE=1 SV=1 - [PSA6_HUMAN]                                  | 1,28 | -    | 1,35 | 1,31 |
| Proteasome subunit beta type-2 OS=Homo sapiens GN=PSMB2 PE=1 SV=1 - [PSB2_HUMAN]                                   | 1,69 | 2,26 | 1,69 | 1,88 |
| Proteasome subunit beta type-4 OS=Homo sapiens GN=PSMB4 PE=1 SV=4 - [PSB4_HUMAN]                                   | -    | 1,47 | -    | 1,47 |

|                                                                                                                       |      |      |      |      |
|-----------------------------------------------------------------------------------------------------------------------|------|------|------|------|
| Proteasome-associated protein ECM29 homolog OS=Homo sapiens GN=ECM29 PE=1 SV=2 - [ECM29_HUMAN]                        | 1,59 | 1,17 | 0,69 | 1,15 |
| Protein AHNK2 OS=Homo sapiens GN=AHNAK2 PE=1 SV=2 - [AHNK2_HUMAN]                                                     | 1,28 | 1,20 | 1,26 | 1,25 |
| Protein CutA OS=Homo sapiens GN=CUTA PE=1 SV=2 - [CUTA_HUMAN]                                                         | -    | 1,88 | 1,63 | 1,76 |
| Protein CYR61 OS=Homo sapiens GN=CYR61 PE=1 SV=1 - [CYR61_HUMAN]                                                      | 0,80 | 0,92 | 0,71 | 0,81 |
| Protein DEK OS=Homo sapiens GN=DEK PE=1 SV=1 - [DEK_HUMAN]                                                            | -    | 0,75 | -    | 0,75 |
| Protein diaphanous homolog 1 OS=Homo sapiens GN=DIAPH1 PE=1 SV=2 - [DIAP1_HUMAN]                                      | -    | 1,13 | -    | 1,13 |
| Protein disulfide-isomerase A3 OS=Homo sapiens GN=PDIA3 PE=1 SV=4 - [PDIA3_HUMAN]                                     | 1,00 | 1,04 | 0,92 | 0,99 |
| Protein disulfide-isomerase A4 OS=Homo sapiens GN=PDIA4 PE=1 SV=2 - [PDIA4_HUMAN]                                     | 0,87 | 1,00 | 0,87 | 0,91 |
| Protein disulfide-isomerase A6 OS=Homo sapiens GN=PDIA6 PE=1 SV=1 - [PDIA6_HUMAN]                                     | 1,53 | 1,42 | 1,07 | 1,34 |
| Protein disulfide-isomerase OS=Homo sapiens GN=P4HB PE=1 SV=3 - [PDIA1_HUMAN]                                         | 0,92 | 0,97 | 1,04 | 0,98 |
| Protein DJ-1 OS=Homo sapiens GN=PARK7 PE=1 SV=2 - [PARK7_HUMAN]                                                       | 1,73 | -    | -    | 1,73 |
| Protein enabled homolog OS=Homo sapiens GN=ENAH PE=1 SV=2 - [ENAH_HUMAN]                                              | -    | -    | 4,67 | 4,67 |
| Protein flightless-1 homolog OS=Homo sapiens GN=FLII PE=1 SV=2 - [FLII_HUMAN]                                         | 1,14 | 1,24 | 0,87 | 1,09 |
| Protein NOXP20 OS=Homo sapiens GN=FAM114A1 PE=1 SV=2 - [NXP20_HUMAN]                                                  | 0,67 | 0,69 | 0,68 | 0,68 |
| Protein phosphatase 1 regulatory subunit 12A OS=Homo sapiens GN=PPP1R12A PE=1 SV=1 - [MYPT1_HUMAN]                    | 0,70 | 0,62 | 0,75 | 0,69 |
| Protein S100-A11 OS=Homo sapiens GN=S100A11 PE=1 SV=2 - [S10AB_HUMAN]                                                 | 1,87 | 0,58 | 3,43 | 1,96 |
| Protein S100-A6 OS=Homo sapiens GN=S100A6 PE=1 SV=1 - [S10A6_HUMAN]                                                   | 0,72 | 0,82 | 0,84 | 0,79 |
| Protein SET OS=Homo sapiens GN=SET PE=1 SV=3 - [SET_HUMAN]                                                            | -    | 1,76 | 0,77 | 1,27 |
| Protein transport protein Sec16A OS=Homo sapiens GN=SEC16A PE=1 SV=3 - [SC16A_HUMAN]                                  | -    | -    | 5,35 | 5,35 |
| Protein transport protein Sec23A OS=Homo sapiens GN=SEC23A PE=1 SV=2 - [SC23A_HUMAN]                                  | 0,70 | 0,96 | 0,19 | 0,62 |
| Protein transport protein Sec23B OS=Homo sapiens GN=SEC23B PE=1 SV=2 - [SC23B_HUMAN]                                  | 3,09 | -    | 2,59 | 2,84 |
| Protein transport protein Sec24B OS=Homo sapiens GN=SEC24B PE=1 SV=2 - [SC24B_HUMAN]                                  | 0,86 | -    | -    | 0,86 |
| Protein transport protein Sec24C OS=Homo sapiens GN=SEC24C PE=1 SV=3 - [SC24C_HUMAN]                                  | 1,62 | 2,39 | 1,38 | 1,79 |
| Protein transport protein Sec31A OS=Homo sapiens GN=SEC31A PE=1 SV=3 - [SC31A_HUMAN]                                  | 0,94 | 0,90 | 0,84 | 0,89 |
| Protein transport protein Sec61 subunit alpha isoform 1 OS=Homo sapiens GN=SEC61A1 PE=1 SV=2 - [S61A1_HUMAN]          | 2,22 | 1,51 | 2,07 | 1,93 |
| Protein unc-45 homolog A OS=Homo sapiens GN=UNC45A PE=1 SV=1 - [UN45A_HUMAN]                                          | 2,05 | 0,80 | -    | 1,43 |
| Protein VAC14 homolog OS=Homo sapiens GN=VAC14 PE=1 SV=1 - [VAC14_HUMAN]                                              | 0,75 | 1,37 | 1,38 | 1,17 |
| Protein-glutamine gamma-glutamyltransferase 2 OS=Homo sapiens GN=TGM2 PE=1 SV=2 - [TGM2_HUMAN]                        | 1,25 | 1,20 | 1,25 | 1,23 |
| Prothrombin OS=Homo sapiens GN=F2 PE=1 SV=2 - [THR_B_HUMAN]                                                           | 3,36 | -    | -    | 3,36 |
| Purine nucleoside phosphorylase OS=Homo sapiens GN=PNP PE=1 SV=2 - [PNPH_HUMAN]                                       | 0,90 | -    | -    | 0,90 |
| Puromycin-sensitive aminopeptidase OS=Homo sapiens GN=NPEPPS PE=1 SV=2 - [PSA_HUMAN]                                  | 0,91 | 0,97 | 0,98 | 0,96 |
| Putative ATP-dependent RNA helicase DHX30 OS=Homo sapiens GN=DHX30 PE=1 SV=1 - [DHX30_HUMAN]                          | -    | 1,37 | -    | 1,37 |
| Putative heat shock protein HSP 90-beta 4 OS=Homo sapiens GN=HSP90AB4P PE=5 SV=1 - [H90B4_HUMAN]                      | 0,73 | -    | 0,54 | 0,63 |
| Putative pre-mRNA-splicing factor ATP-dependent RNA helicase DHX15 OS=Homo sapiens GN=DHX15 PE=1 SV=2 - [DHX15_HUMAN] | 0,52 | 0,35 | 0,53 | 0,47 |
| Putative protein FAM10A4 OS=Homo sapiens GN=ST13P4 PE=5 SV=1 - [ST134_HUMAN]                                          | -    | 2,16 | 1,63 | 1,89 |
| Putative ribosomal RNA methyltransferase NOP2 OS=Homo sapiens GN=NOP2 PE=1 SV=2 - [NOP2_HUMAN]                        | 1,16 | -    | -    | 1,16 |
| Pyridoxal kinase OS=Homo sapiens GN=PDXX PE=1 SV=1 - [PDXX_HUMAN]                                                     | -    | -    | 5,80 | 5,80 |
| Pyruvate kinase PKM OS=Homo sapiens GN=PKM PE=1 SV=4 - [KPYM_HUMAN]                                                   | 0,88 | 0,99 | 1,02 | 0,97 |
| Rab GDP dissociation inhibitor alpha OS=Homo sapiens GN=GDI1 PE=1 SV=2 - [GDIA_HUMAN]                                 | -    | -    | 1,64 | 1,64 |
| Rab GDP dissociation inhibitor beta OS=Homo sapiens GN=GDI2 PE=1 SV=2 - [GDIB_HUMAN]                                  | 0,84 | 1,32 | 1,13 | 1,10 |
| Rab3 GTPase-activating protein catalytic subunit OS=Homo sapiens GN=RAB3GAP1 PE=1 SV=3 - [RB3GP_HUMAN]                | -    | 1,35 | -    | 1,35 |
| Rab3 GTPase-activating protein non-catalytic subunit OS=Homo sapiens GN=RAB3GAP2 PE=1 SV=1 - [RBGPR_HUMAN]            | -    | -    | 1,23 | 1,23 |
| Radixin OS=Homo sapiens GN=RDX PE=1 SV=1 - [RADI_HUMAN]                                                               | -    | 1,45 | 2,10 | 1,77 |
| Raftlin OS=Homo sapiens GN=RFTN1 PE=1 SV=4 - [RFTN1_HUMAN]                                                            | -    | 4,50 | -    | 4,50 |
| Ran GTPase-activating protein 1 OS=Homo sapiens GN=RANGAP1 PE=1 SV=1 - [RAGP1_HUMAN]                                  | 1,82 | 0,88 | 0,56 | 1,09 |
| Rap1 GTPase-GDP dissociation stimulator 1 OS=Homo sapiens GN=RAP1GDS1 PE=1 SV=3 - [GDS1_HUMAN]                        | -    | 0,84 | 0,73 | 0,78 |
| Ras GTPase-activating protein-binding protein 1 OS=Homo sapiens GN=G3BP1 PE=1 SV=1 - [G3BP1_HUMAN]                    | 1,56 | 0,94 | 1,16 | 1,22 |
| Ras GTPase-activating-like protein IQGAP1 OS=Homo sapiens GN=IQGAP1 PE=1 SV=1 - [IQGA1_HUMAN]                         | 0,91 | 0,94 | 0,93 | 0,92 |
| Ras-related protein Rab-10 OS=Homo sapiens GN=RAB10 PE=1 SV=1 - [RAB10_HUMAN]                                         | 0,43 | 0,71 | -    | 0,57 |
| Ras-related protein Rab-11A OS=Homo sapiens GN=RAB11A PE=1 SV=3 - [RB11A_HUMAN]                                       | 1,15 | 1,19 | 0,96 | 1,10 |
| Ras-related protein Rab-14 OS=Homo sapiens GN=RAB14 PE=1 SV=4 - [RAB14_HUMAN]                                         | 0,53 | -    | -    | 0,53 |
| Ras-related protein Rab-1B OS=Homo sapiens GN=RAB1B PE=1 SV=1 - [RAB1B_HUMAN]                                         | 2,23 | -    | -    | 2,23 |
| Ras-related protein Rab-5C OS=Homo sapiens GN=RAB5C PE=1 SV=2 - [RAB5C_HUMAN]                                         | 1,48 | 0,94 | 1,15 | 1,19 |
| Ras-related protein Rab-7a OS=Homo sapiens GN=RAB7A PE=1 SV=1 - [RAB7A_HUMAN]                                         | 1,10 | 1,33 | 0,82 | 1,09 |
| Ras-related protein Rap-1b-like protein OS=Homo sapiens GN=RP1BL PE=2 SV=1 - [RP1BL_HUMAN]                            | 1,68 | -    | 1,44 | 1,56 |
| Ras-related protein R-Ras2 OS=Homo sapiens GN=RRAS2 PE=1 SV=1 - [RRAS2_HUMAN]                                         | 1,40 | 2,73 | 0,84 | 1,66 |
| Regulator of nonsense transcripts 1 OS=Homo sapiens GN=UPF1 PE=1 SV=2 - [RENT1_HUMAN]                                 | 1,39 | 1,56 | 1,22 | 1,39 |
| Reticulocalbin-1 OS=Homo sapiens GN=RCN1 PE=1 SV=1 - [RCN1_HUMAN]                                                     | -    | 0,82 | -    | 0,82 |

|                                                                                                                                       |      |      |      |      |
|---------------------------------------------------------------------------------------------------------------------------------------|------|------|------|------|
| Reticulon-4 OS=Homo sapiens GN=RTN4 PE=1 SV=2 - [RTN4_HUMAN]                                                                          | 0,90 | 0,70 | 0,70 | 0,77 |
| Rho GDP-dissociation inhibitor 1 OS=Homo sapiens GN=ARHGDI1 PE=1 SV=3 - [GDIR1_HUMAN]                                                 | 9,46 | 2,35 | 1,96 | 4,59 |
| Rho GTPase-activating protein 18 OS=Homo sapiens GN=ARHGAP18 PE=1 SV=3 - [RHG18_HUMAN]                                                | 1,19 | 1,12 | 0,85 | 1,05 |
| Rho-related GTP-binding protein RhoC OS=Homo sapiens GN=RHOC PE=1 SV=1 - [RHOC_HUMAN]                                                 | -    | 2,55 | -    | 2,55 |
| Ribonuclease inhibitor OS=Homo sapiens GN=RNH1 PE=1 SV=2 - [RINI_HUMAN]                                                               | 1,02 | 1,26 | 1,10 | 1,13 |
| Ribonucleoside-diphosphate reductase large subunit OS=Homo sapiens GN=RRM1 PE=1 SV=1 - [RIR1_HUMAN]                                   | 0,43 | 1,03 | -    | 0,73 |
| Ribose-phosphate pyrophosphokinase 1 OS=Homo sapiens GN=PRPS1 PE=1 SV=2 - [PRPS1_HUMAN]                                               | 0,48 | -    | 0,59 | 0,53 |
| Ribosomal L1 domain-containing protein 1 OS=Homo sapiens GN=RSL1D1 PE=1 SV=3 - [RL1D1_HUMAN]                                          | -    | -    | 0,60 | 0,60 |
| Ribosome biogenesis protein BOP1 OS=Homo sapiens GN=BOP1 PE=1 SV=2 - [BOP1_HUMAN]                                                     | 2,00 | 3,56 | -    | 2,78 |
| Ribosome-binding protein 1 OS=Homo sapiens GN=RRBP1 PE=1 SV=4 - [RRBP1_HUMAN]                                                         | 1,01 | 1,03 | 0,93 | 0,99 |
| RNA binding motif protein, X-linked-like-1 OS=Homo sapiens GN=RBMXL1 PE=1 SV=1 - [RMLX1_HUMAN]                                        | -    | 0,70 | -    | 0,70 |
| RNA-binding protein 14 OS=Homo sapiens GN=RBM14 PE=1 SV=2 - [RBM14_HUMAN]                                                             | 1,44 | 1,66 | 1,53 | 1,54 |
| RNA-binding protein EWS OS=Homo sapiens GN=EWSR1 PE=1 SV=1 - [EWS_HUMAN]                                                              | 1,20 | 0,92 | 1,14 | 1,09 |
| RNA-binding protein FUS OS=Homo sapiens GN=FUS PE=1 SV=1 - [FUS_HUMAN]                                                                | -    | 1,76 | 1,53 | 1,64 |
| RRP12-like protein OS=Homo sapiens GN=RRP12 PE=1 SV=2 - [RRP12_HUMAN]                                                                 | 1,28 | 1,06 | 1,16 | 1,17 |
| RuvB-like 1 OS=Homo sapiens GN=RUVBL1 PE=1 SV=1 - [RUVB1_HUMAN]                                                                       | -    | -    | 0,76 | 0,76 |
| Sarcoplasmic/endoplasmic reticulum calcium ATPase 2 OS=Homo sapiens GN=ATP2A2 PE=1 SV=1 - [AT2A2_HUMAN]                               | 0,79 | 0,86 | 0,94 | 0,86 |
| Scaffold attachment factor B1 OS=Homo sapiens GN=SAFB PE=1 SV=4 - [SAFB1_HUMAN]                                                       | 0,28 | 0,57 | 1,38 | 0,74 |
| Scavenger receptor class B member 1 OS=Homo sapiens GN=SCARB1 PE=1 SV=1 - [SCRB1_HUMAN]                                               | -    | 0,85 | -    | 0,85 |
| SEC23-interacting protein OS=Homo sapiens GN=SEC23IP PE=1 SV=1 - [S23IP_HUMAN]                                                        | 0,87 | 0,93 | 0,62 | 0,81 |
| Secernin-1 OS=Homo sapiens GN=SCRN1 PE=1 SV=2 - [SCRN1_HUMAN]                                                                         | 1,32 | -    | 5,18 | 3,25 |
| Secreted frizzled-related protein 1 OS=Homo sapiens GN=SFRP1 PE=1 SV=1 - [SFRP1_HUMAN]                                                | -    | 1,01 | -    | 1,01 |
| Secretory carrier-associated membrane protein 3 OS=Homo sapiens GN=SCAMP3 PE=1 SV=3 - [SCAM3_HUMAN]                                   | 1,24 | -    | -    | 1,24 |
| Secretory carrier-associated membrane protein 4 OS=Homo sapiens GN=SCAMP4 PE=2 SV=1 - [SCAM4_HUMAN]                                   | -    | 1,02 | 0,83 | 0,92 |
| Semaphorin-3C OS=Homo sapiens GN=SEMA3C PE=1 SV=2 - [SEM3C_HUMAN]                                                                     | -    | 0,45 | -    | 0,45 |
| Semaphorin-7A OS=Homo sapiens GN=SEMA7A PE=1 SV=1 - [SEM7A_HUMAN]                                                                     | 4,06 | 0,72 | 0,51 | 1,76 |
| Seprase OS=Homo sapiens GN=FAP PE=1 SV=5 - [SEPR_HUMAN]                                                                               | -    | 1,33 | 1,06 | 1,20 |
| Septin-11 OS=Homo sapiens GN=SEPT11 PE=1 SV=3 - [SEP11_HUMAN]                                                                         | -    | 1,80 | -    | 1,80 |
| Septin-2 OS=Homo sapiens GN=SEPT2 PE=1 SV=1 - [SEPT2_HUMAN]                                                                           | 1,51 | -    | -    | 1,51 |
| Septin-9 OS=Homo sapiens GN=SEPT9 PE=1 SV=2 - [SEPT9_HUMAN]                                                                           | 1,17 | 1,17 | 1,20 | 1,18 |
| Sequestosome-1 OS=Homo sapiens GN=SQSTM1 PE=1 SV=1 - [SQSTM_HUMAN]                                                                    | 0,93 | 0,99 | 1,32 | 1,08 |
| Serglycin OS=Homo sapiens GN=SRGN PE=1 SV=3 - [SRGN_HUMAN]                                                                            | 0,83 | 0,87 | -    | 0,85 |
| Serine beta-lactamase-like protein LACTB, mitochondrial OS=Homo sapiens GN=LACTB PE=1 SV=2 - [LACTB_HUMAN]                            | 0,51 | 0,64 | 0,68 | 0,61 |
| Serine hydroxymethyltransferase, mitochondrial OS=Homo sapiens GN=SHMT2 PE=1 SV=3 - [GLYM_HUMAN]                                      | -    | 0,40 | 0,38 | 0,39 |
| Serine incorporator 1 OS=Homo sapiens GN=SERIC1 PE=1 SV=1 - [SERC1_HUMAN]                                                             | -    | 0,82 | 0,59 | 0,71 |
| Serine/threonine-protein phosphatase 2A 55 kDa regulatory subunit B alpha isoform OS=Homo sapiens GN=PPP2R2A PE=1 SV=1 - [2ABA_HUMAN] | 0,82 | 0,61 | -    | 0,71 |
| Serine/threonine-protein phosphatase 2A 65 kDa regulatory subunit A alpha isoform OS=Homo sapiens GN=PPP2R1A PE=1 SV=4 - [2AAA_HUMAN] | 1,06 | 0,96 | 1,18 | 1,06 |
| Serine/threonine-protein phosphatase PP1-gamma catalytic subunit OS=Homo sapiens GN=PPP1CC PE=1 SV=1 - [PP1G_HUMAN]                   | -    | 1,52 | -    | 1,52 |
| Serine-threonine kinase receptor-associated protein OS=Homo sapiens GN=STRAP PE=1 SV=1 - [STRAP_HUMAN]                                | -    | -    | 1,48 | 1,48 |
| Serine-tRNA ligase, cytoplasmic OS=Homo sapiens GN=SARS PE=1 SV=3 - [SYSC_HUMAN]                                                      | 0,88 | 1,22 | 0,99 | 1,03 |
| Serpin H1 OS=Homo sapiens GN=SERPINH1 PE=1 SV=2 - [SERPH_HUMAN]                                                                       | 1,20 | 1,05 | 1,01 | 1,09 |
| Serrate RNA effector molecule homolog OS=Homo sapiens GN=SRRT PE=1 SV=1 - [SRRT_HUMAN]                                                | 0,83 | 0,82 | -    | 0,82 |
| S-formylglutathione hydrolase OS=Homo sapiens GN=ESD PE=1 SV=2 - [ESTD_HUMAN]                                                         | -    | 1,68 | -    | 1,68 |
| SH3 domain-binding glutamic acid-rich-like protein 3 OS=Homo sapiens GN=SH3BGL3 PE=1 SV=1 - [SH3L3_HUMAN]                             | -    | 0,24 | -    | 0,24 |
| Signal recognition particle 14 kDa protein OS=Homo sapiens GN=SRP14 PE=1 SV=2 - [SRP14_HUMAN]                                         | 1,41 | 0,82 | 1,32 | 1,18 |
| Signal recognition particle subunit SRP72 OS=Homo sapiens GN=SRP72 PE=1 SV=3 - [SRP72_HUMAN]                                          | 1,13 | 1,13 | -    | 1,13 |
| Signal transducer and activator of transcription 1-alpha/beta OS=Homo sapiens GN=STAT1 PE=1 SV=2 - [STAT1_HUMAN]                      | 0,70 | 1,07 | 1,06 | 0,94 |
| Signal transducer and activator of transcription 2 OS=Homo sapiens GN=STAT2 PE=1 SV=1 - [STAT2_HUMAN]                                 | -    | 1,45 | -    | 1,45 |
| Signal transducer and activator of transcription 3 OS=Homo sapiens GN=STAT3 PE=1 SV=2 - [STAT3_HUMAN]                                 | 1,63 | 0,54 | -    | 1,09 |
| Signal transducer and activator of transcription 6 OS=Homo sapiens GN=STAT6 PE=1 SV=1 - [STAT6_HUMAN]                                 | 1,42 | -    | -    | 1,42 |
| Signal-induced proliferation-associated protein 1 OS=Homo sapiens GN=SIPA1 PE=1 SV=1 - [SIPA1_HUMAN]                                  | -    | 0,88 | -    | 0,88 |
| SLIT-ROBO Rho GTPase-activating protein 1 OS=Homo sapiens GN=SRGAP1 PE=1 SV=1 - [SRGP1_HUMAN]                                         | 1,06 | 1,69 | 1,75 | 1,50 |

|                                                                                                                      |      |      |      |      |
|----------------------------------------------------------------------------------------------------------------------|------|------|------|------|
| Small ubiquitin-related modifier 2 OS=Homo sapiens GN=SUMO2 PE=1 SV=3 - [SUMO2_HUMAN]                                | 0,66 | -    | 0,58 | 0,62 |
| Sodium bicarbonate cotransporter 3 OS=Homo sapiens GN=SLC4A7 PE=1 SV=2 - [S4A7_HUMAN]                                | -    | 1,24 | -    | 1,24 |
| Sodium/potassium-transporting ATPase subunit alpha-1 OS=Homo sapiens GN=ATP1A1 PE=1 SV=1 - [AT1A1_HUMAN]             | 0,88 | 0,87 | 0,88 | 0,88 |
| Sodium/potassium-transporting ATPase subunit beta-3 OS=Homo sapiens GN=ATP1B3 PE=1 SV=1 - [AT1B3_HUMAN]              | -    | 1,54 | -    | 1,54 |
| Sodium-coupled neutral amino acid transporter 2 OS=Homo sapiens GN=SLC38A2 PE=1 SV=2 - [S38A2_HUMAN]                 | 1,03 | 0,76 | 0,94 | 0,91 |
| Sodium-dependent phosphate transporter 1 OS=Homo sapiens GN=SLC20A1 PE=1 SV=1 - [S20A1_HUMAN]                        | 0,65 | 0,58 | 0,69 | 0,64 |
| Solute carrier family 2, facilitated glucose transporter member 1 OS=Homo sapiens GN=SLC2A1 PE=1 SV=2 - [GTR1_HUMAN] | 1,30 | 1,11 | 1,01 | 1,14 |
| Sortilin OS=Homo sapiens GN=SORT1 PE=1 SV=3 - [SORT_HUMAN]                                                           | 1,14 | 3,23 | 1,41 | 1,93 |
| Sorting nexin-1 OS=Homo sapiens GN=SNX1 PE=1 SV=3 - [SNX1_HUMAN]                                                     | 0,95 | 0,50 | 0,60 | 0,68 |
| Spartin OS=Homo sapiens GN=SPG20 PE=1 SV=1 - [SPG20_HUMAN]                                                           | 1,32 | 0,80 | 1,24 | 1,12 |
| Spectrin alpha chain, non-erythrocytic 1 OS=Homo sapiens GN=SPTAN1 PE=1 SV=3 - [SPTN1_HUMAN]                         | 0,83 | 0,82 | 0,84 | 0,83 |
| Spectrin beta chain, non-erythrocytic 1 OS=Homo sapiens GN=SPTBN1 PE=1 SV=2 - [SPTB2_HUMAN]                          | 0,85 | 0,81 | 0,82 | 0,83 |
| Spliceosome RNA helicase DDX39B OS=Homo sapiens GN=DDX39B PE=1 SV=1 - [DX39B_HUMAN]                                  | 1,80 | 0,35 | 1,31 | 1,15 |
| Splicing factor 1 OS=Homo sapiens GN=SF1 PE=1 SV=4 - [SF01_HUMAN]                                                    | -    | 0,47 | -    | 0,47 |
| Splicing factor 3B subunit 1 OS=Homo sapiens GN=SF3B1 PE=1 SV=3 - [SF3B1_HUMAN]                                      | 0,99 | 0,87 | 0,89 | 0,92 |
| Splicing factor 3B subunit 2 OS=Homo sapiens GN=SF3B2 PE=1 SV=2 - [SF3B2_HUMAN]                                      | 1,23 | 1,30 | -    | 1,27 |
| Splicing factor 3B subunit 3 OS=Homo sapiens GN=SF3B3 PE=1 SV=4 - [SF3B3_HUMAN]                                      | 0,61 | 0,82 | 0,62 | 0,69 |
| Splicing factor, proline- and glutamine-rich OS=Homo sapiens GN=SFPQ PE=1 SV=2 - [SFPQ_HUMAN]                        | 1,23 | 0,92 | 1,20 | 1,12 |
| Squalene synthase OS=Homo sapiens GN=FDFT1 PE=1 SV=1 - [FDFT_HUMAN]                                                  | -    | 0,21 | -    | 0,21 |
| Src substrate cortactin OS=Homo sapiens GN=CTTN PE=1 SV=2 - [SRC8_HUMAN]                                             | 0,79 | 0,86 | 0,77 | 0,81 |
| Staphylococcal nuclease domain-containing protein 1 OS=Homo sapiens GN=SND1 PE=1 SV=1 - [SND1_HUMAN]                 | 1,10 | 1,03 | 0,85 | 0,99 |
| Stathmin OS=Homo sapiens GN=STMN1 PE=1 SV=3 - [STMN1_HUMAN]                                                          | -    | 0,40 | -    | 0,40 |
| Stress-70 protein, mitochondrial OS=Homo sapiens GN=HSPA9 PE=1 SV=2 - [GRP75_HUMAN]                                  | 0,88 | 0,91 | 0,88 | 0,89 |
| Stress-induced-phosphoprotein 1 OS=Homo sapiens GN=STIP1 PE=1 SV=1 - [STIP1_HUMAN]                                   | 0,76 | 0,95 | 0,59 | 0,76 |
| Structural maintenance of chromosomes protein 3 OS=Homo sapiens GN=SMC3 PE=1 SV=2 - [SMC3_HUMAN]                     | 0,44 | 0,53 | -    | 0,49 |
| Sulfhydryl oxidase 1 OS=Homo sapiens GN=QSOX1 PE=1 SV=3 - [QSOX1_HUMAN]                                              | 1,00 | -    | -    | 1,00 |
| Superoxide dismutase [Mn], mitochondrial OS=Homo sapiens GN=SOD2 PE=1 SV=2 - [SODM_HUMAN]                            | 1,59 | 1,32 | 1,12 | 1,34 |
| Surfeit locus protein 4 OS=Homo sapiens GN=SURF4 PE=1 SV=3 - [SURF4_HUMAN]                                           | 0,77 | 0,80 | 0,89 | 0,82 |
| SURP and G-patch domain-containing protein 2 OS=Homo sapiens GN=SUGP2 PE=1 SV=2 - [SUGP2_HUMAN]                      | 0,72 | 0,60 | -    | 0,66 |
| Synaptic vesicle membrane protein VAT-1 homolog OS=Homo sapiens GN=VAT1 PE=1 SV=2 - [VAT1_HUMAN]                     | 1,19 | 2,49 | 1,39 | 1,69 |
| Syndecan-1 OS=Homo sapiens GN=SDC1 PE=1 SV=3 - [SDC1_HUMAN]                                                          | 0,80 | 1,07 | 0,83 | 0,90 |
| Talin-1 OS=Homo sapiens GN=TLN1 PE=1 SV=3 - [TLN1_HUMAN]                                                             | 0,95 | 0,95 | 0,94 | 0,94 |
| Target of Myb protein 1 OS=Homo sapiens GN=TOM1 PE=1 SV=2 - [TOM1_HUMAN]                                             | 1,30 | 1,54 | 1,00 | 1,28 |
| T-box brain protein 1 OS=Homo sapiens GN=TBR1 PE=1 SV=1 - [TBR1_HUMAN]                                               | 0,40 | -    | 0,73 | 0,56 |
| T-complex protein 1 subunit alpha OS=Homo sapiens GN=TCP1 PE=1 SV=1 - [TCPA_HUMAN]                                   | 1,05 | 1,18 | 1,01 | 1,08 |
| T-complex protein 1 subunit beta OS=Homo sapiens GN=CCT2 PE=1 SV=4 - [TCPB_HUMAN]                                    | 0,92 | 0,78 | 0,77 | 0,82 |
| T-complex protein 1 subunit delta OS=Homo sapiens GN=CCT4 PE=1 SV=4 - [TCPD_HUMAN]                                   | 0,99 | 0,85 | 0,75 | 0,86 |
| T-complex protein 1 subunit epsilon OS=Homo sapiens GN=CCT5 PE=1 SV=1 - [TCPE_HUMAN]                                 | 0,69 | 0,69 | 1,15 | 0,84 |
| T-complex protein 1 subunit eta OS=Homo sapiens GN=CCT7 PE=1 SV=2 - [TCPH_HUMAN]                                     | 1,05 | 1,26 | 1,07 | 1,13 |
| T-complex protein 1 subunit gamma OS=Homo sapiens GN=CCT3 PE=1 SV=4 - [TCPG_HUMAN]                                   | 1,20 | 0,91 | 1,06 | 1,06 |
| T-complex protein 1 subunit theta OS=Homo sapiens GN=CCT8 PE=1 SV=4 - [TCPQ_HUMAN]                                   | 0,93 | 0,94 | 1,11 | 0,99 |
| T-complex protein 1 subunit zeta OS=Homo sapiens GN=CCT6A PE=1 SV=3 - [TCPZ_HUMAN]                                   | 1,20 | 0,96 | 0,77 | 0,98 |
| Tensin-3 OS=Homo sapiens GN=TNS3 PE=1 SV=2 - [TENS3_HUMAN]                                                           | 0,82 | 0,96 | 1,41 | 1,07 |
| Tetraspanin-3 OS=Homo sapiens GN=TSPAN3 PE=2 SV=1 - [TSN3_HUMAN]                                                     | 0,56 | 0,88 | 1,41 | 0,95 |
| Thioredoxin domain-containing protein 5 OS=Homo sapiens GN=TXNDC5 PE=1 SV=2 - [TXND5_HUMAN]                          | 1,05 | 1,06 | 1,09 | 1,07 |
| Thioredoxin reductase 1, cytoplasmic OS=Homo sapiens GN=TXNRD1 PE=1 SV=3 - [TRXR1_HUMAN]                             | 1,80 | 1,38 | 1,57 | 1,58 |
| Threonine--tRNA ligase, cytoplasmic OS=Homo sapiens GN=TARS PE=1 SV=3 - [SYTC_HUMAN]                                 | 0,86 | 0,91 | 0,82 | 0,86 |
| Thrombospondin-1 OS=Homo sapiens GN=THBS1 PE=1 SV=2 - [TSP1_HUMAN]                                                   | 0,81 | 0,86 | 0,86 | 0,84 |
| Thy-1 membrane glycoprotein OS=Homo sapiens GN=THY1 PE=1 SV=2 - [THY1_HUMAN]                                         | 1,02 | 0,76 | 0,75 | 0,84 |
| Thyroid adenoma-associated protein OS=Homo sapiens GN=THADA PE=1 SV=1 - [THADA_HUMAN]                                | -    | -    | 0,52 | 0,52 |
| Thyroid hormone receptor-associated protein 3 OS=Homo sapiens GN=THRAP3 PE=1 SV=2 - [TR150_HUMAN]                    | 0,68 | 1,08 | -    | 0,88 |
| Thyroid receptor-interacting protein 6 OS=Homo sapiens GN=TRIP6 PE=1 SV=3 - [TRIP6_HUMAN]                            | 2,38 | -    | -    | 2,38 |
| Tissue factor OS=Homo sapiens GN=F3 PE=1 SV=1 - [TF_HUMAN]                                                           | 1,07 | 0,89 | 1,23 | 1,06 |

|                                                                                                              |      |      |      |      |
|--------------------------------------------------------------------------------------------------------------|------|------|------|------|
| Transaldolase OS=Homo sapiens GN=TALDO1 PE=1 SV=2 - [TALDO_HUMAN]                                            | 1,00 | 0,96 | 0,90 | 0,95 |
| Transcription intermediary factor 1-beta OS=Homo sapiens GN=TRIM28 PE=1 SV=5 - [TIF1B_HUMAN]                 | 0,46 | 0,68 | 0,39 | 0,51 |
| Transferrin receptor protein 1 OS=Homo sapiens GN=TFRC PE=1 SV=2 - [TFR1_HUMAN]                              | 0,64 | 0,68 | 0,68 | 0,67 |
| Transgelin OS=Homo sapiens GN=TAGLN PE=1 SV=4 - [TAGL_HUMAN]                                                 | 1,29 | 0,77 | 0,71 | 0,92 |
| Transgelin-2 OS=Homo sapiens GN=TAGLN2 PE=1 SV=3 - [TAGL2_HUMAN]                                             | 1,08 | 1,00 | 1,31 | 1,13 |
| Transitional endoplasmic reticulum ATPase OS=Homo sapiens GN=VCP PE=1 SV=4 - [TERA_HUMAN]                    | 1,19 | 1,15 | 1,04 | 1,12 |
| Transketolase OS=Homo sapiens GN=TKT PE=1 SV=3 - [TKT_HUMAN]                                                 | 1,07 | 0,99 | 1,06 | 1,04 |
| Translational activator GCN1 OS=Homo sapiens GN=GCN1L1 PE=1 SV=6 - [GCN1L_HUMAN]                             | 1,49 | 1,35 | 1,41 | 1,42 |
| Translocon-associated protein subunit alpha OS=Homo sapiens GN=SSR1 PE=1 SV=3 - [SSRA_HUMAN]                 | -    | 1,60 | -    | 1,60 |
| Transmembrane 9 superfamily member 3 OS=Homo sapiens GN=TM9SF3 PE=1 SV=2 - [TM9S3_HUMAN]                     | 1,52 | 1,23 | 1,37 | 1,37 |
| Transmembrane emp24 domain-containing protein 10 OS=Homo sapiens GN=TMED10 PE=1 SV=2 - [TMEDA_HUMAN]         | 0,77 | 0,88 | 0,79 | 0,81 |
| Transmembrane glycoprotein NMB OS=Homo sapiens GN=GPNMB PE=1 SV=2 - [GPNMB_HUMAN]                            | 0,84 | 0,88 | 0,81 | 0,85 |
| Transmembrane protein 106B OS=Homo sapiens GN=TMEM106B PE=1 SV=2 - [T106B_HUMAN]                             | 1,23 | 1,26 | 1,11 | 1,20 |
| Transmembrane protein 165 OS=Homo sapiens GN=TMEM165 PE=1 SV=1 - [TM165_HUMAN]                               | -    | 1,12 | 0,89 | 1,00 |
| Transportin-1 OS=Homo sapiens GN=TNPO1 PE=1 SV=2 - [TNPO1_HUMAN]                                             | 0,87 | 0,75 | 0,88 | 0,83 |
| Transportin-3 OS=Homo sapiens GN=TNPO3 PE=1 SV=3 - [TNPO3_HUMAN]                                             | 1,23 | -    | -    | 1,23 |
| Trifunctional enzyme subunit alpha, mitochondrial OS=Homo sapiens GN=HADHA PE=1 SV=2 - [ECHA_HUMAN]          | 0,85 | 1,20 | 0,95 | 1,00 |
| Trifunctional enzyme subunit beta, mitochondrial OS=Homo sapiens GN=HADHB PE=1 SV=3 - [ECHB_HUMAN]           | 1,32 | 0,92 | 0,81 | 1,02 |
| Trifunctional purine biosynthetic protein adenosine-3 OS=Homo sapiens GN=GART PE=1 SV=1 - [PUR2_HUMAN]       | 1,34 | 1,07 | 1,43 | 1,28 |
| Triosephosphate isomerase OS=Homo sapiens GN=TP11 PE=1 SV=3 - [TPIS_HUMAN]                                   | 0,82 | 1,01 | 0,97 | 0,93 |
| Tripeptidyl-peptidase 2 OS=Homo sapiens GN=TPP2 PE=1 SV=4 - [TPP2_HUMAN]                                     | 0,70 | 0,57 | 0,65 | 0,64 |
| Tropomyosin alpha-4 chain OS=Homo sapiens GN=TPM4 PE=1 SV=3 - [TPM4_HUMAN]                                   | 1,07 | 1,17 | 1,27 | 1,17 |
| Tryptophan--tRNA ligase, cytoplasmic OS=Homo sapiens GN=WARS PE=1 SV=2 - [SYWC_HUMAN]                        | -    | 2,20 | -    | 2,20 |
| Tubulin alpha-1A chain OS=Homo sapiens GN=TUBA1A PE=1 SV=1 - [TBA1A_HUMAN]                                   | 0,62 | 0,64 | 0,73 | 0,66 |
| Tubulin alpha-1B chain OS=Homo sapiens GN=TUBA1B PE=1 SV=1 - [TBA1B_HUMAN]                                   | 1,06 | 0,99 | 1,02 | 1,02 |
| Tubulin alpha-1C chain OS=Homo sapiens GN=TUBA1C PE=1 SV=1 - [TBA1C_HUMAN]                                   | 1,57 | 1,11 | 1,08 | 1,26 |
| Tubulin alpha-8 chain OS=Homo sapiens GN=TUBA8 PE=1 SV=1 - [TBA8_HUMAN]                                      | -    | 1,69 | -    | 1,69 |
| Tubulin beta chain OS=Homo sapiens GN=TUBB PE=1 SV=2 - [TBB5_HUMAN]                                          | 0,70 | 0,62 | 0,63 | 0,65 |
| Tubulin beta-2A chain OS=Homo sapiens GN=TUBB2A PE=1 SV=1 - [TBB2A_HUMAN]                                    | 2,27 | 0,84 | -    | 1,55 |
| Tubulin beta-3 chain OS=Homo sapiens GN=TUBB3 PE=1 SV=2 - [TBB3_HUMAN]                                       | 0,96 | 0,44 | 1,55 | 0,98 |
| Tubulin beta-4A chain OS=Homo sapiens GN=TUBB4A PE=1 SV=2 - [TBB4A_HUMAN]                                    | 0,49 | -    | 0,54 | 0,52 |
| Tubulin beta-4B chain OS=Homo sapiens GN=TUBB4B PE=1 SV=1 - [TBB4B_HUMAN]                                    | 0,56 | 0,59 | 0,57 | 0,57 |
| Tubulin beta-6 chain OS=Homo sapiens GN=TUBB6 PE=1 SV=1 - [TBB6_HUMAN]                                       | 1,21 | 0,90 | 1,31 | 1,14 |
| Tumor necrosis factor receptor superfamily member 10B OS=Homo sapiens GN=TNFRSF10B PE=1 SV=2 - [TR10B_HUMAN] | 0,77 | -    | -    | 0,77 |
| Tumor necrosis factor receptor superfamily member 10D OS=Homo sapiens GN=TNFRSF10D PE=1 SV=1 - [TR10D_HUMAN] | -    | 3,03 | -    | 3,03 |
| Tyrosine-protein kinase receptor UFO OS=Homo sapiens GN=AXL PE=1 SV=3 - [UFO_HUMAN]                          | 1,15 | 0,82 | 0,84 | 0,94 |
| Tyrosine--tRNA ligase, cytoplasmic OS=Homo sapiens GN=YARS PE=1 SV=4 - [SYYC_HUMAN]                          | 2,12 | -    | -    | 2,12 |
| U5 small nuclear ribonucleoprotein 200 kDa helicase OS=Homo sapiens GN=SNRNP200 PE=1 SV=2 - [U520_HUMAN]     | 0,75 | 0,92 | 0,75 | 0,81 |
| Ubiquitin carboxyl-terminal hydrolase 14 OS=Homo sapiens GN=USP14 PE=1 SV=3 - [UBP14_HUMAN]                  | 1,48 | 1,02 | 1,61 | 1,37 |
| Ubiquitin carboxyl-terminal hydrolase 5 OS=Homo sapiens GN=USP5 PE=1 SV=2 - [UBP5_HUMAN]                     | 1,17 | 1,30 | 1,54 | 1,34 |
| Ubiquitin carboxyl-terminal hydrolase isozyme L1 OS=Homo sapiens GN=UCHL1 PE=1 SV=2 - [UCHL1_HUMAN]          | 1,10 | 0,95 | 0,89 | 0,98 |
| Ubiquitin-associated protein 2-like OS=Homo sapiens GN=UBAP2L PE=1 SV=2 - [UBP2L_HUMAN]                      | 1,29 | 0,74 | -    | 1,02 |
| Ubiquitin-conjugating enzyme E2 variant 2 OS=Homo sapiens GN=UBE2V2 PE=1 SV=4 - [UB2V2_HUMAN]                | 0,93 | 1,06 | -    | 0,99 |
| Ubiquitin-like modifier-activating enzyme 1 OS=Homo sapiens GN=UBA1 PE=1 SV=3 - [UBA1_HUMAN]                 | 1,09 | 1,10 | 1,18 | 1,13 |
| UDP-glucose 6-dehydrogenase OS=Homo sapiens GN=UGDH PE=1 SV=1 - [UGDH_HUMAN]                                 | 0,63 | 1,33 | 0,92 | 0,96 |
| UDP-glucose:glycoprotein glucosyltransferase 1 OS=Homo sapiens GN=UGGT1 PE=1 SV=3 - [UGGG1_HUMAN]            | 1,04 | 1,01 | 1,05 | 1,03 |
| UDP-N-acetylhexosamine pyrophosphorylase OS=Homo sapiens GN=UAP1 PE=1 SV=3 - [UAP1_HUMAN]                    | -    | 0,49 | 0,33 | 0,41 |
| Uncharacterized protein KIAA0090 OS=Homo sapiens GN=KIAA0090 PE=1 SV=1 - [K0090_HUMAN]                       | 0,73 | 1,14 | 2,13 | 1,34 |
| Unconventional myosin-Ic OS=Homo sapiens GN=MYO1C PE=1 SV=4 - [MYO1C_HUMAN]                                  | 1,14 | 1,28 | 0,93 | 1,12 |
| Unconventional myosin-Ie OS=Homo sapiens GN=MYO1E PE=1 SV=2 - [MYO1E_HUMAN]                                  | -    | 0,46 | 1,23 | 0,85 |
| Unconventional myosin-VI OS=Homo sapiens GN=MYO6 PE=1 SV=4 - [MYO6_HUMAN]                                    | 2,04 | 1,28 | 1,00 | 1,44 |
| Unconventional myosin-XVIIIa OS=Homo sapiens GN=MYO18A PE=1 SV=3 - [MY18A_HUMAN]                             | 1,93 | -    | -    | 1,93 |
| UPF0505 protein C16orf62 OS=Homo sapiens GN=C16orf62 PE=1 SV=2 - [CP062_HUMAN]                               | 0,65 | -    | -    | 0,65 |
| UV excision repair protein RAD23 homolog B OS=Homo sapiens GN=RAD23B PE=1 SV=1 - [RD23B_HUMAN]               | 1,29 | 1,71 | 1,03 | 1,35 |

|                                                                                                                              |      |      |      |      |
|------------------------------------------------------------------------------------------------------------------------------|------|------|------|------|
| Vacuolar protein sorting-associated protein 13C OS=Homo sapiens GN=VPS13C PE=1 SV=1 - [VP13C_HUMAN]                          | -    | 3,71 | -    | 3,71 |
| Vacuolar protein sorting-associated protein 35 OS=Homo sapiens GN=VPS35 PE=1 SV=2 - [VPS35_HUMAN]                            | 1,14 | 0,97 | 0,95 | 1,02 |
| Vacuolar protein sorting-associated protein 52 homolog OS=Homo sapiens GN=VPS52 PE=1 SV=1 - [VPS52_HUMAN]                    | 5,53 | -    | -    | 5,53 |
| Valine-tRNA ligase OS=Homo sapiens GN=VARS PE=1 SV=4 - [SYVC_HUMAN]                                                          | 1,47 | 1,67 | 1,67 | 1,60 |
| Very long-chain specific acyl-CoA dehydrogenase, mitochondrial OS=Homo sapiens GN=ACADVL PE=1 SV=1 - [ACADV_HUMAN]           | 1,07 | 1,81 | 1,33 | 1,40 |
| Very-long-chain (3R)-3-hydroxyacyl-[acyl-carrier protein] dehydratase 3 OS=Homo sapiens GN=PTPLAD1 PE=1 SV=2 - [HACD3_HUMAN] | -    | 2,35 | 0,73 | 1,54 |
| Very-long-chain enoyl-CoA reductase OS=Homo sapiens GN=TECR PE=1 SV=1 - [TECR_HUMAN]                                         | 0,75 | -    | 0,67 | 0,71 |
| Vesicle transport protein GOT1B OS=Homo sapiens GN=GOLT1B PE=1 SV=1 - [GOT1B_HUMAN]                                          | 3,18 | -    | 1,80 | 2,49 |
| Vesicle-trafficking protein SEC22b OS=Homo sapiens GN=SEC22B PE=1 SV=4 - [SC22B_HUMAN]                                       | 1,04 | 1,01 | 1,05 | 1,03 |
| Vigilin OS=Homo sapiens GN=HDLBP PE=1 SV=2 - [VIGLN_HUMAN]                                                                   | 0,92 | 0,96 | 0,77 | 0,88 |
| Vimentin OS=Homo sapiens GN=VIM PE=1 SV=4 - [VIME_HUMAN]                                                                     | 0,84 | 0,88 | 0,82 | 0,85 |
| Vinculin OS=Homo sapiens GN=VCL PE=1 SV=4 - [VINC_HUMAN]                                                                     | 0,81 | 0,84 | 0,78 | 0,81 |
| Vitamin K epoxide reductase complex subunit 1 OS=Homo sapiens GN=VKORC1 PE=1 SV=1 - [VKOR1_HUMAN]                            | 0,75 | 0,75 | -    | 0,75 |
| Voltage-dependent anion-selective channel protein 1 OS=Homo sapiens GN=VDAC1 PE=1 SV=2 - [VDAC1_HUMAN]                       | 1,01 | 1,13 | 1,16 | 1,10 |
| Voltage-dependent anion-selective channel protein 2 OS=Homo sapiens GN=VDAC2 PE=1 SV=2 - [VDAC2_HUMAN]                       | 0,75 | 1,50 | 1,01 | 1,09 |
| V-type proton ATPase 116 kDa subunit a isoform 1 OS=Homo sapiens GN=ATP6V0A1 PE=2 SV=3 - [VPP1_HUMAN]                        | -    | 2,32 | -    | 2,32 |
| V-type proton ATPase catalytic subunit A OS=Homo sapiens GN=ATP6V1A PE=1 SV=2 - [VATA_HUMAN]                                 | 0,76 | 0,79 | 0,81 | 0,79 |
| V-type proton ATPase subunit B, brain isoform OS=Homo sapiens GN=ATP6V1B2 PE=1 SV=3 - [VATB2_HUMAN]                          | 0,77 | 0,45 | 1,92 | 1,05 |
| WASH complex subunit 7 OS=Homo sapiens GN=KIAA1033 PE=1 SV=2 - [WASH7_HUMAN]                                                 | 0,58 | 1,08 | -    | 0,83 |
| WASH complex subunit FAM21C OS=Homo sapiens GN=FAM21C PE=1 SV=3 - [FA21C_HUMAN]                                              | -    | 0,89 | -    | 0,89 |
| WD repeat-containing protein 1 OS=Homo sapiens GN=WDR1 PE=1 SV=4 - [WDR1_HUMAN]                                              | 1,03 | 1,03 | 1,04 | 1,03 |
| Wolframin OS=Homo sapiens GN=WFS1 PE=1 SV=2 - [WFS1_HUMAN]                                                                   | 2,08 | 0,55 | 1,19 | 1,27 |
| Xaa-Pro aminopeptidase 1 OS=Homo sapiens GN=XPNPEP1 PE=1 SV=3 - [XPP1_HUMAN]                                                 | -    | 0,83 | 1,40 | 1,12 |
| X-ray repair cross-complementing protein 5 OS=Homo sapiens GN=XRCC5 PE=1 SV=3 - [XRCC5_HUMAN]                                | 0,86 | 0,83 | 0,87 | 0,85 |
| X-ray repair cross-complementing protein 6 OS=Homo sapiens GN=XRCC6 PE=1 SV=2 - [XRCC6_HUMAN]                                | 1,15 | 1,04 | 0,95 | 1,05 |
| YLP motif-containing protein 1 OS=Homo sapiens GN=YLPM1 PE=1 SV=3 - [YLPM1_HUMAN]                                            | 1,25 | -    | -    | 1,25 |
| Zyxin OS=Homo sapiens GN=ZYX PE=1 SV=1 - [ZYX_HUMAN]                                                                         | 1,62 | 1,54 | 1,21 | 1,46 |

## B. SILAC on IGR-CaP1-Dtx-R cells.

| Full name                                                                                               | Light/Heavy Ratio 1 | Light/Heavy Ratio 2 | Light/Heavy Ratio 3 | Average |
|---------------------------------------------------------------------------------------------------------|---------------------|---------------------|---------------------|---------|
| 10 kDa heat shock protein, mitochondrial OS=Homo sapiens GN=HSPE1 PE=1 SV=2 - [CH10_HUMAN]              | 1,03                | 0,96                | 0,97                | 0,99    |
| 116 kDa U5 small nuclear ribonucleoprotein component OS=Homo sapiens GN=EFTUD2 PE=1 SV=1 - [U5S1_HUMAN] | 1,00                | 1,04                | 1,12                | 1,05    |
| 14 kDa phosphohistidine phosphatase OS=Homo sapiens GN=PHPT1 PE=1 SV=1 - [PHP14_HUMAN]                  | 0,84                | 0,93                | 0,92                | 0,90    |
| 14-3-3 protein beta/alpha OS=Homo sapiens GN=YWHAB PE=1 SV=3 - [1433B_HUMAN]                            | 0,92                | 1,06                | 1,00                | 0,99    |
| 14-3-3 protein epsilon OS=Homo sapiens GN=YWHAE PE=1 SV=1 - [1433E_HUMAN]                               | 0,94                | 1,04                | 1,05                | 1,01    |
| 14-3-3 protein eta OS=Homo sapiens GN=YWHAH PE=1 SV=4 - [1433F_HUMAN]                                   | 1,15                | 1,21                | 1,06                | 1,14    |
| 14-3-3 protein gamma OS=Homo sapiens GN=YWHAG PE=1 SV=2 - [1433G_HUMAN]                                 | 1,10                | 1,11                | 1,29                | 1,17    |
| 14-3-3 protein sigma OS=Homo sapiens GN=SFN PE=1 SV=1 - [1433S_HUMAN]                                   | 1,16                | 0,94                | 1,12                | 1,08    |
| 14-3-3 protein theta OS=Homo sapiens GN=YWHAQ PE=1 SV=1 - [1433T_HUMAN]                                 | 1,07                | 1,43                | 1,42                | 1,31    |
| 14-3-3 protein zeta/delta OS=Homo sapiens GN=YWHAZ PE=1 SV=1 - [1433Z_HUMAN]                            | 0,97                | 0,93                | 0,93                | 0,94    |
| 182 kDa tankyrase-1-binding protein OS=Homo sapiens GN=TNKS1BP1 PE=1 SV=4 - [TB182_HUMAN]               | 1,49                | 1,08                | 1,12                | 1,23    |
| 26S protease regulatory subunit 10B OS=Homo sapiens GN=PSMC6 PE=1 SV=1 - [PRS10_HUMAN]                  | 0,60                | -                   | 0,89                | 0,75    |
| 26S protease regulatory subunit 4 OS=Homo sapiens GN=PSMC1 PE=1 SV=1 - [PRS4_HUMAN]                     | 0,78                | 0,85                | 0,91                | 0,85    |
| 26S protease regulatory subunit 6A OS=Homo sapiens GN=PSMC3 PE=1 SV=3 - [PRS6A_HUMAN]                   | 1,54                | 0,86                | 0,99                | 1,13    |
| 26S protease regulatory subunit 6B OS=Homo sapiens GN=PSMC4 PE=1 SV=2 - [PRS6B_HUMAN]                   | 1,47                | 1,14                | 7,67                | 3,43    |
| 26S protease regulatory subunit 7 OS=Homo sapiens GN=PSMC2 PE=1 SV=3 - [PRS7_HUMAN]                     | 0,59                | 0,65                | 1,37                | 0,87    |
| 26S protease regulatory subunit 8 OS=Homo sapiens GN=PSMC5 PE=1 SV=1 - [PRS8_HUMAN]                     | -                   | 0,34                | -                   | 0,34    |
| 26S proteasome non-ATPase regulatory subunit 1 OS=Homo sapiens GN=PSMD1 PE=1 SV=2 - [PSMD1_HUMAN]       | 1,12                | 1,08                | 1,04                | 1,08    |
| 26S proteasome non-ATPase regulatory subunit 11 OS=Homo sapiens GN=PSMD11 PE=1 SV=3 - [PSD11_HUMAN]     | 1,05                | -                   | -                   | 1,05    |
| 26S proteasome non-ATPase regulatory subunit 12 OS=Homo sapiens GN=PSMD12 PE=1 SV=3 - [PSD12_HUMAN]     | 0,59                | -                   | 0,47                | 0,53    |

|                                                                                                       |      |      |      |      |
|-------------------------------------------------------------------------------------------------------|------|------|------|------|
| 26S proteasome non-ATPase regulatory subunit 14 OS=Homo sapiens GN=PSMD14 PE=1 SV=1 - [PSDE_HUMAN]    | -    | 2,19 | -    | 2,19 |
| 26S proteasome non-ATPase regulatory subunit 2 OS=Homo sapiens GN=PSMD2 PE=1 SV=3 - [PSMD2_HUMAN]     | 1,00 | 1,01 | 0,99 | 1,00 |
| 26S proteasome non-ATPase regulatory subunit 3 OS=Homo sapiens GN=PSMD3 PE=1 SV=2 - [PSMD3_HUMAN]     | 0,79 | 0,92 | 1,83 | 1,18 |
| 26S proteasome non-ATPase regulatory subunit 4 OS=Homo sapiens GN=PSMD4 PE=1 SV=1 - [PSMD4_HUMAN]     | 1,18 | 1,58 | -    | 1,38 |
| 26S proteasome non-ATPase regulatory subunit 7 OS=Homo sapiens GN=PSMD7 PE=1 SV=2 - [PSMD7_HUMAN]     | -    | 0,66 | -    | 0,66 |
| 26S proteasome non-ATPase regulatory subunit 8 OS=Homo sapiens GN=PSMD8 PE=1 SV=2 - [PSMD8_HUMAN]     | 0,86 | -    | -    | 0,86 |
| 2-oxoglutarate dehydrogenase, mitochondrial OS=Homo sapiens GN=OGDH PE=1 SV=3 - [ODO1_HUMAN]          | 1,13 | -    | 1,27 | 1,20 |
| 3-hydroxyacyl-CoA dehydrogenase type-2 OS=Homo sapiens GN=HSD17B10 PE=1 SV=3 - [HCD2_HUMAN]           | 1,54 | 1,13 | 1,47 | 1,38 |
| 3-hydroxyisobutyrate dehydrogenase, mitochondrial OS=Homo sapiens GN=HIBADH PE=1 SV=2 - [3HIDH_HUMAN] | 0,41 | 0,24 | -    | 0,33 |
| 40S ribosomal protein S10 OS=Homo sapiens GN=RPS10 PE=1 SV=1 - [RS10_HUMAN]                           | 1,23 | 0,80 | 0,75 | 0,92 |
| 40S ribosomal protein S11 OS=Homo sapiens GN=RPS11 PE=1 SV=3 - [RS11_HUMAN]                           | 0,83 | 0,92 | 0,94 | 0,90 |
| 40S ribosomal protein S12 OS=Homo sapiens GN=RPS12 PE=1 SV=3 - [RS12_HUMAN]                           | 0,74 | 0,86 | 0,84 | 0,81 |
| 40S ribosomal protein S13 OS=Homo sapiens GN=RPS13 PE=1 SV=2 - [RS13_HUMAN]                           | 0,82 | 0,87 | 0,88 | 0,86 |
| 40S ribosomal protein S14 OS=Homo sapiens GN=RPS14 PE=1 SV=3 - [RS14_HUMAN]                           | 1,08 | 1,18 | 1,36 | 1,20 |
| 40S ribosomal protein S15 OS=Homo sapiens GN=RPS15 PE=1 SV=2 - [RS15_HUMAN]                           | 1,40 | 1,58 | 1,12 | 1,36 |
| 40S ribosomal protein S15a OS=Homo sapiens GN=RPS15A PE=1 SV=2 - [RS15A_HUMAN]                        | 0,71 | 0,79 | 0,69 | 0,73 |
| 40S ribosomal protein S16 OS=Homo sapiens GN=RPS16 PE=1 SV=2 - [RS16_HUMAN]                           | 0,72 | 0,84 | 0,99 | 0,85 |
| 40S ribosomal protein S17-like OS=Homo sapiens GN=RPS17L PE=1 SV=1 - [RS17L_HUMAN]                    | 0,97 | 0,84 | 0,87 | 0,89 |
| 40S ribosomal protein S18 OS=Homo sapiens GN=RPS18 PE=1 SV=3 - [RS18_HUMAN]                           | 0,87 | 0,95 | 0,90 | 0,91 |
| 40S ribosomal protein S19 OS=Homo sapiens GN=RPS19 PE=1 SV=2 - [RS19_HUMAN]                           | 0,86 | 1,04 | 0,87 | 0,92 |
| 40S ribosomal protein S2 OS=Homo sapiens GN=RPS2 PE=1 SV=2 - [RS2_HUMAN]                              | 0,82 | 1,02 | 0,94 | 0,93 |
| 40S ribosomal protein S20 OS=Homo sapiens GN=RPS20 PE=1 SV=1 - [RS20_HUMAN]                           | 0,99 | 0,90 | 0,89 | 0,93 |
| 40S ribosomal protein S21 OS=Homo sapiens GN=RPS21 PE=1 SV=1 - [RS21_HUMAN]                           | 0,78 | 0,66 | 0,70 | 0,71 |
| 40S ribosomal protein S23 OS=Homo sapiens GN=RPS23 PE=1 SV=3 - [RS23_HUMAN]                           | 0,74 | 0,79 | 0,86 | 0,80 |
| 40S ribosomal protein S24 OS=Homo sapiens GN=RPS24 PE=1 SV=1 - [RS24_HUMAN]                           | 1,15 | 0,78 | 0,71 | 0,88 |
| 40S ribosomal protein S25 OS=Homo sapiens GN=RPS25 PE=1 SV=1 - [RS25_HUMAN]                           | 0,90 | 1,17 | 0,90 | 0,99 |
| 40S ribosomal protein S26 OS=Homo sapiens GN=RPS26 PE=1 SV=3 - [RS26_HUMAN]                           | 1,07 | 0,92 | -    | 1,00 |
| 40S ribosomal protein S27 OS=Homo sapiens GN=RPS27 PE=1 SV=3 - [RS27_HUMAN]                           | 0,90 | -    | 1,24 | 1,07 |
| 40S ribosomal protein S28 OS=Homo sapiens GN=RPS28 PE=1 SV=1 - [RS28_HUMAN]                           | 0,96 | 1,01 | 0,83 | 0,93 |
| 40S ribosomal protein S3 OS=Homo sapiens GN=RPS3 PE=1 SV=2 - [RS3_HUMAN]                              | 0,83 | 0,94 | 0,93 | 0,90 |
| 40S ribosomal protein S3a OS=Homo sapiens GN=RPS3A PE=1 SV=2 - [RS3A_HUMAN]                           | 0,90 | 0,81 | 0,89 | 0,87 |
| 40S ribosomal protein S4, X isoform OS=Homo sapiens GN=RPS4X PE=1 SV=2 - [RS4X_HUMAN]                 | 0,72 | 0,91 | 0,88 | 0,84 |
| 40S ribosomal protein S5 OS=Homo sapiens GN=RPS5 PE=1 SV=4 - [RS5_HUMAN]                              | 0,99 | 0,93 | 0,88 | 0,93 |
| 40S ribosomal protein S6 OS=Homo sapiens GN=RPS6 PE=1 SV=1 - [RS6_HUMAN]                              | 0,79 | -    | -    | 0,79 |
| 40S ribosomal protein S7 OS=Homo sapiens GN=RPS7 PE=1 SV=1 - [RS7_HUMAN]                              | 0,78 | 0,91 | 0,88 | 0,86 |
| 40S ribosomal protein S8 OS=Homo sapiens GN=RPS8 PE=1 SV=2 - [RS8_HUMAN]                              | 0,90 | 0,92 | 0,87 | 0,90 |
| 40S ribosomal protein S9 OS=Homo sapiens GN=RPS9 PE=1 SV=3 - [RS9_HUMAN]                              | -    | 1,01 | 1,32 | 1,16 |
| 40S ribosomal protein SA OS=Homo sapiens GN=RPSA PE=1 SV=4 - [RSSA_HUMAN]                             | 0,90 | 0,98 | 1,12 | 1,00 |
| 4-trimethylaminobutyraldehyde dehydrogenase OS=Homo sapiens GN=ALDH9A1 PE=1 SV=3 - [AL9A1_HUMAN]      | 1,30 | 1,12 | 0,83 | 1,08 |
| 5'-3' exoribonuclease 2 OS=Homo sapiens GN=XRN2 PE=1 SV=1 - [XRN2_HUMAN]                              | 1,03 | 1,07 | 1,18 | 1,10 |
| 60 kDa heat shock protein, mitochondrial OS=Homo sapiens GN=HSPD1 PE=1 SV=2 - [CH60_HUMAN]            | 0,95 | 0,95 | 0,94 | 0,95 |
| 60S acidic ribosomal protein P0 OS=Homo sapiens GN=RPLP0 PE=1 SV=1 - [RLA0_HUMAN]                     | 0,89 | 0,91 | 0,86 | 0,89 |
| 60S acidic ribosomal protein P1 OS=Homo sapiens GN=RPLP1 PE=1 SV=1 - [RLA1_HUMAN]                     | 1,28 | 1,28 | 1,10 | 1,22 |
| 60S acidic ribosomal protein P2 OS=Homo sapiens GN=RPLP2 PE=1 SV=1 - [RLA2_HUMAN]                     | 1,22 | 0,82 | -    | 1,02 |
| 60S ribosomal protein L10 OS=Homo sapiens GN=RPL10 PE=1 SV=4 - [RL10_HUMAN]                           | 0,69 | 0,72 | 0,93 | 0,78 |
| 60S ribosomal protein L10a OS=Homo sapiens GN=RPL10A PE=1 SV=2 - [RL10A_HUMAN]                        | 0,88 | 0,86 | 0,93 | 0,89 |
| 60S ribosomal protein L11 OS=Homo sapiens GN=RPL11 PE=1 SV=2 - [RL11_HUMAN]                           | -    | 0,65 | 0,67 | 0,66 |
| 60S ribosomal protein L12 OS=Homo sapiens GN=RPL12 PE=1 SV=1 - [RL12_HUMAN]                           | 0,84 | 0,91 | 0,96 | 0,90 |
| 60S ribosomal protein L13 OS=Homo sapiens GN=RPL13 PE=1 SV=4 - [RL13_HUMAN]                           | 0,77 | 0,87 | 0,65 | 0,76 |
| 60S ribosomal protein L13a OS=Homo sapiens GN=RPL13A PE=1 SV=2 - [RL13A_HUMAN]                        | 0,87 | 0,83 | 0,83 | 0,84 |
| 60S ribosomal protein L14 OS=Homo sapiens GN=RPL14 PE=1 SV=4 - [RL14_HUMAN]                           | 0,81 | 0,83 | 0,79 | 0,81 |
| 60S ribosomal protein L15 OS=Homo sapiens GN=RPL15 PE=1 SV=2 - [RL15_HUMAN]                           | -    | 0,41 | 0,63 | 0,52 |
| 60S ribosomal protein L17 OS=Homo sapiens GN=RPL17 PE=1 SV=3 - [RL17_HUMAN]                           | 0,68 | 0,65 | 1,00 | 0,78 |
| 60S ribosomal protein L18 OS=Homo sapiens GN=RPL18 PE=1 SV=2 - [RL18_HUMAN]                           | 0,96 | 0,97 | 1,03 | 0,98 |
| 60S ribosomal protein L18a OS=Homo sapiens GN=RPL18A PE=1 SV=2 - [RL18A_HUMAN]                        | 0,74 | 0,57 | 0,71 | 0,67 |
| 60S ribosomal protein L19 OS=Homo sapiens GN=RPL19 PE=1 SV=1 - [RL19_HUMAN]                           | 0,99 | -    | -    | 0,99 |
| 60S ribosomal protein L21 OS=Homo sapiens GN=RPL21 PE=1 SV=2 - [RL21_HUMAN]                           | 0,97 | 1,14 | 1,01 | 1,04 |
| 60S ribosomal protein L22-like 1 OS=Homo sapiens GN=RPL22L1 PE=1 SV=2 - [RL22L_HUMAN]                 | 1,01 | -    | 1,23 | 1,12 |
| 60S ribosomal protein L23 OS=Homo sapiens GN=RPL23 PE=1 SV=1 - [RL23_HUMAN]                           | 0,85 | 0,90 | 1,01 | 0,92 |
| 60S ribosomal protein L23a OS=Homo sapiens GN=RPL23A PE=1 SV=1 - [RL23A_HUMAN]                        | 1,87 | 0,75 | 1,01 | 1,21 |
| 60S ribosomal protein L24 OS=Homo sapiens GN=RPL24 PE=1 SV=1 - [RL24_HUMAN]                           | 0,84 | 0,94 | 0,89 | 0,89 |
| 60S ribosomal protein L26 OS=Homo sapiens GN=RPL26 PE=1 SV=1 - [RL26_HUMAN]                           | 0,88 | -    | 0,62 | 0,75 |
| 60S ribosomal protein L27 OS=Homo sapiens GN=RPL27 PE=1 SV=2 - [RL27_HUMAN]                           | 1,13 | 1,03 | 0,71 | 0,96 |
| 60S ribosomal protein L27a OS=Homo sapiens GN=RPL27A PE=1 SV=2 - [RL27A_HUMAN]                        | 1,08 | 0,91 | 0,94 | 0,98 |
| 60S ribosomal protein L28 OS=Homo sapiens GN=RPL28 PE=1 SV=3 - [RL28_HUMAN]                           | 0,79 | 1,05 | 0,86 | 0,90 |
| 60S ribosomal protein L29 OS=Homo sapiens GN=RPL29 PE=1 SV=2 - [RL29_HUMAN]                           | 1,21 | -    | -    | 1,21 |
| 60S ribosomal protein L3 OS=Homo sapiens GN=RPL3 PE=1 SV=2 - [RL3_HUMAN]                              | 0,84 | 0,86 | 0,80 | 0,83 |
| 60S ribosomal protein L30 OS=Homo sapiens GN=RPL30 PE=1 SV=2 - [RL30_HUMAN]                           | 0,90 | 0,87 | 0,79 | 0,85 |



|                                                                                                                   |      |      |      |      |
|-------------------------------------------------------------------------------------------------------------------|------|------|------|------|
| 60S ribosomal protein L31 OS=Homo sapiens GN=RPL31 PE=1 SV=1 - [RL31_HUMAN]                                       | -    | -    | 0,73 | 0,73 |
| 60S ribosomal protein L32 OS=Homo sapiens GN=RPL32 PE=1 SV=2 - [RL32_HUMAN]                                       | 0,47 | -    | -    | 0,47 |
| 60S ribosomal protein L34 OS=Homo sapiens GN=RPL34 PE=1 SV=3 - [RL34_HUMAN]                                       | 0,60 | 0,87 | 0,49 | 0,65 |
| 60S ribosomal protein L35 OS=Homo sapiens GN=RPL35 PE=1 SV=2 - [RL35_HUMAN]                                       | 1,35 | -    | 1,81 | 1,58 |
| 60S ribosomal protein L36a-like OS=Homo sapiens GN=RPL36AL PE=1 SV=3 - [RL36L_HUMAN]                              |      |      |      |      |
|                                                                                                                   | 1,05 | 0,94 | -    | 1,00 |
| 60S ribosomal protein L4 OS=Homo sapiens GN=RPL4 PE=1 SV=5 - [RL4_HUMAN]                                          | 0,77 | 0,78 | 0,75 | 0,76 |
| 60S ribosomal protein L5 OS=Homo sapiens GN=RPL5 PE=1 SV=3 - [RL5_HUMAN]                                          | 0,87 | 0,94 | 0,79 | 0,87 |
| 60S ribosomal protein L6 OS=Homo sapiens GN=RPL6 PE=1 SV=3 - [RL6_HUMAN]                                          | 0,79 | 0,82 | 0,79 | 0,80 |
| 60S ribosomal protein L7 OS=Homo sapiens GN=RPL7 PE=1 SV=1 - [RL7_HUMAN]                                          | 0,85 | 0,93 | 0,79 | 0,86 |
| 60S ribosomal protein L7a OS=Homo sapiens GN=RPL7A PE=1 SV=2 - [RL7A_HUMAN]                                       | 0,93 | 1,71 | 1,66 | 1,43 |
| 60S ribosomal protein L8 OS=Homo sapiens GN=RPL8 PE=1 SV=2 - [RL8_HUMAN]                                          | 1,07 | 0,92 | 0,80 | 0,93 |
| 60S ribosomal protein L9 OS=Homo sapiens GN=RPL9 PE=1 SV=1 - [RL9_HUMAN]                                          | 0,57 | 0,78 | 0,86 | 0,74 |
| 6-phosphofruktokinase type C OS=Homo sapiens GN=PFKP PE=1 SV=2 - [K6PP_HUMAN]                                     | -    | -    | 1,05 | 1,05 |
| 6-phosphofruktokinase, muscle type OS=Homo sapiens GN=PFKM PE=1 SV=2 - [K6PF_HUMAN]                               |      |      |      |      |
|                                                                                                                   | 1,24 | 1,15 | 1,28 | 1,22 |
| 6-phosphogluconate dehydrogenase, decarboxylating OS=Homo sapiens GN=PGD PE=1 SV=3 - [6PGD_HUMAN]                 | 1,13 | 0,97 | 1,04 | 1,05 |
| 78 kDa glucose-regulated protein OS=Homo sapiens GN=HSPA5 PE=1 SV=2 - [GRP78_HUMAN]                               |      |      |      |      |
|                                                                                                                   | 1,01 | 0,94 | 0,99 | 0,98 |
| Acetolactate synthase-like protein OS=Homo sapiens GN=ILVBL PE=1 SV=2 - [ILVBL_HUMAN]                             |      |      |      |      |
|                                                                                                                   | 1,79 | -    | -    | 1,79 |
| Acetyl-CoA acetyltransferase, mitochondrial OS=Homo sapiens GN=ACAT1 PE=1 SV=1 - [THIL_HUMAN]                     | 1,17 | -    | 1,41 | 1,29 |
| Acidic leucine-rich nuclear phosphoprotein 32 family member A OS=Homo sapiens GN=ANP32A PE=1 SV=1 - [AN32A_HUMAN] | 0,91 | 0,76 | 0,82 | 0,83 |
| Acidic leucine-rich nuclear phosphoprotein 32 family member B OS=Homo sapiens GN=ANP32B PE=1 SV=1 - [AN32B_HUMAN] | 0,93 | 0,74 | 0,83 | 0,84 |
| Acidic leucine-rich nuclear phosphoprotein 32 family member E OS=Homo sapiens GN=ANP32E PE=1 SV=1 - [AN32E_HUMAN] | 0,54 | 0,82 | 0,40 | 0,59 |
| Aconitate hydratase, mitochondrial OS=Homo sapiens GN=ACO2 PE=1 SV=2 - [ACON_HUMAN]                               |      |      |      |      |
|                                                                                                                   | 1,00 | 1,15 | 1,07 | 1,07 |
| Actin, alpha cardiac muscle 1 OS=Homo sapiens GN=ACTC1 PE=1 SV=1 - [ACTC_HUMAN]                                   | 0,91 | 1,12 | 1,15 | 1,06 |
| Actin, cytoplasmic 1 OS=Homo sapiens GN=ACTB PE=1 SV=1 - [ACTB_HUMAN]                                             | 1,14 | 1,04 | 1,21 | 1,13 |
| Actin-binding protein anillin OS=Homo sapiens GN=ANLN PE=1 SV=2 - [ANLN_HUMAN]                                    | -    | 0,52 | -    | 0,52 |
| Actin-like protein 6A OS=Homo sapiens GN=ACTL6A PE=1 SV=1 - [ACL6A_HUMAN]                                         | 0,90 | -    | -    | 0,90 |
| Actin-related protein 2 OS=Homo sapiens GN=ACTR2 PE=1 SV=1 - [ARP2_HUMAN]                                         | 1,32 | 1,24 | 2,34 | 1,63 |
| Actin-related protein 2/3 complex subunit 1B OS=Homo sapiens GN=ARPC1B PE=1 SV=3 - [ARC1B_HUMAN]                  | 0,62 | 0,57 | 0,73 | 0,64 |
| Actin-related protein 2/3 complex subunit 2 OS=Homo sapiens GN=ARPC2 PE=1 SV=1 - [ARPC2_HUMAN]                    | 1,68 | 1,69 | 1,35 | 1,58 |
| Actin-related protein 2/3 complex subunit 3 OS=Homo sapiens GN=ARPC3 PE=1 SV=3 - [ARPC3_HUMAN]                    | 0,63 | 0,60 | 0,58 | 0,60 |
| Actin-related protein 2/3 complex subunit 4 OS=Homo sapiens GN=ARPC4 PE=1 SV=3 - [ARPC4_HUMAN]                    | 1,58 | 1,53 | 1,32 | 1,48 |
| Actin-related protein 3 OS=Homo sapiens GN=ACTR3 PE=1 SV=3 - [ARP3_HUMAN]                                         | 0,89 | 0,99 | 0,85 | 0,91 |
| Activator of 90 kDa heat shock protein ATPase homolog 1 OS=Homo sapiens GN=AHSA1 PE=1 SV=1 - [AHSA1_HUMAN]        | 0,54 | 1,76 | 0,59 | 0,96 |
| Acylamino-acid-releasing enzyme OS=Homo sapiens GN=APEH PE=1 SV=4 - [ACPH_HUMAN]                                  |      |      |      |      |
|                                                                                                                   | 1,00 | 0,70 | 0,77 | 0,82 |
| Adenine phosphoribosyltransferase OS=Homo sapiens GN=APRT PE=1 SV=2 - [APT_HUMAN]                                 |      |      |      |      |
|                                                                                                                   | 1,16 | 1,00 | 2,71 | 1,62 |
| Adenosylhomocysteinase OS=Homo sapiens GN=AHCY PE=1 SV=4 - [SAHH_HUMAN]                                           | 1,07 | 0,98 | 1,01 | 1,02 |
| Adenylate kinase 2, mitochondrial OS=Homo sapiens GN=AK2 PE=1 SV=2 - [KAD2_HUMAN]                                 | 0,91 | 1,20 | 1,35 | 1,15 |
| Adenylate kinase isoenzyme 1 OS=Homo sapiens GN=AK1 PE=1 SV=3 - [KAD1_HUMAN]                                      | 1,42 | -    | -    | 1,42 |
| Adenylosuccinate lyase OS=Homo sapiens GN=ADSL PE=1 SV=2 - [PUR8_HUMAN]                                           | 0,91 | 0,91 | 1,05 | 0,95 |
| Adenylosuccinate synthetase isozyme 2 OS=Homo sapiens GN=ADSS PE=1 SV=3 - [PURA2_HUMAN]                           | 0,85 | 1,08 | 0,83 | 0,92 |
| Adenylyl cyclase-associated protein 1 OS=Homo sapiens GN=CAP1 PE=1 SV=5 - [CAP1_HUMAN]                            |      |      |      |      |
|                                                                                                                   | 0,98 | 1,29 | 1,16 | 1,14 |
| Adipocyte plasma membrane-associated protein OS=Homo sapiens GN=APMAP PE=1 SV=2 - [APMAP_HUMAN]                   | 1,49 | -    | 0,99 | 1,24 |
| ADP/ATP translocase 2 OS=Homo sapiens GN=SLC25A5 PE=1 SV=7 - [ADT2_HUMAN]                                         | -    | 0,81 | 0,79 | 0,80 |
| ADP/ATP translocase 3 OS=Homo sapiens GN=SLC25A6 PE=1 SV=4 - [ADT3_HUMAN]                                         | 1,11 | 0,90 | 0,78 | 0,93 |
| ADP-ribosylation factor 3 OS=Homo sapiens GN=ARF3 PE=1 SV=2 - [ARF3_HUMAN]                                        | 1,15 | 2,02 | 1,14 | 1,44 |
| ADP-ribosylation factor-like protein 6-interacting protein 1 OS=Homo sapiens GN=ARL6IP1 PE=1 SV=2 - [AR6P1_HUMAN] | 0,78 | -    | -    | 0,78 |
| Adseverin OS=Homo sapiens GN=SCIN PE=1 SV=4 - [ADSV_HUMAN]                                                        | 1,21 | 1,17 | 1,17 | 1,18 |
| Alanine--tRNA ligase, cytoplasmic OS=Homo sapiens GN=AARS PE=1 SV=2 - [SYAC_HUMAN]                                |      |      |      |      |
|                                                                                                                   | 1,04 | 1,00 | 1,00 | 1,01 |
| Alanine--tRNA ligase, mitochondrial OS=Homo sapiens GN=AARS2 PE=1 SV=1 - [SYAM_HUMAN]                             |      |      |      |      |
|                                                                                                                   | 1,67 | 0,56 | 0,64 | 0,96 |
| Alcohol dehydrogenase [NADP(+)] OS=Homo sapiens GN=AKR1A1 PE=1 SV=3 - [AK1A1_HUMAN]                               | 1,68 | 2,28 | -    | 1,98 |
| Alcohol dehydrogenase class-3 OS=Homo sapiens GN=ADH5 PE=1 SV=4 - [ADHX_HUMAN]                                    | 3,73 | 1,03 | 1,21 | 1,99 |
| Aldehyde dehydrogenase, mitochondrial OS=Homo sapiens GN=ALDH2 PE=1 SV=2 - [ALDH2_HUMAN]                          |      |      |      |      |
|                                                                                                                   | 0,92 | 0,69 | 0,76 | 0,79 |

|                                                                                                                          |      |      |      |      |
|--------------------------------------------------------------------------------------------------------------------------|------|------|------|------|
| Aldo-keto reductase family 1 member C1 OS=Homo sapiens GN=AKR1C1 PE=1 SV=1 - [AK1C1_HUMAN]                               | 0,86 | 0,78 | 0,84 | 0,83 |
| Aldose reductase OS=Homo sapiens GN=AKR1B1 PE=1 SV=3 - [ALDR_HUMAN]                                                      | 1,13 | 1,10 | 1,05 | 1,09 |
| Alpha-actinin-1 OS=Homo sapiens GN=ACTN1 PE=1 SV=2 - [ACTN1_HUMAN]                                                       | 0,87 | 0,92 | 0,90 | 0,90 |
| Alpha-actinin-4 OS=Homo sapiens GN=ACTN4 PE=1 SV=2 - [ACTN4_HUMAN]                                                       | 1,02 | 0,98 | 1,00 | 1,00 |
| Alpha-aminoacidic semialdehyde dehydrogenase OS=Homo sapiens GN=ALDH7A1 PE=1 SV=5 - [AL7A1_HUMAN]                        | 0,99 | 1,45 | 1,28 | 1,24 |
| Alpha-enolase OS=Homo sapiens GN=ENO1 PE=1 SV=2 - [ENOA_HUMAN]                                                           | 1,12 | 1,11 | 1,10 | 1,11 |
| Alpha-soluble NSF attachment protein OS=Homo sapiens GN=NAPA PE=1 SV=3 - [SNAA_HUMAN]                                    | 0,84 | -    | -    | 0,84 |
| Aminoacyl tRNA synthase complex-interacting multifunctional protein 1 OS=Homo sapiens GN=AIMP1 PE=1 SV=2 - [AIMP1_HUMAN] | 1,29 | -    | 1,51 | 1,40 |
| Aminoacyl tRNA synthase complex-interacting multifunctional protein 2 OS=Homo sapiens GN=AIMP2 PE=1 SV=2 - [AIMP2_HUMAN] | 1,11 | 0,92 | 1,68 | 1,24 |
| Aminopeptidase B OS=Homo sapiens GN=RNPEP PE=1 SV=2 - [AMPB_HUMAN]                                                       | 1,58 | 0,86 | 1,31 | 1,25 |
| AMP deaminase 2 OS=Homo sapiens GN=AMPD2 PE=1 SV=2 - [AMPD2_HUMAN]                                                       | 0,87 | 1,15 | 1,07 | 1,03 |
| Amyloid beta A4 protein OS=Homo sapiens GN=APP PE=1 SV=3 - [A4_HUMAN]                                                    | 0,60 | 0,91 | 0,96 | 0,82 |
| Amyloid-like protein 2 OS=Homo sapiens GN=APLP2 PE=1 SV=2 - [APLP2_HUMAN]                                                | 2,95 | 2,51 | -    | 2,73 |
| Anion exchange protein 2 OS=Homo sapiens GN=SLC4A2 PE=1 SV=4 - [B3A2_HUMAN]                                              | 1,93 | 2,05 | 1,77 | 1,92 |
| Ankyrin repeat and FYVE domain-containing protein 1 OS=Homo sapiens GN=ANKFY1 PE=1 SV=2 - [ANFY1_HUMAN]                  | -    | -    | 4,99 | 4,99 |
| Annexin A1 OS=Homo sapiens GN=ANXA1 PE=1 SV=2 - [ANXA1_HUMAN]                                                            | 1,07 | 1,07 | 1,04 | 1,06 |
| Annexin A11 OS=Homo sapiens GN=ANXA11 PE=1 SV=1 - [ANX11_HUMAN]                                                          | 0,99 | -    | -    | 0,99 |
| Annexin A2 OS=Homo sapiens GN=ANXA2 PE=1 SV=2 - [ANXA2_HUMAN]                                                            | 0,98 | 0,99 | 1,02 | 1,00 |
| Annexin A3 OS=Homo sapiens GN=ANXA3 PE=1 SV=3 - [ANXA3_HUMAN]                                                            | 1,02 | 1,20 | 1,77 | 1,33 |
| Annexin A4 OS=Homo sapiens GN=ANXA4 PE=1 SV=4 - [ANXA4_HUMAN]                                                            | 0,99 | 0,98 | 0,98 | 0,98 |
| Annexin A5 OS=Homo sapiens GN=ANXA5 PE=1 SV=2 - [ANXA5_HUMAN]                                                            | 1,01 | 1,04 | 1,04 | 1,03 |
| Annexin A6 OS=Homo sapiens GN=ANXA6 PE=1 SV=3 - [ANXA6_HUMAN]                                                            | 1,05 | 1,08 | 1,01 | 1,05 |
| Annexin A7 OS=Homo sapiens GN=ANXA7 PE=1 SV=3 - [ANXA7_HUMAN]                                                            | 0,76 | 0,58 | 0,72 | 0,69 |
| AP-1 complex subunit beta-1 OS=Homo sapiens GN=AP1B1 PE=1 SV=2 - [AP1B1_HUMAN]                                           | 1,35 | 0,95 | 1,13 | 1,14 |
| AP-1 complex subunit gamma-1 OS=Homo sapiens GN=AP1G1 PE=1 SV=5 - [AP1G1_HUMAN]                                          | 1,28 | 1,49 | 1,56 | 1,44 |
| AP-2 complex subunit alpha-1 OS=Homo sapiens GN=AP2A1 PE=1 SV=3 - [AP2A1_HUMAN]                                          | 1,27 | -    | 1,11 | 1,19 |
| AP-2 complex subunit alpha-2 OS=Homo sapiens GN=AP2A2 PE=1 SV=2 - [AP2A2_HUMAN]                                          | 1,04 | 0,97 | 0,89 | 0,97 |
| AP-2 complex subunit beta OS=Homo sapiens GN=AP2B1 PE=1 SV=1 - [AP2B1_HUMAN]                                             | 1,02 | 1,13 | 1,03 | 1,06 |
| AP-2 complex subunit mu OS=Homo sapiens GN=AP2M1 PE=1 SV=2 - [AP2M1_HUMAN]                                               | 1,09 | -    | -    | 1,09 |
| AP-3 complex subunit beta-1 OS=Homo sapiens GN=AP3B1 PE=1 SV=3 - [AP3B1_HUMAN]                                           | 1,08 | 0,76 | 0,95 | 0,93 |
| AP-3 complex subunit delta-1 OS=Homo sapiens GN=AP3D1 PE=1 SV=1 - [AP3D1_HUMAN]                                          | 0,63 | -    | 1,16 | 0,89 |
| Apoptosis inhibitor 5 OS=Homo sapiens GN=API5 PE=1 SV=3 - [API5_HUMAN]                                                   | 0,35 | 0,41 | 0,30 | 0,35 |
| Apoptosis-inducing factor 1, mitochondrial OS=Homo sapiens GN=AIFM1 PE=1 SV=1 - [AIFM1_HUMAN]                            | 1,30 | -    | 1,74 | 1,52 |
| Apoptotic chromatin condensation inducer in the nucleus OS=Homo sapiens GN=ACIN1 PE=1 SV=2 - [ACINU_HUMAN]               | 0,94 | 1,36 | 0,84 | 1,05 |
| Arginine--tRNA ligase, cytoplasmic OS=Homo sapiens GN=RARS PE=1 SV=2 - [SYRC_HUMAN]                                      | 0,88 | 1,00 | 1,00 | 0,96 |
| Asparagine synthetase [glutamine-hydrolyzing] OS=Homo sapiens GN=ASNS PE=1 SV=4 - [ASNS_HUMAN]                           | 0,81 | 0,89 | 0,81 | 0,83 |
| Asparagine--tRNA ligase, cytoplasmic OS=Homo sapiens GN=NARS PE=1 SV=1 - [SYNC_HUMAN]                                    | 0,94 | 0,95 | 1,05 | 0,98 |
| Aspartate aminotransferase, cytoplasmic OS=Homo sapiens GN=GOT1 PE=1 SV=3 - [AATC_HUMAN]                                 | 1,08 | 0,39 | 1,08 | 0,85 |
| Aspartate aminotransferase, mitochondrial OS=Homo sapiens GN=GOT2 PE=1 SV=3 - [AATM_HUMAN]                               | 1,30 | 1,26 | 1,24 | 1,27 |
| Aspartate--tRNA ligase, cytoplasmic OS=Homo sapiens GN=DARS PE=1 SV=2 - [SYDC_HUMAN]                                     | 1,06 | 1,20 | 1,03 | 1,10 |
| Aspartyl/asparaginyl beta-hydroxylase OS=Homo sapiens GN=ASPH PE=1 SV=3 - [ASPH_HUMAN]                                   | 1,19 | 1,13 | 0,90 | 1,07 |
| Ataxin-2 OS=Homo sapiens GN=ATXN2 PE=1 SV=2 - [ATX2_HUMAN]                                                               | 0,82 | -    | -    | 0,82 |
| Ataxin-2-like protein OS=Homo sapiens GN=ATXN2L PE=1 SV=2 - [ATX2L_HUMAN]                                                | 1,09 | 2,91 | 2,86 | 2,29 |
| Atlastin-3 OS=Homo sapiens GN=ATL3 PE=1 SV=1 - [ATLA3_HUMAN]                                                             | 2,63 | -    | -    | 2,63 |
| ATP synthase F(0) complex subunit B1, mitochondrial OS=Homo sapiens GN=ATP5F1 PE=1 SV=2 - [AT5F1_HUMAN]                  | 1,11 | 0,89 | 1,11 | 1,04 |
| ATP synthase subunit a OS=Homo sapiens GN=MT-ATP6 PE=1 SV=1 - [ATP6_HUMAN]                                               | 0,89 | 1,08 | -    | 0,99 |
| ATP synthase subunit alpha, mitochondrial OS=Homo sapiens GN=ATP5A1 PE=1 SV=1 - [ATPA_HUMAN]                             | 1,08 | 0,98 | 1,13 | 1,06 |
| ATP synthase subunit beta, mitochondrial OS=Homo sapiens GN=ATP5B PE=1 SV=3 - [ATPB_HUMAN]                               | 1,29 | 1,25 | 1,20 | 1,25 |
| ATP synthase subunit f, mitochondrial OS=Homo sapiens GN=ATP5J2 PE=1 SV=3 - [ATPK_HUMAN]                                 | 0,97 | 1,65 | 1,10 | 1,24 |

|                                                                                                                                       |      |      |      |      |
|---------------------------------------------------------------------------------------------------------------------------------------|------|------|------|------|
| ATP synthase subunit g, mitochondrial OS=Homo sapiens GN=ATP5L PE=1 SV=3 - [ATP5L_HUMAN]                                              | 1,16 | 0,81 | 0,85 | 0,94 |
| ATP synthase subunit gamma, mitochondrial OS=Homo sapiens GN=ATP5C1 PE=1 SV=1 - [ATPG_HUMAN]                                          | 0,86 | 0,87 | 0,93 | 0,89 |
| ATP synthase subunit O, mitochondrial OS=Homo sapiens GN=ATP5O PE=1 SV=1 - [ATPO_HUMAN]                                               | -    | 0,63 | -    | 0,63 |
| ATPase ASNA1 OS=Homo sapiens GN=ASNA1 PE=1 SV=2 - [ASNA_HUMAN]                                                                        | 0,92 | -    | -    | 0,92 |
| ATPase family AAA domain-containing protein 3A OS=Homo sapiens GN=ATAD3A PE=1 SV=2 - [ATD3A_HUMAN]                                    | 1,06 | -    | 0,87 | 0,97 |
| ATP-binding cassette sub-family D member 3 OS=Homo sapiens GN=ABCD3 PE=1 SV=1 - [ABCD3_HUMAN]                                         | 3,30 | -    | -    | 3,30 |
| ATP-binding cassette sub-family E member 1 OS=Homo sapiens GN=ABCE1 PE=1 SV=1 - [ABCE1_HUMAN]                                         | 1,51 | 1,43 | 1,47 | 1,47 |
| ATP-binding cassette sub-family F member 1 OS=Homo sapiens GN=ABCF1 PE=1 SV=2 - [ABCF1_HUMAN]                                         | -    | 0,97 | -    | 0,97 |
| ATP-binding cassette sub-family F member 2 OS=Homo sapiens GN=ABCF2 PE=1 SV=2 - [ABCF2_HUMAN]                                         | 1,00 | -    | 2,23 | 1,62 |
| ATP-citrate synthase OS=Homo sapiens GN=ACLY PE=1 SV=3 - [ACLY_HUMAN]                                                                 | 0,98 | 0,99 | 1,00 | 0,99 |
| ATP-dependent DNA helicase Q1 OS=Homo sapiens GN=RECQL PE=1 SV=3 - [RECQ1_HUMAN]                                                      | 0,56 | 0,60 | 0,66 | 0,61 |
| ATP-dependent RNA helicase A OS=Homo sapiens GN=DHX9 PE=1 SV=4 - [DHX9_HUMAN]                                                         | 0,88 | 0,93 | 0,95 | 0,92 |
| ATP-dependent RNA helicase DDX1 OS=Homo sapiens GN=DDX1 PE=1 SV=2 - [DDX1_HUMAN]                                                      | 1,06 | 1,01 | 0,80 | 0,96 |
| ATP-dependent RNA helicase DDX18 OS=Homo sapiens GN=DDX18 PE=1 SV=2 - [DDX18_HUMAN]                                                   | 0,78 | 0,64 | 0,96 | 0,79 |
| ATP-dependent RNA helicase DDX19A OS=Homo sapiens GN=DDX19A PE=1 SV=1 - [DD19A_HUMAN]                                                 | -    | -    | 0,71 | 0,71 |
| ATP-dependent RNA helicase DDX39A OS=Homo sapiens GN=DDX39A PE=1 SV=2 - [DX39A_HUMAN]                                                 | 2,49 | -    | 2,80 | 2,64 |
| ATP-dependent RNA helicase DDX3X OS=Homo sapiens GN=DDX3X PE=1 SV=3 - [DDX3X_HUMAN]                                                   | 0,76 | 0,75 | 0,73 | 0,74 |
| ATP-dependent RNA helicase DDX42 OS=Homo sapiens GN=DDX42 PE=1 SV=1 - [DDX42_HUMAN]                                                   | 1,01 | 1,13 | 0,50 | 0,88 |
| ATP-dependent RNA helicase DHX29 OS=Homo sapiens GN=DHX29 PE=1 SV=2 - [DHX29_HUMAN]                                                   | 0,87 | 0,61 | 1,23 | 0,91 |
| Baculoviral IAP repeat-containing protein 6 OS=Homo sapiens GN=BIRC6 PE=1 SV=2 - [BIRC6_HUMAN]                                        | -    | 0,40 | -    | 0,40 |
| Band 4.1-like protein 1 OS=Homo sapiens GN=EPB41L1 PE=1 SV=2 - [E41L1_HUMAN]                                                          | 1,60 | 1,26 | 1,23 | 1,37 |
| Band 4.1-like protein 2 OS=Homo sapiens GN=EPB41L2 PE=1 SV=1 - [E41L2_HUMAN]                                                          | 0,97 | 0,51 | 0,73 | 0,74 |
| Basal cell adhesion molecule OS=Homo sapiens GN=BCAM PE=1 SV=2 - [BCAM_HUMAN]                                                         | 1,35 | 1,11 | 1,73 | 1,40 |
| Basigin OS=Homo sapiens GN=BSG PE=1 SV=2 - [BASL_HUMAN]                                                                               | 0,98 | 1,03 | 1,12 | 1,04 |
| Bcl-2-associated transcription factor 1 OS=Homo sapiens GN=BCLAF1 PE=1 SV=2 - [BCLF1_HUMAN]                                           | 1,01 | 1,22 | 1,12 | 1,12 |
| Beta-actin-like protein 2 OS=Homo sapiens GN=ACTBL2 PE=1 SV=2 - [ACTBL_HUMAN]                                                         | 0,83 | 0,53 | 0,87 | 0,74 |
| Beta-centractin OS=Homo sapiens GN=ACTR1B PE=1 SV=1 - [ACTY_HUMAN]                                                                    | -    | 1,63 | -    | 1,63 |
| Beta-galactosidase OS=Homo sapiens GN=GLB1 PE=1 SV=2 - [BGAL_HUMAN]                                                                   | 1,28 | -    | -    | 1,28 |
| Beta-hexosaminidase subunit beta OS=Homo sapiens GN=HEXB PE=1 SV=3 - [HEXB_HUMAN]                                                     | 0,63 | 1,02 | 0,95 | 0,87 |
| Bifunctional arginine demethylase and lysyl-hydroxylase JMJD6 OS=Homo sapiens GN=JMJD6 PE=1 SV=1 - [JMJD6_HUMAN]                      | 0,62 | -    | -    | 0,62 |
| Bifunctional coenzyme A synthase OS=Homo sapiens GN=COASY PE=1 SV=4 - [COASY_HUMAN]                                                   | 0,86 | 0,82 | 0,80 | 0,82 |
| Bifunctional glutamate/proline-tRNA ligase OS=Homo sapiens GN=EPRS PE=1 SV=5 - [SYEP_HUMAN]                                           | 0,90 | 1,02 | 0,95 | 0,96 |
| Bifunctional methylenetetrahydrofolate dehydrogenase/cyclohydrolase, mitochondrial OS=Homo sapiens GN=MTHFD2 PE=1 SV=2 - [MTDC_HUMAN] | -    | 0,29 | 0,80 | 0,55 |
| Bifunctional protein NCOAT OS=Homo sapiens GN=MGEA5 PE=1 SV=2 - [NCOAT_HUMAN]                                                         | -    | 0,80 | 1,22 | 1,01 |
| Bifunctional purine biosynthesis protein PURH OS=Homo sapiens GN=ATIC PE=1 SV=3 - [PUR9_HUMAN]                                        | 1,08 | 0,78 | 0,96 | 0,94 |
| BoIA-like protein 2 OS=Homo sapiens GN=BOLA2 PE=1 SV=1 - [BOLA2_HUMAN]                                                                | 1,44 | -    | -    | 1,44 |
| Brain-specific angiogenesis inhibitor 1-associated protein 2-like protein 1 OS=Homo sapiens GN=BAIAP2L1 PE=1 SV=2 - [BI2L1_HUMAN]     | -    | 0,92 | -    | 0,92 |
| BRCA2 and CDKN1A-interacting protein OS=Homo sapiens GN=BCCIP PE=1 SV=1 - [BCCIP_HUMAN]                                               | 1,00 | -    | -    | 1,00 |
| Brefeldin A-inhibited guanine nucleotide-exchange protein 1 OS=Homo sapiens GN=ARFGEF1 PE=1 SV=2 - [BIG1_HUMAN]                       | -    | 0,19 | -    | 0,19 |
| C-1-tetrahydrofolate synthase, cytoplasmic OS=Homo sapiens GN=MTHFD1 PE=1 SV=3 - [C1TC_HUMAN]                                         | 1,04 | 1,14 | 1,12 | 1,10 |
| CAD protein OS=Homo sapiens GN=CAD PE=1 SV=3 - [PYR1_HUMAN]                                                                           | 1,13 | 1,15 | 1,05 | 1,11 |
| Calcium homeostasis endoplasmic reticulum protein OS=Homo sapiens GN=CHERP PE=1 SV=3 - [CHERP_HUMAN]                                  | 1,27 | 1,06 | 2,62 | 1,65 |
| Calcium/calmodulin-dependent protein kinase type II subunit delta OS=Homo sapiens GN=CAMK2D PE=1 SV=3 - [KCC2D_HUMAN]                 | -    | -    | 0,36 | 0,36 |
| Calcium-binding mitochondrial carrier protein SCaMC-1 OS=Homo sapiens GN=SLC25A24 PE=1 SV=2 - [SCMC1_HUMAN]                           | 1,14 | 1,01 | 0,97 | 1,04 |
| Calcyclin-binding protein OS=Homo sapiens GN=CACYBP PE=1 SV=2 - [CYBP_HUMAN]                                                          | 0,67 | 0,82 | 0,79 | 0,76 |

|                                                                                                               |      |      |      |      |
|---------------------------------------------------------------------------------------------------------------|------|------|------|------|
| Caldesmon OS=Homo sapiens GN=CALD1 PE=1 SV=3 - [CALD1_HUMAN]                                                  | 1,30 | -    | 1,06 | 1,18 |
| Calnexin OS=Homo sapiens GN=CANX PE=1 SV=2 - [CALX_HUMAN]                                                     | 1,37 | 1,29 | 1,23 | 1,30 |
| Calpain small subunit 1 OS=Homo sapiens GN=CAPNS1 PE=1 SV=1 - [CPNS1_HUMAN]                                   | 0,88 | 0,85 | 0,85 | 0,86 |
| Calpain-1 catalytic subunit OS=Homo sapiens GN=CAPN1 PE=1 SV=1 - [CAN1_HUMAN]                                 | 1,61 | 1,56 | 1,18 | 1,45 |
| Calpain-2 catalytic subunit OS=Homo sapiens GN=CAPN2 PE=1 SV=6 - [CAN2_HUMAN]                                 | 1,44 | 1,40 | 1,39 | 1,41 |
| Calpastatin OS=Homo sapiens GN=CAST PE=1 SV=4 - [ICAL_HUMAN]                                                  | 1,40 | 1,27 | 1,48 | 1,38 |
| Calponin-2 OS=Homo sapiens GN=CNN2 PE=1 SV=4 - [CNN2_HUMAN]                                                   | 0,89 | 0,99 | 0,83 | 0,90 |
| Calponin-3 OS=Homo sapiens GN=CNN3 PE=1 SV=1 - [CNN3_HUMAN]                                                   | 3,51 | 2,57 | -    | 3,04 |
| Calreticulin OS=Homo sapiens GN=CALR PE=1 SV=1 - [CALR_HUMAN]                                                 | 1,52 | 1,06 | 1,40 | 1,33 |
| Calumenin OS=Homo sapiens GN=CALU PE=1 SV=2 - [CALU_HUMAN]                                                    | 1,10 | 1,43 | 1,15 | 1,23 |
| Caprin-1 OS=Homo sapiens GN=CAPRIN1 PE=1 SV=2 - [CAPR1_HUMAN]                                                 | 0,67 | 0,65 | 0,87 | 0,73 |
| Carbonic anhydrase 2 OS=Homo sapiens GN=CA2 PE=1 SV=2 - [CAH2_HUMAN]                                          | 1,16 | 1,49 | 1,32 | 1,32 |
| Carbonyl reductase [NADPH] 1 OS=Homo sapiens GN=CBR1 PE=1 SV=3 - [CBR1_HUMAN]                                 | 1,14 | 1,16 | 1,15 | 1,15 |
| Carnitine O-palmitoyltransferase 1, liver isoform OS=Homo sapiens GN=CPT1A PE=1 SV=2 - [CPT1A_HUMAN]          | 1,46 | 1,14 | 1,42 | 1,34 |
| Casein kinase II subunit alpha OS=Homo sapiens GN=CSNK2A1 PE=1 SV=1 - [CSK21_HUMAN]                           | 2,50 | 2,54 | 1,96 | 2,33 |
| Catalase OS=Homo sapiens GN=CAT PE=1 SV=3 - [CATA_HUMAN]                                                      | 3,02 | 2,06 | 1,86 | 2,31 |
| Catenin alpha-1 OS=Homo sapiens GN=CTNNA1 PE=1 SV=1 - [CTNA1_HUMAN]                                           | 0,15 | 0,55 | -    | 0,35 |
| Catenin delta-1 OS=Homo sapiens GN=CTNND1 PE=1 SV=1 - [CTND1_HUMAN]                                           | 1,00 | 1,25 | 1,10 | 1,11 |
| Cathepsin D OS=Homo sapiens GN=CTSD PE=1 SV=1 - [CATD_HUMAN]                                                  | 0,88 | 0,96 | 0,88 | 0,91 |
| Cathepsin Z OS=Homo sapiens GN=CTSZ PE=1 SV=1 - [CATZ_HUMAN]                                                  | -    | 0,94 | 0,66 | 0,80 |
| CCAAT/enhancer-binding protein zeta OS=Homo sapiens GN=CEBPZ PE=1 SV=3 - [CEBPZ_HUMAN]                        | 1,09 | -    | -    | 1,09 |
| CCR4-NOT transcription complex subunit 1 OS=Homo sapiens GN=CNOT1 PE=1 SV=2 - [CNOT1_HUMAN]                   | 0,79 | 1,50 | -    | 1,15 |
| CD2-associated protein OS=Homo sapiens GN=CD2AP PE=1 SV=1 - [CD2AP_HUMAN]                                     | 0,71 | -    | -    | 0,71 |
| Cell cycle and apoptosis regulator protein 2 OS=Homo sapiens GN=CCAR2 PE=1 SV=2 - [CCAR2_HUMAN]               | 1,22 | 1,03 | 1,13 | 1,13 |
| Cell division control protein 42 homolog OS=Homo sapiens GN=CDC42 PE=1 SV=2 - [CDC42_HUMAN]                   | -    | -    | 1,16 | 1,16 |
| Cell division cycle 5-like protein OS=Homo sapiens GN=CDC5L PE=1 SV=2 - [CDC5L_HUMAN]                         | 3,38 | -    | 0,85 | 2,11 |
| Cell division cycle and apoptosis regulator protein 1 OS=Homo sapiens GN=CCAR1 PE=1 SV=2 - [CCAR1_HUMAN]      | 0,74 | 1,28 | 0,90 | 0,97 |
| Centrosomal protein of 170 kDa OS=Homo sapiens GN=CEP170 PE=1 SV=1 - [CE170_HUMAN]                            | 0,75 | 0,67 | 0,64 | 0,69 |
| Chloride intracellular channel protein 1 OS=Homo sapiens GN=CLIC1 PE=1 SV=4 - [CLIC1_HUMAN]                   | 0,98 | 0,91 | 1,08 | 0,99 |
| Chloride intracellular channel protein 4 OS=Homo sapiens GN=CLIC4 PE=1 SV=4 - [CLIC4_HUMAN]                   | 0,94 | 1,27 | -    | 1,11 |
| Chromobox protein homolog 3 OS=Homo sapiens GN=CBX3 PE=1 SV=4 - [CBX3_HUMAN]                                  | 1,26 | 0,68 | 0,79 | 0,91 |
| Chromodomain-helicase-DNA-binding protein 4 OS=Homo sapiens GN=CHD4 PE=1 SV=2 - [CHD4_HUMAN]                  | 1,37 | -    | -    | 1,37 |
| Chromosome-associated kinesin KIF4A OS=Homo sapiens GN=KIF4A PE=1 SV=3 - [KIF4A_HUMAN]                        | -    | -    | 0,42 | 0,42 |
| Citrate synthase, mitochondrial OS=Homo sapiens GN=CS PE=1 SV=2 - [CISY_HUMAN]                                | 1,07 | 0,98 | 1,01 | 1,02 |
| C-Jun-amino-terminal kinase-interacting protein 4 OS=Homo sapiens GN=SPAG9 PE=1 SV=4 - [JIP4_HUMAN]           | 1,55 | 1,24 | 1,29 | 1,36 |
| Clathrin heavy chain 1 OS=Homo sapiens GN=CLTC PE=1 SV=5 - [CLH1_HUMAN]                                       | 1,00 | 1,02 | 0,99 | 1,00 |
| Clathrin interactor 1 OS=Homo sapiens GN=CLINT1 PE=1 SV=1 - [EPN4_HUMAN]                                      | -    | 0,64 | -    | 0,64 |
| Cleavage and polyadenylation specificity factor subunit 1 OS=Homo sapiens GN=CPSF1 PE=1 SV=2 - [CPSF1_HUMAN]  | 0,73 | 0,96 | 0,89 | 0,86 |
| Cleavage and polyadenylation specificity factor subunit 2 OS=Homo sapiens GN=CPSF2 PE=1 SV=2 - [CPSF2_HUMAN]  | 0,80 | -    | 1,07 | 0,94 |
| Cleavage and polyadenylation specificity factor subunit 5 OS=Homo sapiens GN=NUDT21 PE=1 SV=1 - [CPSF5_HUMAN] | -    | -    | 1,03 | 1,03 |
| Cleavage and polyadenylation specificity factor subunit 6 OS=Homo sapiens GN=CPSF6 PE=1 SV=2 - [CPSF6_HUMAN]  | -    | 1,28 | 0,88 | 1,08 |
| Cleavage stimulation factor subunit 3 OS=Homo sapiens GN=CSTF3 PE=1 SV=1 - [CSTF3_HUMAN]                      | 0,27 | -    | -    | 0,27 |
| Cleft lip and palate transmembrane protein 1 OS=Homo sapiens GN=CLPTM1 PE=1 SV=1 - [CLPT1_HUMAN]              | 1,06 | -    | 0,69 | 0,87 |
| CLIP-associating protein 1 OS=Homo sapiens GN=CLASP1 PE=1 SV=1 - [CLAP1_HUMAN]                                | 0,82 | -    | -    | 0,82 |
| CLIP-associating protein 2 OS=Homo sapiens GN=CLASP2 PE=1 SV=2 - [CLAP2_HUMAN]                                | 0,92 | 1,82 | 0,78 | 1,17 |
| Coactosin-like protein OS=Homo sapiens GN=COTL1 PE=1 SV=3 - [COTL1_HUMAN]                                     | 1,02 | 0,56 | 0,80 | 0,79 |
| Coatomer subunit alpha OS=Homo sapiens GN=COPA PE=1 SV=2 - [COPA_HUMAN]                                       | 0,88 | 0,95 | 0,90 | 0,91 |
| Coatomer subunit beta OS=Homo sapiens GN=COPB1 PE=1 SV=3 - [COPB_HUMAN]                                       | 0,88 | 0,81 | 1,14 | 0,94 |
| Coatomer subunit beta' OS=Homo sapiens GN=COPB2 PE=1 SV=2 - [COPB2_HUMAN]                                     | 0,98 | 1,01 | 1,02 | 1,00 |

|                                                                                                                         |      |      |      |      |
|-------------------------------------------------------------------------------------------------------------------------|------|------|------|------|
| Coatomer subunit delta OS=Homo sapiens GN=ARCN1 PE=1 SV=1 - [COPD_HUMAN]                                                | -    | -    | 0,61 | 0,61 |
| Coatomer subunit gamma-1 OS=Homo sapiens GN=COPG1 PE=1 SV=1 - [COPG1_HUMAN]                                             | 1,10 | 0,99 | 0,98 | 1,02 |
| Coatomer subunit gamma-2 OS=Homo sapiens GN=COPG2 PE=1 SV=1 - [COPG2_HUMAN]                                             | 2,41 | -    | -    | 2,41 |
| Cofilin-1 OS=Homo sapiens GN=CFL1 PE=1 SV=3 - [COF1_HUMAN]                                                              | 0,96 | 0,95 | 1,03 | 0,98 |
| Cold shock domain-containing protein E1 OS=Homo sapiens GN=CSDE1 PE=1 SV=2 - [CSDE1_HUMAN]                              | -    | 0,94 | 0,96 | 0,95 |
| Collagen alpha-1(IV) chain OS=Homo sapiens GN=COL4A1 PE=1 SV=3 - [CO4A1_HUMAN]                                          | -    | 0,34 | 0,57 | 0,46 |
| Complement component 1 Q subcomponent-binding protein, mitochondrial OS=Homo sapiens GN=C1QBP PE=1 SV=1 - [C1QBP_HUMAN] | 2,19 | 1,25 | 0,77 | 1,41 |
| Condensin complex subunit 1 OS=Homo sapiens GN=NCAPD2 PE=1 SV=3 - [CND1_HUMAN]                                          | 0,49 | 0,58 | 0,43 | 0,50 |
| Condensin complex subunit 3 OS=Homo sapiens GN=NCAPG PE=1 SV=1 - [CND3_HUMAN]                                           | 0,77 | 0,83 | -    | 0,80 |
| Constitutive coactivator of PPAR-gamma-like protein 1 OS=Homo sapiens GN=FAM120A PE=1 SV=2 - [F120A_HUMAN]              | 0,78 | 0,48 | 1,00 | 0,75 |
| COP9 signalosome complex subunit 1 OS=Homo sapiens GN=GPS1 PE=1 SV=4 - [CSN1_HUMAN]                                     | 1,10 | -    | -    | 1,10 |
| COP9 signalosome complex subunit 3 OS=Homo sapiens GN=COPS3 PE=1 SV=3 - [CSN3_HUMAN]                                    | 0,89 | -    | -    | 0,89 |
| COP9 signalosome complex subunit 4 OS=Homo sapiens GN=COPS4 PE=1 SV=1 - [CSN4_HUMAN]                                    | -    | 1,14 | -    | 1,14 |
| Copine-3 OS=Homo sapiens GN=CPNE3 PE=1 SV=1 - [CPNE3_HUMAN]                                                             | 0,88 | -    | -    | 0,88 |
| Core histone macro-H2A.1 OS=Homo sapiens GN=H2AFY PE=1 SV=4 - [H2AY_HUMAN]                                              | 0,61 | 0,89 | 0,92 | 0,81 |
| Coronin-1B OS=Homo sapiens GN=CORO1B PE=1 SV=1 - [COR1B_HUMAN]                                                          | 1,03 | 0,94 | 0,93 | 0,97 |
| Coronin-7 OS=Homo sapiens GN=CORO7 PE=1 SV=2 - [CORO7_HUMAN]                                                            | 2,74 | -    | -    | 2,74 |
| CTP synthase 1 OS=Homo sapiens GN=CTPS1 PE=1 SV=2 - [PYRG1_HUMAN]                                                       | 1,31 | 2,86 | 0,96 | 1,71 |
| Cullin-1 OS=Homo sapiens GN=CUL1 PE=1 SV=2 - [CUL1_HUMAN]                                                               | 0,67 | 1,21 | -    | 0,94 |
| Cullin-2 OS=Homo sapiens GN=CUL2 PE=1 SV=2 - [CUL2_HUMAN]                                                               | 0,92 | 1,07 | 1,17 | 1,05 |
| Cullin-associated NEDD8-dissociated protein 1 OS=Homo sapiens GN=CAND1 PE=1 SV=2 - [CAND1_HUMAN]                        | 1,01 | 1,36 | 1,01 | 1,13 |
| Cutaneous T-cell lymphoma-associated antigen 5 OS=Homo sapiens GN=CTAGE5 PE=1 SV=4 - [CTGE5_HUMAN]                      | 1,05 | -    | -    | 1,05 |
| Cyclic AMP-responsive element-binding protein 1 OS=Homo sapiens GN=CREB1 PE=1 SV=2 - [CREB1_HUMAN]                      | 0,77 | -    | -    | 0,77 |
| Cyclin-dependent kinase 11B OS=Homo sapiens GN=CDK11B PE=1 SV=3 - [CD11B_HUMAN]                                         | 0,99 | 0,39 | 0,57 | 0,65 |
| Cyclin-G-associated kinase OS=Homo sapiens GN=GAK PE=1 SV=2 - [GAK_HUMAN]                                               | 7,14 | -    | -    | 7,14 |
| Cystathionine beta-synthase OS=Homo sapiens GN=CBS PE=1 SV=2 - [CBS_HUMAN]                                              | 1,09 | 1,14 | 1,23 | 1,15 |
| Cystatin-B OS=Homo sapiens GN=CSTB PE=1 SV=2 - [CYTB_HUMAN]                                                             | 1,12 | 1,12 | 1,12 | 1,12 |
| Cysteine and glycine-rich protein 1 OS=Homo sapiens GN=CSRP1 PE=1 SV=3 - [CSRP1_HUMAN]                                  | 0,98 | 1,20 | -    | 1,09 |
| Cysteine-rich protein 2 OS=Homo sapiens GN=CRIP2 PE=1 SV=1 - [CRIP2_HUMAN]                                              | -    | 2,36 | -    | 2,36 |
| Cysteine--tRNA ligase, cytoplasmic OS=Homo sapiens GN=CARS PE=1 SV=3 - [SYCC_HUMAN]                                     | 1,09 | 1,06 | 0,97 | 1,04 |
| Cytochrome b-c1 complex subunit 1, mitochondrial OS=Homo sapiens GN=UQCRC1 PE=1 SV=3 - [QCR1_HUMAN]                     | 1,26 | 0,91 | 0,88 | 1,01 |
| Cytochrome b-c1 complex subunit 2, mitochondrial OS=Homo sapiens GN=UQCRC2 PE=1 SV=3 - [QCR2_HUMAN]                     | 1,30 | 0,91 | 1,34 | 1,18 |
| Cytochrome c OS=Homo sapiens GN=CYCS PE=1 SV=2 - [CYC_HUMAN]                                                            | 1,19 | 1,19 | 1,26 | 1,21 |
| Cytochrome c oxidase subunit 2 OS=Homo sapiens GN=MT-CO2 PE=1 SV=1 - [COX2_HUMAN]                                       | 0,76 | -    | -    | 0,76 |
| Cytochrome c1, heme protein, mitochondrial OS=Homo sapiens GN=CYC1 PE=1 SV=3 - [CY1_HUMAN]                              | 0,81 | -    | -    | 0,81 |
| Cytoplasmic dynein 1 heavy chain 1 OS=Homo sapiens GN=DYNC1H1 PE=1 SV=5 - [DYHC1_HUMAN]                                 | 0,94 | 0,93 | 0,87 | 0,91 |
| Cytoplasmic dynein 1 intermediate chain 2 OS=Homo sapiens GN=DYNC1I2 PE=1 SV=3 - [DC1I2_HUMAN]                          | 1,66 | 1,50 | 1,40 | 1,52 |
| Cytoplasmic FMR1-interacting protein 1 OS=Homo sapiens GN=CYFIP1 PE=1 SV=1 - [CYFP1_HUMAN]                              | 0,88 | 0,77 | 0,72 | 0,79 |
| Cytoplasmic FMR1-interacting protein 2 OS=Homo sapiens GN=CYFIP2 PE=1 SV=2 - [CYFP2_HUMAN]                              | 3,09 | -    | -    | 3,09 |
| Cytoskeleton-associated protein 4 OS=Homo sapiens GN=CKAP4 PE=1 SV=2 - [CKAP4_HUMAN]                                    | 0,89 | 0,97 | 0,97 | 0,94 |
| Cytoskeleton-associated protein 5 OS=Homo sapiens GN=CKAP5 PE=1 SV=3 - [CKAP5_HUMAN]                                    | 1,33 | 1,16 | 1,18 | 1,22 |
| Cytosol aminopeptidase OS=Homo sapiens GN=LAP3 PE=1 SV=3 - [AMPL_HUMAN]                                                 | 0,76 | 1,00 | 1,08 | 0,94 |
| Cytosolic acyl coenzyme A thioester hydrolase OS=Homo sapiens GN=ACOT7 PE=1 SV=3 - [BACH_HUMAN]                         | 0,92 | 0,94 | 1,18 | 1,01 |
| D-3-phosphoglycerate dehydrogenase OS=Homo sapiens GN=PHGDH PE=1 SV=4 - [SERA_HUMAN]                                    | 1,17 | 1,14 | 0,95 | 1,09 |
| DAZ-associated protein 1 OS=Homo sapiens GN=DAZAP1 PE=1 SV=1 - [DAZP1_HUMAN]                                            | 2,21 | -    | 1,18 | 1,70 |
| DBIRD complex subunit ZNF326 OS=Homo sapiens GN=ZNF326 PE=1 SV=2 - [ZN326_HUMAN]                                        | 0,55 | 0,65 | 0,58 | 0,59 |
| D-dopachrome decarboxylase OS=Homo sapiens GN=DDT PE=1 SV=3 - [DOPD_HUMAN]                                              | 1,63 | 2,12 | 1,13 | 1,63 |

|                                                                                                                                                                   |      |      |      |      |
|-------------------------------------------------------------------------------------------------------------------------------------------------------------------|------|------|------|------|
| Delta(3,5)-Delta(2,4)-dienoyl-CoA isomerase, mitochondrial OS=Homo sapiens GN=ECH1 PE=1 SV=2 - [ECH1_HUMAN]                                                       | 1,15 | 0,95 | 1,13 | 1,08 |
| Delta-1-pyrroline-5-carboxylate synthase OS=Homo sapiens GN=ALDH18A1 PE=1 SV=2 - [P5CS_HUMAN]                                                                     | 1,30 | 1,42 | 1,11 | 1,28 |
| Desmoplakin OS=Homo sapiens GN=DSP PE=1 SV=3 - [DESP_HUMAN]                                                                                                       | 0,74 | 0,77 | 0,59 | 0,70 |
| Destrin OS=Homo sapiens GN=DSTN PE=1 SV=3 - [DEST_HUMAN]                                                                                                          | 0,87 | 0,84 | 0,84 | 0,85 |
| Dihydrolipoyl dehydrogenase, mitochondrial OS=Homo sapiens GN=DLD PE=1 SV=2 - [DLDH_HUMAN]                                                                        | 1,08 | 0,84 | 2,58 | 1,50 |
| Dihydrolipoyllysine-residue acetyltransferase component of pyruvate dehydrogenase complex, mitochondrial OS=Homo sapiens GN=DLAT PE=1 SV=3 - [ODP2_HUMAN]         | 1,06 | 1,24 | 1,83 | 1,38 |
| Dihydrolipoyllysine-residue succinyltransferase component of 2-oxoglutarate dehydrogenase complex, mitochondrial OS=Homo sapiens GN=DLST PE=1 SV=4 - [ODO2_HUMAN] | 0,43 | 0,52 | 1,06 | 0,67 |
| Dihydropyrimidinase-related protein 2 OS=Homo sapiens GN=DPYSL2 PE=1 SV=1 - [DPYL2_HUMAN]                                                                         | 0,63 | 0,73 | 1,31 | 0,89 |
| Dipeptidyl peptidase 3 OS=Homo sapiens GN=DPP3 PE=1 SV=2 - [DPP3_HUMAN]                                                                                           | -    | -    | 1,23 | 1,23 |
| Dipeptidyl peptidase 4 OS=Homo sapiens GN=DPP4 PE=1 SV=2 - [DPP4_HUMAN]                                                                                           | 0,82 | 0,89 | 0,93 | 0,88 |
| Dipeptidyl peptidase 9 OS=Homo sapiens GN=DPP9 PE=1 SV=3 - [DPP9_HUMAN]                                                                                           | -    | 1,04 | -    | 1,04 |
| DNA (cytosine-5)-methyltransferase 1 OS=Homo sapiens GN=DNMT1 PE=1 SV=2 - [DNMT1_HUMAN]                                                                           | 0,70 | 1,18 | 0,17 | 0,69 |
| DNA damage-binding protein 1 OS=Homo sapiens GN=DDB1 PE=1 SV=1 - [DDB1_HUMAN]                                                                                     | 0,86 | 0,79 | 0,86 | 0,84 |
| DNA fragmentation factor subunit alpha OS=Homo sapiens GN=DFFA PE=1 SV=1 - [DFFA_HUMAN]                                                                           | -    | -    | 1,24 | 1,24 |
| DNA ligase 1 OS=Homo sapiens GN=LIG1 PE=1 SV=1 - [DNLI1_HUMAN]                                                                                                    | 1,82 | -    | -    | 1,82 |
| DNA replication licensing factor MCM2 OS=Homo sapiens GN=MCM2 PE=1 SV=4 - [MCM2_HUMAN]                                                                            | 0,81 | 0,82 | 0,87 | 0,83 |
| DNA replication licensing factor MCM3 OS=Homo sapiens GN=MCM3 PE=1 SV=3 - [MCM3_HUMAN]                                                                            | 0,78 | 0,88 | 0,85 | 0,84 |
| DNA replication licensing factor MCM4 OS=Homo sapiens GN=MCM4 PE=1 SV=5 - [MCM4_HUMAN]                                                                            | 0,83 | 0,78 | 0,81 | 0,81 |
| DNA replication licensing factor MCM5 OS=Homo sapiens GN=MCM5 PE=1 SV=5 - [MCM5_HUMAN]                                                                            | 1,05 | 0,86 | 0,90 | 0,94 |
| DNA replication licensing factor MCM6 OS=Homo sapiens GN=MCM6 PE=1 SV=1 - [MCM6_HUMAN]                                                                            | 0,83 | 0,88 | 0,83 | 0,84 |
| DNA replication licensing factor MCM7 OS=Homo sapiens GN=MCM7 PE=1 SV=4 - [MCM7_HUMAN]                                                                            | 1,15 | 1,02 | 0,96 | 1,04 |
| DNA topoisomerase 1 OS=Homo sapiens GN=TOP1 PE=1 SV=2 - [TOP1_HUMAN]                                                                                              | 1,04 | 1,12 | 1,34 | 1,16 |
| DNA topoisomerase 2-beta OS=Homo sapiens GN=TOP2B PE=1 SV=3 - [TOP2B_HUMAN]                                                                                       | 0,68 | 1,03 | 0,69 | 0,80 |
| DNA-(apurinic or apyrimidinic site) lyase OS=Homo sapiens GN=APEX1 PE=1 SV=2 - [APEX1_HUMAN]                                                                      | 1,17 | 1,46 | 0,99 | 1,21 |
| DNA-dependent protein kinase catalytic subunit OS=Homo sapiens GN=PRKDC PE=1 SV=3 - [PRKDC_HUMAN]                                                                 | 0,88 | 0,89 | 0,89 | 0,89 |
| DNA-directed RNA polymerase II subunit RPB1 OS=Homo sapiens GN=POLR2A PE=1 SV=2 - [RPB1_HUMAN]                                                                    | 1,76 | 1,74 | 1,41 | 1,63 |
| DNA-directed RNA polymerase II subunit RPB2 OS=Homo sapiens GN=POLR2B PE=1 SV=1 - [RPB2_HUMAN]                                                                    | 1,11 | 1,04 | 1,39 | 1,18 |
| DNA-directed RNA polymerase, mitochondrial OS=Homo sapiens GN=POLRMT PE=1 SV=2 - [RPOM_HUMAN]                                                                     | 0,67 | 1,33 | 2,20 | 1,40 |
| DnaJ homolog subfamily A member 1 OS=Homo sapiens GN=DNAJA1 PE=1 SV=2 - [DNJA1_HUMAN]                                                                             | 0,91 | -    | 1,05 | 0,98 |
| DnaJ homolog subfamily A member 2 OS=Homo sapiens GN=DNAJA2 PE=1 SV=1 - [DNJA2_HUMAN]                                                                             | 0,77 | 0,88 | 0,93 | 0,86 |
| DnaJ homolog subfamily C member 10 OS=Homo sapiens GN=DNAJC10 PE=1 SV=2 - [DJC10_HUMAN]                                                                           | 0,70 | 0,51 | -    | 0,61 |
| Dolichyl-diphosphooligosaccharide--protein glycosyltransferase 48 kDa subunit OS=Homo sapiens GN=DDOST PE=1 SV=4 - [OST48_HUMAN]                                  | 0,96 | 0,68 | 0,91 | 0,85 |
| Dolichyl-diphosphooligosaccharide--protein glycosyltransferase subunit 1 OS=Homo sapiens GN=RPN1 PE=1 SV=1 - [RPN1_HUMAN]                                         | 1,14 | 0,91 | 1,04 | 1,03 |
| Dolichyl-diphosphooligosaccharide--protein glycosyltransferase subunit 2 OS=Homo sapiens GN=RPN2 PE=1 SV=3 - [RPN2_HUMAN]                                         | 1,15 | 0,91 | 1,03 | 1,03 |
| Dolichyl-diphosphooligosaccharide--protein glycosyltransferase subunit STT3A OS=Homo sapiens GN=STT3A PE=1 SV=2 - [STT3A_HUMAN]                                   | 0,57 | 0,51 | -    | 0,54 |
| Dolichyl-diphosphooligosaccharide--protein glycosyltransferase subunit STT3B OS=Homo sapiens GN=STT3B PE=1 SV=1 - [STT3B_HUMAN]                                   | 1,47 | -    | 1,77 | 1,62 |
| Double-stranded RNA-specific adenosine deaminase OS=Homo sapiens GN=ADAR PE=1 SV=4 - [DSRAD_HUMAN]                                                                | 1,15 | 1,12 | 1,07 | 1,11 |
| Drebrin OS=Homo sapiens GN=DBN1 PE=1 SV=4 - [DREB_HUMAN]                                                                                                          | 0,88 | 0,93 | 0,90 | 0,90 |
| Drebrin-like protein OS=Homo sapiens GN=DBNL PE=1 SV=1 - [DBNL_HUMAN]                                                                                             | 1,15 | 1,08 | 1,18 | 1,13 |
| Dual specificity mitogen-activated protein kinase kinase 1 OS=Homo sapiens GN=MAP2K1 PE=1 SV=2 - [MP2K1_HUMAN]                                                    | -    | 1,01 | -    | 1,01 |
| Dynactin subunit 1 OS=Homo sapiens GN=DCTN1 PE=1 SV=3 - [DCTN1_HUMAN]                                                                                             | 1,01 | 0,96 | 1,22 | 1,06 |
| Dynamamin-1-like protein OS=Homo sapiens GN=DNM1L PE=1 SV=2 - [DNM1L_HUMAN]                                                                                       | 0,99 | 1,16 | 0,92 | 1,02 |
| Dynamamin-2 OS=Homo sapiens GN=DNM2 PE=1 SV=2 - [DYN2_HUMAN]                                                                                                      | 1,26 | 1,12 | 1,13 | 1,17 |
| Dynamamin-like 120 kDa protein, mitochondrial OS=Homo sapiens GN=OPA1 PE=1 SV=3 - [OPA1_HUMAN]                                                                    | -    | 0,76 | -    | 0,76 |
| Dynein light chain 1, cytoplasmic OS=Homo sapiens GN=DYNLL1 PE=1 SV=1 - [DYL1_HUMAN]                                                                              | 1,12 | 0,90 | 1,08 | 1,03 |

|                                                                                                                        |      |      |      |      |
|------------------------------------------------------------------------------------------------------------------------|------|------|------|------|
| E3 SUMO-protein ligase RanBP2 OS=Homo sapiens GN=RANBP2 PE=1 SV=2 - [RBP2_HUMAN]                                       | 0,79 | 1,12 | 1,21 | 1,04 |
| E3 ubiquitin/ISG15 ligase TRIM25 OS=Homo sapiens GN=TRIM25 PE=1 SV=2 - [TRIM25_HUMAN]                                  | 0,58 | 0,56 | 0,32 | 0,49 |
| E3 ubiquitin-protein ligase BRE1A OS=Homo sapiens GN=RNF20 PE=1 SV=2 - [BRE1A_HUMAN]                                   | -    | 1,20 | 2,72 | 1,96 |
| E3 ubiquitin-protein ligase HUWE1 OS=Homo sapiens GN=HUWE1 PE=1 SV=3 - [HUWE1_HUMAN]                                   | -    | 1,11 | -    | 1,11 |
| E3 ubiquitin-protein ligase UBR4 OS=Homo sapiens GN=UBR4 PE=1 SV=1 - [UBR4_HUMAN]                                      | 1,28 | 0,85 | 0,68 | 0,94 |
| Echinoderm microtubule-associated protein-like 4 OS=Homo sapiens GN=EML4 PE=1 SV=3 - [EML4_HUMAN]                      | -    | 1,14 | -    | 1,14 |
| EH domain-containing protein 1 OS=Homo sapiens GN=EHD1 PE=1 SV=2 - [EHD1_HUMAN]                                        | 2,88 | 3,28 | 1,60 | 2,58 |
| ELAV-like protein 1 OS=Homo sapiens GN=ELAVL1 PE=1 SV=2 - [ELAV1_HUMAN]                                                | 0,84 | 0,73 | 0,84 | 0,80 |
| Electron transfer flavoprotein subunit alpha, mitochondrial OS=Homo sapiens GN=ETFA PE=1 SV=1 - [ETFA_HUMAN]           | 1,02 | 1,53 | 1,32 | 1,29 |
| Electron transfer flavoprotein subunit beta OS=Homo sapiens GN=ETFB PE=1 SV=3 - [ETFB_HUMAN]                           | 1,32 | 1,11 | 1,24 | 1,22 |
| ELKS/Rab6-interacting/CAST family member 1 OS=Homo sapiens GN=ERC1 PE=1 SV=1 - [RB6I2_HUMAN]                           | 1,63 | -    | -    | 1,63 |
| Elongation factor 1-alpha 1 OS=Homo sapiens GN=EEF1A1 PE=1 SV=1 - [EF1A1_HUMAN]                                        | 1,32 | 1,12 | 1,21 | 1,22 |
| Elongation factor 1-alpha 2 OS=Homo sapiens GN=EEF1A2 PE=1 SV=1 - [EF1A2_HUMAN]                                        | -    | -    | 1,66 | 1,66 |
| Elongation factor 1-beta OS=Homo sapiens GN=EEF1B2 PE=1 SV=3 - [EF1B_HUMAN]                                            | 0,95 | 1,17 | 1,05 | 1,06 |
| Elongation factor 1-delta OS=Homo sapiens GN=EEF1D PE=1 SV=5 - [EF1D_HUMAN]                                            | 1,29 | 1,08 | 1,18 | 1,18 |
| Elongation factor 1-gamma OS=Homo sapiens GN=EEF1G PE=1 SV=3 - [EF1G_HUMAN]                                            | 0,88 | 0,94 | 1,01 | 0,94 |
| Elongation factor 2 OS=Homo sapiens GN=EEF2 PE=1 SV=4 - [EF2_HUMAN]                                                    | 0,96 | 0,98 | 0,97 | 0,97 |
| Elongation factor Tu, mitochondrial OS=Homo sapiens GN=TUFM PE=1 SV=2 - [EFTU_HUMAN]                                   | 1,09 | 0,95 | 1,01 | 1,02 |
| Endophilin-A1 OS=Homo sapiens GN=SH3GL2 PE=1 SV=1 - [SH3G2_HUMAN]                                                      | -    | -    | 1,29 | 1,29 |
| Endoplasmic reticulum resident protein 29 OS=Homo sapiens GN=ERP29 PE=1 SV=4 - [ERP29_HUMAN]                           | 0,83 | 1,19 | 0,97 | 0,99 |
| Endoplasmic reticulum resident protein 44 OS=Homo sapiens GN=ERP44 PE=1 SV=1 - [ERP44_HUMAN]                           | -    | 3,61 | 1,36 | 2,49 |
| Endoplasmin OS=Homo sapiens GN=HSP90B1 PE=1 SV=1 - [ENPL_HUMAN]                                                        | 0,90 | 0,90 | 0,93 | 0,91 |
| Endothelial differentiation-related factor 1 OS=Homo sapiens GN=EDF1 PE=1 SV=1 - [EDF1_HUMAN]                          | 0,60 | -    | -    | 0,60 |
| Enhancer of mRNA-decapping protein 4 OS=Homo sapiens GN=EDC4 PE=1 SV=1 - [EDC4_HUMAN]                                  | 1,23 | 1,40 | 0,91 | 1,18 |
| Enhancer of rudimentary homolog OS=Homo sapiens GN=ERH PE=1 SV=1 - [ERH_HUMAN]                                         | 1,56 | -    | -    | 1,56 |
| Enoyl-CoA delta isomerase 1, mitochondrial OS=Homo sapiens GN=ECI1 PE=1 SV=1 - [ECI1_HUMAN]                            | 0,91 | 1,09 | 1,14 | 1,05 |
| Enoyl-CoA hydratase, mitochondrial OS=Homo sapiens GN=ECHS1 PE=1 SV=4 - [ECHM_HUMAN]                                   | 1,43 | 3,08 | 1,69 | 2,07 |
| Ephrin type-A receptor 3 OS=Homo sapiens GN=EPHA3 PE=1 SV=2 - [EPHA3_HUMAN]                                            | -    | 1,12 | 1,59 | 1,36 |
| Epidermal growth factor receptor kinase substrate 8-like protein 2 OS=Homo sapiens GN=EPS8L2 PE=1 SV=2 - [ES8L2_HUMAN] | 1,64 | 0,56 | -    | 1,10 |
| Epidermal growth factor receptor OS=Homo sapiens GN=EGFR PE=1 SV=2 - [EGFR_HUMAN]                                      | 1,18 | 0,83 | 1,37 | 1,13 |
| Epidermal growth factor receptor substrate 15-like 1 OS=Homo sapiens GN=EPS15L1 PE=1 SV=1 - [EP15R_HUMAN]              | -    | 1,14 | 0,36 | 0,75 |
| Epididymal secretory protein E1 OS=Homo sapiens GN=NPC2 PE=1 SV=1 - [NPC2_HUMAN]                                       | 1,70 | -    | -    | 1,70 |
| Epiplakin OS=Homo sapiens GN=EPPK1 PE=1 SV=2 - [EPIPL_HUMAN]                                                           | -    | -    | 0,97 | 0,97 |
| Erlin-2 OS=Homo sapiens GN=ERLIN2 PE=1 SV=1 - [ERLIN2_HUMAN]                                                           | 1,08 | 1,28 | 0,92 | 1,09 |
| ERO1-like protein alpha OS=Homo sapiens GN=ERO1L PE=1 SV=2 - [ERO1A_HUMAN]                                             | 0,73 | 1,45 | -    | 1,09 |
| Eukaryotic initiation factor 4A-I OS=Homo sapiens GN=EIF4A1 PE=1 SV=1 - [IF4A1_HUMAN]                                  | 0,77 | 0,78 | 0,71 | 0,75 |
| Eukaryotic initiation factor 4A-III OS=Homo sapiens GN=EIF4A3 PE=1 SV=4 - [IF4A3_HUMAN]                                | 1,10 | 1,14 | 0,84 | 1,03 |
| Eukaryotic peptide chain release factor GTP-binding subunit ERF3A OS=Homo sapiens GN=GSPT1 PE=1 SV=1 - [ERF3A_HUMAN]   | 1,22 | 1,05 | 0,89 | 1,05 |
| Eukaryotic translation elongation factor 1 epsilon-1 OS=Homo sapiens GN=EEF1E1 PE=1 SV=1 - [MCA3_HUMAN]                | -    | -    | 1,35 | 1,35 |
| Eukaryotic translation initiation factor 2 subunit 1 OS=Homo sapiens GN=EIF2S1 PE=1 SV=3 - [IF2A_HUMAN]                | 0,78 | 1,17 | 0,75 | 0,90 |
| Eukaryotic translation initiation factor 2 subunit 3 OS=Homo sapiens GN=EIF2S3 PE=1 SV=3 - [IF2G_HUMAN]                | -    | 0,98 | 1,19 | 1,09 |
| Eukaryotic translation initiation factor 3 subunit A OS=Homo sapiens GN=EIF3A PE=1 SV=1 - [EIF3A_HUMAN]                | 0,85 | 0,85 | 0,79 | 0,83 |
| Eukaryotic translation initiation factor 3 subunit B OS=Homo sapiens GN=EIF3B PE=1 SV=3 - [EIF3B_HUMAN]                | 0,70 | 0,93 | 0,86 | 0,83 |
| Eukaryotic translation initiation factor 3 subunit C OS=Homo sapiens GN=EIF3C PE=1 SV=1 - [EIF3C_HUMAN]                | 0,92 | 0,94 | 0,93 | 0,93 |
| Eukaryotic translation initiation factor 3 subunit D OS=Homo sapiens GN=EIF3D PE=1 SV=1 - [EIF3D_HUMAN]                | 0,33 | 0,76 | 0,68 | 0,59 |
| Eukaryotic translation initiation factor 3 subunit E OS=Homo sapiens GN=EIF3E PE=1 SV=1 - [EIF3E_HUMAN]                | 0,77 | 0,95 | 0,99 | 0,90 |

|                                                                                                          |      |      |      |      |
|----------------------------------------------------------------------------------------------------------|------|------|------|------|
| Eukaryotic translation initiation factor 3 subunit F OS=Homo sapiens GN=EIF3F PE=1 SV=1 - [EIF3F_HUMAN]  | 0,95 | 0,66 | 0,86 | 0,82 |
| Eukaryotic translation initiation factor 3 subunit G OS=Homo sapiens GN=EIF3G PE=1 SV=2 - [EIF3G_HUMAN]  | -    | 0,61 | 0,68 | 0,64 |
| Eukaryotic translation initiation factor 3 subunit I OS=Homo sapiens GN=EIF3I PE=1 SV=1 - [EIF3I_HUMAN]  | 1,04 | 1,08 | 0,88 | 1,00 |
| Eukaryotic translation initiation factor 3 subunit L OS=Homo sapiens GN=EIF3L PE=1 SV=1 - [EIF3L_HUMAN]  | 0,54 | 0,70 | 0,88 | 0,71 |
| Eukaryotic translation initiation factor 4 gamma 1 OS=Homo sapiens GN=EIF4G1 PE=1 SV=4 - [IF4G1_HUMAN]   | 0,87 | 0,93 | 0,92 | 0,90 |
| Eukaryotic translation initiation factor 4 gamma 2 OS=Homo sapiens GN=EIF4G2 PE=1 SV=1 - [IF4G2_HUMAN]   | 0,41 | 0,38 | 0,53 | 0,44 |
| Eukaryotic translation initiation factor 4B OS=Homo sapiens GN=EIF4B PE=1 SV=2 - [IF4B_HUMAN]            | 1,03 | 1,21 | 0,72 | 0,99 |
| Eukaryotic translation initiation factor 5 OS=Homo sapiens GN=EIF5 PE=1 SV=2 - [IF5_HUMAN]               | -    | 0,50 | -    | 0,50 |
| Eukaryotic translation initiation factor 5A-1 OS=Homo sapiens GN=EIF5A PE=1 SV=2 - [IF5A1_HUMAN]         | 0,82 | 0,96 | 0,89 | 0,89 |
| Eukaryotic translation initiation factor 5B OS=Homo sapiens GN=EIF5B PE=1 SV=4 - [IF2P_HUMAN]            | 1,19 | 1,02 | 1,21 | 1,14 |
| Eukaryotic translation initiation factor 6 OS=Homo sapiens GN=EIF6 PE=1 SV=1 - [IF6_HUMAN]               | 1,27 | 1,32 | 0,93 | 1,17 |
| Exosome complex exonuclease RRP44 OS=Homo sapiens GN=DIS3 PE=1 SV=2 - [RRP44_HUMAN]                      | 1,76 | 1,43 | 1,02 | 1,40 |
| Exportin-1 OS=Homo sapiens GN=XPO1 PE=1 SV=1 - [XPO1_HUMAN]                                              | 0,85 | 0,89 | 0,86 | 0,87 |
| Exportin-2 OS=Homo sapiens GN=CSE1L PE=1 SV=3 - [XPO2_HUMAN]                                             | 0,98 | 0,99 | 1,05 | 1,01 |
| Exportin-5 OS=Homo sapiens GN=XPO5 PE=1 SV=1 - [XPO5_HUMAN]                                              | 1,12 | 0,85 | 0,79 | 0,92 |
| Exportin-7 OS=Homo sapiens GN=XPO7 PE=1 SV=3 - [XPO7_HUMAN]                                              | 1,10 | 1,23 | 0,91 | 1,08 |
| Exportin-T OS=Homo sapiens GN=XPOT PE=1 SV=2 - [XPOT_HUMAN]                                              | 1,19 | 1,12 | 1,44 | 1,25 |
| Extended synaptotagmin-1 OS=Homo sapiens GN=ESYT1 PE=1 SV=1 - [ESYT1_HUMAN]                              | 0,96 | 1,06 | 1,00 | 1,01 |
| Ezrin OS=Homo sapiens GN=EZR PE=1 SV=4 - [EZRI_HUMAN]                                                    | 0,99 | 1,02 | 0,92 | 0,98 |
| FACT complex subunit SPT16 OS=Homo sapiens GN=SUPT16H PE=1 SV=1 - [SP16H_HUMAN]                          | 0,99 | 1,06 | 0,96 | 1,00 |
| FACT complex subunit SSRP1 OS=Homo sapiens GN=SSRP1 PE=1 SV=1 - [SSRP1_HUMAN]                            | 0,94 | 0,89 | 0,90 | 0,91 |
| F-actin-capping protein subunit alpha-1 OS=Homo sapiens GN=CAPZA1 PE=1 SV=3 - [CAZA1_HUMAN]              | 1,21 | 0,82 | 0,95 | 0,99 |
| F-actin-capping protein subunit alpha-2 OS=Homo sapiens GN=CAPZA2 PE=1 SV=3 - [CAZA2_HUMAN]              | 0,81 | 0,89 | 1,12 | 0,94 |
| F-actin-capping protein subunit beta OS=Homo sapiens GN=CAPZB PE=1 SV=4 - [CAPZB_HUMAN]                  | 1,83 | 1,12 | 1,14 | 1,36 |
| Far upstream element-binding protein 1 OS=Homo sapiens GN=FUBP1 PE=1 SV=3 - [FUBP1_HUMAN]                | 1,05 | 1,01 | 0,95 | 1,01 |
| Far upstream element-binding protein 2 OS=Homo sapiens GN=KHSRP PE=1 SV=4 - [FUBP2_HUMAN]                | 1,34 | 1,14 | 1,21 | 1,23 |
| Far upstream element-binding protein 3 OS=Homo sapiens GN=FUBP3 PE=1 SV=2 - [FUBP3_HUMAN]                | 0,74 | -    | -    | 0,74 |
| FAS-associated factor 1 OS=Homo sapiens GN=FAF1 PE=1 SV=2 - [FAF1_HUMAN]                                 | 1,24 | -    | -    | 1,24 |
| Fascin OS=Homo sapiens GN=FSCN1 PE=1 SV=3 - [FSCN1_HUMAN]                                                | -    | -    | 0,43 | 0,43 |
| Fatty acid-binding protein, epidermal OS=Homo sapiens GN=FABP5 PE=1 SV=3 - [FABP5_HUMAN]                 | 0,94 | 0,85 | 0,89 | 0,89 |
| Filamin-A OS=Homo sapiens GN=FLNA PE=1 SV=4 - [FLNA_HUMAN]                                               | 0,93 | 0,96 | 0,98 | 0,96 |
| Filamin-B OS=Homo sapiens GN=FLNB PE=1 SV=2 - [FLNB_HUMAN]                                               | 1,04 | 1,11 | 1,19 | 1,11 |
| Filamin-C OS=Homo sapiens GN=FLNC PE=1 SV=3 - [FLNC_HUMAN]                                               | 1,01 | 0,97 | 0,95 | 0,98 |
| FK506-binding protein 15 OS=Homo sapiens GN=FKBP15 PE=1 SV=2 - [FKB15_HUMAN]                             | 1,44 | 1,16 | 0,85 | 1,15 |
| Flap endonuclease 1 OS=Homo sapiens GN=FEN1 PE=1 SV=1 - [FEN1_HUMAN]                                     | 1,20 | 1,50 | -    | 1,35 |
| Flavin reductase (NADPH) OS=Homo sapiens GN=BLVRB PE=1 SV=3 - [BLVRB_HUMAN]                              | 0,46 | 0,93 | -    | 0,70 |
| Fragile X mental retardation syndrome-related protein 2 OS=Homo sapiens GN=FXR2 PE=1 SV=2 - [FXR2_HUMAN] | 0,74 | 1,02 | 0,86 | 0,87 |
| Fructose-bisphosphate aldolase A OS=Homo sapiens GN=ALDOA PE=1 SV=2 - [ALDOA_HUMAN]                      | 1,17 | 1,12 | 1,13 | 1,14 |
| Fructose-bisphosphate aldolase C OS=Homo sapiens GN=ALDOC PE=1 SV=2 - [ALDOC_HUMAN]                      | 1,53 | 1,36 | 1,34 | 1,41 |
| Fumarate hydratase, mitochondrial OS=Homo sapiens GN=FB PE=1 SV=3 - [FUMH_HUMAN]                         | 2,00 | 1,30 | 1,18 | 1,49 |
| FYVE, RhoGEF and PH domain-containing protein 4 OS=Homo sapiens GN=FGD4 PE=1 SV=2 - [FGD4_HUMAN]         | 4,33 | 2,79 | 2,79 | 3,30 |
| Galectin-1 OS=Homo sapiens GN=LGALS1 PE=1 SV=2 - [LEG1_HUMAN]                                            | 0,89 | 0,89 | 0,93 | 0,90 |
| Galectin-3-binding protein OS=Homo sapiens GN=LGALS3BP PE=1 SV=1 - [LG3BP_HUMAN]                         | 0,98 | 0,90 | 0,90 | 0,93 |
| Gamma-enolase OS=Homo sapiens GN=ENO2 PE=1 SV=3 - [ENOG_HUMAN]                                           | 0,63 | 1,02 | -    | 0,83 |
| Gelsolin OS=Homo sapiens GN=GSN PE=1 SV=1 - [GELS_HUMAN]                                                 | 1,72 | 1,66 | 1,49 | 1,62 |
| Gem-associated protein 5 OS=Homo sapiens GN=GEMIN5 PE=1 SV=3 - [GEMI5_HUMAN]                             | 0,99 | 1,09 | -    | 1,04 |
| General transcription factor 3C polypeptide 4 OS=Homo sapiens GN=GTF3C4 PE=1 SV=2 - [TF3C4_HUMAN]        | 0,68 | 0,74 | -    | 0,71 |



|                                                                                                                             |      |      |      |      |
|-----------------------------------------------------------------------------------------------------------------------------|------|------|------|------|
| General transcription factor II-I OS=Homo sapiens GN=GTF2I PE=1 SV=2 - [GTF2I_HUMAN]                                        | 0,93 | 0,85 | 1,00 | 0,92 |
| General vesicular transport factor p115 OS=Homo sapiens GN=USO1 PE=1 SV=2 - [USO1_HUMAN]                                    | 1,04 | 1,12 | 1,20 | 1,12 |
| Glucosamine-6-phosphate isomerase 1 OS=Homo sapiens GN=GNPDA1 PE=1 SV=1 - [GNP1_HUMAN]                                      | 1,14 | -    | -    | 1,14 |
| Glucose-6-phosphate 1-dehydrogenase OS=Homo sapiens GN=G6PD PE=1 SV=4 - [G6PD_HUMAN]                                        | 1,02 | 1,02 | 1,09 | 1,05 |
| Glucose-6-phosphate isomerase OS=Homo sapiens GN=GPI PE=1 SV=4 - [G6PI_HUMAN]                                               | 1,16 | 1,21 | 1,13 | 1,17 |
| Glucosidase 2 subunit beta OS=Homo sapiens GN=PRKCSH PE=1 SV=2 - [GLU2B_HUMAN]                                              | 1,05 | 1,00 | 1,00 | 1,02 |
| Glutamate dehydrogenase 1, mitochondrial OS=Homo sapiens GN=GLUD1 PE=1 SV=2 - [DHE3_HUMAN]                                  | 1,08 | 1,04 | 1,00 | 1,04 |
| Glutamate--cysteine ligase regulatory subunit OS=Homo sapiens GN=GCLM PE=1 SV=1 - [GSH0_HUMAN]                              | -    | 0,93 | -    | 0,93 |
| Glutaminase kidney isoform, mitochondrial OS=Homo sapiens GN=GLS PE=1 SV=1 - [GLSK_HUMAN]                                   | 1,02 | 0,94 | 1,00 | 0,99 |
| Glutamine--fructose-6-phosphate aminotransferase [isomerizing] 1 OS=Homo sapiens GN=GFPT1 PE=1 SV=3 - [GFPT1_HUMAN]         | 0,79 | 1,08 | 1,05 | 0,97 |
| Glutamine--tRNA ligase OS=Homo sapiens GN=QARS PE=1 SV=1 - [SYQ_HUMAN]                                                      | 1,00 | 1,21 | 1,45 | 1,22 |
| Glutathione reductase, mitochondrial OS=Homo sapiens GN=GSR PE=1 SV=2 - [GSHR_HUMAN]                                        | 0,98 | 1,23 | 1,45 | 1,22 |
| Glutathione S-transferase kappa 1 OS=Homo sapiens GN=GSTK1 PE=1 SV=3 - [GSTK1_HUMAN]                                        | -    | 1,08 | 1,70 | 1,39 |
| Glutathione S-transferase Mu 3 OS=Homo sapiens GN=GSTM3 PE=1 SV=3 - [GSTM3_HUMAN]                                           | 0,94 | 0,99 | 1,01 | 0,98 |
| Glutathione S-transferase omega-1 OS=Homo sapiens GN=GSTO1 PE=1 SV=2 - [GSTO1_HUMAN]                                        | 1,95 | 1,27 | 1,26 | 1,49 |
| Glutathione S-transferase P OS=Homo sapiens GN=GSTP1 PE=1 SV=2 - [GSTP1_HUMAN]                                              | 1,47 | 1,54 | 1,44 | 1,48 |
| Glyceraldehyde-3-phosphate dehydrogenase OS=Homo sapiens GN=GAPDH PE=1 SV=3 - [G3P_HUMAN]                                   | 1,07 | 1,11 | 1,10 | 1,09 |
| Glycine dehydrogenase (decarboxylating), mitochondrial OS=Homo sapiens GN=GLDC PE=1 SV=2 - [GCSP_HUMAN]                     | -    | 1,31 | -    | 1,31 |
| Glycine--tRNA ligase OS=Homo sapiens GN=GARS PE=1 SV=3 - [SYG_HUMAN]                                                        | 1,01 | 0,96 | 1,17 | 1,05 |
| Glycogen phosphorylase, brain form OS=Homo sapiens GN=PYGB PE=1 SV=5 - [PYGB_HUMAN]                                         | 1,28 | 1,07 | 1,15 | 1,17 |
| Glycogen phosphorylase, liver form OS=Homo sapiens GN=PYGL PE=1 SV=4 - [PYGL_HUMAN]                                         | 1,04 | 0,99 | 1,02 | 1,02 |
| Glyoxalase domain-containing protein 4 OS=Homo sapiens GN=GLOD4 PE=1 SV=1 - [GLOD4_HUMAN]                                   | 0,81 | -    | 0,97 | 0,89 |
| Glyoxylate reductase/hydroxypyruvate reductase OS=Homo sapiens GN=GRHPR PE=1 SV=1 - [GRHPR_HUMAN]                           | -    | 3,94 | -    | 3,94 |
| Golgi apparatus protein 1 OS=Homo sapiens GN=GLG1 PE=1 SV=2 - [GLG1_HUMAN]                                                  | 0,45 | 0,51 | 0,45 | 0,47 |
| Golgi reassembly-stacking protein 2 OS=Homo sapiens GN=GORASP2 PE=1 SV=3 - [GORS2_HUMAN]                                    | 0,68 | 1,02 | 0,97 | 0,89 |
| Golgi resident protein GCP60 OS=Homo sapiens GN=ACBD3 PE=1 SV=4 - [GCP60_HUMAN]                                             | -    | 1,64 | -    | 1,64 |
| Golgin subfamily A member 2 OS=Homo sapiens GN=GOLGA2 PE=1 SV=3 - [GOGA2_HUMAN]                                             | 0,93 | 0,93 | 1,15 | 1,01 |
| Golgin subfamily B member 1 OS=Homo sapiens GN=GOLGB1 PE=1 SV=2 - [GOGB1_HUMAN]                                             | -    | -    | 0,77 | 0,77 |
| Golgi-specific brefeldin A-resistance guanine nucleotide exchange factor 1 OS=Homo sapiens GN=GBF1 PE=1 SV=2 - [GBF1_HUMAN] | 0,99 | 1,97 | 0,82 | 1,26 |
| GPI transamidase component PIG-S OS=Homo sapiens GN=PIGS PE=1 SV=3 - [PIGS_HUMAN]                                           | 0,60 | 1,70 | 0,62 | 0,98 |
| G-rich sequence factor 1 OS=Homo sapiens GN=GRSF1 PE=1 SV=3 - [GRSF1_HUMAN]                                                 | 1,19 | 1,58 | 1,34 | 1,37 |
| GTPase-activating protein and VPS9 domain-containing protein 1 OS=Homo sapiens GN=GAPVD1 PE=1 SV=2 - [GAPD1_HUMAN]          | 1,23 | -    | 1,31 | 1,27 |
| GTP-binding nuclear protein Ran OS=Homo sapiens GN=RAN PE=1 SV=3 - [RAN_HUMAN]                                              | 0,85 | 0,94 | 0,83 | 0,88 |
| GTP-binding protein SAR1a OS=Homo sapiens GN=SAR1A PE=1 SV=1 - [SAR1A_HUMAN]                                                | -    | -    | 2,32 | 2,32 |
| Guanine deaminase OS=Homo sapiens GN=GDA PE=1 SV=1 - [GUAD_HUMAN]                                                           | 0,89 | 0,79 | 1,04 | 0,91 |
| Guanine nucleotide-binding protein G(i) subunit alpha-1 OS=Homo sapiens GN=GNAI1 PE=1 SV=2 - [GNAI1_HUMAN]                  | 1,23 | 0,81 | 1,05 | 1,03 |
| Guanine nucleotide-binding protein G(l)/G(s)/G(t) subunit beta-1 OS=Homo sapiens GN=GNB1 PE=1 SV=3 - [GBB1_HUMAN]           | 1,35 | 1,11 | 0,99 | 1,15 |
| Guanine nucleotide-binding protein G(l)/G(s)/G(t) subunit beta-2 OS=Homo sapiens GN=GNB2 PE=1 SV=3 - [GBB2_HUMAN]           | 0,85 | 0,78 | 0,93 | 0,86 |
| Guanine nucleotide-binding protein G(s) subunit alpha isoforms short OS=Homo sapiens GN=GNAS PE=1 SV=1 - [GNAS2_HUMAN]      | -    | 0,51 | 1,46 | 0,99 |
| Guanine nucleotide-binding protein subunit beta-2-like 1 OS=Homo sapiens GN=GNB2L1 PE=1 SV=3 - [GBLP_HUMAN]                 | 0,87 | 0,84 | 0,82 | 0,84 |
| HEAT repeat-containing protein 1 OS=Homo sapiens GN=HEATR1 PE=1 SV=3 - [HEAT1_HUMAN]                                        | 1,23 | 1,04 | -    | 1,14 |
| Heat shock 70 kDa protein 1A/1B OS=Homo sapiens GN=HSPA1A PE=1 SV=5 - [HSP71_HUMAN]                                         | 0,99 | 0,95 | 0,97 | 0,97 |
| Heat shock 70 kDa protein 4 OS=Homo sapiens GN=HSPA4 PE=1 SV=4 - [HSP74_HUMAN]                                              | 1,08 | 1,02 | 1,04 | 1,05 |
| Heat shock 70 kDa protein 4L OS=Homo sapiens GN=HSPA4L PE=1 SV=3 - [HS74L_HUMAN]                                            | 0,74 | 0,31 | -    | 0,52 |

|                                                                                                                |      |      |      |      |
|----------------------------------------------------------------------------------------------------------------|------|------|------|------|
| Heat shock cognate 71 kDa protein OS=Homo sapiens GN=HSPA8 PE=1 SV=1 - [HSP7C_HUMAN]                           | 0,76 | 0,74 | 0,75 | 0,75 |
| Heat shock protein 75 kDa, mitochondrial OS=Homo sapiens GN=TRAP1 PE=1 SV=3 - [TRAP1_HUMAN]                    | 1,07 | 1,17 | 0,99 | 1,08 |
| Heat shock protein beta-1 OS=Homo sapiens GN=HSPB1 PE=1 SV=2 - [HSPB1_HUMAN]                                   | 1,07 | 1,07 | 1,11 | 1,09 |
| Heat shock protein HSP 90-alpha OS=Homo sapiens GN=HSP90AA1 PE=1 SV=5 - [HS90A_HUMAN]                          | 0,86 | 0,85 | 0,92 | 0,87 |
| Heat shock protein HSP 90-beta OS=Homo sapiens GN=HSP90AB1 PE=1 SV=4 - [HS90B_HUMAN]                           | 1,04 | 1,03 | 1,05 | 1,04 |
| Hepatocyte growth factor-regulated tyrosine kinase substrate OS=Homo sapiens GN=HGS PE=1 SV=1 - [HGS_HUMAN]    | 1,24 | -    | 1,22 | 1,23 |
| Hepatoma-derived growth factor OS=Homo sapiens GN=HDGF PE=1 SV=1 - [HDGF_HUMAN]                                | 0,58 | -    | 1,03 | 0,81 |
| Hepatoma-derived growth factor-related protein 2 OS=Homo sapiens GN=HDGFRP2 PE=1 SV=1 - [HDGR2_HUMAN]          | 0,97 | 1,24 | 1,19 | 1,13 |
| Heterochromatin protein 1-binding protein 3 OS=Homo sapiens GN=HP1BP3 PE=1 SV=1 - [HP1B3_HUMAN]                | 1,51 | 1,65 | 2,28 | 1,81 |
| Heterogeneous nuclear ribonucleoprotein A/B OS=Homo sapiens GN=HNRNPAB PE=1 SV=2 - [ROAA_HUMAN]                | 0,65 | 0,46 | 0,76 | 0,62 |
| Heterogeneous nuclear ribonucleoprotein A0 OS=Homo sapiens GN=HNRNPA0 PE=1 SV=1 - [ROA0_HUMAN]                 | 0,87 | 0,91 | 0,95 | 0,91 |
| Heterogeneous nuclear ribonucleoprotein A1 OS=Homo sapiens GN=HNRNPA1 PE=1 SV=5 - [ROA1_HUMAN]                 | 0,94 | 0,96 | 0,95 | 0,95 |
| Heterogeneous nuclear ribonucleoprotein A3 OS=Homo sapiens GN=HNRNPA3 PE=1 SV=2 - [ROA3_HUMAN]                 | 0,83 | 1,00 | 0,94 | 0,92 |
| Heterogeneous nuclear ribonucleoprotein D0 OS=Homo sapiens GN=HNRNPD PE=1 SV=1 - [HNRPD_HUMAN]                 | 0,82 | 1,08 | 1,19 | 1,03 |
| Heterogeneous nuclear ribonucleoprotein D-like OS=Homo sapiens GN=HNRNPD_LIKE PE=1 SV=3 - [HNRDL_HUMAN]        | 0,71 | 0,72 | 0,71 | 0,71 |
| Heterogeneous nuclear ribonucleoprotein F OS=Homo sapiens GN=HNRNPF PE=1 SV=3 - [HNRPF_HUMAN]                  | 0,93 | 1,00 | 0,88 | 0,94 |
| Heterogeneous nuclear ribonucleoprotein H OS=Homo sapiens GN=HNRNPH1 PE=1 SV=4 - [HNRH1_HUMAN]                 | 0,69 | 0,75 | 0,85 | 0,76 |
| Heterogeneous nuclear ribonucleoprotein H2 OS=Homo sapiens GN=HNRNPH2 PE=1 SV=1 - [HNRH2_HUMAN]                | -    | 1,30 | 0,74 | 1,02 |
| Heterogeneous nuclear ribonucleoprotein H3 OS=Homo sapiens GN=HNRNPH3 PE=1 SV=2 - [HNRH3_HUMAN]                | 1,01 | 0,92 | 0,83 | 0,92 |
| Heterogeneous nuclear ribonucleoprotein K OS=Homo sapiens GN=HNRNPK PE=1 SV=1 - [HNRPK_HUMAN]                  | 1,00 | 0,95 | 1,09 | 1,02 |
| Heterogeneous nuclear ribonucleoprotein L OS=Homo sapiens GN=HNRNPL PE=1 SV=2 - [HNRPL_HUMAN]                  | 1,22 | 0,99 | 0,90 | 1,04 |
| Heterogeneous nuclear ribonucleoprotein M OS=Homo sapiens GN=HNRNPM PE=1 SV=3 - [HNRPM_HUMAN]                  | 0,84 | 0,81 | 0,80 | 0,82 |
| Heterogeneous nuclear ribonucleoprotein Q OS=Homo sapiens GN=SYNCRIP PE=1 SV=2 - [HNRPQ_HUMAN]                 | 1,21 | 0,96 | 1,56 | 1,24 |
| Heterogeneous nuclear ribonucleoprotein R OS=Homo sapiens GN=HNRNPR PE=1 SV=1 - [HNRPR_HUMAN]                  | 1,04 | 1,37 | 1,10 | 1,17 |
| Heterogeneous nuclear ribonucleoprotein U OS=Homo sapiens GN=HNRNPU PE=1 SV=6 - [HNRPU_HUMAN]                  | 0,93 | 0,92 | 0,94 | 0,93 |
| Heterogeneous nuclear ribonucleoprotein U-like protein 1 OS=Homo sapiens GN=HNRNPUL1 PE=1 SV=2 - [HNRL1_HUMAN] | 1,04 | 0,99 | 1,41 | 1,14 |
| Heterogeneous nuclear ribonucleoprotein U-like protein 2 OS=Homo sapiens GN=HNRNPUL2 PE=1 SV=1 - [HNRL2_HUMAN] | 0,79 | 0,95 | 0,98 | 0,91 |
| Heterogeneous nuclear ribonucleoproteins A2/B1 OS=Homo sapiens GN=HNRNPA2B1 PE=1 SV=2 - [ROA2_HUMAN]           | 1,11 | 1,08 | 1,00 | 1,06 |
| Heterogeneous nuclear ribonucleoproteins C1/C2 OS=Homo sapiens GN=HNRNPC PE=1 SV=4 - [HNRPC_HUMAN]             | 0,97 | 0,96 | 1,00 | 0,98 |
| Hexokinase-1 OS=Homo sapiens GN=HK1 PE=1 SV=3 - [HXK1_HUMAN]                                                   | 0,76 | -    | -    | 0,76 |
| Hexokinase-2 OS=Homo sapiens GN=HK2 PE=1 SV=2 - [HXK2_HUMAN]                                                   | 1,10 | 0,88 | 1,20 | 1,06 |
| High mobility group protein B1 OS=Homo sapiens GN=HMGB1 PE=1 SV=3 - [HMGB1_HUMAN]                              | 1,02 | 0,83 | 0,90 | 0,92 |
| High mobility group protein B2 OS=Homo sapiens GN=HMGB2 PE=1 SV=2 - [HMGB2_HUMAN]                              | 0,93 | -    | 0,93 | 0,93 |
| Histidine triad nucleotide-binding protein 2, mitochondrial OS=Homo sapiens GN=HINT2 PE=1 SV=1 - [HINT2_HUMAN] | 1,41 | 1,40 | -    | 1,41 |
| Histone deacetylase 1 OS=Homo sapiens GN=HDAC1 PE=1 SV=1 - [HDAC1_HUMAN]                                       | 1,25 | 0,93 | 0,59 | 0,92 |
| Histone H1.0 OS=Homo sapiens GN=H1F0 PE=1 SV=3 - [H10_HUMAN]                                                   | 1,12 | 1,37 | -    | 1,24 |
| Histone H1.3 OS=Homo sapiens GN=HIST1H1D PE=1 SV=2 - [H13_HUMAN]                                               | 1,03 | 1,00 | 0,80 | 0,94 |
| Histone H2A type 1-B/E OS=Homo sapiens GN=HIST1H2AB PE=1 SV=2 - [H2A1B_HUMAN]                                  | 1,37 | 1,17 | 1,42 | 1,32 |
| Histone H2A type 2-B OS=Homo sapiens GN=HIST2H2AB PE=1 SV=3 - [H2A2B_HUMAN]                                    | 1,34 | -    | 1,21 | 1,27 |
| Histone H2A type 2-C OS=Homo sapiens GN=HIST2H2AC PE=1 SV=4 - [H2A2C_HUMAN]                                    | 1,32 | 1,47 | 1,46 | 1,42 |
| Histone H2A.Z OS=Homo sapiens GN=H2AFZ PE=1 SV=2 - [H2AZ_HUMAN]                                                | 0,99 | -    | -    | 0,99 |
| Histone H2B type 1-M OS=Homo sapiens GN=HIST1H2BM PE=1 SV=3 - [H2B1M_HUMAN]                                    | 0,89 | 0,86 | 0,85 | 0,87 |
| Histone H2B type 3-B OS=Homo sapiens GN=HIST3H2BB PE=1 SV=3 - [H2B3B_HUMAN]                                    | 1,06 | 1,15 | 1,10 | 1,10 |
| Histone H3.1 OS=Homo sapiens GN=HIST1H3A PE=1 SV=2 - [H31_HUMAN]                                               | 1,01 | 1,03 | 1,02 | 1,02 |
| Histone H3.2 OS=Homo sapiens GN=HIST2H3A PE=1 SV=3 - [H32_HUMAN]                                               | 1,06 | 1,24 | 0,73 | 1,01 |

|                                                                                                                                  |       |       |       |       |
|----------------------------------------------------------------------------------------------------------------------------------|-------|-------|-------|-------|
| Histone H3.3 OS=Homo sapiens GN=H3F3A PE=1 SV=2 - [H33_HUMAN]                                                                    | 1,20  | 0,97  | 1,62  | 1,26  |
| Histone H4 OS=Homo sapiens GN=HIST1H4A PE=1 SV=2 - [H4_HUMAN]                                                                    | 0,89  | 0,89  | 0,93  | 0,90  |
| Histone-binding protein RBBP4 OS=Homo sapiens GN=RBBP4 PE=1 SV=3 - [RBBP4_HUMAN]                                                 | 0,90  | 1,10  | 0,95  | 0,98  |
| Histone-binding protein RBBP7 OS=Homo sapiens GN=RBBP7 PE=1 SV=1 - [RBBP7_HUMAN]                                                 | 3,85  | -     | 2,96  | 3,41  |
| HLA class I histocompatibility antigen, B-8 alpha chain OS=Homo sapiens GN=HLA-B PE=1 SV=1 - [1B08_HUMAN]                        | 1,28  | 0,89  | 0,97  | 1,05  |
| Host cell factor 1 OS=Homo sapiens GN=HCFC1 PE=1 SV=2 - [HCFC1_HUMAN]                                                            | 1,08  | 1,35  | 0,96  | 1,13  |
| Hsc70-interacting protein OS=Homo sapiens GN=ST13 PE=1 SV=2 - [F10A1_HUMAN]                                                      | 1,08  | 1,11  | 1,17  | 1,12  |
| Hsp90 co-chaperone Cdc37 OS=Homo sapiens GN=CDC37 PE=1 SV=1 - [CDC37_HUMAN]                                                      | 2,07  | 1,71  | 0,83  | 1,54  |
| Huntingtin-interacting protein 1 OS=Homo sapiens GN=HIP1 PE=1 SV=5 - [HIP1_HUMAN]                                                | 1,73  | -     | -     | 1,73  |
| Huntingtin-interacting protein 1-related protein OS=Homo sapiens GN=HIP1R PE=1 SV=2 - [HIP1R_HUMAN]                              | 1,26  | 2,01  | -     | 1,64  |
| Hydroxyacyl-coenzyme A dehydrogenase, mitochondrial OS=Homo sapiens GN=HADH PE=1 SV=3 - [HCDH_HUMAN]                             | 1,17  | -     | 0,94  | 1,05  |
| Hypoxia up-regulated protein 1 OS=Homo sapiens GN=HYOU1 PE=1 SV=1 - [HYOU1_HUMAN]                                                | 1,07  | 1,07  | 0,94  | 1,02  |
| Importin subunit alpha-1 OS=Homo sapiens GN=KPNA2 PE=1 SV=1 - [IMA1_HUMAN]                                                       | 1,18  | 3,33  | 1,28  | 1,93  |
| Importin subunit alpha-7 OS=Homo sapiens GN=KPNA6 PE=1 SV=1 - [IMA7_HUMAN]                                                       | 0,33  | -     | -     | 0,33  |
| Importin subunit beta-1 OS=Homo sapiens GN=KPNB1 PE=1 SV=2 - [IMB1_HUMAN]                                                        | 1,10  | 1,04  | 1,16  | 1,10  |
| Importin-4 OS=Homo sapiens GN=IPO4 PE=1 SV=2 - [IPO4_HUMAN]                                                                      | 1,28  | 1,06  | 0,86  | 1,07  |
| Importin-5 OS=Homo sapiens GN=IPO5 PE=1 SV=4 - [IPO5_HUMAN]                                                                      | 0,94  | 1,02  | 1,08  | 1,01  |
| Importin-7 OS=Homo sapiens GN=IPO7 PE=1 SV=1 - [IPO7_HUMAN]                                                                      | 1,01  | 1,01  | 0,95  | 0,99  |
| Importin-9 OS=Homo sapiens GN=IPO9 PE=1 SV=3 - [IPO9_HUMAN]                                                                      | 0,81  | 0,85  | 0,78  | 0,82  |
| Inner nuclear membrane protein Man1 OS=Homo sapiens GN=LEMD3 PE=1 SV=2 - [MAN1_HUMAN]                                            | -     | -     | 0,86  | 0,86  |
| Inorganic pyrophosphatase OS=Homo sapiens GN=PPA1 PE=1 SV=2 - [IPYR_HUMAN]                                                       | 1,22  | 0,76  | 1,01  | 1,00  |
| Inosine-5'-monophosphate dehydrogenase 2 OS=Homo sapiens GN=IMPDH2 PE=1 SV=2 - [IMDH2_HUMAN]                                     | 0,82  | 0,93  | 0,98  | 0,91  |
| Inositol 1,4,5-trisphosphate receptor type 3 OS=Homo sapiens GN=ITPR3 PE=1 SV=2 - [ITPR3_HUMAN]                                  | 0,99  | -     | 1,15  | 1,07  |
| Inositol-3-phosphate synthase 1 OS=Homo sapiens GN=ISYNA1 PE=1 SV=1 - [INO1_HUMAN]                                               | 1,25  | 1,24  | 1,21  | 1,23  |
| Insulin-degrading enzyme OS=Homo sapiens GN=IDE PE=1 SV=4 - [IDE_HUMAN]                                                          | 0,79  | -     | 1,16  | 0,97  |
| Insulin-like growth factor 2 mRNA-binding protein 1 OS=Homo sapiens GN=IGF2BP1 PE=1 SV=2 - [IF2B1_HUMAN]                         | 1,05  | 1,12  | 1,17  | 1,12  |
| Insulin-like growth factor 2 mRNA-binding protein 2 OS=Homo sapiens GN=IGF2BP2 PE=1 SV=2 - [IF2B2_HUMAN]                         | 2,09  | -     | -     | 2,09  |
| Insulin-like growth factor 2 mRNA-binding protein 3 OS=Homo sapiens GN=IGF2BP3 PE=1 SV=2 - [IF2B3_HUMAN]                         | 1,11  | 1,51  | 1,04  | 1,22  |
| Integrator complex subunit 3 OS=Homo sapiens GN=INTS3 PE=1 SV=1 - [INT3_HUMAN]                                                   | -     | 0,95  | 0,81  | 0,88  |
| Integrin beta-1 OS=Homo sapiens GN=ITGB1 PE=1 SV=2 - [ITB1_HUMAN]                                                                | 0,38  | 0,52  | 0,41  | 0,44  |
| Integrin-linked kinase-associated serine/threonine phosphatase 2C OS=Homo sapiens GN=ILKAP PE=1 SV=1 - [ILKAP_HUMAN]             | 0,50  | -     | -     | 0,50  |
| Interferon-induced transmembrane protein 1 OS=Homo sapiens GN=IFITM1 PE=1 SV=3 - [IFM1_HUMAN]                                    | 1,12  | 0,98  | 1,02  | 1,04  |
| Interferon-induced, double-stranded RNA-activated protein kinase OS=Homo sapiens GN=EIF2AK2 PE=1 SV=2 - [E2AK2_HUMAN]            | 0,54  | -     | 2,06  | 1,30  |
| Interleukin enhancer-binding factor 2 OS=Homo sapiens GN=ILF2 PE=1 SV=2 - [ILF2_HUMAN]                                           | 0,82  | 1,12  | 0,94  | 0,96  |
| Interleukin enhancer-binding factor 3 OS=Homo sapiens GN=ILF3 PE=1 SV=3 - [ILF3_HUMAN]                                           | 1,02  | 1,04  | 1,01  | 1,02  |
| Interleukin-18 OS=Homo sapiens GN=IL18 PE=1 SV=1 - [IL18_HUMAN]                                                                  | -     | -     | 0,82  | 0,82  |
| Isocitrate dehydrogenase [NAD] subunit alpha, mitochondrial OS=Homo sapiens GN=IDH3A PE=1 SV=1 - [IDH3A_HUMAN]                   | 2,02  | -     | -     | 2,02  |
| Isocitrate dehydrogenase [NADP] cytoplasmic OS=Homo sapiens GN=IDH1 PE=1 SV=2 - [IDHC_HUMAN]                                     | 1,02  | 1,24  | 1,12  | 1,13  |
| Isoleucine--tRNA ligase, cytoplasmic OS=Homo sapiens GN=IARS PE=1 SV=2 - [SYIC_HUMAN]                                            | 0,98  | 1,06  | 1,01  | 1,02  |
| Isoleucine--tRNA ligase, mitochondrial OS=Homo sapiens GN=IARS2 PE=1 SV=2 - [SYIM_HUMAN]                                         | 0,95  | 1,09  | 1,21  | 1,08  |
| Keratin, type I cytoskeletal 10 OS=Homo sapiens GN=KRT10 PE=1 SV=6 - [K1C10_HUMAN]                                               | 4,38  | -     | -     | 4,38  |
| Keratin, type I cytoskeletal 9 OS=Homo sapiens GN=KRT9 PE=1 SV=3 - [K1C9_HUMAN]                                                  | 16,84 | -     | -     | 16,84 |
| Keratin, type II cytoskeletal 1 OS=Homo sapiens GN=KRT1 PE=1 SV=6 - [K2C1_HUMAN]                                                 | -     | 68,50 | 16,64 | 42,57 |
| KH domain-containing, RNA-binding, signal transduction-associated protein 1 OS=Homo sapiens GN=KHDRBS1 PE=1 SV=1 - [KHDR1_HUMAN] | 1,18  | 0,88  | 1,00  | 1,02  |
| Kinectin OS=Homo sapiens GN=KTN1 PE=1 SV=1 - [KTN1_HUMAN]                                                                        | 0,96  | 0,90  | 0,82  | 0,89  |
| Kinesin-1 heavy chain OS=Homo sapiens GN=KIF5B PE=1 SV=1 - [KINH_HUMAN]                                                          | 0,89  | 1,05  | 1,23  | 1,06  |
| Kinesin-like protein KIF13A OS=Homo sapiens GN=KIF13A PE=1 SV=2 - [K113A_HUMAN]                                                  | -     | -     | 1,44  | 1,44  |
| Kinesin-like protein KIF21B OS=Homo sapiens GN=KIF21B PE=1 SV=2 - [K121B_HUMAN]                                                  | -     | 0,50  | -     | 0,50  |
| Kinesin-like protein KIF2A OS=Homo sapiens GN=KIF2A PE=1 SV=3 - [KIF2A_HUMAN]                                                    | 0,60  | 0,94  | 0,86  | 0,80  |

|                                                                                                                 |      |      |      |      |
|-----------------------------------------------------------------------------------------------------------------|------|------|------|------|
| KN motif and ankyrin repeat domain-containing protein 2 OS=Homo sapiens GN=KANK2 PE=1 SV=1 - [KANK2_HUMAN]      | -    | 0,54 | 0,57 | 0,55 |
| Lactoylglutathione lyase OS=Homo sapiens GN=GLO1 PE=1 SV=4 - [LGUL_HUMAN]                                       | 1,12 | 0,84 | 1,06 | 1,01 |
| Ladinin-1 OS=Homo sapiens GN=LAD1 PE=1 SV=2 - [LAD1_HUMAN]                                                      | -    | -    | 1,45 | 1,45 |
| Lamina-associated polypeptide 2, isoforms beta/gamma OS=Homo sapiens GN=TMPO PE=1 SV=2 - [LAP2B_HUMAN]          | 0,89 | -    | -    | 0,89 |
| Lamin-B1 OS=Homo sapiens GN=LMNB1 PE=1 SV=2 - [LMNB1_HUMAN]                                                     | 0,88 | 0,91 | 0,88 | 0,89 |
| Lamin-B2 OS=Homo sapiens GN=LMNB2 PE=1 SV=3 - [LMNB2_HUMAN]                                                     | 0,98 | 0,94 | 1,03 | 0,98 |
| Laminin subunit alpha-5 OS=Homo sapiens GN=LAMA5 PE=1 SV=8 - [LAMA5_HUMAN]                                      | 0,88 | -    | 0,39 | 0,63 |
| Laminin subunit beta-1 OS=Homo sapiens GN=LAMB1 PE=1 SV=2 - [LAMB1_HUMAN]                                       | 0,96 | 1,00 | 0,86 | 0,94 |
| Laminin subunit gamma-1 OS=Homo sapiens GN=LAMC1 PE=1 SV=3 - [LAMC1_HUMAN]                                      | 0,82 | 0,76 | 0,82 | 0,80 |
| La-related protein 1 OS=Homo sapiens GN=LARP1 PE=1 SV=2 - [LARP1_HUMAN]                                         | 1,15 | 0,89 | 1,04 | 1,02 |
| Large proline-rich protein BAG6 OS=Homo sapiens GN=BAG6 PE=1 SV=2 - [BAG6_HUMAN]                                | 0,99 | 1,66 | 1,35 | 1,33 |
| Lethal(2) giant larvae protein homolog 2 OS=Homo sapiens GN=LLGL2 PE=1 SV=2 - [LLGL2_HUMAN]                     | -    | 4,80 | -    | 4,80 |
| LETM1 and EF-hand domain-containing protein 1, mitochondrial OS=Homo sapiens GN=LETM1 PE=1 SV=1 - [LETM1_HUMAN] | 1,35 | 0,88 | 0,91 | 1,05 |
| Leucine zipper protein 1 OS=Homo sapiens GN=LUZP1 PE=1 SV=2 - [LUZP1_HUMAN]                                     | -    | 0,66 | -    | 0,66 |
| Leucine-rich PPR motif-containing protein, mitochondrial OS=Homo sapiens GN=LRPPRC PE=1 SV=3 - [LRPPRC_HUMAN]   | 0,92 | 0,93 | 0,88 | 0,91 |
| Leucine-rich repeat flightless-interacting protein 1 OS=Homo sapiens GN=LRRFIP1 PE=1 SV=2 - [LRRF1_HUMAN]       | 1,04 | 1,07 | 1,01 | 1,04 |
| Leucine-rich repeat-containing protein 41 OS=Homo sapiens GN=LRR41 PE=1 SV=3 - [LRR41_HUMAN]                    | 0,75 | -    | -    | 0,75 |
| Leucine-rich repeat-containing protein 59 OS=Homo sapiens GN=LRR59 PE=1 SV=1 - [LRR59_HUMAN]                    | 0,89 | 0,96 | 0,98 | 0,94 |
| Leucine--tRNA ligase, cytoplasmic OS=Homo sapiens GN=LARS PE=1 SV=2 - [SYLC_HUMAN]                              | 1,03 | 0,96 | 0,94 | 0,98 |
| Leucyl-cystinyl aminopeptidase OS=Homo sapiens GN=LNPEP PE=1 SV=3 - [LCAP_HUMAN]                                | 1,19 | 1,22 | 1,78 | 1,40 |
| LIM and SH3 domain protein 1 OS=Homo sapiens GN=LASP1 PE=1 SV=2 - [LASP1_HUMAN]                                 | 0,99 | 1,28 | 1,02 | 1,10 |
| Liprin-beta-1 OS=Homo sapiens GN=PPFIBP1 PE=1 SV=2 - [LIPB1_HUMAN]                                              | 0,58 | 0,84 | 1,06 | 0,83 |
| LisH domain and HEAT repeat-containing protein KIAA1468 OS=Homo sapiens GN=KIAA1468 PE=1 SV=2 - [K1468_HUMAN]   | 0,75 | 1,05 | 0,82 | 0,87 |
| L-lactate dehydrogenase A chain OS=Homo sapiens GN=LDHA PE=1 SV=2 - [LDHA_HUMAN]                                | 0,99 | 1,12 | 1,06 | 1,06 |
| L-lactate dehydrogenase B chain OS=Homo sapiens GN=LDHB PE=1 SV=2 - [LDHB_HUMAN]                                | 1,08 | 1,03 | 1,12 | 1,07 |
| Lon protease homolog, mitochondrial OS=Homo sapiens GN=LONP1 PE=1 SV=2 - [LONM_HUMAN]                           | 0,98 | 1,10 | 1,00 | 1,03 |
| Long-chain-fatty-acid--CoA ligase 3 OS=Homo sapiens GN=ACSL3 PE=1 SV=3 - [ACSL3_HUMAN]                          | -    | 1,58 | -    | 1,58 |
| Long-chain-fatty-acid--CoA ligase 4 OS=Homo sapiens GN=ACSL4 PE=1 SV=2 - [ACSL4_HUMAN]                          | 0,24 | -    | -    | 0,24 |
| Lupus La protein OS=Homo sapiens GN=SSB PE=1 SV=2 - [LA_HUMAN]                                                  | 1,15 | 1,10 | 1,07 | 1,11 |
| Lysine--tRNA ligase OS=Homo sapiens GN=KARS PE=1 SV=3 - [SYK_HUMAN]                                             | 0,86 | 1,00 | 0,96 | 0,94 |
| Lysosomal protective protein OS=Homo sapiens GN=CTSA PE=1 SV=2 - [PPGB_HUMAN]                                   | 0,90 | 0,92 | 0,90 | 0,91 |
| Lysosome membrane protein 2 OS=Homo sapiens GN=SCARB2 PE=1 SV=2 - [SCR2_HUMAN]                                  | -    | 1,85 | 1,49 | 1,67 |
| Lysosome-associated membrane glycoprotein 1 OS=Homo sapiens GN=LAMP1 PE=1 SV=3 - [LAMP1_HUMAN]                  | 0,89 | 1,11 | 0,96 | 0,99 |
| Lysosome-associated membrane glycoprotein 2 OS=Homo sapiens GN=LAMP2 PE=1 SV=2 - [LAMP2_HUMAN]                  | 0,96 | 1,24 | 1,05 | 1,08 |
| Macrophage migration inhibitory factor OS=Homo sapiens GN=MIF PE=1 SV=4 - [MIF_HUMAN]                           | 0,99 | 0,97 | 1,00 | 0,99 |
| Magnesium transporter protein 1 OS=Homo sapiens GN=MAGT1 PE=1 SV=1 - [MAGT1_HUMAN]                              | -    | 1,94 | -    | 1,94 |
| Major vault protein OS=Homo sapiens GN=MVP PE=1 SV=4 - [MVP_HUMAN]                                              | 1,21 | 1,14 | 1,25 | 1,20 |
| Malate dehydrogenase, cytoplasmic OS=Homo sapiens GN=MDH1 PE=1 SV=4 - [MDHC_HUMAN]                              | 1,07 | 1,01 | 1,03 | 1,03 |
| Malate dehydrogenase, mitochondrial OS=Homo sapiens GN=MDH2 PE=1 SV=3 - [MDHM_HUMAN]                            | 1,18 | 1,16 | 1,22 | 1,19 |
| Mannosyl-oligosaccharide glucosidase OS=Homo sapiens GN=MOGS PE=1 SV=5 - [MOGS_HUMAN]                           | 1,09 | -    | -    | 1,09 |
| Matrin-3 OS=Homo sapiens GN=MATR3 PE=1 SV=2 - [MATR3_HUMAN]                                                     | 0,96 | 0,99 | 1,02 | 0,99 |
| Mediator of DNA damage checkpoint protein 1 OS=Homo sapiens GN=MDC1 PE=1 SV=3 - [MDC1_HUMAN]                    | 1,34 | 1,47 | -    | 1,41 |
| Melanoma inhibitory activity protein 3 OS=Homo sapiens GN=MIA3 PE=1 SV=1 - [MIA3_HUMAN]                         | 9,35 | -    | -    | 9,35 |
| Metallothionein-2 OS=Homo sapiens GN=MT2A PE=1 SV=1 - [MT2_HUMAN]                                               | 1,82 | 2,79 | -    | 2,31 |
| Methionine--tRNA ligase, cytoplasmic OS=Homo sapiens GN=MARS PE=1 SV=2 - [SYMC_HUMAN]                           | 1,15 | 1,08 | 1,21 | 1,15 |
| Methylcrotonoyl-CoA carboxylase beta chain, mitochondrial OS=Homo sapiens GN=MCCC2 PE=1 SV=1 - [MCCB_HUMAN]     | -    | 0,35 | -    | 0,35 |
| Microsomal glutathione S-transferase 3 OS=Homo sapiens GN=MGST3 PE=1 SV=1 - [MGST3_HUMAN]                       | 0,90 | 0,85 | 0,86 | 0,87 |

|                                                                                                                              |      |      |      |      |
|------------------------------------------------------------------------------------------------------------------------------|------|------|------|------|
| Microtubule-associated protein 1S OS=Homo sapiens GN=MAP1S PE=1 SV=2 - [MAP1S_HUMAN]                                         | 1,29 | -    | -    | 1,29 |
| Microtubule-associated protein 4 OS=Homo sapiens GN=MAP4 PE=1 SV=3 - [MAP4_HUMAN]                                            | 1,13 | 1,14 | 1,22 | 1,16 |
| Microtubule-associated protein RP/EB family member 1 OS=Homo sapiens GN=MAPRE1 PE=1 SV=3 - [MARE1_HUMAN]                     | 1,27 | 1,48 | -    | 1,38 |
| Minor histocompatibility antigen H13 OS=Homo sapiens GN=HM13 PE=1 SV=1 - [HM13_HUMAN]                                        | 1,85 | 1,29 | -    | 1,57 |
| Missshapen-like kinase 1 OS=Homo sapiens GN=MINK1 PE=1 SV=2 - [MINK1_HUMAN]                                                  | -    | -    | 1,55 | 1,55 |
| Mitochondrial 2-oxoglutarate/malate carrier protein OS=Homo sapiens GN=SLC25A11 PE=1 SV=3 - [M2OM_HUMAN]                     | -    | 3,87 | -    | 3,87 |
| Mitochondrial import receptor subunit TOM22 homolog OS=Homo sapiens GN=TOMM22 PE=1 SV=3 - [TOM22_HUMAN]                      | 1,30 | 0,95 | 1,14 | 1,13 |
| Mitochondrial import receptor subunit TOM40 homolog OS=Homo sapiens GN=TOMM40 PE=1 SV=1 - [TOM40_HUMAN]                      | 0,83 | 0,84 | -    | 0,83 |
| Mitochondrial import receptor subunit TOM70 OS=Homo sapiens GN=TOMM70A PE=1 SV=1 - [TOM70_HUMAN]                             | 1,55 | 1,03 | 1,22 | 1,27 |
| Mitochondrial inner membrane protein OS=Homo sapiens GN=IMMT PE=1 SV=1 - [IMMT_HUMAN]                                        | 0,86 | 0,96 | 1,04 | 0,96 |
| Mitochondrial-processing peptidase subunit alpha OS=Homo sapiens GN=PMPCA PE=1 SV=2 - [MPPA_HUMAN]                           | -    | -    | 0,88 | 0,88 |
| Mitochondrial-processing peptidase subunit beta OS=Homo sapiens GN=PMPCB PE=1 SV=2 - [MPPB_HUMAN]                            | 0,64 | -    | -    | 0,64 |
| Mitogen-activated protein kinase 1 OS=Homo sapiens GN=MAPK1 PE=1 SV=3 - [MK01_HUMAN]                                         | 1,03 | -    | -    | 1,03 |
| Mitotic checkpoint protein BUB3 OS=Homo sapiens GN=BUB3 PE=1 SV=1 - [BUB3_HUMAN]                                             | 1,10 | 0,90 | 1,14 | 1,05 |
| Mitotic spindle assembly checkpoint protein MAD1 OS=Homo sapiens GN=MAD1L1 PE=1 SV=2 - [MD1L1_HUMAN]                         | -    | 2,57 | -    | 2,57 |
| MMS19 nucleotide excision repair protein homolog OS=Homo sapiens GN=MMS19 PE=1 SV=2 - [MMS19_HUMAN]                          | 1,44 | 1,65 | 1,40 | 1,50 |
| Modulator of apoptosis 1 OS=Homo sapiens GN=MOAP1 PE=1 SV=1 - [MOAP1_HUMAN]                                                  | -    | -    | 0,82 | 0,82 |
| Moesin OS=Homo sapiens GN=MSN PE=1 SV=3 - [MOES_HUMAN]                                                                       | 1,00 | 0,82 | 1,13 | 0,98 |
| Multidrug resistance protein 1 OS=Homo sapiens GN=ABCB1 PE=1 SV=3 - [MDR1_HUMAN]                                             | 0,85 | 0,75 | 0,87 | 0,82 |
| Multifunctional protein ADE2 OS=Homo sapiens GN=PAICS PE=1 SV=3 - [PUR6_HUMAN]                                               | 0,91 | 0,96 | 0,93 | 0,93 |
| Myb-binding protein 1A OS=Homo sapiens GN=MYBBP1A PE=1 SV=2 - [MBB1A_HUMAN]                                                  | 0,93 | 1,05 | 1,11 | 1,03 |
| Myc box-dependent-interacting protein 1 OS=Homo sapiens GN=BIN1 PE=1 SV=1 - [BIN1_HUMAN]                                     | -    | 1,22 | -    | 1,22 |
| Myoferlin OS=Homo sapiens GN=MYOF PE=1 SV=1 - [MYOF_HUMAN]                                                                   | 0,97 | 1,08 | 1,04 | 1,03 |
| Myosin light polypeptide 6 OS=Homo sapiens GN=MYL6 PE=1 SV=2 - [MYL6_HUMAN]                                                  | 1,04 | 0,86 | 0,89 | 0,93 |
| Myosin-10 OS=Homo sapiens GN=MYH10 PE=1 SV=3 - [MYH10_HUMAN]                                                                 | 1,12 | 1,10 | 1,12 | 1,11 |
| Myosin-9 OS=Homo sapiens GN=MYH9 PE=1 SV=4 - [MYH9_HUMAN]                                                                    | 1,07 | 1,07 | 1,06 | 1,07 |
| N-acetylglucosamine-6-sulfatase OS=Homo sapiens GN=GNS PE=1 SV=3 - [GNS_HUMAN]                                               | 1,77 | 2,06 | 2,40 | 2,08 |
| N-acetyltransferase 10 OS=Homo sapiens GN=NAT10 PE=1 SV=2 - [NAT10_HUMAN]                                                    | 1,25 | 2,32 | 1,11 | 1,56 |
| NAD(P)H dehydrogenase [quinone] 1 OS=Homo sapiens GN=NQO1 PE=1 SV=1 - [NQO1_HUMAN]                                           | 1,60 | 1,41 | 1,52 | 1,51 |
| NAD-dependent malic enzyme, mitochondrial OS=Homo sapiens GN=ME2 PE=1 SV=1 - [MAOM_HUMAN]                                    | 0,88 | 1,26 | 0,89 | 1,01 |
| NADH-cytochrome b5 reductase 3 OS=Homo sapiens GN=CYB5R3 PE=1 SV=3 - [NB5R3_HUMAN]                                           | 1,67 | 1,04 | 1,65 | 1,46 |
| NADPH--cytochrome P450 reductase OS=Homo sapiens GN=POR PE=1 SV=2 - [NCPR_HUMAN]                                             | 1,12 | 1,04 | 0,96 | 1,04 |
| N-alpha-acetyltransferase 15, NatA auxiliary subunit OS=Homo sapiens GN=NAA15 PE=1 SV=1 - [NAA15_HUMAN]                      | 0,76 | 2,22 | 2,14 | 1,71 |
| Nascent polypeptide-associated complex subunit alpha, muscle-specific form OS=Homo sapiens GN=NACA PE=1 SV=1 - [NACAM_HUMAN] | 0,71 | 0,93 | 1,01 | 0,88 |
| Nck-associated protein 1 OS=Homo sapiens GN=NCKAP1 PE=1 SV=1 - [NCKP1_HUMAN]                                                 | 1,31 | 0,82 | 0,78 | 0,97 |
| NEDD8 OS=Homo sapiens GN=NEDD8 PE=1 SV=1 - [NEDD8_HUMAN]                                                                     | 1,98 | 1,52 | -    | 1,75 |
| Nesprin-1 OS=Homo sapiens GN=SYNE1 PE=1 SV=4 - [SYNE1_HUMAN]                                                                 | 0,81 | -    | -    | 0,81 |
| Neuroblast differentiation-associated protein AHNAK OS=Homo sapiens GN=AHNAK PE=1 SV=2 - [AHNK_HUMAN]                        | 1,16 | 1,05 | 1,26 | 1,16 |
| Neurolysin, mitochondrial OS=Homo sapiens GN=NLN PE=1 SV=1 - [NEUL_HUMAN]                                                    | 1,11 | -    | -    | 1,11 |
| Neuropathy target esterase OS=Homo sapiens GN=PNPLA6 PE=1 SV=2 - [PLPL6_HUMAN]                                               | 3,05 | -    | -    | 3,05 |
| Neutral alpha-glucosidase AB OS=Homo sapiens GN=GANAB PE=1 SV=3 - [GANAB_HUMAN]                                              | 1,08 | 1,07 | 1,08 | 1,08 |
| Neutral amino acid transporter B(0) OS=Homo sapiens GN=SLC1A5 PE=1 SV=2 - [AAAT_HUMAN]                                       | 0,89 | 1,08 | 1,22 | 1,07 |
| NHP2-like protein 1 OS=Homo sapiens GN=NHP2L1 PE=1 SV=3 - [NH2L1_HUMAN]                                                      | 0,66 | 0,67 | 0,76 | 0,69 |
| Niban-like protein 1 OS=Homo sapiens GN=FAM129B PE=1 SV=3 - [NIBL1_HUMAN]                                                    | 0,93 | 0,94 | 0,79 | 0,88 |
| Nicastrin OS=Homo sapiens GN=NCSTN PE=1 SV=2 - [NICA_HUMAN]                                                                  | 0,88 | -    | -    | 0,88 |
| Nicotinamide phosphoribosyltransferase OS=Homo sapiens GN=NAMPT PE=1 SV=1 - [NAMPT_HUMAN]                                    | 0,67 | 1,63 | 1,05 | 1,12 |
| Nicotinate-nucleotide pyrophosphorylase [carboxylating] OS=Homo sapiens GN=QPRT PE=1 SV=3 [NADC_HUMAN]                       | 0,18 | 1,58 | -    | 0,88 |

|                                                                                                                |      |      |      |      |
|----------------------------------------------------------------------------------------------------------------|------|------|------|------|
| Nodal modulator 1 OS=Homo sapiens GN=NOMO1 PE=1 SV=5 - [NOMO1_HUMAN]                                           | 1,23 | 0,82 | 0,95 | 1,00 |
| Non-POU domain-containing octamer-binding protein OS=Homo sapiens GN=NONO PE=1 SV=4 - [NONO_HUMAN]             | 0,98 | 0,91 | 1,02 | 0,97 |
| NSFL1 cofactor p47 OS=Homo sapiens GN=NSFL1C PE=1 SV=2 - [NSF1C_HUMAN]                                         | 1,27 | 1,55 | 1,66 | 1,49 |
| N-terminal Xaa-Pro-Lys N-methyltransferase 1 OS=Homo sapiens GN=NTMT1 PE=1 SV=3 - [NTM1A_HUMAN]                | 0,67 | -    | -    | 0,67 |
| Nuclear autoantigenic sperm protein OS=Homo sapiens GN=NASP PE=1 SV=2 - [NASP_HUMAN]                           | 0,89 | 0,94 | 0,88 | 0,90 |
| Nuclear cap-binding protein subunit 1 OS=Homo sapiens GN=NCBP1 PE=1 SV=1 - [NCBP1_HUMAN]                       | 0,94 | -    | 0,74 | 0,84 |
| Nuclear export mediator factor NEMF OS=Homo sapiens GN=NEMF PE=1 SV=4 - [NEMF_HUMAN]                           | -    | 0,84 | -    | 0,84 |
| Nuclear factor NF-kappa-B p100 subunit OS=Homo sapiens GN=NFKB2 PE=1 SV=4 - [NFKB2_HUMAN]                      | 1,28 | 0,96 | 1,35 | 1,20 |
| Nuclear fragile X mental retardation-interacting protein 2 OS=Homo sapiens GN=NUFIP2 PE=1 SV=1 - [NUFP2_HUMAN] | -    | -    | 0,25 | 0,25 |
| Nuclear migration protein nudC OS=Homo sapiens GN=NUDC PE=1 SV=1 - [NUDC_HUMAN]                                | 0,84 | 0,96 | 0,93 | 0,91 |
| Nuclear mitotic apparatus protein 1 OS=Homo sapiens GN=NUMA1 PE=1 SV=2 - [NUMA1_HUMAN]                         | 0,97 | 0,95 | 1,13 | 1,02 |
| Nuclear pore complex protein Nup107 OS=Homo sapiens GN=NUP107 PE=1 SV=1 - [NU107_HUMAN]                        | -    | 1,07 | 0,75 | 0,91 |
| Nuclear pore complex protein Nup133 OS=Homo sapiens GN=NUP133 PE=1 SV=2 - [NU133_HUMAN]                        | 1,00 | 1,22 | -    | 1,11 |
| Nuclear pore complex protein Nup153 OS=Homo sapiens GN=NUP153 PE=1 SV=2 - [NU153_HUMAN]                        | 0,93 | 1,41 | 0,61 | 0,98 |
| Nuclear pore complex protein Nup155 OS=Homo sapiens GN=NUP155 PE=1 SV=1 - [NU155_HUMAN]                        | 0,90 | 0,75 | 0,88 | 0,84 |
| Nuclear pore complex protein Nup160 OS=Homo sapiens GN=NUP160 PE=1 SV=3 - [NU160_HUMAN]                        | 0,95 | 1,07 | 1,06 | 1,03 |
| Nuclear pore complex protein Nup205 OS=Homo sapiens GN=NUP205 PE=1 SV=3 - [NU205_HUMAN]                        | 0,84 | 0,85 | 0,98 | 0,89 |
| Nuclear pore complex protein Nup214 OS=Homo sapiens GN=NUP214 PE=1 SV=2 - [NU214_HUMAN]                        | 1,36 | 1,16 | -    | 1,26 |
| Nuclear pore complex protein Nup85 OS=Homo sapiens GN=NUP85 PE=1 SV=1 - [NUP85_HUMAN]                          | 0,31 | -    | -    | 0,31 |
| Nuclear pore complex protein Nup88 OS=Homo sapiens GN=NUP88 PE=1 SV=2 - [NUP88_HUMAN]                          | 0,85 | 1,14 | 0,97 | 0,99 |
| Nuclear pore complex protein Nup93 OS=Homo sapiens GN=NUP93 PE=1 SV=2 - [NUP93_HUMAN]                          | 1,07 | 0,79 | 1,06 | 0,97 |
| Nuclear pore complex protein Nup98-Nup96 OS=Homo sapiens GN=NUP98 PE=1 SV=4 - [NUP98_HUMAN]                    | 1,23 | 0,95 | 0,83 | 1,01 |
| Nuclear protein localization protein 4 homolog OS=Homo sapiens GN=NPLOC4 PE=1 SV=3 - [NPL4_HUMAN]              | 1,57 | -    | -    | 1,57 |
| Nuclear transport factor 2 OS=Homo sapiens GN=NUTF2 PE=1 SV=1 - [NUTF2_HUMAN]                                  | 1,06 | 0,96 | 1,19 | 1,07 |
| Nuclease-sensitive element-binding protein 1 OS=Homo sapiens GN=YBX1 PE=1 SV=3 - [YBOX1_HUMAN]                 | 1,63 | 1,36 | 1,34 | 1,44 |
| Nucleolar and coiled-body phosphoprotein 1 OS=Homo sapiens GN=NOLC1 PE=1 SV=2 - [NOLC1_HUMAN]                  | 1,21 | 1,11 | 1,08 | 1,13 |
| Nucleolar complex protein 2 homolog OS=Homo sapiens GN=NOC2L PE=1 SV=4 - [NOC2L_HUMAN]                         | 0,75 | 0,42 | 0,76 | 0,65 |
| Nucleolar protein 56 OS=Homo sapiens GN=NOP56 PE=1 SV=4 - [NOP56_HUMAN]                                        | 0,67 | 0,56 | 0,79 | 0,68 |
| Nucleolar protein 58 OS=Homo sapiens GN=NOP58 PE=1 SV=1 - [NOP58_HUMAN]                                        | 1,11 | 0,99 | 1,05 | 1,05 |
| Nucleolar RNA helicase 2 OS=Homo sapiens GN=DDX21 PE=1 SV=5 - [DDX21_HUMAN]                                    | 0,95 | 0,91 | 0,93 | 0,93 |
| Nucleolar transcription factor 1 OS=Homo sapiens GN=UBTF PE=1 SV=1 - [UBF1_HUMAN]                              | 1,48 | 1,38 | 1,39 | 1,42 |
| Nucleolin OS=Homo sapiens GN=NCL PE=1 SV=3 - [NUCL_HUMAN]                                                      | 0,90 | 0,92 | 0,93 | 0,92 |
| Nucleophosmin OS=Homo sapiens GN=NPM1 PE=1 SV=2 - [NPM_HUMAN]                                                  | 1,00 | 1,18 | 1,05 | 1,07 |
| Nucleoporin NUP188 homolog OS=Homo sapiens GN=NUP188 PE=1 SV=1 - [NU188_HUMAN]                                 | 0,49 | 0,74 | -    | 0,62 |
| Nucleoprotein TPR OS=Homo sapiens GN=TPR PE=1 SV=3 - [TPR_HUMAN]                                               | 0,66 | 0,77 | 0,80 | 0,74 |
| Nucleoside diphosphate kinase A OS=Homo sapiens GN=NME1 PE=1 SV=1 - [NDKA_HUMAN]                               | 0,98 | 0,86 | 0,97 | 0,94 |
| Nucleoside diphosphate kinase B OS=Homo sapiens GN=NME2 PE=1 SV=1 - [NDKB_HUMAN]                               | 1,21 | 2,11 | 1,36 | 1,56 |
| Nucleosome assembly protein 1-like 1 OS=Homo sapiens GN=NAP1L1 PE=1 SV=1 - [NP1L1_HUMAN]                       | 1,44 | 0,94 | 1,16 | 1,18 |
| Nucleosome assembly protein 1-like 4 OS=Homo sapiens GN=NAP1L4 PE=1 SV=1 - [NP1L4_HUMAN]                       | 1,30 | 1,03 | 1,11 | 1,15 |
| Nucleus accumbens-associated protein 1 OS=Homo sapiens GN=NACC1 PE=1 SV=1 - [NACC1_HUMAN]                      | 0,84 | 1,12 | 0,96 | 0,97 |
| NudC domain-containing protein 1 OS=Homo sapiens GN=NUDCD1 PE=1 SV=2 - [NUDC1_HUMAN]                           | 0,99 | 1,13 | 1,55 | 1,22 |
| Obg-like ATPase 1 OS=Homo sapiens GN=OLA1 PE=1 SV=2 - [OLA1_HUMAN]                                             | -    | 1,10 | -    | 1,10 |
| Opioid growth factor receptor OS=Homo sapiens GN=OGFR PE=1 SV=3 - [OGFR_HUMAN]                                 | -    | 1,31 | -    | 1,31 |
| Osteopontin OS=Homo sapiens GN=SPP1 PE=1 SV=1 - [OSTP_HUMAN]                                                   | 0,64 | 1,09 | -    | 0,86 |
| Oxysterol-binding protein 1 OS=Homo sapiens GN=OSBP PE=1 SV=1 - [OSBP1_HUMAN]                                  | 1,39 | 1,70 | 1,38 | 1,49 |

|                                                                                                                    |      |      |      |      |
|--------------------------------------------------------------------------------------------------------------------|------|------|------|------|
| Oxysterol-binding protein-related protein 8 OS=Homo sapiens GN=OSBPL8 PE=1 SV=3 - [OSBL8_HUMAN]                    | 0,78 | -    | -    | 0,78 |
| PC4 and SFRS1-interacting protein OS=Homo sapiens GN=PSIP1 PE=1 SV=1 - [PSIP1_HUMAN]                               | 1,08 | 1,25 | 0,99 | 1,10 |
| PDZ and LIM domain protein 1 OS=Homo sapiens GN=PDLIM1 PE=1 SV=4 - [PDLI1_HUMAN]                                   | 2,71 | -    | 1,12 | 1,91 |
| PDZ and LIM domain protein 5 OS=Homo sapiens GN=PDLIM5 PE=1 SV=5 - [PDLI5_HUMAN]                                   | 0,87 | -    | -    | 0,87 |
| PDZ and LIM domain protein 7 OS=Homo sapiens GN=PDLIM7 PE=1 SV=1 - [PDLI7_HUMAN]                                   | 1,16 | 1,45 | 1,05 | 1,22 |
| Peptidyl-prolyl cis-trans isomerase A OS=Homo sapiens GN=PPIA PE=1 SV=2 - [PPIA_HUMAN]                             | 1,04 | 0,95 | 1,00 | 0,99 |
| Peptidyl-prolyl cis-trans isomerase B OS=Homo sapiens GN=PPIB PE=1 SV=2 - [PPIB_HUMAN]                             | 0,56 | 0,76 | 0,91 | 0,75 |
| Peptidyl-prolyl cis-trans isomerase FKBP10 OS=Homo sapiens GN=FKBP10 PE=1 SV=1 - [FKB10_HUMAN]                     | 0,94 | 0,91 | 0,55 | 0,80 |
| Peptidyl-prolyl cis-trans isomerase FKBP1A OS=Homo sapiens GN=FKBP1A PE=1 SV=2 - [FKB1A_HUMAN]                     | 0,79 | 0,78 | 0,80 | 0,79 |
| Peptidyl-prolyl cis-trans isomerase FKBP2 OS=Homo sapiens GN=FKBP2 PE=1 SV=2 - [FKBP2_HUMAN]                       | 1,76 | -    | -    | 1,76 |
| Peptidyl-prolyl cis-trans isomerase FKBP4 OS=Homo sapiens GN=FKBP4 PE=1 SV=3 - [FKBP4_HUMAN]                       | 1,09 | 1,15 | 1,10 | 1,12 |
| Peptidyl-prolyl cis-trans isomerase FKBP8 OS=Homo sapiens GN=FKBP8 PE=1 SV=2 - [FKBP8_HUMAN]                       | 1,76 | 1,93 | -    | 1,85 |
| Pericentriolar material 1 protein OS=Homo sapiens GN=PCM1 PE=1 SV=4 - [PCM1_HUMAN]                                 | -    | 0,95 | -    | 0,95 |
| Perilipin-3 OS=Homo sapiens GN=PLIN3 PE=1 SV=3 - [PLIN3_HUMAN]                                                     | 1,73 | 1,40 | 2,23 | 1,79 |
| Periodic tryptophan protein 2 homolog OS=Homo sapiens GN=PWP2 PE=1 SV=2 - [PWP2_HUMAN]                             | -    | 1,16 | -    | 1,16 |
| Peroxiredoxin-1 OS=Homo sapiens GN=PRDX1 PE=1 SV=1 - [PRDX1_HUMAN]                                                 | 1,04 | 1,04 | 1,28 | 1,12 |
| Peroxiredoxin-2 OS=Homo sapiens GN=PRDX2 PE=1 SV=5 - [PRDX2_HUMAN]                                                 | 1,24 | 0,95 | 1,21 | 1,14 |
| Peroxiredoxin-4 OS=Homo sapiens GN=PRDX4 PE=1 SV=1 - [PRDX4_HUMAN]                                                 | 1,18 | 0,83 | 1,00 | 1,00 |
| Peroxiredoxin-5, mitochondrial OS=Homo sapiens GN=PRDX5 PE=1 SV=4 - [PRDX5_HUMAN]                                  | 1,36 | 0,74 | 2,14 | 1,41 |
| Peroxiredoxin-6 OS=Homo sapiens GN=PRDX6 PE=1 SV=3 - [PRDX6_HUMAN]                                                 | 1,31 | 1,35 | 1,20 | 1,29 |
| Peroxisomal multifunctional enzyme type 2 OS=Homo sapiens GN=HSD17B4 PE=1 SV=3 - [DHB4_HUMAN]                      | 0,94 | 1,07 | 1,10 | 1,03 |
| PERQ amino acid-rich with GYF domain-containing protein 2 OS=Homo sapiens GN=GIGYF2 PE=1 SV=1 - [PERQ2_HUMAN]      | 0,99 | -    | 0,95 | 0,97 |
| Pescadillo homolog OS=Homo sapiens GN=PES1 PE=1 SV=1 - [PESC_HUMAN]                                                | 0,88 | -    | -    | 0,88 |
| PHD finger-like domain-containing protein 5A OS=Homo sapiens GN=PHF5A PE=1 SV=1 - [PHF5A_HUMAN]                    | 0,82 | 0,82 | -    | 0,82 |
| Phenylalanine-tRNA ligase alpha subunit OS=Homo sapiens GN=FARSA PE=1 SV=3 - [SYFA_HUMAN]                          | 9,01 | -    | -    | 9,01 |
| Phenylalanine-tRNA ligase beta subunit OS=Homo sapiens GN=FARSB PE=1 SV=3 - [SYFB_HUMAN]                           | 2,30 | -    | -    | 2,30 |
| Phosphate carrier protein, mitochondrial OS=Homo sapiens GN=SLC25A3 PE=1 SV=2 - [MPCP_HUMAN]                       | 0,82 | 0,84 | 0,97 | 0,88 |
| Phosphatidylethanolamine-binding protein 1 OS=Homo sapiens GN=PEBP1 PE=1 SV=3 - [PEBP1_HUMAN]                      | 0,92 | 1,50 | 2,01 | 1,48 |
| Phosphatidylinositol transfer protein beta isoform OS=Homo sapiens GN=PITPNB PE=1 SV=2 - [PIPNB_HUMAN]             | -    | 1,50 | 1,72 | 1,61 |
| Phosphatidylinositol-3,4,5-trisphosphate 5-phosphatase 2 OS=Homo sapiens GN=INPPL1 PE=1 SV=2 - [SHIP2_HUMAN]       | 2,55 | -    | -    | 2,55 |
| Phosphoenolpyruvate carboxykinase [GTP], mitochondrial OS=Homo sapiens GN=PCK2 PE=1 SV=3 - [PCKGM_HUMAN]           | 1,14 | 1,13 | 1,01 | 1,09 |
| Phosphoglucomutase-like protein 5 OS=Homo sapiens GN=PGM5 PE=1 SV=2 - [PGM5_HUMAN]                                 | 0,98 | 1,73 | -    | 1,36 |
| Phosphoglycerate kinase 1 OS=Homo sapiens GN=PGK1 PE=1 SV=3 - [PGK1_HUMAN]                                         | 1,24 | 1,18 | 1,31 | 1,24 |
| Phosphoglycerate mutase 1 OS=Homo sapiens GN=PGAM1 PE=1 SV=2 - [PGAM1_HUMAN]                                       | 1,49 | 1,20 | 1,29 | 1,33 |
| Phosphoribosylformylglycinamide synthase OS=Homo sapiens GN=PFAS PE=1 SV=4 - [PUR4_HUMAN]                          | 1,07 | 1,00 | 1,10 | 1,06 |
| Phosphoserine aminotransferase OS=Homo sapiens GN=PSAT1 PE=1 SV=2 - [SERC_HUMAN]                                   | 0,98 | 0,93 | 0,90 | 0,94 |
| Pinin OS=Homo sapiens GN=PNN PE=1 SV=4 - [PININ_HUMAN]                                                             | 0,63 | -    | -    | 0,63 |
| Plasma membrane calcium-transporting ATPase 1 OS=Homo sapiens GN=ATP2B1 PE=1 SV=3 - [AT2B1_HUMAN]                  | 0,88 | -    | -    | 0,88 |
| Plasma membrane calcium-transporting ATPase 4 OS=Homo sapiens GN=ATP2B4 PE=1 SV=2 - [AT2B4_HUMAN]                  | 1,03 | -    | -    | 1,03 |
| Plasminogen activator inhibitor 1 RNA-binding protein OS=Homo sapiens GN=SERBP1 PE=1 SV=2 - [PAIRB_HUMAN]          | 0,23 | -    | -    | 0,23 |
| Plastin-3 OS=Homo sapiens GN=PLS3 PE=1 SV=4 - [PLST_HUMAN]                                                         | 0,92 | 0,98 | 1,03 | 0,98 |
| Platelet-activating factor acetylhydrolase IB subunit alpha OS=Homo sapiens GN=PFAFAH1B1 PE=1 SV=2 - [LIS1_HUMAN]  | -    | 1,81 | 1,13 | 1,47 |
| Platelet-activating factor acetylhydrolase IB subunit gamma OS=Homo sapiens GN=PFAFAH1B3 PE=1 SV=1 - [PA1B3_HUMAN] | 1,12 | -    | -    | 1,12 |
| Pleckstrin homology-like domain family B member 1 OS=Homo sapiens GN=PHLDB1 PE=1 SV=1 - [PHL1_HUMAN]               | 0,99 | -    | -    | 0,99 |
| Plectin OS=Homo sapiens GN=PLEC PE=1 SV=3 - [PLEC_HUMAN]                                                           | 0,98 | 0,89 | 1,05 | 0,97 |
| Plexin-B2 OS=Homo sapiens GN=PLXNB2 PE=1 SV=3 - [PLXB2_HUMAN]                                                      | 0,95 | -    | -    | 0,95 |

|                                                                                                         |      |      |      |      |
|---------------------------------------------------------------------------------------------------------|------|------|------|------|
| Podocalyxin OS=Homo sapiens GN=PODXL PE=1 SV=2 - [PODXL_HUMAN]                                          | 0,88 | 0,91 | -    | 0,89 |
| Poly [ADP-ribose] polymerase 1 OS=Homo sapiens GN=PARP1 PE=1 SV=4 - [PARP1_HUMAN]                       | 1,08 | 1,07 | 1,09 | 1,08 |
| Poly [ADP-ribose] polymerase 4 OS=Homo sapiens GN=PARP4 PE=1 SV=3 - [PARP4_HUMAN]                       | 0,94 | -    | -    | 0,94 |
| Poly(A) polymerase gamma OS=Homo sapiens GN=PAPOLG PE=1 SV=2 - [PAPOG_HUMAN]                            | 0,98 | -    | -    | 0,98 |
| Poly(rC)-binding protein 1 OS=Homo sapiens GN=PCBP1 PE=1 SV=2 - [PCBP1_HUMAN]                           | 0,92 | 1,22 | 0,94 | 1,03 |
| Poly(rC)-binding protein 2 OS=Homo sapiens GN=PCBP2 PE=1 SV=1 - [PCBP2_HUMAN]                           | 1,11 | -    | 0,84 | 0,97 |
| Poly(rC)-binding protein 3 OS=Homo sapiens GN=PCBP3 PE=2 SV=2 - [PCBP3_HUMAN]                           | 0,84 | -    | -    | 0,84 |
| Polyadenylate-binding protein 1 OS=Homo sapiens GN=PABPC1 PE=1 SV=2 - [PABP1_HUMAN]                     | 0,73 | 0,67 | 0,72 | 0,71 |
| Polyadenylate-binding protein 4 OS=Homo sapiens GN=PABPC4 PE=1 SV=1 - [PABP4_HUMAN]                     | 0,88 | 0,59 | 0,86 | 0,78 |
| Polypyrimidine tract-binding protein 1 OS=Homo sapiens GN=PTBP1 PE=1 SV=1 - [PTBP1_HUMAN]               | 1,11 | 0,96 | 1,10 | 1,06 |
| Prefoldin subunit 3 OS=Homo sapiens GN=VBP1 PE=1 SV=3 - [PFD3_HUMAN]                                    | 1,05 | -    | -    | 1,05 |
| Prelamin-A/C OS=Homo sapiens GN=LMNA PE=1 SV=1 - [LMNA_HUMAN]                                           | 0,95 | 0,95 | 0,97 | 0,96 |
| pre-mRNA 3' end processing protein WDR33 OS=Homo sapiens GN=WDR33 PE=1 SV=2 - [WDR33_HUMAN]             | 0,83 | 0,66 | 1,23 | 0,91 |
| Pre-mRNA-processing factor 19 OS=Homo sapiens GN=PRPF19 PE=1 SV=1 - [PRP19_HUMAN]                       | 1,22 | 1,24 | 0,90 | 1,12 |
| Pre-mRNA-processing factor 40 homolog A OS=Homo sapiens GN=PRPF40A PE=1 SV=2 - [PR40A_HUMAN]            | -    | -    | 0,75 | 0,75 |
| Pre-mRNA-processing factor 6 OS=Homo sapiens GN=PRPF6 PE=1 SV=1 - [PRP6_HUMAN]                          | 1,24 | 1,01 | 0,96 | 1,07 |
| Pre-mRNA-processing-splicing factor 8 OS=Homo sapiens GN=PRPF8 PE=1 SV=2 - [PRP8_HUMAN]                 | 0,91 | 1,08 | 0,96 | 0,99 |
| pre-rRNA processing protein FTSJ3 OS=Homo sapiens GN=FTSJ3 PE=1 SV=2 - [SPB1_HUMAN]                     | 0,93 | 1,07 | 0,87 | 0,96 |
| Pre-rRNA-processing protein TSR1 homolog OS=Homo sapiens GN=TSR1 PE=1 SV=1 - [TSR1_HUMAN]               | 1,16 | -    | -    | 1,16 |
| Presequence protease, mitochondrial OS=Homo sapiens GN=PITRM1 PE=1 SV=3 - [PREP_HUMAN]                  | 1,38 | 1,22 | -    | 1,30 |
| PRK2 apoptosis WT1 regulator protein OS=Homo sapiens GN=PAWR PE=1 SV=1 - [PAWR_HUMAN]                   | 1,02 | -    | 0,86 | 0,94 |
| Probable ATP-dependent RNA helicase DDX17 OS=Homo sapiens GN=DDX17 PE=1 SV=2 - [DDX17_HUMAN]            | 1,04 | 1,11 | 1,09 | 1,08 |
| Probable ATP-dependent RNA helicase DDX23 OS=Homo sapiens GN=DDX23 PE=1 SV=3 - [DDX23_HUMAN]            | -    | 0,63 | -    | 0,63 |
| Probable ATP-dependent RNA helicase DDX46 OS=Homo sapiens GN=DDX46 PE=1 SV=2 - [DDX46_HUMAN]            | 0,78 | -    | -    | 0,78 |
| Probable ATP-dependent RNA helicase DDX5 OS=Homo sapiens GN=DDX5 PE=1 SV=1 - [DDX5_HUMAN]               | 0,38 | 0,54 | 0,52 | 0,48 |
| Probable ATP-dependent RNA helicase DDX6 OS=Homo sapiens GN=DDX6 PE=1 SV=2 - [DDX6_HUMAN]               | 1,58 | 1,37 | 1,43 | 1,46 |
| Probable ATP-dependent RNA helicase DHX36 OS=Homo sapiens GN=DHX36 PE=1 SV=2 - [DHX36_HUMAN]            | 0,68 | 0,49 | 0,61 | 0,59 |
| Probable cation-transporting ATPase 13A1 OS=Homo sapiens GN=ATP13A1 PE=1 SV=2 - [AT131_HUMAN]           | -    | 1,10 | -    | 1,10 |
| Probable ubiquitin carboxyl-terminal hydrolase FAF-X OS=Homo sapiens GN=USP9X PE=1 SV=3 - [USP9X_HUMAN] | 0,76 | -    | 0,85 | 0,81 |
| Probable ubiquitin carboxyl-terminal hydrolase FAF-Y OS=Homo sapiens GN=USP9Y PE=1 SV=2 - [USP9Y_HUMAN] | -    | 0,73 | -    | 0,73 |
| Procollagen galactosyltransferase 1 OS=Homo sapiens GN=COLGALT1 PE=1 SV=1 - [GT251_HUMAN]               | 1,19 | 1,27 | 1,19 | 1,22 |
| Procollagen-lysine,2-oxoglutarate 5-dioxygenase 1 OS=Homo sapiens GN=PLOD1 PE=1 SV=2 - [PLOD1_HUMAN]    | 0,84 | 0,79 | 0,76 | 0,80 |
| Profilin-1 OS=Homo sapiens GN=PFN1 PE=1 SV=2 - [PROF1_HUMAN]                                            | 1,02 | 1,00 | 1,03 | 1,02 |
| Profilin-2 OS=Homo sapiens GN=PFN2 PE=1 SV=3 - [PROF2_HUMAN]                                            | -    | 0,84 | 1,00 | 0,92 |
| Programmed cell death 6-interacting protein OS=Homo sapiens GN=PDCD6IP PE=1 SV=1 - [PDC6I_HUMAN]        | 0,88 | 1,00 | 0,91 | 0,93 |
| Prohibitin OS=Homo sapiens GN=PHB PE=1 SV=1 - [PHB_HUMAN]                                               | 1,14 | 1,14 | 1,03 | 1,10 |
| Prohibitin-2 OS=Homo sapiens GN=PHB2 PE=1 SV=2 - [PHB2_HUMAN]                                           | 0,87 | 0,93 | 1,00 | 0,93 |
| Proliferating cell nuclear antigen OS=Homo sapiens GN=PCNA PE=1 SV=1 - [PCNA_HUMAN]                     | 0,95 | 0,88 | 0,93 | 0,92 |
| Proliferation-associated protein 2G4 OS=Homo sapiens GN=PA2G4 PE=1 SV=3 - [PA2G4_HUMAN]                 | 0,87 | 0,89 | 0,87 | 0,88 |
| Proline dehydrogenase 1, mitochondrial OS=Homo sapiens GN=PRODH PE=1 SV=3 - [PROD_HUMAN]                | 0,80 | 0,92 | 0,79 | 0,84 |
| Prolyl 3-hydroxylase 1 OS=Homo sapiens GN=LEPRE1 PE=1 SV=2 - [P3H1_HUMAN]                               | 0,78 | 0,99 | -    | 0,88 |
| Prolyl 4-hydroxylase subunit alpha-1 OS=Homo sapiens GN=P4HA1 PE=1 SV=2 - [P4HA1_HUMAN]                 | 0,77 | 0,63 | 0,93 | 0,78 |
| Prosaposin OS=Homo sapiens GN=PSAP PE=1 SV=2 - [SAP_HUMAN]                                              | 1,69 | -    | -    | 1,69 |
| Prostaglandin E synthase 3 OS=Homo sapiens GN=PTGES3 PE=1 SV=1 - [TEBP_HUMAN]                           | 0,93 | 0,64 | 0,73 | 0,77 |
| Prostaglandin reductase 1 OS=Homo sapiens GN=PTGR1 PE=1 SV=2 - [PTGR1_HUMAN]                            | -    | -    | 0,79 | 0,79 |



|                                                                                                                        |      |      |      |      |
|------------------------------------------------------------------------------------------------------------------------|------|------|------|------|
| Proteasomal ubiquitin receptor ADRM1 OS=Homo sapiens GN=ADRM1 PE=1 SV=2 - [ADRM1_HUMAN]                                | -    | 0,85 | -    | 0,85 |
| Proteasome activator complex subunit 1 OS=Homo sapiens GN=PSME1 PE=1 SV=1 - [PSME1_HUMAN]                              | 1,04 | 1,35 | 0,97 | 1,12 |
| Proteasome activator complex subunit 2 OS=Homo sapiens GN=PSME2 PE=1 SV=4 - [PSME2_HUMAN]                              | 0,91 | 0,69 | 0,86 | 0,82 |
| Proteasome subunit alpha type-1 OS=Homo sapiens GN=PSMA1 PE=1 SV=1 - [PSA1_HUMAN]                                      | 0,84 | 0,76 | 0,97 | 0,86 |
| Proteasome subunit alpha type-2 OS=Homo sapiens GN=PSMA2 PE=1 SV=2 - [PSA2_HUMAN]                                      | 1,46 | 1,64 | 1,77 | 1,62 |
| Proteasome subunit alpha type-3 OS=Homo sapiens GN=PSMA3 PE=1 SV=2 - [PSA3_HUMAN]                                      | 1,09 | 0,99 | 0,83 | 0,97 |
| Proteasome subunit alpha type-4 OS=Homo sapiens GN=PSMA4 PE=1 SV=1 - [PSA4_HUMAN]                                      | 1,29 | 1,39 | 0,79 | 1,16 |
| Proteasome subunit alpha type-5 OS=Homo sapiens GN=PSMA5 PE=1 SV=3 - [PSA5_HUMAN]                                      | 0,96 | 1,12 | 0,98 | 1,02 |
| Proteasome subunit alpha type-6 OS=Homo sapiens GN=PSMA6 PE=1 SV=1 - [PSA6_HUMAN]                                      | 0,83 | 0,75 | 0,83 | 0,80 |
| Proteasome subunit alpha type-7 OS=Homo sapiens GN=PSMA7 PE=1 SV=1 - [PSA7_HUMAN]                                      | 0,98 | 1,16 | 1,03 | 1,06 |
| Proteasome subunit beta type-1 OS=Homo sapiens GN=PSMB1 PE=1 SV=2 - [PSB1_HUMAN]                                       | 0,98 | 0,74 | 0,52 | 0,75 |
| Proteasome subunit beta type-2 OS=Homo sapiens GN=PSMB2 PE=1 SV=1 - [PSB2_HUMAN]                                       | 0,96 | 1,09 | 0,96 | 1,01 |
| Proteasome subunit beta type-3 OS=Homo sapiens GN=PSMB3 PE=1 SV=2 - [PSB3_HUMAN]                                       | -    | 0,82 | 0,96 | 0,89 |
| Proteasome subunit beta type-4 OS=Homo sapiens GN=PSMB4 PE=1 SV=4 - [PSB4_HUMAN]                                       | 1,26 | 1,60 | 1,47 | 1,44 |
| Proteasome subunit beta type-5 OS=Homo sapiens GN=PSMB5 PE=1 SV=3 - [PSB5_HUMAN]                                       | 1,04 | 0,79 | 0,83 | 0,89 |
| Proteasome subunit beta type-6 OS=Homo sapiens GN=PSMB6 PE=1 SV=4 - [PSB6_HUMAN]                                       | 1,08 | 1,18 | 1,12 | 1,12 |
| Proteasome subunit beta type-7 OS=Homo sapiens GN=PSMB7 PE=1 SV=1 - [PSB7_HUMAN]                                       | 0,77 | 0,94 | 0,80 | 0,83 |
| Proteasome-associated protein ECM29 homolog OS=Homo sapiens GN=ECM29 PE=1 SV=2 - [ECM29_HUMAN]                         | 1,02 | 1,28 | 1,38 | 1,23 |
| Protein arginine N-methyltransferase 1 OS=Homo sapiens GN=PRMT1 PE=1 SV=2 - [ANM1_HUMAN]                               | 0,76 | -    | 2,08 | 1,42 |
| Protein arginine N-methyltransferase 5 OS=Homo sapiens GN=PRMT5 PE=1 SV=4 - [ANM5_HUMAN]                               | 1,38 | 1,47 | -    | 1,43 |
| Protein canopy homolog 2 OS=Homo sapiens GN=CNPY2 PE=1 SV=1 - [CNPY2_HUMAN]                                            | 0,78 | 0,78 | -    | 0,78 |
| Protein DEK OS=Homo sapiens GN=DEK PE=1 SV=1 - [DEK_HUMAN]                                                             | 1,20 | 0,72 | 0,69 | 0,87 |
| Protein diaphanous homolog 1 OS=Homo sapiens GN=DIAPH1 PE=1 SV=2 - [DIAP1_HUMAN]                                       | 0,95 | 1,03 | 1,33 | 1,10 |
| Protein disulfide-isomerase A3 OS=Homo sapiens GN=PDIA3 PE=1 SV=4 - [PDIA3_HUMAN]                                      | 1,12 | 1,08 | 1,14 | 1,11 |
| Protein disulfide-isomerase A4 OS=Homo sapiens GN=PDIA4 PE=1 SV=2 - [PDIA4_HUMAN]                                      | 0,95 | 0,98 | 0,94 | 0,96 |
| Protein disulfide-isomerase A6 OS=Homo sapiens GN=PDIA6 PE=1 SV=1 - [PDIA6_HUMAN]                                      | 1,09 | 1,01 | 1,07 | 1,06 |
| Protein disulfide-isomerase OS=Homo sapiens GN=P4HB PE=1 SV=3 - [PDIA1_HUMAN]                                          | 0,99 | 0,97 | 0,95 | 0,97 |
| Protein DJ-1 OS=Homo sapiens GN=PARK7 PE=1 SV=2 - [PARK7_HUMAN]                                                        | 0,92 | 1,01 | 1,51 | 1,15 |
| Protein enabled homolog OS=Homo sapiens GN=ENAH PE=1 SV=2 - [ENAH_HUMAN]                                               | 0,61 | -    | -    | 0,61 |
| Protein flightless-1 homolog OS=Homo sapiens GN=FLII PE=1 SV=2 - [FLII_HUMAN]                                          | 0,92 | 1,04 | 1,48 | 1,15 |
| Protein HEXIM1 OS=Homo sapiens GN=HEXIM1 PE=1 SV=1 - [HEX1_HUMAN]                                                      | 0,71 | 0,95 | -    | 0,83 |
| Protein Hook homolog 1 OS=Homo sapiens GN=HOOK1 PE=1 SV=2 - [HOOK1_HUMAN]                                              | 0,52 | -    | -    | 0,52 |
| Protein KIAA0664 OS=Homo sapiens GN=KIAA0664 PE=1 SV=2 - [K0664_HUMAN]                                                 | 1,13 | -    | -    | 1,13 |
| Protein kinase C and casein kinase substrate in neurons protein 2 OS=Homo sapiens GN=PACSIN2 PE=1 SV=2 - [PACN2_HUMAN] | 1,67 | 0,86 | 1,10 | 1,21 |
| Protein KRI1 homolog OS=Homo sapiens GN=KRI1 PE=1 SV=3 - [KRI1_HUMAN]                                                  | -    | 0,90 | 0,79 | 0,85 |
| Protein LYRIC OS=Homo sapiens GN=MTDH PE=1 SV=2 - [LYRIC_HUMAN]                                                        | 0,60 | 0,86 | 0,83 | 0,76 |
| Protein MAL2 OS=Homo sapiens GN=MAL2 PE=1 SV=1 - [MAL2_HUMAN]                                                          | -    | 1,93 | -    | 1,93 |
| Protein Niban OS=Homo sapiens GN=FAM129A PE=1 SV=1 - [NIBAN_HUMAN]                                                     | 0,79 | 0,90 | 1,11 | 0,93 |
| Protein PAT1 homolog 1 OS=Homo sapiens GN=PATL1 PE=1 SV=2 - [PATL1_HUMAN]                                              | -    | 1,25 | 1,09 | 1,17 |
| Protein phosphatase 1 regulatory subunit 12A OS=Homo sapiens GN=PPP1R12A PE=1 SV=1 - [MYPT1_HUMAN]                     | 0,81 | 1,01 | 0,91 | 0,91 |
| Protein phosphatase 1G OS=Homo sapiens GN=PPM1G PE=1 SV=1 - [PPM1G_HUMAN]                                              | 0,80 | 1,05 | 0,86 | 0,90 |
| Protein PRRC2C OS=Homo sapiens GN=PRRC2C PE=1 SV=4 - [PRC2C_HUMAN]                                                     | -    | -    | 1,37 | 1,37 |
| Protein RCC2 OS=Homo sapiens GN=RCC2 PE=1 SV=2 - [RCC2_HUMAN]                                                          | 0,71 | 0,67 | 0,73 | 0,70 |
| Protein RRP5 homolog OS=Homo sapiens GN=PCDC11 PE=1 SV=3 - [RRP5_HUMAN]                                                | 0,89 | 0,87 | 0,96 | 0,91 |
| Protein S100-A11 OS=Homo sapiens GN=S100A11 PE=1 SV=2 - [S10AB_HUMAN]                                                  | 0,94 | 0,87 | 0,88 | 0,90 |
| Protein S100-A4 OS=Homo sapiens GN=S100A4 PE=1 SV=1 - [S10A4_HUMAN]                                                    | 1,16 | 1,06 | 1,03 | 1,09 |
| Protein S100-A6 OS=Homo sapiens GN=S100A6 PE=1 SV=1 - [S10A6_HUMAN]                                                    | 1,03 | -    | -    | 1,03 |
| Protein scribble homolog OS=Homo sapiens GN=SCRIB PE=1 SV=4 - [SCRIB_HUMAN]                                            | 1,66 | 0,65 | -    | 1,15 |

|                                                                                                                                                      |      |      |      |      |
|------------------------------------------------------------------------------------------------------------------------------------------------------|------|------|------|------|
| Protein SET OS=Homo sapiens GN=SET PE=1 SV=3 - [SET_HUMAN]                                                                                           | 1,13 | 1,02 | 1,09 | 1,08 |
| Protein TBG4 OS=Homo sapiens GN=TBG4 PE=1 SV=1 - [TBG4_HUMAN]                                                                                        | 1,71 | -    | -    | 1,71 |
| Protein TFG OS=Homo sapiens GN=TFG PE=1 SV=2 - [TFG_HUMAN]                                                                                           | 1,06 | 0,85 | 0,94 | 0,95 |
| Protein transport protein Sec16A OS=Homo sapiens GN=SEC16A PE=1 SV=3 - [SC16A_HUMAN]                                                                 | 0,74 | 1,34 | 1,59 | 1,22 |
| Protein transport protein Sec23A OS=Homo sapiens GN=SEC23A PE=1 SV=2 - [SC23A_HUMAN]                                                                 | 1,23 | -    | 1,37 | 1,30 |
| Protein transport protein Sec23B OS=Homo sapiens GN=SEC23B PE=1 SV=2 - [SC23B_HUMAN]                                                                 | 1,20 | 1,38 | 1,48 | 1,35 |
| Protein transport protein Sec24A OS=Homo sapiens GN=SEC24A PE=1 SV=2 - [SC24A_HUMAN]                                                                 | 0,71 | -    | 1,68 | 1,19 |
| Protein transport protein Sec24B OS=Homo sapiens GN=SEC24B PE=1 SV=2 - [SC24B_HUMAN]                                                                 | 1,51 | -    | -    | 1,51 |
| Protein transport protein Sec24C OS=Homo sapiens GN=SEC24C PE=1 SV=3 - [SC24C_HUMAN]                                                                 | 1,69 | 1,49 | 1,62 | 1,60 |
| Protein transport protein Sec24D OS=Homo sapiens GN=SEC24D PE=1 SV=2 - [SC24D_HUMAN]                                                                 | 0,94 | 0,85 | 1,04 | 0,94 |
| Protein transport protein Sec61 subunit alpha isoform 1 OS=Homo sapiens GN=SEC61A1 PE=1 SV=2 - [S61A1_HUMAN]                                         | 0,43 | -    | -    | 0,43 |
| Protein transport protein Sec61 subunit beta OS=Homo sapiens GN=SEC61B PE=1 SV=2 - [SC61B_HUMAN]                                                     | 0,65 | -    | 0,62 | 0,64 |
| Protein unc-45 homolog A OS=Homo sapiens GN=UNC45A PE=1 SV=1 - [UN45A_HUMAN]                                                                         | 0,78 | 0,90 | 1,03 | 0,90 |
| Protein YIPF5 OS=Homo sapiens GN=YIPF5 PE=1 SV=1 - [YIPF5_HUMAN]                                                                                     | 1,06 | -    | -    | 1,06 |
| Prothymosin alpha OS=Homo sapiens GN=PTMA PE=1 SV=2 - [PTMA_HUMAN]                                                                                   | 1,32 | -    | -    | 1,32 |
| Purine nucleoside phosphorylase OS=Homo sapiens GN=PNP PE=1 SV=2 - [PNPH_HUMAN]                                                                      | 0,87 | 0,88 | -    | 0,88 |
| Puromycin-sensitive aminopeptidase OS=Homo sapiens GN=NPEPPS PE=1 SV=2 - [PSA_HUMAN]                                                                 | 1,03 | 1,09 | 1,12 | 1,08 |
| Putative adenosylhomocysteinase 2 OS=Homo sapiens GN=AHCYL1 PE=1 SV=2 - [SAHH2_HUMAN]                                                                | -    | 2,49 | 1,21 | 1,85 |
| Putative ATP-dependent RNA helicase DHX30 OS=Homo sapiens GN=DHX30 PE=1 SV=1 - [DHX30_HUMAN]                                                         | 1,15 | 1,53 | 0,89 | 1,19 |
| Putative coiled-coil-helix-coiled-coil-helix domain-containing protein CHCHD2P9, mitochondrial OS=Homo sapiens GN=CHCHD2P9 PE=5 SV=1 - [CHCH9_HUMAN] | 1,31 | -    | -    | 1,31 |
| Putative heat shock protein HSP 90-beta 4 OS=Homo sapiens GN=HSP90AB4P PE=5 SV=1 - [H90B4_HUMAN]                                                     | 0,99 | 0,99 | 0,82 | 0,94 |
| Putative heat shock protein HSP 90-beta-3 OS=Homo sapiens GN=HSP90AB3P PE=5 SV=1 - [H90B3_HUMAN]                                                     | -    | 1,99 | -    | 1,99 |
| Putative helicase MOV-10 OS=Homo sapiens GN=MOV10 PE=1 SV=2 - [MOV10_HUMAN]                                                                          | 1,35 | 1,19 | 1,33 | 1,29 |
| Putative hexokinase HKDC1 OS=Homo sapiens GN=HKDC1 PE=1 SV=3 - [HKDC1_HUMAN]                                                                         | 0,82 | 0,78 | 0,78 | 0,79 |
| Putative pre-mRNA-splicing factor ATP-dependent RNA helicase DHX15 OS=Homo sapiens GN=DHX15 PE=1 SV=2 - [DHX15_HUMAN]                                | 0,69 | 0,85 | 0,75 | 0,77 |
| Putative ribosomal RNA methyltransferase NOP2 OS=Homo sapiens GN=NOP2 PE=1 SV=2 - [NOP2_HUMAN]                                                       | 0,95 | 1,07 | 0,95 | 0,99 |
| Putative RNA-binding protein 15 OS=Homo sapiens GN=RBM15 PE=1 SV=2 - [RBM15_HUMAN]                                                                   | 2,53 | -    | -    | 2,53 |
| Pyridoxal kinase OS=Homo sapiens GN=PD XK PE=1 SV=1 - [PD XK_HUMAN]                                                                                  | -    | 2,00 | 5,47 | 3,74 |
| Pyridoxal-dependent decarboxylase domain-containing protein 1 OS=Homo sapiens GN=PD XDC1 PE=1 SV=2 - [PD XD1_HUMAN]                                  | 1,66 | -    | -    | 1,66 |
| Pyroline-5-carboxylate reductase 1, mitochondrial OS=Homo sapiens GN=PYCR1 PE=1 SV=2 - [P5CR1_HUMAN]                                                 | 0,95 | 0,97 | 0,84 | 0,92 |
| Pyruvate dehydrogenase E1 component subunit alpha, somatic form, mitochondrial OS=Homo sapiens GN=PDHA1 PE=1 SV=3 - [ODPA_HUMAN]                     | 0,78 | 0,82 | 0,56 | 0,72 |
| Pyruvate dehydrogenase E1 component subunit beta, mitochondrial OS=Homo sapiens GN=PDHB PE=1 SV=3 - [ODPB_HUMAN]                                     | -    | 1,20 | 1,29 | 1,24 |
| Pyruvate dehydrogenase phosphatase regulatory subunit, mitochondrial OS=Homo sapiens GN=PDPR PE=1 SV=2 - [PDPR_HUMAN]                                | 1,48 | -    | -    | 1,48 |
| Pyruvate kinase PKM OS=Homo sapiens GN=PKM PE=1 SV=4 - [KP YM_HUMAN]                                                                                 | 1,09 | 1,10 | 1,11 | 1,10 |
| Quinone oxidoreductase OS=Homo sapiens GN=CRYZ PE=1 SV=1 - [QOR_HUMAN]                                                                               | 1,50 | 1,31 | 1,39 | 1,40 |
| Rab GDP dissociation inhibitor alpha OS=Homo sapiens GN=GDI1 PE=1 SV=2 - [GDIA_HUMAN]                                                                | 1,05 | 1,27 | 1,21 | 1,18 |
| Rab GDP dissociation inhibitor beta OS=Homo sapiens GN=GDI2 PE=1 SV=2 - [GDIB_HUMAN]                                                                 | 1,07 | 1,13 | 1,24 | 1,15 |
| Rab GTPase-activating protein 1 OS=Homo sapiens GN=RABGAP1 PE=1 SV=3 - [RBGP1_HUMAN]                                                                 | 3,44 | 2,80 | 1,47 | 2,57 |
| Rab11 family-interacting protein 1 OS=Homo sapiens GN=RAB11FIP1 PE=1 SV=3 - [RFIP1_HUMAN]                                                            | -    | 0,71 | -    | 0,71 |
| Ran GTPase-activating protein 1 OS=Homo sapiens GN=RANGAP1 PE=1 SV=1 - [RAGP1_HUMAN]                                                                 | 0,72 | -    | 0,49 | 0,60 |
| Ran-binding protein 10 OS=Homo sapiens GN=RANBP10 PE=1 SV=1 - [RBP10_HUMAN]                                                                          | -    | -    | 0,76 | 0,76 |
| Ran-binding protein 3 OS=Homo sapiens GN=RANBP3 PE=1 SV=1 - [RANB3_HUMAN]                                                                            | 0,97 | 0,86 | 1,00 | 0,94 |
| Ran-specific GTPase-activating protein OS=Homo sapiens GN=RANBP1 PE=1 SV=1 - [RANG_HUMAN]                                                            | 0,85 | 1,02 | 1,74 | 1,21 |
| Rap1 GTPase-GDP dissociation stimulator 1 OS=Homo sapiens GN=RAP1GDS1 PE=1 SV=3 - [GDS1_HUMAN]                                                       | -    | 0,40 | 0,37 | 0,39 |
| Ras GTPase-activating protein-binding protein 1 OS=Homo sapiens GN=G3BP1 PE=1 SV=1 - [G3BP1_HUMAN]                                                   | 0,87 | 0,75 | 0,54 | 0,72 |

|                                                                                                     |      |      |      |      |
|-----------------------------------------------------------------------------------------------------|------|------|------|------|
| Ras GTPase-activating-like protein IQGAP1 OS=Homo sapiens GN=IQGAP1 PE=1 SV=1 - [IQGA1_HUMAN]       | 0,97 | 0,98 | 0,97 | 0,97 |
| Ras-related C3 botulinum toxin substrate 2 OS=Homo sapiens GN=RAC2 PE=1 SV=1 - [RAC2_HUMAN]         | -    | 0,77 | 0,91 | 0,84 |
| Ras-related protein Rab-10 OS=Homo sapiens GN=RAB10 PE=1 SV=1 - [RAB10_HUMAN]                       | 0,63 | 0,47 | 0,69 | 0,60 |
| Ras-related protein Rab-11B OS=Homo sapiens GN=RAB11B PE=1 SV=4 - [RB11B_HUMAN]                     | 1,14 | 1,04 | 1,13 | 1,10 |
| Ras-related protein Rab-14 OS=Homo sapiens GN=RAB14 PE=1 SV=4 - [RAB14_HUMAN]                       | 1,25 | 1,01 | 0,78 | 1,01 |
| Ras-related protein Rab-1A OS=Homo sapiens GN=RAB1A PE=1 SV=3 - [RAB1A_HUMAN]                       | -    | 1,69 | 1,69 | 1,69 |
| Ras-related protein Rab-2A OS=Homo sapiens GN=RAB2A PE=1 SV=1 - [RAB2A_HUMAN]                       | -    | 1,66 | 0,49 | 1,07 |
| Ras-related protein Rab-5C OS=Homo sapiens GN=RAB5C PE=1 SV=2 - [RAB5C_HUMAN]                       | 1,15 | 1,23 | 1,07 | 1,15 |
| Ras-related protein Rap-1b-like protein OS=Homo sapiens PE=2 SV=1 - [RP1BL_HUMAN]                   | 1,13 | 0,78 | 0,82 | 0,91 |
| Ras-related protein R-Ras2 OS=Homo sapiens GN=RRAS2 PE=1 SV=1 - [RRAS2_HUMAN]                       | 1,05 | -    | -    | 1,05 |
| Regulator of chromosome condensation OS=Homo sapiens GN=RCC1 PE=1 SV=1 - [RCC1_HUMAN]               | 1,16 | 0,88 | 0,87 | 0,97 |
| Regulator of nonsense transcripts 1 OS=Homo sapiens GN=UPF1 PE=1 SV=2 - [RENT1_HUMAN]               | 1,02 | 0,78 | 0,85 | 0,89 |
| Replication factor C subunit 1 OS=Homo sapiens GN=RFC1 PE=1 SV=4 - [RFC1_HUMAN]                     | 0,62 | 0,74 | -    | 0,68 |
| Replication protein A 32 kDa subunit OS=Homo sapiens GN=RPA2 PE=1 SV=1 - [RFA2_HUMAN]               | 1,57 | -    | -    | 1,57 |
| Replication protein A 70 kDa DNA-binding subunit OS=Homo sapiens GN=RPA1 PE=1 SV=2 - [RFA1_HUMAN]   | 1,35 | 1,41 | 0,40 | 1,05 |
| Reticulocalbin-1 OS=Homo sapiens GN=RCN1 PE=1 SV=1 - [RCN1_HUMAN]                                   | 1,04 | 1,07 | 1,05 | 1,05 |
| Reticulon-3 OS=Homo sapiens GN=RTN3 PE=1 SV=2 - [RTN3_HUMAN]                                        | 0,94 | -    | -    | 0,94 |
| Reticulon-4 OS=Homo sapiens GN=RTN4 PE=1 SV=2 - [RTN4_HUMAN]                                        | 2,36 | 0,98 | 1,47 | 1,61 |
| Retinal dehydrogenase 1 OS=Homo sapiens GN=ALDH1A1 PE=1 SV=2 - [AL1A1_HUMAN]                        | 1,10 | 1,13 | 1,17 | 1,13 |
| Retrotransposon-derived protein PEG10 OS=Homo sapiens GN=PEG10 PE=1 SV=2 - [PEG10_HUMAN]            | -    | 0,61 | -    | 0,61 |
| Rho GDP-dissociation inhibitor 1 OS=Homo sapiens GN=ARHGDI1 PE=1 SV=3 - [GDIR1_HUMAN]               | 1,22 | -    | 2,24 | 1,73 |
| Rho GTPase-activating protein 1 OS=Homo sapiens GN=ARHGAP1 PE=1 SV=1 - [RHG01_HUMAN]                | 1,11 | 1,14 | 1,05 | 1,10 |
| Rho guanine nucleotide exchange factor 2 OS=Homo sapiens GN=ARHGEF2 PE=1 SV=4 - [ARHG2_HUMAN]       | 0,81 | 0,98 | 0,94 | 0,91 |
| Rho-associated protein kinase 2 OS=Homo sapiens GN=ROCK2 PE=1 SV=4 - [ROCK2_HUMAN]                  | -    | 0,52 | -    | 0,52 |
| Rho-related GTP-binding protein RhoC OS=Homo sapiens GN=RHOC PE=1 SV=1 - [RHOC_HUMAN]               | 0,93 | 0,94 | 1,05 | 0,97 |
| Ribonuclease inhibitor OS=Homo sapiens GN=RNH1 PE=1 SV=2 - [RINI_HUMAN]                             | 0,91 | 1,10 | 1,17 | 1,06 |
| Ribonucleases P/MRP protein subunit POP1 OS=Homo sapiens GN=POP1 PE=1 SV=2 - [POP1_HUMAN]           | 1,18 | -    | 0,86 | 1,02 |
| Ribonucleoside-diphosphate reductase large subunit OS=Homo sapiens GN=RRM1 PE=1 SV=1 - [RIR1_HUMAN] | 1,67 | -    | 0,58 | 1,13 |
| Ribose-phosphate pyrophosphokinase 2 OS=Homo sapiens GN=PRPS2 PE=1 SV=2 - [PRPS2_HUMAN]             | 2,92 | -    | -    | 2,92 |
| Ribosomal L1 domain-containing protein 1 OS=Homo sapiens GN=RSL1D1 PE=1 SV=3 - [RL1D1_HUMAN]        | -    | -    | 0,92 | 0,92 |
| Ribosome biogenesis protein BOP1 OS=Homo sapiens GN=BOP1 PE=1 SV=2 - [BOP1_HUMAN]                   | 0,98 | -    | 0,75 | 0,86 |
| Ribosome-binding protein 1 OS=Homo sapiens GN=RRBP1 PE=1 SV=4 - [RRBP1_HUMAN]                       | 0,91 | 0,91 | 0,95 | 0,92 |
| RNA-binding motif protein, X chromosome OS=Homo sapiens GN=RBMX PE=1 SV=3 - [RBMX_HUMAN]            | 0,77 | 0,71 | 0,84 | 0,77 |
| RNA-binding protein 10 OS=Homo sapiens GN=RBM10 PE=1 SV=3 - [RBM10_HUMAN]                           | 0,74 | -    | -    | 0,74 |
| RNA-binding protein 12 OS=Homo sapiens GN=RBM12 PE=1 SV=1 - [RBM12_HUMAN]                           | 1,94 | 1,35 | 0,98 | 1,42 |
| RNA-binding protein 14 OS=Homo sapiens GN=RBM14 PE=1 SV=2 - [RBM14_HUMAN]                           | 1,17 | 1,17 | 0,93 | 1,09 |
| RNA-binding protein 25 OS=Homo sapiens GN=RBM25 PE=1 SV=3 - [RBM25_HUMAN]                           | 0,85 | -    | 1,22 | 1,03 |
| RNA-binding protein 26 OS=Homo sapiens GN=RBM26 PE=1 SV=3 - [RBM26_HUMAN]                           | 1,34 | -    | -    | 1,34 |
| RNA-binding protein 28 OS=Homo sapiens GN=RBM28 PE=1 SV=3 - [RBM28_HUMAN]                           | 1,31 | 2,57 | -    | 1,94 |
| RNA-binding protein 8A OS=Homo sapiens GN=RBM8A PE=1 SV=1 - [RBM8A_HUMAN]                           | 0,47 | -    | -    | 0,47 |
| RNA-binding protein EWS OS=Homo sapiens GN=EWSR1 PE=1 SV=1 - [EWS_HUMAN]                            | 1,13 | 1,13 | 1,15 | 1,14 |
| RNA-binding protein FUS OS=Homo sapiens GN=FUS PE=1 SV=1 - [FUS_HUMAN]                              | 1,30 | 1,17 | 1,34 | 1,27 |
| RNA-binding protein Raly OS=Homo sapiens GN=RALY PE=1 SV=1 - [RALY_HUMAN]                           | 1,11 | -    | -    | 1,11 |
| rRNA 2'-O-methyltransferase fibrillarin OS=Homo sapiens GN=FBL PE=1 SV=2 - [FBRL_HUMAN]             | 1,02 | 0,87 | 0,67 | 0,85 |
| RRP12-like protein OS=Homo sapiens GN=RRP12 PE=1 SV=2 - [RRP12_HUMAN]                               | 1,00 | 1,46 | 1,49 | 1,32 |
| RuvB-like 1 OS=Homo sapiens GN=RUVBL1 PE=1 SV=1 - [RUVB1_HUMAN]                                     | 0,79 | 0,86 | 0,81 | 0,82 |
| RuvB-like 2 OS=Homo sapiens GN=RUVBL2 PE=1 SV=3 - [RUVB2_HUMAN]                                     | -    | 1,01 | 0,67 | 0,84 |
| SAFB-like transcription modulator OS=Homo sapiens GN=SLTM PE=1 SV=2 - [SLTM_HUMAN]                  | 0,58 | -    | 0,86 | 0,72 |
| SAP domain-containing ribonucleoprotein OS=Homo sapiens GN=SARNP PE=1 SV=3 - [SARNP_HUMAN]          | 1,23 | 1,33 | 1,47 | 1,34 |

|                                                                                                                                       |      |      |      |      |
|---------------------------------------------------------------------------------------------------------------------------------------|------|------|------|------|
| Sarcoplasmic/endoplasmic reticulum calcium ATPase 2 OS=Homo sapiens GN=ATP2A2 PE=1 SV=1 - [AT2A2_HUMAN]                               | 0,91 | 0,96 | 1,00 | 0,96 |
| Scaffold attachment factor B1 OS=Homo sapiens GN=SAFB PE=1 SV=4 - [SAFB1_HUMAN]                                                       | 0,71 | 1,21 | 0,93 | 0,95 |
| Secernin-1 OS=Homo sapiens GN=SCRN1 PE=1 SV=2 - [SCRN1_HUMAN]                                                                         | 1,38 | 1,74 | 1,29 | 1,47 |
| Sepiapterin reductase OS=Homo sapiens GN=SPR PE=1 SV=1 - [SPRE_HUMAN]                                                                 | 2,41 | -    | -    | 2,41 |
| Septin-11 OS=Homo sapiens GN=SEPT11 PE=1 SV=3 - [SEP11_HUMAN]                                                                         | 0,43 | -    | -    | 0,43 |
| Septin-2 OS=Homo sapiens GN=SEPT2 PE=1 SV=1 - [SEPT2_HUMAN]                                                                           | 0,93 | 0,81 | 1,39 | 1,04 |
| Septin-7 OS=Homo sapiens GN=SEPT7 PE=1 SV=2 - [SEPT7_HUMAN]                                                                           | 0,80 | -    | 0,40 | 0,60 |
| Septin-9 OS=Homo sapiens GN=SEPT9 PE=1 SV=2 - [SEPT9_HUMAN]                                                                           | 8,00 | -    | -    | 8,00 |
| Sequestosome-1 OS=Homo sapiens GN=SQSTM1 PE=1 SV=1 - [SQSTM_HUMAN]                                                                    | 0,65 | 0,93 | -    | 0,79 |
| Serine hydroxymethyltransferase, mitochondrial OS=Homo sapiens GN=SHMT2 PE=1 SV=3 - [GLYM_HUMAN]                                      | 0,87 | 1,17 | 1,04 | 1,03 |
| Serine palmitoyltransferase 1 OS=Homo sapiens GN=SPTLC1 PE=1 SV=1 - [SPTC1_HUMAN]                                                     | -    | 0,72 | -    | 0,72 |
| Serine/arginine-rich splicing factor 1 OS=Homo sapiens GN=SRSF1 PE=1 SV=2 - [SRSF1_HUMAN]                                             | 0,88 | 0,83 | 0,81 | 0,84 |
| Serine/arginine-rich splicing factor 10 OS=Homo sapiens GN=SRSF10 PE=1 SV=1 - [SRS10_HUMAN]                                           | 1,15 | 0,38 | -    | 0,76 |
| Serine/arginine-rich splicing factor 2 OS=Homo sapiens GN=SRSF2 PE=1 SV=4 - [SRSF2_HUMAN]                                             | 1,41 | 1,01 | 1,02 | 1,15 |
| Serine/arginine-rich splicing factor 3 OS=Homo sapiens GN=SRSF3 PE=1 SV=1 - [SRSF3_HUMAN]                                             | 0,92 | 1,45 | 0,95 | 1,11 |
| Serine/arginine-rich splicing factor 6 OS=Homo sapiens GN=SRSF6 PE=1 SV=2 - [SRSF6_HUMAN]                                             | 0,76 | 0,75 | 0,85 | 0,79 |
| Serine/arginine-rich splicing factor 7 OS=Homo sapiens GN=SRSF7 PE=1 SV=1 - [SRSF7_HUMAN]                                             | 0,94 | -    | 1,04 | 0,99 |
| Serine/threonine-protein kinase MRCK beta OS=Homo sapiens GN=CDC42BPB PE=1 SV=2 - [MRCKB_HUMAN]                                       | 0,88 | 1,00 | -    | 0,94 |
| Serine/threonine-protein kinase N2 OS=Homo sapiens GN=PKN2 PE=1 SV=1 - [PKN2_HUMAN]                                                   | -    | 0,76 | 0,50 | 0,63 |
| Serine/threonine-protein phosphatase 2A 55 kDa regulatory subunit B alpha isoform OS=Homo sapiens GN=PPP2R2A PE=1 SV=1 - [2ABA_HUMAN] | 1,98 | 1,63 | 0,73 | 1,45 |
| Serine/threonine-protein phosphatase 2A 65 kDa regulatory subunit A alpha isoform OS=Homo sapiens GN=PPP2R1A PE=1 SV=4 - [2AAA_HUMAN] | 1,02 | 1,05 | 1,12 | 1,06 |
| Serine/threonine-protein phosphatase 2A catalytic subunit beta isoform OS=Homo sapiens GN=PPP2CB PE=1 SV=1 - [PP2AB_HUMAN]            | 1,40 | 1,49 | 2,02 | 1,64 |
| Serine/threonine-protein phosphatase 6 regulatory subunit 3 OS=Homo sapiens GN=PPP6R3 PE=1 SV=2 - [PP6R3_HUMAN]                       | 0,72 | 0,81 | 0,76 | 0,76 |
| Serine/threonine-protein phosphatase PP1-beta catalytic subunit OS=Homo sapiens GN=PPP1CB PE=1 SV=3 - [PP1B_HUMAN]                    | -    | -    | 5,06 | 5,06 |
| Serine-threonine kinase receptor-associated protein OS=Homo sapiens GN=STRAP PE=1 SV=1 - [STRAP_HUMAN]                                | 1,97 | 1,36 | -    | 1,66 |
| Serine-tRNA ligase, cytoplasmic OS=Homo sapiens GN=SARS PE=1 SV=3 - [SYSC_HUMAN]                                                      | 1,11 | 1,00 | 0,99 | 1,03 |
| Serpin H1 OS=Homo sapiens GN=SERPINH1 PE=1 SV=2 - [SERPH_HUMAN]                                                                       | 1,03 | 1,07 | 1,04 | 1,05 |
| Serrate RNA effector molecule homolog OS=Homo sapiens GN=SRRT PE=1 SV=1 - [SRRT_HUMAN]                                                | 0,97 | 1,19 | 1,11 | 1,09 |
| S-formylglutathione hydrolase OS=Homo sapiens GN=ESD PE=1 SV=2 - [ESTD_HUMAN]                                                         | -    | 2,00 | 1,86 | 1,93 |
| SH3 domain-binding glutamic acid-rich-like protein 3 OS=Homo sapiens GN=SH3BGL3 PE=1 SV=1 - [SH3L3_HUMAN]                             | 0,55 | -    | -    | 0,55 |
| Shootin-1 OS=Homo sapiens GN=KIAA1598 PE=1 SV=4 - [SHOT1_HUMAN]                                                                       | 1,21 | 0,95 | 1,05 | 1,07 |
| Sideroflexin-1 OS=Homo sapiens GN=SFXN1 PE=1 SV=4 - [SFXN1_HUMAN]                                                                     | -    | 1,62 | 4,04 | 2,83 |
| Signal recognition particle 14 kDa protein OS=Homo sapiens GN=SRP14 PE=1 SV=2 - [SRP14_HUMAN]                                         | 0,85 | 1,00 | 0,90 | 0,92 |
| Signal recognition particle 54 kDa protein OS=Homo sapiens GN=SRP54 PE=1 SV=1 - [SRP54_HUMAN]                                         | 0,23 | -    | -    | 0,23 |
| Signal recognition particle subunit SRP68 OS=Homo sapiens GN=SRP68 PE=1 SV=2 - [SRP68_HUMAN]                                          | 0,89 | 1,00 | 0,79 | 0,89 |
| Signal recognition particle subunit SRP72 OS=Homo sapiens GN=SRP72 PE=1 SV=3 - [SRP72_HUMAN]                                          | 0,85 | 1,01 | 1,07 | 0,98 |
| Signal transducer and activator of transcription 1-alpha/beta OS=Homo sapiens GN=STAT1 PE=1 SV=2 - [STAT1_HUMAN]                      | 0,85 | 0,79 | 0,97 | 0,87 |
| Signal transducer and activator of transcription 3 OS=Homo sapiens GN=STAT3 PE=1 SV=2 - [STAT3_HUMAN]                                 | 0,64 | 1,09 | 1,14 | 0,96 |
| Signal-induced proliferation-associated protein 1 OS=Homo sapiens GN=SIPA1 PE=1 SV=1 - [SIPA1_HUMAN]                                  | -    | 0,41 | -    | 0,41 |
| Single-stranded DNA-binding protein, mitochondrial OS=Homo sapiens GN=SSBP1 PE=1 SV=1 - [SSBP_HUMAN]                                  | 0,71 | 1,19 | 0,98 | 0,96 |
| Sister chromatid cohesion protein PDS5 homolog A OS=Homo sapiens GN=PDS5A PE=1 SV=1 - [PDS5A_HUMAN]                                   | 0,99 | 0,91 | 0,84 | 0,91 |
| SLIT-ROBO Rho GTPase-activating protein 2 OS=Homo sapiens GN=SRGAP2 PE=1 SV=2 - [SRGP2_HUMAN]                                         | 1,04 | 0,86 | 0,82 | 0,91 |
| Small nuclear ribonucleoprotein E OS=Homo sapiens GN=SNRPE PE=1 SV=1 - [RUXE_HUMAN]                                                   | 0,97 | 0,90 | 1,07 | 0,98 |
| Small nuclear ribonucleoprotein F OS=Homo sapiens GN=SNRPF PE=1 SV=1 - [RUXF_HUMAN]                                                   | 1,42 | 1,18 | 1,13 | 1,24 |

|                                                                                                                           |      |      |      |      |
|---------------------------------------------------------------------------------------------------------------------------|------|------|------|------|
| Small nuclear ribonucleoprotein Sm D1 OS=Homo sapiens GN=SNRPD1 PE=1 SV=1 - [SMD1_HUMAN]                                  | -    | 3,96 | 1,46 | 2,71 |
| Small nuclear ribonucleoprotein Sm D2 OS=Homo sapiens GN=SNRPD2 PE=1 SV=1 - [SMD2_HUMAN]                                  | 0,52 | 0,68 | -    | 0,60 |
| Small nuclear ribonucleoprotein Sm D3 OS=Homo sapiens GN=SNRPD3 PE=1 SV=1 - [SMD3_HUMAN]                                  | 1,01 | 0,77 | 1,05 | 0,94 |
| Small nuclear ribonucleoprotein-associated proteins B and B' OS=Homo sapiens GN=SNRPB PE=1 SV=2 - [RSMB_HUMAN]            | -    | -    | 0,73 | 0,73 |
| Small ubiquitin-related modifier 1 OS=Homo sapiens GN=SUMO1 PE=1 SV=1 - [SUMO1_HUMAN]                                     | 0,64 | 0,60 | 0,65 | 0,63 |
| Small ubiquitin-related modifier 2 OS=Homo sapiens GN=SUMO2 PE=1 SV=3 - [SUMO2_HUMAN]                                     | 0,81 | 0,85 | 0,84 | 0,83 |
| S-methyl-5'-thioadenosine phosphorylase OS=Homo sapiens GN=MTAP PE=1 SV=2 - [MTAP_HUMAN]                                  | 1,34 | -    | -    | 1,34 |
| Sodium/potassium-transporting ATPase subunit alpha-1 OS=Homo sapiens GN=ATP1A1 PE=1 SV=1 - [AT1A1_HUMAN]                  | 1,21 | 1,00 | 1,14 | 1,12 |
| Sodium-coupled neutral amino acid transporter 1 OS=Homo sapiens GN=SLC38A1 PE=1 SV=1 - [S38A1_HUMAN]                      | 0,74 | 1,22 | -    | 0,98 |
| Sodium-coupled neutral amino acid transporter 2 OS=Homo sapiens GN=SLC38A2 PE=1 SV=2 - [S38A2_HUMAN]                      | 1,59 | -    | -    | 1,59 |
| Sorcin OS=Homo sapiens GN=SRI PE=1 SV=1 - [SORCN_HUMAN]                                                                   | 0,83 | 0,86 | 1,04 | 0,91 |
| Sorting nexin-2 OS=Homo sapiens GN=SNX2 PE=1 SV=2 - [SNX2_HUMAN]                                                          | 0,89 | 0,96 | 1,04 | 0,96 |
| Spectrin alpha chain, non-erythrocytic 1 OS=Homo sapiens GN=SPTAN1 PE=1 SV=3 - [SPTN1_HUMAN]                              | 1,05 | 1,08 | 1,01 | 1,05 |
| Spectrin beta chain, non-erythrocytic 1 OS=Homo sapiens GN=SPTBN1 PE=1 SV=2 - [SPTB2_HUMAN]                               | 0,91 | 0,80 | 0,96 | 0,89 |
| Spliceosome RNA helicase DDX39B OS=Homo sapiens GN=DDX39B PE=1 SV=1 - [DX39B_HUMAN]                                       | 0,93 | 1,08 | 1,73 | 1,25 |
| Splicing factor 1 OS=Homo sapiens GN=SF1 PE=1 SV=4 - [SF01_HUMAN]                                                         | 1,24 | -    | 1,79 | 1,51 |
| Splicing factor 3A subunit 1 OS=Homo sapiens GN=SF3A1 PE=1 SV=1 - [SF3A1_HUMAN]                                           | 0,94 | 0,89 | 0,90 | 0,91 |
| Splicing factor 3A subunit 3 OS=Homo sapiens GN=SF3A3 PE=1 SV=1 - [SF3A3_HUMAN]                                           | -    | 1,08 | 1,19 | 1,13 |
| Splicing factor 3B subunit 1 OS=Homo sapiens GN=SF3B1 PE=1 SV=3 - [SF3B1_HUMAN]                                           | 0,89 | 1,08 | 1,11 | 1,03 |
| Splicing factor 3B subunit 2 OS=Homo sapiens GN=SF3B2 PE=1 SV=2 - [SF3B2_HUMAN]                                           | 1,14 | 1,06 | 1,02 | 1,07 |
| Splicing factor 3B subunit 3 OS=Homo sapiens GN=SF3B3 PE=1 SV=4 - [SF3B3_HUMAN]                                           | 1,00 | 0,89 | 1,07 | 0,99 |
| Splicing factor U2AF 35 kDa subunit OS=Homo sapiens GN=U2AF1 PE=1 SV=3 - [U2AF1_HUMAN]                                    | 0,83 | 0,80 | 0,83 | 0,82 |
| Splicing factor U2AF 65 kDa subunit OS=Homo sapiens GN=U2AF2 PE=1 SV=4 - [U2AF2_HUMAN]                                    | 1,45 | -    | 1,44 | 1,44 |
| Splicing factor, proline- and glutamine-rich OS=Homo sapiens GN=SFPQ PE=1 SV=2 - [SFPQ_HUMAN]                             | 1,04 | 1,11 | 0,99 | 1,05 |
| Squamous cell carcinoma antigen recognized by T-cells 3 OS=Homo sapiens GN=SART3 PE=1 SV=1 - [SART3_HUMAN]                | 1,27 | 1,39 | 1,18 | 1,28 |
| Src substrate cortactin OS=Homo sapiens GN=CTTN PE=1 SV=2 - [SRC8_HUMAN]                                                  | 0,91 | 0,87 | 0,96 | 0,91 |
| SRSF protein kinase 3 OS=Homo sapiens GN=SRPK3 PE=1 SV=2 - [SRPK3_HUMAN]                                                  | -    | -    | 0,72 | 0,72 |
| Staphylococcal nuclease domain-containing protein 1 OS=Homo sapiens GN=SND1 PE=1 SV=1 - [SND1_HUMAN]                      | 1,13 | 1,02 | 1,04 | 1,06 |
| Stathmin OS=Homo sapiens GN=STMN1 PE=1 SV=3 - [STMN1_HUMAN]                                                               | 1,15 | 0,94 | 1,12 | 1,07 |
| STE20-like serine/threonine-protein kinase OS=Homo sapiens GN=SLK PE=1 SV=1 - [SLK_HUMAN]                                 | -    | 0,75 | -    | 0,75 |
| Stomatin-like protein 2, mitochondrial OS=Homo sapiens GN=STOML2 PE=1 SV=1 - [STML2_HUMAN]                                | 1,35 | 1,66 | 1,36 | 1,46 |
| Stress-70 protein, mitochondrial OS=Homo sapiens GN=HSPA9 PE=1 SV=2 - [GRP75_HUMAN]                                       | 0,97 | 0,98 | 0,92 | 0,96 |
| Stress-induced-phosphoprotein 1 OS=Homo sapiens GN=STIP1 PE=1 SV=1 - [STIP1_HUMAN]                                        | 0,95 | 0,98 | 0,96 | 0,96 |
| Structural maintenance of chromosomes protein 1A OS=Homo sapiens GN=SMC1A PE=1 SV=2 - [SMC1A_HUMAN]                       | 0,80 | 0,83 | 0,75 | 0,80 |
| Structural maintenance of chromosomes protein 2 OS=Homo sapiens GN=SMC2 PE=1 SV=2 - [SMC2_HUMAN]                          | 0,71 | 1,54 | 1,35 | 1,20 |
| Structural maintenance of chromosomes protein 3 OS=Homo sapiens GN=SMC3 PE=1 SV=2 - [SMC3_HUMAN]                          | 2,35 | 0,99 | 0,91 | 1,42 |
| Structural maintenance of chromosomes protein 4 OS=Homo sapiens GN=SMC4 PE=1 SV=2 - [SMC4_HUMAN]                          | 0,61 | 0,77 | 0,78 | 0,72 |
| Succinate dehydrogenase [ubiquinone] flavoprotein subunit, mitochondrial OS=Homo sapiens GN=SDHA PE=1 SV=2 - [SDHA_HUMAN] | 1,11 | 1,38 | 1,47 | 1,32 |
| Succinyl-CoA ligase [ADP-forming] subunit beta, mitochondrial OS=Homo sapiens GN=SUCLA2 PE=1 SV=3 - [SUCB1_HUMAN]         | -    | 1,43 | -    | 1,43 |
| Succinyl-CoA ligase [GDP-forming] subunit beta, mitochondrial OS=Homo sapiens GN=SUCLG2 PE=1 SV=2 - [SUCB2_HUMAN]         | -    | 0,53 | -    | 0,53 |
| Sulfatase-modifying factor 2 OS=Homo sapiens GN=SUMF2 PE=1 SV=2 - [SUMF2_HUMAN]                                           | 1,04 | 1,10 | 1,06 | 1,07 |
| SUMO-activating enzyme subunit 1 OS=Homo sapiens GN=SAE1 PE=1 SV=1 - [SAE1_HUMAN]                                         | 2,50 | -    | -    | 2,50 |
| SUMO-activating enzyme subunit 2 OS=Homo sapiens GN=UBA2 PE=1 SV=2 - [SAE2_HUMAN]                                         | -    | 0,70 | 0,81 | 0,76 |
| SUMO-conjugating enzyme UBC9 OS=Homo sapiens GN=UBE2I PE=1 SV=1 - [UBC9_HUMAN]                                            | -    | -    | 1,27 | 1,27 |

|                                                                                                                                                    |       |      |      |       |
|----------------------------------------------------------------------------------------------------------------------------------------------------|-------|------|------|-------|
| SUN domain-containing protein 1 OS=Homo sapiens GN=SUN1 PE=1 SV=3 - [SUN1_HUMAN]                                                                   | 2,49  | 1,65 | 1,17 | 1,77  |
| Superkiller viralicidal activity 2-like 2 OS=Homo sapiens GN=SKIV2L2 PE=1 SV=3 - [SK2L2_HUMAN]                                                     | 2,32  | 0,73 | 1,01 | 1,35  |
| Superoxide dismutase [Cu-Zn] OS=Homo sapiens GN=SOD1 PE=1 SV=2 - [SODC_HUMAN]                                                                      | 1,09  | 0,98 | 1,16 | 1,08  |
| Superoxide dismutase [Mn], mitochondrial OS=Homo sapiens GN=SOD2 PE=1 SV=2 - [SODM_HUMAN]                                                          | 1,38  | 1,19 | 1,42 | 1,33  |
| Surfeit locus protein 4 OS=Homo sapiens GN=SURF4 PE=1 SV=3 - [SURF4_HUMAN]                                                                         | 0,99  | 0,98 | 1,12 | 1,03  |
| SURP and G-patch domain-containing protein 2 OS=Homo sapiens GN=SUGP2 PE=1 SV=2 - [SUGP2_HUMAN]                                                    | 0,76  | -    | -    | 0,76  |
| SWI/SNF complex subunit SMARCC2 OS=Homo sapiens GN=SMARCC2 PE=1 SV=1 - [SMRC2_HUMAN]                                                               | 0,71  | 1,01 | -    | 0,86  |
| SWI/SNF-related matrix-associated actin-dependent regulator of chromatin subfamily A member 5 OS=Homo sapiens GN=SMARCA5 PE=1 SV=1 - [SMCA5_HUMAN] | 0,84  | 0,75 | 0,75 | 0,78  |
| Symplekin OS=Homo sapiens GN=SYMPK PE=1 SV=2 - [SYMPK_HUMAN]                                                                                       | 1,26  | 1,95 | 0,76 | 1,33  |
| Synaptic vesicle membrane protein VAT-1 homolog OS=Homo sapiens GN=VAT1 PE=1 SV=2 - [VAT1_HUMAN]                                                   | 1,07  | 1,02 | 1,35 | 1,15  |
| Syntaxin-7 OS=Homo sapiens GN=STX7 PE=1 SV=4 - [STX7_HUMAN]                                                                                        | -     | -    | 1,04 | 1,04  |
| Syntaxin-binding protein 2 OS=Homo sapiens GN=STXBP2 PE=1 SV=2 - [STXB2_HUMAN]                                                                     | 1,02  | 1,04 | -    | 1,03  |
| Talin-1 OS=Homo sapiens GN=TLN1 PE=1 SV=3 - [TLN1_HUMAN]                                                                                           | 1,20  | 1,12 | 1,19 | 1,17  |
| Talin-2 OS=Homo sapiens GN=TLN2 PE=1 SV=4 - [TLN2_HUMAN]                                                                                           | 0,94  | 1,61 | 0,82 | 1,13  |
| TAR DNA-binding protein 43 OS=Homo sapiens GN=TARDBP PE=1 SV=1 - [TADBP_HUMAN]                                                                     | 1,01  | 1,07 | 0,98 | 1,02  |
| TATA-binding protein-associated factor 2N OS=Homo sapiens GN=TAF15 PE=1 SV=1 - [RBP56_HUMAN]                                                       | 1,02  | 0,93 | 1,03 | 0,99  |
| T-box brain protein 1 OS=Homo sapiens GN=TBR1 PE=1 SV=1 - [TBR1_HUMAN]                                                                             | 1,00  | 0,74 | 0,78 | 0,84  |
| T-complex protein 1 subunit alpha OS=Homo sapiens GN=TCP1 PE=1 SV=1 - [TCPA_HUMAN]                                                                 | 0,99  | 1,01 | 0,96 | 0,99  |
| T-complex protein 1 subunit beta OS=Homo sapiens GN=CCT2 PE=1 SV=4 - [TCPB_HUMAN]                                                                  | 0,88  | 0,89 | 0,94 | 0,90  |
| T-complex protein 1 subunit delta OS=Homo sapiens GN=CCT4 PE=1 SV=4 - [TCPD_HUMAN]                                                                 | 0,97  | 0,93 | 0,91 | 0,93  |
| T-complex protein 1 subunit epsilon OS=Homo sapiens GN=CCT5 PE=1 SV=1 - [TCPE_HUMAN]                                                               | 0,89  | 1,11 | 1,00 | 1,00  |
| T-complex protein 1 subunit eta OS=Homo sapiens GN=CCT7 PE=1 SV=2 - [TCPH_HUMAN]                                                                   | 0,99  | 0,91 | 1,01 | 0,97  |
| T-complex protein 1 subunit gamma OS=Homo sapiens GN=CCT3 PE=1 SV=4 - [TCPG_HUMAN]                                                                 | 0,94  | 1,00 | 0,92 | 0,95  |
| T-complex protein 1 subunit theta OS=Homo sapiens GN=CCT8 PE=1 SV=4 - [TCPQ_HUMAN]                                                                 | 0,95  | 0,95 | 0,90 | 0,94  |
| T-complex protein 1 subunit zeta OS=Homo sapiens GN=CCT6A PE=1 SV=3 - [TCPZ_HUMAN]                                                                 | 1,02  | 1,02 | 0,95 | 1,00  |
| Tensin-3 OS=Homo sapiens GN=TNS3 PE=1 SV=2 - [TENS3_HUMAN]                                                                                         | 0,70  | 0,87 | 1,29 | 0,95  |
| Testin OS=Homo sapiens GN=TES PE=1 SV=1 - [TES_HUMAN]                                                                                              | 1,36  | 1,50 | 1,06 | 1,31  |
| Thioredoxin domain-containing protein 17 OS=Homo sapiens GN=TXNDC17 PE=1 SV=1 - [TXD17_HUMAN]                                                      | -     | -    | 0,88 | 0,88  |
| Thioredoxin domain-containing protein 5 OS=Homo sapiens GN=TXNDC5 PE=1 SV=2 - [TXND5_HUMAN]                                                        | 1,03  | 1,03 | 1,41 | 1,16  |
| Thioredoxin OS=Homo sapiens GN=TXN PE=1 SV=3 - [THIO_HUMAN]                                                                                        | 0,89  | 0,89 | 0,97 | 0,92  |
| Thioredoxin reductase 1, cytoplasmic OS=Homo sapiens GN=TXNRD1 PE=1 SV=3 - [TRXR1_HUMAN]                                                           | 1,08  | 1,37 | 0,99 | 1,15  |
| Thioredoxin-dependent peroxide reductase, mitochondrial OS=Homo sapiens GN=PRDX3 PE=1 SV=3 - [PRDX3_HUMAN]                                         | 1,17  | 0,91 | 1,34 | 1,14  |
| Thioredoxin-like protein 1 OS=Homo sapiens GN=TXNL1 PE=1 SV=3 - [TXNL1_HUMAN]                                                                      | 19,30 | -    | 1,04 | 10,17 |
| THO complex subunit 4 OS=Homo sapiens GN=ALYREF PE=1 SV=3 - [THOC4_HUMAN]                                                                          | 0,67  | -    | -    | 0,67  |
| Threonine--tRNA ligase, cytoplasmic OS=Homo sapiens GN=TARS PE=1 SV=3 - [SYTC_HUMAN]                                                               | 1,15  | 0,96 | 0,94 | 1,01  |
| Thyroid hormone receptor-associated protein 3 OS=Homo sapiens GN=THRAP3 PE=1 SV=2 - [TR150_HUMAN]                                                  | 1,00  | 1,04 | 1,10 | 1,05  |
| Tight junction protein ZO-1 OS=Homo sapiens GN=TJP1 PE=1 SV=3 - [ZO1_HUMAN]                                                                        | -     | 2,52 | 1,46 | 1,99  |
| Torsin-1A-interacting protein 1 OS=Homo sapiens GN=TOR1AIP1 PE=1 SV=2 - [TOIP1_HUMAN]                                                              | 1,53  | 1,42 | 1,39 | 1,45  |
| Transaldolase OS=Homo sapiens GN=TALDO1 PE=1 SV=2 - [TALDO_HUMAN]                                                                                  | 0,91  | 0,96 | 0,93 | 0,93  |
| Transcription elongation factor A protein 1 OS=Homo sapiens GN=TCEA1 PE=1 SV=2 - [TCEA1_HUMAN]                                                     | 0,86  | 1,01 | 0,91 | 0,93  |
| Transcription elongation factor SPT5 OS=Homo sapiens GN=SUPT5H PE=1 SV=1 - [SPT5H_HUMAN]                                                           | 1,09  | 0,93 | 0,86 | 0,96  |
| Transcription intermediary factor 1-alpha OS=Homo sapiens GN=TRIM24 PE=1 SV=3 - [TIF1A_HUMAN]                                                      | 0,66  | -    | -    | 0,66  |
| Transcription intermediary factor 1-beta OS=Homo sapiens GN=TRIM28 PE=1 SV=5 - [TIF1B_HUMAN]                                                       | 0,87  | 0,82 | 1,04 | 0,91  |
| Transcriptional repressor p66-alpha OS=Homo sapiens GN=GATAD2A PE=1 SV=1 - [P66A_HUMAN]                                                            | -     | 1,65 | 1,58 | 1,61  |
| Transducin beta-like protein 2 OS=Homo sapiens GN=TBL2 PE=1 SV=1 - [TBL2_HUMAN]                                                                    | 1,18  | -    | 0,65 | 0,92  |
| Transducin beta-like protein 3 OS=Homo sapiens GN=TBL3 PE=1 SV=2 - [TBL3_HUMAN]                                                                    | 0,62  | 0,72 | 0,48 | 0,60  |
| Transferrin receptor protein 1 OS=Homo sapiens GN=TFRC PE=1 SV=2 - [TFR1_HUMAN]                                                                    | 0,82  | 0,76 | 0,84 | 0,81  |

|                                                                                                        |      |      |      |      |
|--------------------------------------------------------------------------------------------------------|------|------|------|------|
| Transformer-2 protein homolog alpha OS=Homo sapiens GN=TRA2A PE=1 SV=1 - [TRA2A_HUMAN]                 | -    | -    | 0,56 | 0,56 |
| Transformer-2 protein homolog beta OS=Homo sapiens GN=TRA2B PE=1 SV=1 - [TRA2B_HUMAN]                  | 0,67 | -    | -    | 0,67 |
| Transforming protein RhoA OS=Homo sapiens GN=RHOA PE=1 SV=1 - [RHOA_HUMAN]                             | 0,71 | 0,35 | 0,86 | 0,64 |
| Transgelin-2 OS=Homo sapiens GN=TAGLN2 PE=1 SV=3 - [TAGL2_HUMAN]                                       | 1,07 | 1,02 | 1,18 | 1,09 |
| Transitional endoplasmic reticulum ATPase OS=Homo sapiens GN=VCP PE=1 SV=4 - [TERA_HUMAN]              | 1,14 | 1,20 | 1,10 | 1,15 |
| Transketolase OS=Homo sapiens GN=TKT PE=1 SV=3 - [TKT_HUMAN]                                           | 1,16 | 1,11 | 1,18 | 1,15 |
| Translational activator GCN1 OS=Homo sapiens GN=GCN1L1 PE=1 SV=6 - [GCN1L_HUMAN]                       | 1,08 | 1,12 | 1,11 | 1,10 |
| Translationally-controlled tumor protein OS=Homo sapiens GN=TPT1 PE=1 SV=1 - [TCTP_HUMAN]              | -    | 0,70 | 0,69 | 0,69 |
| Translocator protein OS=Homo sapiens GN=TSPO PE=1 SV=3 - [TSPOA_HUMAN]                                 | 1,59 | 1,49 | -    | 1,54 |
| Translocon-associated protein subunit alpha OS=Homo sapiens GN=SSR1 PE=1 SV=3 - [SSRA_HUMAN]           | -    | -    | 1,58 | 1,58 |
| Translocon-associated protein subunit delta OS=Homo sapiens GN=SSR4 PE=1 SV=1 - [SSRD_HUMAN]           | 0,64 | 1,46 | 0,47 | 0,86 |
| Transmembrane 9 superfamily member 4 OS=Homo sapiens GN=TM9SF4 PE=1 SV=2 - [TM9S4_HUMAN]               | 0,82 | -    | -    | 0,82 |
| Transmembrane emp24 domain-containing protein 10 OS=Homo sapiens GN=TMED10 PE=1 SV=2 - [TMEDA_HUMAN]   | 0,80 | 0,94 | 0,98 | 0,91 |
| Transmembrane emp24 domain-containing protein 2 OS=Homo sapiens GN=TMED2 PE=1 SV=1 - [TMED2_HUMAN]     | 0,86 | 0,85 | 0,94 | 0,89 |
| Transmembrane emp24 domain-containing protein 9 OS=Homo sapiens GN=TMED9 PE=1 SV=2 - [TMED9_HUMAN]     | -    | 1,86 | -    | 1,86 |
| Transmembrane protein 14C OS=Homo sapiens GN=TMEM14C PE=1 SV=1 - [TM14C_HUMAN]                         | 2,14 | -    | -    | 2,14 |
| Transportin-1 OS=Homo sapiens GN=TNPO1 PE=1 SV=2 - [TNPO1_HUMAN]                                       | 0,89 | 0,85 | 0,86 | 0,86 |
| Transportin-3 OS=Homo sapiens GN=TNPO3 PE=1 SV=3 - [TNPO3_HUMAN]                                       | 1,18 | 1,27 | 1,35 | 1,27 |
| Treacle protein OS=Homo sapiens GN=TCOF1 PE=1 SV=3 - [TCOF_HUMAN]                                      | 1,25 | 1,07 | 1,18 | 1,16 |
| Trifunctional enzyme subunit alpha, mitochondrial OS=Homo sapiens GN=HADHA PE=1 SV=2 - [ECHA_HUMAN]    | 1,21 | 0,97 | 1,07 | 1,08 |
| Trifunctional enzyme subunit beta, mitochondrial OS=Homo sapiens GN=HADHB PE=1 SV=3 - [ECHB_HUMAN]     | 1,43 | 1,45 | 1,15 | 1,34 |
| Trifunctional purine biosynthetic protein adenosine-3 OS=Homo sapiens GN=GART PE=1 SV=1 - [PUR2_HUMAN] | 1,00 | 0,96 | 0,99 | 0,98 |
| Triosephosphate isomerase OS=Homo sapiens GN=TPI1 PE=1 SV=3 - [TPIS_HUMAN]                             | 1,02 | 1,05 | 1,00 | 1,02 |
| Tripeptidyl-peptidase 1 OS=Homo sapiens GN=TPP1 PE=1 SV=2 - [TPP1_HUMAN]                               | 0,69 | 1,96 | -    | 1,33 |
| Tripeptidyl-peptidase 2 OS=Homo sapiens GN=TPP2 PE=1 SV=4 - [TPP2_HUMAN]                               | 2,16 | 0,95 | 2,21 | 1,77 |
| tRNA (cytosine(34)-C(5))-methyltransferase OS=Homo sapiens GN=NSUN2 PE=1 SV=2 - [NSUN2_HUMAN]          | 0,94 | 0,73 | 1,05 | 0,90 |
| tRNA-splicing ligase RtcB homolog OS=Homo sapiens GN=RTCB PE=1 SV=1 - [RTCB_HUMAN]                     | 1,02 | 0,63 | -    | 0,83 |
| Tropomyosin alpha-4 chain OS=Homo sapiens GN=TPM4 PE=1 SV=3 - [TPM4_HUMAN]                             | -    | 1,02 | -    | 1,02 |
| Tryptophan--tRNA ligase, cytoplasmic OS=Homo sapiens GN=WARS PE=1 SV=2 - [SYWC_HUMAN]                  | 1,27 | 1,06 | 1,03 | 1,12 |
| Tubulin alpha-1C chain OS=Homo sapiens GN=TUBA1C PE=1 SV=1 - [TBA1C_HUMAN]                             | 1,08 | 1,20 | 1,19 | 1,16 |
| Tubulin alpha-3E chain OS=Homo sapiens GN=TUBA3E PE=1 SV=2 - [TBA3E_HUMAN]                             | -    | -    | 0,58 | 0,58 |
| Tubulin beta chain OS=Homo sapiens GN=TUBB PE=1 SV=2 - [TBB5_HUMAN]                                    | 0,84 | 0,94 | 0,91 | 0,89 |
| Tubulin beta-2A chain OS=Homo sapiens GN=TUBB2A PE=1 SV=1 - [TBB2A_HUMAN]                              | 1,84 | 1,43 | -    | 1,63 |
| Tubulin beta-3 chain OS=Homo sapiens GN=TUBB3 PE=1 SV=2 - [TBB3_HUMAN]                                 | 0,62 | 0,74 | 0,89 | 0,75 |
| Tubulin beta-4A chain OS=Homo sapiens GN=TUBB4A PE=1 SV=2 - [TBB4A_HUMAN]                              | 1,13 | 1,08 | 0,85 | 1,02 |
| Tubulin beta-4B chain OS=Homo sapiens GN=TUBB4B PE=1 SV=1 - [TBB4B_HUMAN]                              | 0,91 | 0,87 | 0,87 | 0,88 |
| Tubulin beta-6 chain OS=Homo sapiens GN=TUBB6 PE=1 SV=1 - [TBB6_HUMAN]                                 | 0,79 | 0,66 | 0,71 | 0,72 |
| Tubulin-specific chaperone D OS=Homo sapiens GN=TBCE PE=1 SV=2 - [TBCE_HUMAN]                          | 1,27 | 1,44 | 1,33 | 1,35 |
| Tubulin-specific chaperone E OS=Homo sapiens GN=TBCE PE=1 SV=1 - [TBCE_HUMAN]                          | -    | -    | 0,81 | 0,81 |
| Tubulin--tyrosine ligase-like protein 12 OS=Homo sapiens GN=TTL12 PE=1 SV=2 - [TTL12_HUMAN]            | 0,79 | 1,25 | 1,02 | 1,02 |
| Tumor suppressor p53-binding protein 1 OS=Homo sapiens GN=TP53BP1 PE=1 SV=2 - [TP53B_HUMAN]            | -    | 0,93 | 1,04 | 0,98 |
| Twinfilin-1 OS=Homo sapiens GN=TWFL1 PE=1 SV=3 - [TWFL1_HUMAN]                                         | 1,06 | -    | -    | 1,06 |
| Twinfilin-2 OS=Homo sapiens GN=TWFL2 PE=1 SV=2 - [TWFL2_HUMAN]                                         | 1,38 | -    | 1,87 | 1,62 |
| Tyrosine-protein kinase BAZ1B OS=Homo sapiens GN=BAZ1B PE=1 SV=2 - [BAZ1B_HUMAN]                       | 1,15 | 1,40 | 0,82 | 1,12 |
| Tyrosine-protein phosphatase non-receptor type 23 OS=Homo sapiens GN=PTPN23 PE=1 SV=1 - [PTN23_HUMAN]  | -    | -    | 0,22 | 0,22 |
| Tyrosine--tRNA ligase, cytoplasmic OS=Homo sapiens GN=YARS PE=1 SV=4 - [SYYC_HUMAN]                    | 0,98 | 0,91 | 0,94 | 0,95 |
| U1 small nuclear ribonucleoprotein A OS=Homo sapiens GN=SNRPA PE=1 SV=3 - [SNRPA_HUMAN]                | 0,86 | -    | -    | 0,86 |
| U2 snRNP-associated SURP motif-containing protein OS=Homo sapiens GN=U2SURP PE=1 SV=2 - [SR140_HUMAN]  | 1,54 | 1,37 | -    | 1,45 |

|                                                                                                                              |      |      |      |      |
|------------------------------------------------------------------------------------------------------------------------------|------|------|------|------|
| U4/U6.U5 tri-snRNP-associated protein 1 OS=Homo sapiens GN=SART1 PE=1 SV=1 - [SNUT1_HUMAN]                                   | 1,55 | 1,49 | 1,17 | 1,40 |
| U5 small nuclear ribonucleoprotein 200 kDa helicase OS=Homo sapiens GN=SNRNP200 PE=1 SV=2 - [U520_HUMAN]                     | 0,93 | 0,94 | 0,89 | 0,92 |
| Ubiquitin-2 OS=Homo sapiens GN=UBQLN2 PE=1 SV=2 - [UBQL2_HUMAN]                                                              | 0,81 | -    | 1,33 | 1,07 |
| Ubiquitin carboxyl-terminal hydrolase 10 OS=Homo sapiens GN=USP10 PE=1 SV=2 - [UBP10_HUMAN]                                  | 0,97 | 0,88 | -    | 0,93 |
| Ubiquitin carboxyl-terminal hydrolase 14 OS=Homo sapiens GN=USP14 PE=1 SV=3 - [UBP14_HUMAN]                                  | 0,73 | 0,95 | 1,05 | 0,91 |
| Ubiquitin carboxyl-terminal hydrolase 5 OS=Homo sapiens GN=USP5 PE=1 SV=2 - [UBP5_HUMAN]                                     | 1,43 | 1,15 | 1,28 | 1,29 |
| Ubiquitin carboxyl-terminal hydrolase 7 OS=Homo sapiens GN=USP7 PE=1 SV=2 - [UBP7_HUMAN]                                     | 1,01 | 0,85 | 1,16 | 1,00 |
| Ubiquitin conjugation factor E4 A OS=Homo sapiens GN=UBE4A PE=1 SV=2 - [UBE4A_HUMAN]                                         | -    | -    | 1,07 | 1,07 |
| Ubiquitin thioesterase OTUB1 OS=Homo sapiens GN=OTUB1 PE=1 SV=2 - [OTUB1_HUMAN]                                              | 0,96 | 1,01 | 1,07 | 1,01 |
| Ubiquitin-40S ribosomal protein S27a OS=Homo sapiens GN=RPS27A PE=1 SV=2 - [RS27A_HUMAN]                                     | 0,98 | 0,85 | 0,97 | 0,93 |
| Ubiquitin-associated protein 2 OS=Homo sapiens GN=UBAP2 PE=1 SV=1 - [UBAP2_HUMAN]                                            | 0,84 | 0,66 | 0,63 | 0,71 |
| Ubiquitin-associated protein 2-like OS=Homo sapiens GN=UBAP2L PE=1 SV=2 - [UBP2L_HUMAN]                                      | 1,07 | 1,00 | 0,99 | 1,02 |
| Ubiquitin-conjugating enzyme E2 D3 OS=Homo sapiens GN=UBE2D3 PE=1 SV=1 - [UB2D3_HUMAN]                                       | -    | 2,72 | 1,17 | 1,95 |
| Ubiquitin-conjugating enzyme E2 O OS=Homo sapiens GN=UBE2O PE=1 SV=3 - [UBE2O_HUMAN]                                         | 1,45 | 1,31 | 2,18 | 1,64 |
| Ubiquitin-conjugating enzyme E2 variant 2 OS=Homo sapiens GN=UBE2V2 PE=1 SV=4 - [UB2V2_HUMAN]                                | -    | 0,82 | -    | 0,82 |
| Ubiquitin-like modifier-activating enzyme 1 OS=Homo sapiens GN=UBA1 PE=1 SV=3 - [UBA1_HUMAN]                                 | 1,22 | 1,33 | 1,26 | 1,27 |
| UDP-glucose 4-epimerase OS=Homo sapiens GN=GALE PE=1 SV=2 - [GALE_HUMAN]                                                     | -    | 3,92 | -    | 3,92 |
| UDP-glucose 6-dehydrogenase OS=Homo sapiens GN=UGDH PE=1 SV=1 - [UGDH_HUMAN]                                                 | 1,14 | 1,27 | 1,33 | 1,25 |
| UDP-glucose:glycoprotein glucosyltransferase 1 OS=Homo sapiens GN=UGGT1 PE=1 SV=3 - [UGGG1_HUMAN]                            | 0,81 | 0,89 | 0,86 | 0,85 |
| UMP-CMP kinase OS=Homo sapiens GN=CMPK1 PE=1 SV=3 - [KCY_HUMAN]                                                              | 1,47 | -    | 1,29 | 1,38 |
| Uncharacterized protein KIAA0090 OS=Homo sapiens GN=KIAA0090 PE=1 SV=1 - [K0090_HUMAN]                                       | 0,78 | 0,95 | 1,10 | 0,95 |
| Unconventional myosin-Ic OS=Homo sapiens GN=MYO1C PE=1 SV=4 - [MYO1C_HUMAN]                                                  | 1,04 | 0,74 | 0,65 | 0,81 |
| UPF0160 protein MYG1, mitochondrial OS=Homo sapiens GN=C12orf10 PE=1 SV=2 - [MYG1_HUMAN]                                     | -    | -    | 4,08 | 4,08 |
| UPF0556 protein C19orf10 OS=Homo sapiens GN=C19orf10 PE=1 SV=1 - [CS010_HUMAN]                                               | 0,83 | 0,77 | 0,72 | 0,77 |
| UPF0667 protein C1orf55 OS=Homo sapiens GN=C1orf55 PE=1 SV=1 - [CA055_HUMAN]                                                 | 0,83 | -    | -    | 0,83 |
| Utrophin OS=Homo sapiens GN=UTRN PE=1 SV=2 - [UTRO_HUMAN]                                                                    | 0,70 | 0,86 | 0,60 | 0,72 |
| UV excision repair protein RAD23 homolog B OS=Homo sapiens GN=RAD23B PE=1 SV=1 - [RD23B_HUMAN]                               | 1,41 | 1,36 | 1,21 | 1,33 |
| Vacuolar protein sorting-associated protein 26A OS=Homo sapiens GN=VPS26A PE=1 SV=2 - [VP26A_HUMAN]                          | -    | 1,89 | -    | 1,89 |
| Vacuolar protein sorting-associated protein 35 OS=Homo sapiens GN=VPS35 PE=1 SV=2 - [VPS35_HUMAN]                            | 1,17 | 0,84 | 0,64 | 0,88 |
| Valine-tRNA ligase OS=Homo sapiens GN=VARS PE=1 SV=4 - [SYVC_HUMAN]                                                          | 1,17 | 1,10 | 1,15 | 1,14 |
| Very long-chain specific acyl-CoA dehydrogenase, mitochondrial OS=Homo sapiens GN=ACADVL PE=1 SV=1 - [ACADV_HUMAN]           | 1,19 | 1,58 | 1,06 | 1,28 |
| Very-long-chain (3R)-3-hydroxyacyl-[acyl-carrier protein] dehydratase 3 OS=Homo sapiens GN=PTPLAD1 PE=1 SV=2 - [HACD3_HUMAN] | 2,73 | 1,28 | 1,04 | 1,68 |
| Very-long-chain enoyl-CoA reductase OS=Homo sapiens GN=TECR PE=1 SV=1 - [TECR_HUMAN]                                         | 1,19 | 0,96 | 0,76 | 0,97 |
| Vesicle transport protein GOT1B OS=Homo sapiens GN=GOLT1B PE=1 SV=1 - [GOT1B_HUMAN]                                          | -    | -    | 2,47 | 2,47 |
| Vesicle-trafficking protein SEC22b OS=Homo sapiens GN=SEC22B PE=1 SV=4 - [SC22B_HUMAN]                                       | 0,82 | -    | 0,41 | 0,62 |
| Vigilin OS=Homo sapiens GN=HDLBP PE=1 SV=2 - [VIGLN_HUMAN]                                                                   | 0,81 | 1,33 | 0,85 | 1,00 |
| Vimentin OS=Homo sapiens GN=VIM PE=1 SV=4 - [VIME_HUMAN]                                                                     | 0,85 | 0,91 | 0,95 | 0,90 |
| Vinculin OS=Homo sapiens GN=VCL PE=1 SV=4 - [VINC_HUMAN]                                                                     | 1,01 | 0,97 | 1,09 | 1,02 |
| Vitamin K epoxide reductase complex subunit 1 OS=Homo sapiens GN=VKORC1 PE=1 SV=1 - [VKOR1_HUMAN]                            | 1,07 | 0,99 | 0,96 | 1,01 |
| Voltage-dependent anion-selective channel protein 1 OS=Homo sapiens GN=VDAC1 PE=1 SV=2 - [VDAC1_HUMAN]                       | 1,12 | 1,06 | 1,04 | 1,07 |
| Voltage-dependent anion-selective channel protein 2 OS=Homo sapiens GN=VDAC2 PE=1 SV=2 - [VDAC2_HUMAN]                       | 1,02 | 0,97 | 1,10 | 1,03 |
| Voltage-dependent anion-selective channel protein 3 OS=Homo sapiens GN=VDAC3 PE=1 SV=1 - [VDAC3_HUMAN]                       | 0,93 | 0,96 | 0,94 | 0,94 |
| V-type proton ATPase 116 kDa subunit a isoform 1 OS=Homo sapiens GN=ATP6V0A1 PE=2 SV=3 - [VPP1_HUMAN]                        | 1,15 | 1,22 | 1,07 | 1,15 |
| V-type proton ATPase catalytic subunit A OS=Homo sapiens GN=ATP6V1A PE=1 SV=2 - [VATA_HUMAN]                                 | 1,10 | 1,07 | 1,41 | 1,19 |
| V-type proton ATPase subunit B, brain isoform OS=Homo sapiens GN=ATP6V1B2 PE=1 SV=3 - [VATB2_HUMAN]                          | 0,76 | -    | -    | 0,76 |



|                                                                                                      |      |      |      |      |
|------------------------------------------------------------------------------------------------------|------|------|------|------|
| WASH complex subunit 7 OS=Homo sapiens GN=KIAA1033 PE=1 SV=2 - [WASH7_HUMAN]                         | 1,10 | -    | -    | 1,10 |
| WASH complex subunit strumpellin OS=Homo sapiens GN=KIAA0196 PE=1 SV=1 - [STRUM_HUMAN]               | 1,41 | 0,79 | 2,71 | 1,64 |
| WD repeat-containing protein 1 OS=Homo sapiens GN=WDR1 PE=1 SV=4 - [WDR1_HUMAN]                      | 1,41 | 2,15 | -    | 1,78 |
| WD repeat-containing protein 3 OS=Homo sapiens GN=WDR3 PE=1 SV=1 - [WDR3_HUMAN]                      | 0,93 | -    | -    | 0,93 |
| WD repeat-containing protein 36 OS=Homo sapiens GN=WDR36 PE=1 SV=1 - [WDR36_HUMAN]                   | 1,22 | 1,54 | -    | 1,38 |
| Wiskott-Aldrich syndrome protein family member 2 OS=Homo sapiens GN=WASF2 PE=1 SV=3 - [WASF2_HUMAN]  | -    | -    | 0,19 | 0,19 |
| Xaa-Pro dipeptidase OS=Homo sapiens GN=PEPD PE=1 SV=3 - [PEPD_HUMAN]                                 | 1,90 | -    | -    | 1,90 |
| X-ray repair cross-complementing protein 5 OS=Homo sapiens GN=XRCC5 PE=1 SV=3 - [XRCC5_HUMAN]        | 0,95 | 0,97 | 1,00 | 0,98 |
| X-ray repair cross-complementing protein 6 OS=Homo sapiens GN=XRCC6 PE=1 SV=2 - [XRCC6_HUMAN]        | 0,92 | 1,04 | 1,03 | 0,99 |
| YLP motif-containing protein 1 OS=Homo sapiens GN=YLPM1 PE=1 SV=3 - [YLPM1_HUMAN]                    | 0,69 | 0,65 | -    | 0,67 |
| Zinc finger and BTB domain-containing protein 10 OS=Homo sapiens GN=ZBTB10 PE=1 SV=2 - [ZBT10_HUMAN] | -    | 0,66 | -    | 0,66 |
| Zinc finger CCCH domain-containing protein 11A OS=Homo sapiens GN=ZC3H11A PE=1 SV=3 - [ZC11A_HUMAN]  | 0,59 | 0,59 | 0,65 | 0,61 |
| Zinc finger CCCH-type antiviral protein 1 OS=Homo sapiens GN=ZC3HAV1 PE=1 SV=3 - [ZC3HAV1_HUMAN]     | 0,82 | 0,84 | 0,91 | 0,86 |
| Zinc finger FYVE domain-containing protein 26 OS=Homo sapiens GN=ZFYVE26 PE=1 SV=3 - [ZFY26_HUMAN]   | -    | -    | 1,20 | 1,20 |
| Zinc finger RNA-binding protein OS=Homo sapiens GN=ZFR PE=1 SV=2 - [ZFR_HUMAN]                       | 1,21 | 0,87 | 0,81 | 0,96 |
| Zinc phosphodiesterase ELAC protein 2 OS=Homo sapiens GN=ELAC2 PE=1 SV=2 - [RNZ2_HUMAN]              | 1,17 | 1,15 | 1,09 | 1,14 |
| Zyxin OS=Homo sapiens GN=ZYX PE=1 SV=1 - [ZYX_HUMAN]                                                 | 0,99 | 1,09 | 0,86 | 0,98 |
